# Supplementary material for: 3D facial phenotyping by biometric sibling matching used in contemporary genomic methodologies
Source: PLoS Genet. 2021 May 13;17(5):e1009528. doi: 10.1371/journal.pgen.1009528 (PMC8118281; doi:10.1371/journal.pgen.1009528)
Supplement: S2 Table — R1, rank-1% identification rate; R10, rank-10% identification rate; R20, rank-20% identification rate; ED, Euclidean distance; EA, Euclidean angle; MD, Mahalanobis distance; MA, Mahalanobis angle. (XLSX) [file pgen.1009528.s016.xlsx]

## Sheet: S2Table
S2 Table. Biometric identification results for individual and combined segments. R1, rank-1% identification rate; R10, rank-10% identification rate; R20, rank-20% identification rate; ED, Euclidean distance; EA, Euclidean angle; MD, Mahalanobis distance; MA, Mahalanobis angle.
		R1%				R2%				R3%				R4%				R5%				R6%				R7%				R8%				R9%				R10%				R11%				R12%
Segment	Quadrant	ED	EA	MD	MA	ED	EA	MD	MA	ED	EA	MD	MA	ED	EA	MD	MA	ED	EA	MD	MA	ED	EA	MD	MA	ED	EA	MD	MA	ED	EA	MD	MA	ED	EA	MD	MA	ED	EA	MD	MA	ED	EA	MD	MA	ED	EA	MD	MA
combined	-	15.7509	17.9487	31.685	44.3223	20.8791	24.7253	40.293	52.7473	26.0073	30.4029	47.2527	60.2564	32.4176	35.7143	50.7326	63.9194	36.8132	39.011	55.3114	68.4982	39.3773	42.4908	58.4249	71.0623	41.9414	45.0549	61.1722	73.8095	44.5055	48.3516	63.1868	76.7399	47.4359	52.9304	65.2015	79.1209	48.9011	55.1282	66.8498	81.5018	51.0989	57.6923	69.0476	83.3333	53.1136	58.4249	71.2454	85.348
segment 1	full face (1)	11.9048	13.0037	28.7546	36.8132	16.3004	20.3297	37.1795	47.8022	19.4139	23.4432	45.4212	54.9451	22.7106	26.9231	49.0842	60.0733	25.2747	29.8535	53.1136	66.8498	28.3883	32.7839	56.2271	71.4286	31.8681	35.8974	58.7912	72.8938	34.2491	37.5458	60.989	74.7253	36.4469	40.293	63.7363	76.7399	39.011	43.0403	66.3004	77.4725	40.6593	45.4212	67.9487	78.9377	43.0403	47.8022	70.5128	80.0366
segment 2	midface (2)	6.04396	5.86081	13.1868	18.315	9.70696	10.0733	18.1319	25.2747	12.8205	13.5531	23.0769	30.7692	16.6667	16.1172	26.9231	36.63	20.696	19.0476	31.3187	43.0403	23.9927	20.8791	36.2637	46.1538	27.1062	23.4432	39.9267	48.9011	29.4872	26.1905	42.1245	51.4652	32.0513	29.304	44.6886	53.1136	33.6996	32.967	47.8022	54.3956	35.5311	35.1648	50.1832	56.044	36.63	36.9963	52.381	58.9744
segment 3	outer face (3)	9.70696	10.989	21.7949	30.7692	14.652	17.2161	32.967	39.5604	18.1319	20.8791	38.8278	46.1538	21.6117	23.9927	43.7729	51.8315	23.9927	28.2051	47.9853	59.1575	26.1905	30.7692	50.9158	61.9048	28.9377	32.0513	54.7619	65.5678	30.4029	33.8828	57.6923	68.6813	32.7839	36.9963	59.8901	71.6117	35.8974	39.9267	61.7216	72.7106	37.1795	41.5751	62.4542	75.0916	39.7436	43.4066	64.652	76.7399
segment 4	philtrum (I)	5.31136	5.31136	6.04396	7.14286	8.60806	8.60806	9.70696	11.7216	12.6374	11.1722	13.0037	16.6667	15.3846	14.4689	16.3004	20.3297	18.8645	17.2161	19.9634	25.0916	20.8791	19.7802	22.7106	28.022	22.1612	23.4432	25.2747	30.4029	23.4432	25.641	27.6557	32.967	26.0073	27.2894	30.7692	36.8132	28.3883	29.1209	32.967	38.4615	29.8535	30.7692	35.1648	40.293	31.685	33.5165	36.63	43.2234
segment 5	nose (II)	6.22711	6.77656	8.97436	12.8205	10.2564	9.52381	15.3846	19.4139	14.2857	13.0037	21.0623	25.8242	17.5824	16.1172	24.5421	29.4872	20.5128	19.9634	28.2051	34.4322	23.0769	22.3443	31.1355	37.5458	24.9084	24.7253	34.0659	39.5604	27.4725	27.4725	37.3626	41.5751	30.0366	30.7692	39.1941	43.956	32.6007	33.1502	41.9414	45.4212	34.9817	36.0806	43.5897	47.9853	36.63	39.1941	45.2381	50.5495
segment 6	lower face (III)	5.67766	7.50916	9.70696	13.37	9.15751	11.9048	15.0183	22.7106	12.4542	14.652	20.8791	28.3883	14.2857	16.8498	24.9084	32.2344	16.4835	19.0476	29.6703	36.63	18.1319	21.978	32.4176	40.8425	20.1465	24.5421	34.4322	43.4066	22.3443	26.7399	36.4469	45.7875	25.4579	29.304	41.5751	48.3516	28.022	31.8681	43.956	52.1978	29.6703	33.3333	45.0549	55.1282	30.9524	35.348	47.2527	56.5934
segment 7	upper face (IV)	12.6374	13.0037	18.6813	25.0916	18.315	21.0623	26.1905	36.63	22.3443	24.9084	31.8681	40.6593	26.1905	28.3883	36.9963	45.2381	30.2198	32.4176	41.5751	47.8022	32.4176	35.1648	46.1538	51.4652	35.348	37.1795	47.4359	55.1282	37.5458	40.6593	50.3663	57.5092	39.7436	43.0403	52.1978	58.7912	41.7582	46.1538	54.9451	60.989	43.5897	46.5201	57.1429	64.2857	44.5055	47.8022	58.0586	67.2161
segment 8	philtrum (I)	3.11355	4.7619	6.04396	7.69231	6.41026	7.50916	9.52381	10.2564	9.70696	10.8059	13.9194	13.37	12.4542	13.5531	16.3004	17.033	14.1026	15.0183	19.7802	19.4139	17.3993	16.6667	21.4286	21.2454	19.0476	18.8645	22.3443	23.4432	22.8938	21.0623	23.8095	26.7399	24.5421	24.1758	27.8388	29.8535	26.0073	26.9231	29.304	32.4176	28.022	28.9377	31.1355	34.7985	30.2198	30.4029	32.0513	36.63
segment 9	philtrum (I)	4.3956	3.663	4.94505	5.67766	7.87546	6.04396	8.24176	9.15751	10.4396	9.34066	11.3553	12.2711	14.2857	12.4542	13.37	15.5678	15.9341	16.3004	16.6667	18.4982	18.4982	17.7656	18.1319	20.5128	20.1465	19.5971	20.1465	24.1758	22.5275	21.4286	22.7106	26.1905	25.0916	23.0769	24.7253	30.0366	26.0073	25.2747	26.9231	33.3333	27.8388	26.7399	28.5714	35.5311	29.1209	28.3883	31.3187	37.9121
segment 10	nose (II)	5.31136	5.67766	6.04396	7.87546	8.05861	9.89011	10.0733	11.1722	10.989	13.5531	14.652	15.2015	12.8205	15.2015	16.6667	20.3297	17.5824	16.4835	19.9634	23.0769	19.5971	18.6813	21.6117	26.9231	21.4286	21.2454	23.9927	30.0366	22.8938	22.8938	27.1062	32.6007	24.5421	24.5421	29.4872	34.4322	26.0073	27.2894	32.7839	36.0806	27.4725	29.6703	34.7985	37.7289	29.6703	30.9524	35.8974	40.293
segment 11	nose (II)	7.87546	8.24176	8.60806	10.4396	11.1722	11.5385	13.5531	18.315	13.1868	13.5531	16.6667	22.3443	15.5678	16.4835	20.1465	26.9231	18.8645	20.1465	23.9927	31.3187	22.1612	23.0769	26.1905	34.2491	24.359	24.359	28.9377	36.2637	26.7399	27.1062	31.1355	38.2784	28.7546	28.5714	34.0659	40.6593	30.5861	30.9524	37.3626	41.7582	33.1502	33.5165	39.7436	43.7729	35.1648	36.0806	41.0256	44.8718
segment 12	lower face (III)	5.49451	6.41026	8.42491	11.3553	8.42491	10.4396	13.5531	17.7656	11.7216	13.9194	18.6813	25.8242	14.2857	16.8498	24.359	30.7692	16.6667	20.696	29.304	35.5311	18.8645	24.1758	31.5018	38.0952	21.0623	26.3736	35.1648	40.8425	23.2601	28.9377	37.1795	42.1245	26.0073	31.1355	39.1941	43.7729	29.4872	32.967	41.3919	46.337	32.967	34.2491	43.4066	48.5348	34.6154	35.1648	44.5055	50.9158
segment 13	lower face (III)	4.3956	4.3956	7.32601	8.24176	8.05861	7.32601	11.9048	15.9341	10.4396	10.2564	16.8498	22.1612	13.9194	13.37	20.5128	26.0073	15.3846	18.1319	24.1758	29.1209	16.8498	20.8791	26.1905	31.685	18.8645	22.1612	27.4725	34.2491	20.3297	23.6264	28.7546	37.5458	21.4286	26.7399	30.4029	41.5751	22.8938	28.3883	32.4176	43.0403	25.0916	30.2198	34.9817	45.0549	26.7399	32.6007	36.2637	46.5201
segment 14	upper face (IV)	8.42491	11.1722	8.24176	10.4396	13.37	15.0183	13.37	16.3004	17.7656	19.2308	16.1172	19.7802	21.6117	23.2601	20.3297	24.1758	24.359	27.6557	23.8095	28.9377	28.022	30.0366	26.1905	32.4176	31.5018	32.6007	28.7546	36.0806	32.0513	34.7985	31.8681	39.011	35.348	37.3626	34.0659	41.3919	36.8132	39.9267	36.2637	44.6886	39.011	41.7582	38.4615	45.7875	40.4762	44.5055	41.5751	46.7033
segment 15	upper face (IV)	10.0733	10.4396	14.1026	18.8645	15.0183	17.2161	19.9634	28.2051	19.0476	21.2454	24.7253	32.6007	23.0769	24.5421	28.022	36.8132	26.0073	28.3883	34.0659	40.6593	28.9377	30.7692	37.5458	44.1392	30.4029	33.6996	39.7436	47.9853	32.6007	36.8132	41.0256	49.2674	35.7143	39.9267	43.2234	52.381	37.7289	43.0403	45.2381	53.8462	39.9267	44.6886	46.8864	56.4103	43.2234	46.1538	49.6337	57.6923
segment 16	philtrum (I)	2.5641	2.1978	2.5641	3.47985	5.12821	5.31136	4.57875	6.77656	8.42491	7.87546	6.77656	8.79121	11.1722	11.7216	9.15751	11.9048	13.1868	15.5678	12.6374	14.8352	15.2015	17.9487	15.0183	17.9487	17.033	20.1465	17.3993	21.2454	19.5971	21.7949	19.5971	23.0769	21.4286	23.2601	21.7949	25.2747	23.0769	25.2747	24.7253	27.2894	24.7253	27.6557	26.9231	28.5714	26.1905	28.5714	28.3883	29.6703
segment 17	philtrum (I)	4.7619	4.94505	4.21245	4.7619	6.77656	8.24176	7.32601	9.15751	9.70696	11.1722	10.0733	12.4542	12.4542	13.37	12.4542	15.7509	14.2857	15.7509	15.3846	17.7656	17.033	18.315	17.2161	19.5971	19.5971	19.4139	20.1465	21.6117	21.2454	21.6117	22.3443	23.2601	23.8095	23.2601	24.1758	24.359	25.4579	25.2747	26.3736	26.7399	26.7399	27.1062	28.3883	29.4872	28.2051	28.022	30.7692	31.1355
segment 18	philtrum (I)	4.0293	3.84615	2.9304	3.663	7.87546	5.86081	5.86081	6.95971	9.52381	8.24176	9.34066	10.8059	10.6227	9.70696	11.5385	14.4689	12.2711	12.6374	14.4689	16.3004	14.1026	14.652	17.5824	18.1319	15.9341	16.4835	19.9634	19.7802	17.3993	17.7656	21.978	21.6117	19.0476	18.8645	23.9927	23.9927	20.5128	19.9634	25.8242	27.6557	21.4286	21.0623	27.6557	29.6703	22.8938	21.6117	29.304	32.2344
segment 19	philtrum (I)	3.47985	3.47985	2.1978	2.5641	5.86081	5.12821	6.41026	6.59341	9.15751	9.34066	8.24176	10.6227	10.989	10.6227	10.989	13.5531	12.8205	13.1868	13.9194	17.033	13.7363	16.3004	15.9341	19.5971	15.0183	18.315	18.1319	21.6117	17.2161	20.8791	20.1465	23.2601	19.5971	23.8095	21.7949	25.4579	20.8791	25.0916	23.0769	28.2051	22.7106	25.8242	23.8095	29.4872	23.9927	27.6557	26.5568	31.8681
segment 20	nose (II)	1.8315	3.47985	1.0989	1.4652	3.84615	5.31136	3.84615	4.21245	7.32601	8.05861	5.86081	6.22711	8.79121	9.52381	9.52381	8.60806	11.1722	12.8205	10.989	12.0879	13.5531	15.7509	12.4542	13.9194	15.2015	18.1319	15.0183	15.3846	16.8498	19.0476	16.1172	18.1319	18.315	21.4286	17.3993	20.696	19.7802	22.5275	19.2308	22.1612	22.1612	23.2601	21.4286	24.1758	23.6264	25.4579	23.8095	26.3736
segment 21	nose (II)	3.663	3.84615	5.31136	7.50916	5.67766	7.50916	9.89011	12.2711	9.34066	9.70696	14.2857	16.4835	12.6374	13.5531	18.4982	19.0476	14.8352	15.0183	22.5275	24.1758	17.3993	18.1319	24.7253	28.5714	19.4139	19.9634	27.2894	31.1355	23.0769	22.1612	28.5714	33.8828	24.5421	24.9084	30.2198	38.4615	27.6557	26.3736	31.5018	40.4762	28.7546	28.7546	33.6996	41.5751	29.4872	30.5861	35.7143	42.674
segment 22	nose (II)	5.31136	6.41026	6.77656	9.52381	8.97436	10.8059	13.7363	14.2857	11.7216	13.1868	16.4835	21.2454	15.2015	15.5678	19.7802	25.0916	18.4982	19.2308	23.4432	29.4872	19.9634	21.0623	25.8242	32.6007	21.978	23.0769	28.2051	34.0659	23.8095	25.0916	29.4872	36.2637	25.4579	26.0073	31.8681	39.011	27.4725	27.2894	33.6996	42.1245	29.1209	29.304	35.1648	43.7729	31.3187	31.1355	37.3626	45.0549
segment 23	nose (II)	1.64835	2.38095	2.38095	3.2967	5.12821	3.2967	5.31136	6.77656	7.32601	6.04396	7.87546	10.4396	9.52381	8.42491	10.0733	13.37	11.9048	11.7216	13.5531	15.3846	14.4689	13.5531	15.3846	17.5824	15.7509	16.4835	17.5824	19.9634	18.4982	18.4982	19.5971	22.7106	21.0623	20.1465	22.3443	24.9084	22.8938	22.1612	23.8095	26.5568	24.359	22.8938	25.8242	28.3883	25.641	24.7253	28.022	29.1209
segment 24	lower face (III)	6.41026	7.50916	4.0293	4.7619	10.2564	11.1722	8.05861	8.42491	12.8205	13.9194	10.2564	10.2564	14.4689	16.6667	13.37	14.4689	16.8498	20.1465	17.033	17.2161	18.4982	23.0769	18.8645	19.7802	22.7106	25.0916	19.9634	22.3443	24.9084	26.7399	21.4286	24.9084	26.7399	29.4872	25.4579	27.2894	28.9377	31.1355	26.9231	29.4872	30.0366	32.0513	28.022	31.5018	31.685	33.3333	30.0366	33.1502
segment 25	lower face (III)	4.57875	5.49451	7.87546	9.52381	8.60806	9.89011	12.0879	14.8352	10.2564	12.6374	14.2857	20.3297	13.5531	15.7509	18.8645	23.6264	15.7509	18.4982	23.2601	27.1062	18.1319	20.3297	25.641	30.0366	19.9634	22.5275	27.1062	31.1355	21.978	23.8095	30.2198	34.6154	23.8095	24.5421	32.967	37.1795	26.0073	26.0073	35.7143	39.5604	27.6557	27.6557	37.5458	41.5751	28.3883	28.7546	39.5604	43.5897
segment 26	lower face (III)	4.21245	5.49451	7.50916	8.60806	8.24176	7.87546	10.8059	14.1026	11.7216	12.2711	14.2857	17.2161	14.1026	14.1026	17.5824	19.4139	15.7509	18.1319	21.978	24.1758	19.0476	19.9634	23.9927	28.2051	20.8791	22.3443	26.1905	30.9524	22.5275	24.1758	29.6703	33.3333	24.359	27.2894	30.9524	36.8132	26.7399	29.8535	33.5165	39.011	28.2051	31.3187	34.7985	41.9414	29.4872	33.1502	35.7143	43.0403
segment 27	lower face (III)	5.67766	5.31136	5.49451	5.49451	8.24176	9.15751	8.60806	9.89011	10.989	11.9048	10.989	12.6374	12.4542	14.4689	13.37	15.7509	14.652	16.4835	16.1172	19.5971	16.8498	18.1319	18.4982	22.8938	19.0476	19.4139	20.1465	26.1905	21.0623	21.978	22.8938	29.8535	22.3443	24.359	25.2747	32.6007	23.4432	25.0916	27.2894	34.6154	24.9084	25.8242	28.2051	35.7143	26.5568	26.5568	30.0366	36.63
segment 28	upper face (IV)	6.04396	8.97436	3.663	7.69231	9.52381	14.4689	7.50916	13.0037	12.4542	17.3993	11.5385	16.3004	16.1172	19.0476	15.5678	18.8645	19.4139	23.4432	19.0476	21.978	23.0769	26.5568	21.978	23.8095	24.7253	29.4872	23.8095	26.9231	26.3736	32.0513	25.4579	28.5714	30.0366	35.1648	28.5714	31.1355	32.4176	37.1795	31.1355	32.4176	33.5165	39.3773	32.2344	34.0659	36.0806	40.4762	34.2491	35.8974
segment 29	upper face (IV)	8.24176	9.34066	7.14286	9.15751	12.6374	15.3846	12.4542	16.4835	15.5678	19.4139	16.8498	20.3297	18.1319	21.978	20.5128	22.8938	23.2601	26.3736	23.4432	25.641	26.7399	29.1209	25.8242	28.2051	28.9377	31.3187	26.7399	31.1355	30.0366	33.3333	28.9377	33.5165	34.0659	34.7985	31.8681	36.2637	36.4469	37.3626	33.6996	39.9267	38.6447	39.5604	35.5311	41.5751	40.8425	40.6593	37.1795	44.1392
segment 30	upper face (IV)	10.6227	9.70696	13.37	15.7509	14.1026	15.7509	22.1612	27.4725	17.7656	19.7802	27.1062	34.0659	22.8938	23.9927	31.685	38.2784	25.0916	28.7546	35.8974	41.9414	27.4725	31.1355	39.7436	44.1392	30.2198	33.3333	41.0256	47.4359	32.7839	35.7143	42.4908	49.4505	34.9817	37.7289	46.1538	51.8315	37.1795	39.9267	47.9853	53.2967	38.6447	41.9414	49.4505	54.7619	40.1099	42.674	50.9158	56.5934
segment 31	upper face (IV)	5.67766	7.87546	6.41026	6.77656	8.97436	11.5385	12.0879	13.0037	14.1026	15.3846	15.3846	19.2308	16.3004	18.315	18.4982	24.359	18.8645	21.4286	21.6117	27.4725	21.6117	24.359	24.1758	30.2198	23.6264	27.2894	27.2894	34.2491	25.2747	29.304	30.0366	35.8974	27.4725	31.8681	32.0513	38.4615	30.9524	33.6996	34.4322	40.8425	32.4176	34.9817	35.8974	43.4066	33.5165	36.8132	37.5458	45.6044
segment 32	philtrum (I)	4.0293	2.9304	2.9304	3.663	6.04396	5.86081	5.86081	6.95971	7.32601	8.97436	8.24176	10.0733	8.79121	11.1722	10.2564	11.7216	11.9048	14.2857	12.4542	13.0037	13.9194	16.6667	13.7363	14.2857	15.0183	18.6813	15.3846	15.3846	16.8498	20.696	16.8498	17.7656	18.315	22.3443	18.315	19.7802	19.7802	23.9927	19.9634	21.6117	22.3443	25.641	21.4286	23.0769	24.359	26.5568	22.5275	26.3736
segment 33	philtrum (I)	2.1978	2.1978	3.2967	3.84615	5.31136	6.04396	5.49451	6.95971	7.14286	8.24176	7.69231	9.52381	11.7216	10.0733	10.8059	12.0879	13.7363	13.5531	13.9194	15.5678	16.1172	15.9341	16.4835	18.8645	18.315	19.5971	17.9487	20.5128	19.0476	21.0623	20.3297	20.696	20.8791	22.7106	21.978	23.0769	22.1612	25.0916	23.4432	24.9084	22.8938	26.3736	25.0916	26.0073	24.359	27.8388	26.7399	26.7399
segment 34	philtrum (I)	2.9304	3.84615	4.7619	4.94505	5.31136	6.77656	8.60806	9.15751	9.15751	8.97436	12.2711	12.2711	10.989	10.4396	14.4689	15.0183	14.2857	11.7216	18.315	17.7656	16.6667	13.1868	20.3297	19.5971	19.4139	14.8352	22.5275	22.5275	20.3297	16.3004	24.359	23.9927	22.8938	19.7802	26.9231	25.2747	24.9084	21.7949	28.2051	27.8388	26.5568	24.5421	31.5018	29.8535	28.022	26.1905	32.7839	31.5018
segment 35	philtrum (I)	3.2967	3.11355	3.47985	3.2967	6.04396	6.41026	5.86081	6.41026	7.87546	8.97436	8.60806	8.42491	10.2564	11.1722	10.2564	10.6227	13.7363	13.5531	11.9048	13.5531	16.1172	15.2015	13.5531	15.2015	17.5824	17.3993	15.3846	17.2161	18.8645	18.4982	17.5824	18.4982	21.4286	21.0623	19.4139	20.8791	23.2601	23.6264	21.0623	22.8938	24.7253	25.641	23.4432	24.7253	26.5568	27.6557	24.1758	25.2747
segment 36	philtrum (I)	2.74725	2.38095	2.5641	2.74725	5.31136	4.57875	4.3956	5.86081	6.04396	6.59341	7.14286	8.97436	7.87546	7.69231	9.52381	11.3553	9.34066	10.6227	13.7363	14.652	11.1722	11.5385	15.3846	16.4835	12.8205	12.8205	17.033	17.7656	14.4689	14.1026	19.0476	20.3297	16.4835	16.4835	21.4286	21.7949	17.7656	18.1319	23.9927	23.4432	19.4139	19.9634	25.2747	26.1905	21.0623	21.978	26.9231	27.4725
segment 37	philtrum (I)	3.84615	3.11355	2.5641	2.9304	6.04396	5.49451	4.3956	5.67766	7.69231	7.14286	6.59341	6.41026	9.70696	8.79121	9.34066	9.15751	11.3553	10.989	12.4542	12.0879	12.6374	12.8205	13.5531	14.4689	14.1026	15.7509	15.2015	15.7509	15.9341	17.3993	15.9341	18.315	18.315	19.0476	18.315	19.7802	19.9634	20.1465	20.1465	21.2454	20.696	22.1612	21.4286	22.1612	21.2454	23.8095	22.3443	23.0769
segment 38	philtrum (I)	3.2967	3.11355	2.38095	2.5641	4.3956	5.49451	5.67766	4.7619	6.22711	7.32601	9.15751	8.24176	8.42491	9.89011	12.2711	12.0879	11.1722	11.7216	16.3004	16.6667	13.9194	15.3846	18.315	19.4139	16.4835	17.7656	20.696	22.5275	16.6667	20.1465	22.3443	23.9927	18.1319	21.2454	23.6264	26.0073	20.3297	22.5275	24.9084	28.2051	21.4286	24.1758	26.3736	29.8535	22.3443	25.4579	28.2051	31.1355
segment 39	philtrum (I)	4.3956	5.12821	4.3956	4.7619	6.95971	6.95971	5.67766	8.60806	8.42491	9.52381	7.14286	9.70696	9.89011	11.9048	9.89011	11.9048	13.0037	14.2857	13.1868	15.5678	14.8352	16.3004	15.3846	17.9487	17.5824	18.8645	17.9487	20.696	19.9634	21.0623	19.5971	22.8938	21.6117	22.1612	21.7949	25.0916	23.8095	24.9084	23.4432	26.3736	25.641	26.1905	24.7253	27.1062	26.7399	27.6557	25.8242	28.7546
segment 40	nose (II)	2.1978	4.57875	2.1978	3.11355	3.663	6.22711	4.21245	5.12821	5.67766	7.69231	6.22711	7.14286	7.50916	9.70696	7.14286	8.60806	10.8059	12.4542	9.52381	10.6227	12.6374	14.2857	11.1722	12.0879	14.8352	16.6667	11.7216	12.8205	17.033	18.315	12.4542	14.4689	19.0476	20.696	15.3846	16.1172	20.696	22.8938	17.033	17.9487	21.978	25.2747	19.2308	19.9634	23.9927	26.3736	19.9634	21.7949
segment 41	nose (II)	2.5641	2.1978	4.21245	3.84615	5.67766	5.49451	7.69231	8.42491	8.05861	8.05861	10.2564	10.989	10.6227	11.3553	12.0879	13.37	13.1868	13.5531	14.8352	16.6667	14.2857	15.2015	16.4835	18.6813	15.3846	17.3993	17.9487	20.3297	16.4835	19.5971	19.2308	21.2454	19.2308	20.5128	21.4286	23.0769	21.0623	21.978	22.8938	24.7253	22.3443	23.4432	24.9084	26.3736	24.359	25.641	25.641	27.8388
segment 42	nose (II)	3.2967	4.94505	4.94505	5.12821	6.22711	7.69231	7.87546	9.34066	8.60806	10.2564	10.6227	12.4542	11.3553	12.2711	14.1026	16.3004	14.1026	14.4689	16.1172	18.6813	16.1172	15.7509	18.6813	20.5128	18.4982	17.2161	20.3297	22.3443	19.4139	19.7802	22.3443	24.5421	20.5128	21.0623	24.7253	26.3736	22.3443	22.8938	26.3736	29.8535	22.7106	24.359	27.6557	31.685	24.1758	26.7399	30.5861	33.5165
segment 43	nose (II)	4.21245	3.47985	4.0293	4.94505	6.41026	6.04396	6.77656	8.42491	9.52381	7.87546	9.70696	11.9048	10.8059	9.89011	12.8205	15.3846	13.0037	12.4542	16.1172	20.696	14.1026	13.5531	18.4982	22.8938	15.0183	15.3846	21.7949	26.1905	15.3846	16.4835	24.5421	29.304	17.3993	19.4139	26.3736	31.1355	20.3297	21.0623	29.4872	32.6007	21.6117	23.4432	30.5861	34.4322	22.7106	24.9084	31.8681	35.348
segment 44	nose (II)	5.12821	6.22711	5.31136	7.50916	7.14286	8.79121	9.52381	11.7216	9.52381	11.5385	13.0037	16.3004	11.5385	14.8352	15.3846	18.315	15.3846	17.3993	18.8645	23.0769	17.9487	19.0476	21.6117	24.9084	19.7802	21.6117	22.7106	27.2894	21.4286	23.4432	23.8095	28.9377	23.0769	26.1905	25.2747	31.5018	25.641	29.1209	27.4725	33.6996	26.9231	30.9524	28.3883	35.5311	29.6703	32.2344	30.7692	37.3626
segment 45	nose (II)	3.47985	3.11355	6.04396	5.86081	8.24176	7.32601	8.97436	9.15751	10.989	11.7216	13.0037	13.1868	13.5531	14.4689	15.2015	17.7656	16.3004	17.3993	19.0476	22.7106	18.6813	20.1465	20.5128	26.0073	20.696	21.4286	22.7106	28.3883	22.7106	23.4432	24.5421	31.685	24.1758	26.1905	28.3883	34.0659	26.3736	28.2051	30.7692	36.2637	28.5714	30.4029	32.7839	38.0952	30.5861	32.0513	34.4322	40.6593
segment 46	nose (II)	2.01465	2.38095	2.5641	2.74725	3.47985	3.84615	5.12821	5.67766	5.49451	5.12821	6.41026	6.95971	8.24176	6.59341	7.69231	8.60806	10.0733	9.15751	9.15751	10.2564	11.9048	11.3553	10.4396	12.4542	14.2857	13.1868	11.5385	13.9194	15.9341	15.2015	14.2857	15.9341	17.7656	17.3993	15.5678	17.2161	19.7802	19.4139	17.2161	17.7656	21.2454	20.696	18.1319	20.1465	21.6117	22.7106	19.2308	23.0769
segment 47	nose (II)	2.74725	1.64835	1.8315	2.01465	4.57875	4.7619	5.12821	5.67766	6.95971	6.04396	7.87546	7.50916	9.15751	7.87546	9.52381	9.34066	11.5385	9.89011	13.0037	12.8205	12.8205	12.6374	14.2857	15.9341	15.3846	15.3846	17.2161	18.8645	16.6667	16.6667	19.4139	21.2454	19.9634	19.2308	21.7949	23.4432	21.0623	20.696	23.6264	24.9084	22.5275	22.8938	25.4579	26.9231	24.1758	24.5421	26.5568	30.0366
segment 48	lower face (III)	5.12821	5.31136	4.0293	4.3956	8.05861	7.87546	7.50916	7.32601	10.2564	10.0733	9.52381	10.989	13.5531	13.5531	11.3553	13.37	17.033	16.4835	13.7363	15.3846	18.315	18.4982	15.0183	17.9487	19.5971	21.6117	17.033	20.1465	21.2454	24.7253	18.8645	22.8938	23.4432	26.9231	22.1612	25.2747	26.1905	30.0366	23.8095	26.0073	28.022	31.8681	25.8242	28.3883	29.4872	32.967	28.2051	30.7692
segment 49	lower face (III)	4.3956	5.31136	2.5641	3.84615	8.42491	8.79121	5.67766	8.24176	10.6227	11.9048	8.24176	10.8059	13.37	14.4689	11.5385	12.8205	16.3004	17.3993	15.7509	15.3846	18.315	19.5971	16.8498	18.315	20.3297	22.7106	18.4982	20.3297	22.7106	24.5421	20.696	21.0623	24.7253	27.6557	23.0769	22.7106	27.2894	30.9524	25.2747	26.0073	29.304	32.0513	25.8242	28.2051	31.3187	33.6996	27.8388	29.8535
segment 50	lower face (III)	4.0293	5.12821	4.21245	4.7619	6.22711	8.24176	6.22711	6.95971	7.69231	9.52381	9.15751	8.97436	9.89011	11.3553	11.1722	11.5385	13.5531	14.2857	12.4542	13.7363	16.4835	16.6667	14.4689	15.2015	18.8645	18.6813	16.1172	16.6667	20.5128	20.3297	18.1319	18.315	22.5275	23.0769	19.7802	21.2454	23.6264	25.0916	21.4286	22.5275	24.7253	27.1062	22.3443	23.8095	25.8242	28.5714	23.4432	25.2747
segment 51	lower face (III)	2.38095	3.11355	4.94505	5.31136	5.67766	6.22711	7.87546	9.89011	8.24176	8.60806	11.3553	13.5531	10.989	11.1722	13.5531	18.1319	14.4689	15.0183	18.1319	22.7106	16.3004	17.7656	21.6117	27.4725	18.8645	20.1465	24.5421	30.2198	20.5128	21.4286	26.7399	31.685	23.4432	24.1758	29.1209	34.6154	24.7253	25.4579	30.9524	37.7289	26.9231	27.2894	32.6007	39.3773	29.304	29.304	35.1648	41.7582
segment 52	lower face (III)	2.01465	4.21245	4.94505	5.12821	5.12821	6.59341	6.77656	8.24176	7.69231	7.69231	8.24176	10.989	8.79121	9.52381	10.0733	12.6374	10.4396	12.4542	12.2711	14.8352	11.7216	14.8352	12.8205	16.4835	13.0037	15.3846	15.0183	17.5824	13.7363	16.8498	16.4835	19.0476	15.7509	19.0476	19.2308	20.696	16.4835	19.4139	20.696	23.0769	17.7656	21.2454	21.978	24.359	20.3297	22.7106	23.0769	26.1905
segment 53	lower face (III)	2.74725	4.21245	3.84615	4.3956	6.41026	6.77656	7.50916	8.79121	8.97436	10.0733	10.2564	11.3553	11.9048	12.2711	12.6374	14.2857	14.2857	15.2015	14.8352	17.9487	15.9341	16.6667	17.2161	20.3297	17.2161	17.9487	18.4982	23.0769	19.4139	19.7802	20.696	24.9084	21.0623	21.2454	23.6264	26.0073	22.1612	23.6264	26.3736	27.8388	24.359	25.0916	27.2894	29.1209	25.641	26.9231	28.2051	30.4029
segment 54	lower face (III)	4.3956	4.3956	2.1978	3.84615	7.87546	8.05861	5.12821	5.31136	9.89011	10.4396	6.95971	8.05861	12.8205	13.1868	8.97436	9.34066	15.7509	15.5678	10.8059	11.9048	17.5824	17.033	12.0879	13.1868	18.4982	18.1319	14.2857	15.7509	19.5971	19.7802	15.7509	17.2161	22.5275	21.2454	17.9487	18.315	23.2601	23.0769	20.8791	20.5128	24.5421	23.6264	23.0769	22.5275	25.4579	25.641	23.8095	25.2747
segment 55	lower face (III)	3.47985	4.57875	2.5641	3.663	6.04396	6.41026	4.57875	6.95971	8.24176	7.69231	6.95971	9.70696	10.2564	9.70696	8.24176	12.2711	11.7216	12.0879	10.0733	14.8352	14.1026	14.2857	12.0879	16.1172	15.7509	16.4835	14.1026	17.5824	18.315	18.6813	16.1172	18.315	19.2308	19.5971	18.4982	19.2308	21.0623	22.5275	19.7802	20.1465	22.8938	23.9927	20.5128	21.4286	24.1758	25.8242	23.0769	22.1612
segment 56	upper face (IV)	4.57875	6.22711	4.0293	5.12821	8.60806	8.60806	7.87546	8.42491	12.2711	10.989	10.8059	11.7216	15.0183	14.2857	12.2711	14.8352	18.315	19.2308	15.2015	17.9487	20.696	19.9634	16.8498	20.3297	22.8938	22.5275	19.0476	23.8095	25.2747	24.7253	21.2454	24.7253	26.9231	26.9231	23.9927	27.6557	27.4725	28.7546	24.7253	29.8535	28.9377	30.4029	26.0073	30.7692	31.1355	32.0513	27.6557	31.685
segment 57	upper face (IV)	2.74725	2.5641	3.2967	4.3956	5.12821	6.41026	6.41026	5.86081	7.32601	9.70696	7.14286	8.42491	9.52381	13.1868	8.97436	10.6227	12.6374	15.7509	12.0879	14.8352	15.0183	18.315	14.2857	17.5824	17.033	20.696	15.0183	18.6813	18.8645	22.8938	17.2161	21.0623	22.7106	26.1905	20.696	23.2601	25.0916	27.6557	23.0769	25.0916	26.9231	29.6703	24.5421	26.9231	28.7546	30.9524	26.1905	29.1209
segment 58	upper face (IV)	4.3956	6.41026	7.14286	7.14286	9.34066	10.2564	10.6227	12.6374	11.5385	13.37	14.1026	16.3004	14.4689	17.5824	17.5824	19.2308	17.7656	20.5128	20.8791	22.1612	21.0623	22.1612	22.7106	25.4579	22.7106	25.4579	25.641	29.1209	24.5421	27.4725	27.1062	31.5018	26.3736	30.0366	29.8535	34.0659	28.7546	31.5018	31.3187	36.8132	30.7692	34.4322	32.7839	38.2784	32.0513	36.4469	36.63	40.1099
segment 59	upper face (IV)	6.95971	8.60806	6.77656	8.24176	11.5385	12.2711	12.2711	15.7509	14.8352	16.3004	15.5678	19.0476	18.315	19.9634	19.5971	21.6117	21.0623	24.1758	23.6264	25.8242	23.0769	27.1062	25.0916	28.9377	25.4579	29.6703	27.6557	33.1502	27.8388	32.0513	30.9524	35.348	30.0366	34.7985	33.5165	38.2784	32.2344	36.8132	35.8974	39.5604	34.6154	38.4615	36.9963	41.7582	36.63	39.3773	39.1941	43.7729
segment 60	upper face (IV)	6.95971	8.05861	9.70696	13.0037	10.6227	13.0037	13.7363	18.1319	13.5531	17.7656	17.5824	21.4286	15.9341	21.2454	19.9634	24.359	20.1465	24.9084	24.1758	29.4872	22.8938	27.8388	28.5714	33.1502	25.4579	29.4872	32.0513	36.9963	28.022	32.2344	33.6996	39.5604	30.5861	34.7985	36.4469	42.674	33.5165	36.4469	38.4615	44.8718	35.7143	38.8278	40.6593	46.5201	37.3626	39.9267	41.3919	47.9853
segment 61	upper face (IV)	7.50916	7.50916	6.22711	7.50916	13.5531	12.2711	10.989	11.5385	17.5824	16.3004	14.4689	15.9341	20.696	19.2308	16.8498	21.6117	22.8938	25.2747	21.0623	26.3736	25.8242	29.1209	24.359	29.8535	28.7546	30.2198	28.3883	35.1648	29.8535	33.1502	32.2344	36.8132	32.6007	34.9817	34.4322	38.8278	34.6154	37.7289	37.3626	41.9414	36.4469	40.1099	39.7436	43.4066	38.8278	41.7582	41.7582	45.6044
segment 62	upper face (IV)	3.84615	4.57875	4.21245	7.14286	7.50916	8.05861	8.79121	11.9048	9.70696	11.7216	11.1722	15.0183	12.4542	14.1026	14.4689	18.8645	14.8352	17.033	17.033	22.7106	17.2161	19.4139	20.696	25.0916	19.9634	21.978	24.359	27.4725	22.3443	23.9927	26.9231	30.5861	24.5421	25.8242	28.3883	32.7839	26.9231	28.5714	30.2198	34.9817	28.3883	30.7692	31.8681	36.8132	29.6703	32.967	33.5165	38.8278
segment 63	upper face (IV)	4.3956	4.94505	5.49451	6.41026	9.52381	7.69231	8.79121	10.6227	13.7363	11.7216	10.989	12.6374	17.2161	15.3846	13.1868	16.3004	19.9634	19.5971	15.7509	18.4982	22.3443	21.978	17.033	20.3297	26.1905	25.4579	18.8645	22.7106	28.2051	28.3883	20.8791	23.9927	30.5861	32.0513	23.6264	24.9084	32.967	34.7985	24.9084	26.5568	34.2491	36.4469	26.9231	28.9377	36.4469	39.1941	28.7546	30.0366
[truncated: 352 more columns]
