# Supplementary material for: 3D facial phenotyping by biometric sibling matching used in contemporary genomic methodologies
Source: PLoS Genet. 2021 May 13;17(5):e1009528. doi: 10.1371/journal.pgen.1009528 (PMC8118281; doi:10.1371/journal.pgen.1009528)
Supplement: S8 Table — Rg, genetic correlation; SE, standard error. (XLSX) [file pgen.1009528.s022.xlsx]

## Sheet: S8 Table
S8 Table. Genetic correlation between sib-shared traits and non-facial traits and diseases. Rg, genetic correlation; SE, standard error.
			HEART															BRAIN																											NEURODEVELOPMENTAL
			Systolic Blood Pressure			Pulse Rate			Congenital Malformation of Cardiac Septa			Hypertension			Cardiomyopathy			Accumbens			Amygdala			Brainstem			Putamen			Pallidum			Thalamus			Caudate			Intercranium			Hippocampus			Parkinson's Disease			Epilepsy
Trait Index	Segment	Quadrant	Rg	SE	P-value	Rg	SE	P-value	Rg	SE	P-value	Rg	SE	P-value	Rg	SE	P-value	Rg	SE	P-value	Rg	SE	P-value	Rg	SE	P-value	Rg	SE	P-value	Rg	SE	P-value	Rg	SE	P-value	Rg	SE	P-value	Rg	SE	P-value	Rg	SE	P-value	Rg	SE	P-value	Rg	SE
1	1	full face (1)	0.0244	0.0718	0.7342	-0.0451	0.0816	0.5808	0.2824	0.6652	0.6711	0.0449	0.0741	0.5443	0.5369	0.2816	0.0566	0.0296	0.1084	0.7849	-0.1917	0.1627	0.2387	0.068	0.1078	0.5284	0.0057	0.0994	0.9543	0.0922	0.1434	0.5203	0.057	0.1103	0.6052	-0.0893	0.1112	0.4218	0.1084	0.1155	0.3478	0.1292	0.1479	0.3824	-0.4812	0.3882	0.2151	-0.2873	0.5551
2	1	full face (1)	-0.0119	0.0786	0.8801	-0.0551	0.1085	0.6116	0.3442	0.8299	0.6783	0.0343	0.0823	0.6773	0.5526	0.3501	0.1145	0.0837	0.1367	0.5404	-0.1083	0.1981	0.5845	0.031	0.1339	0.8167	0.0747	0.1262	0.5537	-0.0118	0.1516	0.9382	-0.1771	0.1458	0.2246	0.0498	0.125	0.6906	0.1307	0.1586	0.4099	0.1711	0.1723	0.3205	-0.2919	0.4591	0.525	-0.435	0.6687
3	1	full face (1)	0.0303	0.0714	0.671	-0.059	0.0976	0.5455	0.5116	0.8602	0.552	0.0771	0.0724	0.2873	0.812	0.3481	0.0197	0.0463	0.1208	0.7016	-0.143	0.1862	0.4426	-0.013	0.1139	0.9091	0.1339	0.1119	0.2315	0.1077	0.1435	0.4532	-0.0477	0.1291	0.7118	0.0334	0.1156	0.7727	0.1009	0.1377	0.4638	0.2037	0.1628	0.2108	-0.0499	0.4315	0.908	-0.4773	0.6488
4	1	full face (1)	0.1116	0.0647	0.0844	-0.0804	0.0893	0.3681	1.221	1.5	0.4157	0.0723	0.0625	0.2474	0.4583	0.2813	0.1033	0.1207	0.1104	0.2741	-0.1543	0.1666	0.3545	0.0613	0.1064	0.5644	0.0499	0.1001	0.6182	0.083	0.13	0.5232	-0.0588	0.1182	0.619	0.0452	0.1037	0.6632	0.0167	0.1215	0.8905	0.1967	0.1436	0.1709	0.1028	0.3264	0.7527	-0.6258	0.684
5	1	full face (1)	0.0622	0.0725	0.3908	-0.0543	0.0793	0.4936	0.1488	0.6512	0.8193	0.0571	0.0774	0.4611	0.5107	0.2853	0.0734	-0.0716	0.1112	0.5195	-0.048	0.1607	0.7651	0.0394	0.109	0.7179	0.0384	0.0966	0.6906	0.1395	0.1471	0.343	0.0565	0.113	0.6174	-0.1134	0.1044	0.2771	0.2233	0.1191	0.0608	0.159	0.1525	0.2973	-0.6625	0.4613	0.151	-0.5514	0.7125
6	1	full face (1)	0.0293	0.0702	0.6762	-0.0603	0.0964	0.5319	0.1497	0.7102	0.8331	0.0434	0.0743	0.5589	0.4445	0.3024	0.1416	-0.0254	0.1198	0.8325	0.0473	0.1765	0.7887	-0.0035	0.1125	0.9755	0.0978	0.1103	0.3753	0.0366	0.1379	0.7904	-0.1582	0.1336	0.2365	0.0209	0.1051	0.8423	0.2212	0.1415	0.1179	0.1751	0.1523	0.2503	-0.4422	0.4643	0.3409	-0.6556	0.7323
7	1	full face (1)	0.1613	0.0717	0.0246	-0.0989	0.0965	0.3055	1.2074	1.5199	0.427	0.091	0.0656	0.1656	0.4649	0.2925	0.1119	0.0331	0.1164	0.7764	-0.0245	0.1759	0.8891	0.0351	0.113	0.7558	0.0883	0.1044	0.3978	0.1385	0.141	0.326	-0.0707	0.1239	0.5682	0.0272	0.1068	0.799	0.1362	0.1317	0.3012	0.2455	0.1588	0.1222	-0.0727	0.3779	0.8475	-0.9662	0.9369
8	1	full face (1)	-0.0566	0.0621	0.3617	-0.1269	0.0907	0.1619	-0.0083	0.6847	0.9904	-0.1148	0.0607	0.0586	-0.3891	0.2777	0.1612	0.0773	0.1257	0.5389	0.164	0.1567	0.2954	-0.0845	0.1173	0.4711	0.0831	0.0937	0.3747	-0.1181	0.1376	0.3906	-0.0133	0.1242	0.9147	-0.0204	0.1038	0.8446	-0.3008	0.1141	0.0084	-0.162	0.1544	0.294	-0.0408	0.3491	0.907	0.1931	0.5877
9	1	full face (1)	-0.0359	0.0843	0.6705	0.0937	0.0899	0.2975	-0.6685	0.9639	0.488	-0.0652	0.0956	0.4952	0.0023	0.288	0.9937	0.1402	0.1338	0.2948	-0.1206	0.1676	0.4719	0.1229	0.1307	0.3472	0.1251	0.1061	0.2385	0.0599	0.1737	0.7302	-0.0608	0.1369	0.6569	0.0692	0.1388	0.6181	-0.0581	0.13	0.6551	-0.0967	0.1775	0.5859	-0.1836	0.3527	0.6027	-0.6032	0.6848
10	1	full face (1)	0.0561	0.0673	0.4046	-0.0281	0.0747	0.7073	0.0994	0.568	0.8611	0.0148	0.063	0.814	0.0344	0.2538	0.8923	-0.0753	0.1144	0.5104	-0.3072	0.143	0.0316	0.0017	0.0937	0.9854	-0.0152	0.0923	0.869	-0.0424	0.1197	0.7234	-0.0221	0.0981	0.8214	-0.0807	0.0888	0.3636	-0.1648	0.0988	0.0951	0.0281	0.1325	0.8323	-0.357	0.3668	0.3303	-0.9421	0.883
11	1	full face (1)	-0.0207	0.061	0.7346	-0.1209	0.096	0.2078	1.0417	1.3471	0.4394	-0.0646	0.0698	0.3553	0.1821	0.2739	0.5062	0.0627	0.1147	0.5849	-0.0861	0.1515	0.5699	0.0148	0.1133	0.8958	0.0409	0.1024	0.6895	0.1868	0.1305	0.1523	0.0946	0.1198	0.4299	0.0017	0.0937	0.9856	-0.3025	0.1192	0.0112	-0.1928	0.1533	0.2085	0.4051	0.3569	0.2564	-0.3925	0.6416
12	1	full face (1)	-0.0146	0.0602	0.8085	0.066	0.0877	0.4521	-0.093	0.6894	0.8927	-0.0036	0.0673	0.9571	0.0193	0.2852	0.946	0.001	0.1204	0.9932	-0.0886	0.1602	0.5802	0.1276	0.1084	0.2392	-0.0195	0.105	0.8523	-0.2299	0.1284	0.0735	-0.1112	0.1257	0.3763	-0.1787	0.1226	0.1448	0.1001	0.1304	0.443	0.1398	0.1595	0.381	0.058	0.3697	0.8754	0.4098	0.6719
13	1	full face (1)	0.0478	0.0667	0.474	0.0778	0.0822	0.3438	-0.7068	1.1536	0.5401	0.0705	0.069	0.3066	-0.2309	0.2673	0.3876	-0.1008	0.1184	0.3946	-0.0062	0.1533	0.9676	-0.0485	0.1079	0.653	-0.0016	0.0972	0.9868	0.0443	0.1338	0.7406	-0.1415	0.1375	0.3033	0.0342	0.1116	0.7595	0.1604	0.1326	0.2263	-0.2244	0.1523	0.1408	0.0467	0.361	0.897	1.1706	1.1108
14	1	full face (1)	0.0661	0.0687	0.3359	0.0299	0.0798	0.7079	-0.6242	1.0984	0.5698	0.0457	0.0704	0.5165	-0.226	0.2922	0.4392	-0.2639	0.1379	0.0557	-0.1462	0.1683	0.385	-0.1106	0.1233	0.3698	-0.0844	0.1058	0.425	0.0572	0.1296	0.6589	-0.1912	0.139	0.169	-0.0297	0.1147	0.7955	0.1077	0.1433	0.4525	-0.187	0.1621	0.2487	-0.0406	0.369	0.9123	1.079	1.0428
15	1	full face (1)	0.137	0.0533	0.0101	-0.2037	0.0746	0.0063	-0.3121	0.6335	0.6223	0.0188	0.0529	0.7221	-0.434	0.2743	0.1136	0.0841	0.094	0.3708	0.2022	0.1317	0.1247	-0.0133	0.0868	0.878	-0.0221	0.0736	0.7644	-0.1396	0.1185	0.2386	-0.2295	0.1035	0.0265	-0.0205	0.0905	0.821	0.0572	0.1011	0.5715	0.0667	0.1237	0.5895	0.1172	0.2688	0.6628	0.4862	0.6238
16	1	full face (1)	0.0143	0.0613	0.8159	-0.1295	0.0814	0.1119	0.2659	0.6575	0.6859	0.085	0.0643	0.1858	0.185	0.2425	0.4455	0.103	0.1205	0.3927	0.1061	0.1494	0.4775	-0.0784	0.0934	0.4016	0.0832	0.0873	0.3408	-0.0402	0.122	0.742	0.1954	0.1066	0.0669	-0.0312	0.0906	0.7302	-0.3519	0.1236	0.0044	-0.0707	0.1459	0.6281	0.5269	0.3885	0.175	-0.0955	0.4598
17	1	full face (1)	-0.053	0.0706	0.453	0.066	0.0998	0.5083	-0.1703	0.6916	0.8055	-0.0571	0.0758	0.4519	-0.8206	0.3912	0.0359	-0.039	0.1159	0.7364	0.0763	0.1475	0.6051	0.1147	0.111	0.3017	-0.1174	0.0979	0.2307	-0.2029	0.1223	0.097	-0.0385	0.1239	0.7558	0.0335	0.1012	0.7403	0.2173	0.1434	0.1297	-0.0862	0.1514	0.5691	-0.1135	0.4333	0.7934	0.4635	0.6339
18	1	full face (1)	-0.0634	0.0661	0.3372	-0.0933	0.1009	0.3555	0.0122	0.743	0.9869	0.0077	0.0708	0.9136	0.4012	0.3344	0.2301	0.158	0.1289	0.2201	0.0532	0.1808	0.7686	-0.0342	0.1234	0.7819	0.3456	0.1382	0.0124	0.2666	0.1586	0.0928	0.1974	0.1372	0.1502	0.2513	0.1273	0.0483	-0.1121	0.1246	0.3685	0.236	0.157	0.1328	-0.0032	0.3746	0.9932	-0.0806	0.6063
19	1	full face (1)	-0.0326	0.0747	0.6627	-0.029	0.0967	0.7642	0.1173	0.7766	0.8799	0.0535	0.0732	0.4647	0.4257	0.354	0.2291	-0.1144	0.1552	0.4611	0.0058	0.1829	0.9748	0.0135	0.1172	0.9082	0.0986	0.1155	0.3935	0.0576	0.1442	0.6894	0.1755	0.1473	0.2336	0.0356	0.1167	0.7603	0.1988	0.1303	0.127	0.0349	0.1739	0.8409	0.0832	0.4211	0.8435	-0.5827	0.7608
20	1	full face (1)	-0.1725	0.0784	0.0279	0.0633	0.0933	0.4976	-0.0377	0.5786	0.9481	-0.1761	0.0775	0.023	0.0962	0.267	0.7187	0.0671	0.1282	0.6008	-0.2368	0.1569	0.1313	-0.0516	0.1218	0.6717	0.0119	0.1011	0.9063	0.0364	0.1484	0.8062	0.05	0.1021	0.6247	-0.0242	0.112	0.8289	0.095	0.1226	0.4386	-0.2312	0.1405	0.0997	0.438	0.4002	0.2738	0.2999	0.5777
21	1	full face (1)	0.0514	0.0533	0.3356	0.0092	0.0739	0.9005	0.3898	0.7242	0.5904	0.0338	0.0573	0.5555	0.4717	0.2653	0.0754	-0.2099	0.1019	0.0394	-0.2799	0.1431	0.0504	-0.1597	0.0933	0.0871	-0.1309	0.0722	0.0697	-0.0696	0.104	0.5035	-0.1773	0.1031	0.0856	-0.1794	0.0849	0.0346	0.1359	0.1003	0.1755	0.0177	0.1186	0.881	0.194	0.3067	0.527	-0.8329	0.8335
22	1	full face (1)	-0.0377	0.0801	0.6379	-0.051	0.0691	0.4605	-0.0921	0.5739	0.8725	-0.0441	0.081	0.5859	0.2143	0.231	0.3535	0.046	0.1058	0.6636	-0.0791	0.1326	0.5506	0.0912	0.0976	0.3502	-0.1248	0.0788	0.1135	0.0094	0.1516	0.9508	0.0239	0.0977	0.8067	-0.0945	0.0923	0.306	-0.0223	0.1078	0.8362	-0.2739	0.1366	0.0449	0.5007	0.3925	0.2021	-0.0096	0.4578
23	1	full face (1)	-0.0657	0.0508	0.1956	-0.0472	0.0697	0.4986	0.0703	0.5278	0.8941	-0.1155	0.0566	0.0414	0.1413	0.2404	0.5567	0.1767	0.1036	0.0881	-0.0063	0.1266	0.9603	-0.0084	0.0877	0.924	-0.0322	0.0892	0.718	-0.0846	0.1066	0.4275	-0.1952	0.095	0.0399	0.0995	0.0835	0.2332	0.0291	0.0955	0.7609	0.0414	0.1427	0.7716	-0.3087	0.3385	0.3618	-0.9622	0.9233
24	1	full face (1)	-0.2412	0.1448	0.0957	0.2839	0.2098	0.1759	-0.1418	1.0442	0.892	-0.2066	0.1362	0.1295	-0.3823	0.4862	0.4318	-0.0843	0.198	0.6703	-0.3726	0.316	0.2383	0.0387	0.1788	0.8285	-0.0865	0.1622	0.5938	0.0317	0.2328	0.8916	-0.1096	0.1966	0.5771	0.0201	0.1669	0.9042	-0.1122	0.2055	0.5851	-0.2057	0.2548	0.4196	-0.518	0.6973	0.4576	-0.0155	0.8283
25	1	full face (1)	-0.1795	0.0629	0.0043	-0.0255	0.0796	0.7485	0.2584	0.6212	0.6774	-0.1795	0.0694	0.0097	-0.1248	0.2389	0.6014	0.0051	0.1125	0.9636	-0.2167	0.1467	0.1396	-0.0111	0.0943	0.9064	0.0116	0.0954	0.9037	0.0735	0.1227	0.5491	-0.0315	0.1097	0.774	-0.0147	0.0945	0.876	0.0228	0.1096	0.8354	-0.163	0.1336	0.2224	-0.1073	0.334	0.7479	-0.0711	0.5201
26	1	full face (1)	0.0806	0.0633	0.2031	0.1007	0.0884	0.255	-0.2528	0.7046	0.7198	0.0926	0.0635	0.1445	-0.4941	0.3005	0.1001	-0.0859	0.1049	0.4128	0.2134	0.1586	0.1787	0.0901	0.1015	0.3745	-0.026	0.1006	0.7964	0.0713	0.1185	0.5472	0.028	0.1124	0.8029	-0.0278	0.1019	0.7851	0.2852	0.1254	0.0229	-0.1977	0.1401	0.1583	-0.0718	0.3704	0.8462	-0.0753	0.5316
27	1	full face (1)	-0.1059	0.0596	0.0757	0.0449	0.0823	0.5856	-0.3474	0.7447	0.6409	-0.0294	0.0631	0.6407	0.5531	0.3395	0.1033	0.1445	0.1212	0.2331	-0.0285	0.1655	0.8635	-0.1548	0.1012	0.1261	0.1414	0.106	0.1823	0.0856	0.1353	0.527	0.1239	0.1289	0.3367	0.1001	0.1086	0.3566	-0.1574	0.1221	0.1975	0.0246	0.1516	0.871	0.1687	0.3707	0.649	-0.2697	0.5193
28	1	full face (1)	0.0272	0.061	0.6553	0.0308	0.0655	0.6389	0.4131	0.7303	0.5716	-0.023	0.0719	0.7491	-0.1166	0.2222	0.5999	0.0156	0.1095	0.8866	0.264	0.1498	0.078	-0.0037	0.1038	0.9713	0.0323	0.0884	0.7151	0.0191	0.1466	0.8964	0.0949	0.1029	0.3563	0.0521	0.0909	0.5661	-0.068	0.1038	0.5125	-0.0629	0.1361	0.6441	0.469	0.3631	0.1965	0.0928	0.4441
29	1	full face (1)	0.0321	0.0553	0.5619	-0.0801	0.0857	0.3497	0.1444	0.6394	0.8213	0.0083	0.0574	0.8856	0.0372	0.2935	0.8991	-0.0455	0.119	0.7019	0.1539	0.1522	0.312	0.1316	0.1119	0.2394	0.0907	0.1062	0.3932	0.0216	0.139	0.8766	0.1429	0.1134	0.2076	-0.0933	0.1049	0.3737	0.0059	0.1164	0.9597	0.1208	0.1566	0.4404	-0.032	0.3262	0.9219	-0.3188	0.5775
30	1	full face (1)	-0.0553	0.114	0.6275	-0.0588	0.1292	0.6491	-0.0109	0.9862	0.9912	-0.118	0.1304	0.3657	0.1233	0.4571	0.7874	0.2687	0.2196	0.221	0.1976	0.2544	0.4374	0.1828	0.1937	0.3453	0.097	0.1723	0.5736	0.1008	0.2384	0.6726	0.2587	0.232	0.2648	-0.1269	0.1711	0.4584	-0.0068	0.1985	0.9727	-0.0465	0.2357	0.8436	0.2928	0.5246	0.5767	-0.3666	0.9579
31	1	full face (1)	0.0582	0.0588	0.3224	-0.003	0.0767	0.969	0.4368	0.7279	0.5485	0.0473	0.0636	0.4576	0.0913	0.2637	0.7292	0.0427	0.1025	0.677	0.0072	0.1481	0.9614	-0.0266	0.0902	0.7685	0.1142	0.0898	0.2033	0.1178	0.1353	0.3842	0.0172	0.098	0.8607	-0.0358	0.1013	0.7242	-0.2298	0.1002	0.0218	0.1383	0.1351	0.3061	-0.0357	0.2859	0.9006	-0.407	0.5543
32	1	full face (1)	0.0794	0.0546	0.1459	-0.1574	0.0799	0.0489	0.217	0.5907	0.7134	0.0005	0.0558	0.9932	-0.0755	0.2367	0.7497	-0.0367	0.0978	0.7078	0.043	0.1387	0.7568	-0.0588	0.0835	0.4813	-0.0075	0.0895	0.9332	-0.0606	0.1082	0.5757	0.0715	0.1073	0.5053	0.0229	0.0861	0.7899	-0.1436	0.1079	0.1834	0.1339	0.1225	0.2746	0.0854	0.2961	0.7731	-0.4697	0.582
33	1	full face (1)	-0.008	0.061	0.8959	-0.0172	0.0823	0.8341	-0.7577	1.0855	0.4852	0.1018	0.0671	0.1293	-0.0874	0.2565	0.7333	-0.1033	0.1361	0.4479	-0.073	0.1565	0.6411	-0.0306	0.0961	0.7505	-0.0306	0.1073	0.7755	0.0993	0.1286	0.4399	-0.0643	0.1201	0.5927	-0.0464	0.1096	0.6717	-0.0992	0.1124	0.3775	0.0896	0.1448	0.5361	-0.2241	0.3579	0.5313	-0.5835	0.7142
34	1	full face (1)	-0.0912	0.0587	0.1202	0.0179	0.0762	0.8143	-0.8425	1.1702	0.4716	-0.0077	0.0578	0.894	0.1534	0.2474	0.5354	-0.2169	0.1316	0.0995	-0.244	0.1481	0.0994	0.0185	0.0907	0.8386	-0.017	0.0969	0.8608	0.1397	0.1274	0.2731	-0.0216	0.1204	0.8576	-0.0077	0.1027	0.9403	-0.0087	0.0995	0.93	0.0982	0.1467	0.5034	-0.5907	0.3903	0.1302	-0.09	0.4725
35	1	full face (1)	-0.006	0.0598	0.9195	-0.0422	0.0746	0.572	-0.3743	0.6805	0.5823	0.0931	0.0665	0.1616	0.0913	0.2533	0.7185	0.109	0.1132	0.3357	0.0047	0.146	0.9744	-0.0568	0.0935	0.5437	-0.0103	0.093	0.9114	-0.0266	0.1236	0.8294	0.0027	0.1039	0.979	-0.0244	0.1013	0.8092	-0.2309	0.1125	0.0401	0.2103	0.1349	0.119	0.3117	0.3585	0.3846	-0.3121	0.5205
36	1	full face (1)	0.0041	0.0503	0.9354	-0.0046	0.0683	0.9458	0.0216	0.5546	0.969	-0.0238	0.0529	0.6531	0.1595	0.2416	0.5092	0.1098	0.0997	0.2705	0.0725	0.1277	0.57	0.0488	0.0991	0.622	0.1689	0.089	0.0578	0.112	0.1011	0.2682	0.0273	0.1025	0.7901	0.1177	0.0898	0.1898	0.0238	0.109	0.827	0.0647	0.1198	0.589	-0.0693	0.2738	0.8001	-0.1865	0.486
37	1	full face (1)	-0.0589	0.0652	0.3659	0.0416	0.0923	0.6522	0.3363	0.7682	0.6616	-0.0197	0.0681	0.7726	0.0354	0.248	0.8865	-0.0676	0.1257	0.5909	-0.0839	0.1598	0.5994	-0.0047	0.0995	0.9621	-0.0056	0.0984	0.9548	0.016	0.1148	0.8888	-0.008	0.125	0.9492	-0.0812	0.0943	0.3893	0.2617	0.1238	0.0345	0.1296	0.147	0.3782	-0.2656	0.3893	0.495	-0.8281	0.8234
38	1	full face (1)	0.0128	0.0569	0.822	-0.0489	0.069	0.4786	-0.0391	0.5632	0.9447	0.1067	0.0573	0.0628	-0.0175	0.2375	0.9412	-0.0118	0.1009	0.9072	-0.0082	0.1369	0.9522	0.0747	0.092	0.417	0.1377	0.0958	0.1503	0.0315	0.1247	0.8005	0.0568	0.117	0.6274	0.0286	0.0846	0.7353	0.1232	0.0952	0.1956	0.0784	0.1205	0.5153	0.0486	0.322	0.88	-0.174	0.5182
39	1	full face (1)	0.0254	0.0582	0.6626	-0.0025	0.0833	0.9764	0.385	0.7693	0.6167	-0.0394	0.0687	0.5662	-0.0174	0.2721	0.9491	0.0384	0.1274	0.7632	-0.1324	0.1745	0.4479	0.0567	0.1138	0.6182	-0.0267	0.1089	0.8064	0.1599	0.1247	0.1996	-0.0191	0.1268	0.8802	-0.0048	0.0993	0.9615	-0.0742	0.125	0.5529	0.0658	0.1461	0.6523	-0.2978	0.3531	0.399	0.4918	0.7151
40	1	full face (1)	0.2087	0.0975	0.0323	0.036	0.0927	0.6973	-0.0201	0.7902	0.9797	0.1135	0.0974	0.2443	0.2498	0.3358	0.4569	-0.0652	0.1455	0.6539	-0.0961	0.1857	0.6047	0.0819	0.1343	0.5419	0.0367	0.1192	0.7583	0.125	0.1746	0.4742	-0.0724	0.1314	0.5815	0.0861	0.1126	0.4447	-0.2503	0.1572	0.1113	-0.0269	0.1636	0.8694	-0.483	0.4425	0.2751	0.1455	0.5983
41	1	full face (1)	0.0466	0.0581	0.4225	0.0067	0.0803	0.9333	0.3254	0.6641	0.6241	0.0247	0.0584	0.6716	-0.1588	0.243	0.5134	0.3261	0.1087	0.0027	0.1299	0.1469	0.3765	-0.0569	0.0845	0.5007	-0.0048	0.0813	0.9526	-0.0207	0.1233	0.8667	-0.0444	0.0999	0.657	0.0286	0.1022	0.78	-0.0605	0.1027	0.5558	0.027	0.1373	0.8441	-0.1666	0.3054	0.5854	-0.0698	0.4937
42	1	full face (1)	0.0663	0.0648	0.3061	0.0203	0.0839	0.8087	0.363	0.736	0.6219	0.0321	0.0672	0.6327	-0.0498	0.2841	0.8608	0.2189	0.1153	0.0576	0.2053	0.1782	0.2492	-0.0181	0.1058	0.8641	-0.016	0.1065	0.8807	-0.073	0.1417	0.6063	-0.0743	0.1156	0.5205	0.034	0.1046	0.745	0.0095	0.1155	0.9341	0.0017	0.1496	0.9909	-0.1018	0.3631	0.7792	0.2866	0.6117
43	1	full face (1)	0.1059	0.072	0.1414	0.0147	0.1003	0.8834	0.2961	0.7966	0.7101	0.1068	0.0837	0.202	-0.2573	0.3661	0.4821	0.0767	0.134	0.5669	0.2251	0.2065	0.2756	0.1139	0.1282	0.3743	-0.0969	0.1414	0.4935	-0.1004	0.1765	0.5696	0.0215	0.1473	0.8841	-0.014	0.1218	0.9083	0.1485	0.1392	0.2861	-0.0036	0.1617	0.9823	-0.1213	0.4311	0.7784	-0.4225	0.7495
44	1	full face (1)	0.0497	0.0609	0.4144	-0.0634	0.0965	0.5111	-0.0963	0.6163	0.8758	0.0491	0.0717	0.4937	-0.1842	0.32	0.5649	0.2421	0.1274	0.0574	0.2351	0.1858	0.2057	0.013	0.1076	0.904	-0.071	0.1045	0.4969	-0.0403	0.1468	0.7839	-0.058	0.1234	0.6384	-0.0559	0.1138	0.6229	-0.0153	0.1284	0.9053	0.0334	0.1519	0.8261	-0.2357	0.3756	0.5303	0.0365	0.6047
45	1	full face (1)	-0.063	0.0584	0.2806	-0.0797	0.0744	0.2839	0.702	1.0157	0.4894	-0.1458	0.0614	0.0175	0.0313	0.2735	0.9089	-0.0922	0.1123	0.4116	-0.0796	0.1562	0.6103	-0.1409	0.1043	0.177	-0.0251	0.0954	0.7922	0.0841	0.1134	0.4585	-0.0256	0.1186	0.8292	0.0311	0.093	0.7381	0.0192	0.1115	0.8635	-0.1465	0.134	0.2743	-0.1361	0.3088	0.6594	-0.2554	0.5378
46	1	full face (1)	-0.0548	0.0623	0.379	0.2416	0.078	0.002	-0.1507	0.5548	0.7859	-0.0366	0.0598	0.5405	-0.2473	0.2559	0.3337	-0.0566	0.1083	0.6014	0.1293	0.1504	0.39	0.1156	0.0896	0.1969	-0.0135	0.0921	0.8838	0.0977	0.1228	0.4261	0.0259	0.1012	0.7983	-0.0723	0.0957	0.4499	0.1862	0.1186	0.1164	-0.1497	0.128	0.2424	0.1851	0.3048	0.5437	0.1226	0.4248
47	1	full face (1)	-0.1041	0.0614	0.0901	0.1614	0.0848	0.0571	-0.2631	0.6533	0.6872	-0.0005	0.0555	0.9927	0.0882	0.2477	0.7217	0.0587	0.1077	0.5859	0.0866	0.1619	0.5927	0.016	0.0986	0.8713	0.1045	0.1011	0.301	0.11	0.1234	0.373	0.0953	0.1124	0.3966	0.2013	0.1043	0.0536	0.2352	0.1271	0.0641	0.0943	0.1304	0.4694	-0.3025	0.3427	0.3773	-0.1951	0.5009
48	1	full face (1)	0.1666	0.0691	0.016	-0.0224	0.0922	0.8083	-0.1314	0.6226	0.8328	0.0848	0.0717	0.2369	-0.2034	0.2785	0.4651	-0.1296	0.1293	0.3164	0.1398	0.1773	0.4303	-0.0142	0.1078	0.895	-0.1448	0.1229	0.239	-0.0928	0.1357	0.4943	0.039	0.1234	0.7522	-0.1018	0.118	0.3883	0.1665	0.1141	0.1447	0.0337	0.1554	0.8282	0.0014	0.3852	0.9971	1.1509	1.0674
49	1	full face (1)	-0.1086	0.0713	0.1281	-0.0705	0.0865	0.4152	-0.3347	0.7368	0.6497	-0.1246	0.0687	0.0697	0.0414	0.2686	0.8775	0.1096	0.1088	0.3134	-0.1354	0.1489	0.3631	-0.0267	0.1083	0.8054	0.0187	0.0839	0.824	-0.073	0.1158	0.5285	-0.1643	0.1058	0.1204	0.0751	0.0933	0.4207	0.1058	0.1014	0.2967	0.0569	0.1338	0.6706	0.2794	0.3226	0.3864	0.1559	0.5607
50	1	full face (1)	0.0166	0.0545	0.7603	-0.01	0.0621	0.8718	0.3294	0.5691	0.5627	-0.0462	0.0493	0.3495	0.1	0.2218	0.6521	0.0014	0.1031	0.9894	-0.0849	0.1292	0.5113	-0.1136	0.0839	0.176	-0.0586	0.0873	0.5023	-0.0706	0.1016	0.4874	-0.2488	0.0991	0.012	0.0163	0.0777	0.8336	-0.0614	0.0999	0.5388	-0.089	0.1258	0.4792	0.3121	0.2811	0.2668	-0.2894	0.4761
51	1	full face (1)	-0.012	0.058	0.8363	0.1076	0.0767	0.1604	-0.9957	1.2596	0.4293	0.0216	0.0564	0.7013	0.1004	0.2299	0.6622	-0.0774	0.1057	0.464	0.2047	0.1384	0.139	0.0286	0.0858	0.7394	-0.1825	0.0964	0.0583	-0.1633	0.1103	0.1385	-0.0571	0.1211	0.6373	-0.1168	0.0934	0.2112	0.2238	0.1126	0.0468	-0.1255	0.1256	0.3176	0.3735	0.3494	0.2852	-0.1721	0.4881
52	1	full face (1)	-0.0275	0.0721	0.7034	0.0121	0.0845	0.8865	0.0459	0.6875	0.9467	-0.0134	0.0794	0.8664	0.2927	0.3106	0.346	-0.0106	0.1135	0.9253	-0.3069	0.1751	0.0796	-0.108	0.1187	0.3629	0.0724	0.095	0.4458	-0.0393	0.1582	0.8038	-0.1328	0.1355	0.3268	0.0698	0.1024	0.4957	0.2098	0.1349	0.1199	-0.0197	0.1614	0.903	0.4165	0.393	0.2892	-0.6423	0.7431
53	1	full face (1)	0.1103	0.0848	0.1931	0.0699	0.0949	0.4614	-0.4575	0.9229	0.62	0.0728	0.0911	0.4245	-0.6123	0.3791	0.1063	-0.0137	0.1273	0.9145	0.3014	0.1867	0.1064	-0.0252	0.126	0.8413	-0.0769	0.1014	0.4483	-0.2306	0.1704	0.1759	-0.2266	0.1282	0.077	0.0588	0.1247	0.6373	-0.0076	0.1261	0.9518	-0.0698	0.161	0.6644	0.6269	0.4261	0.1412	0.4266	0.6842
54	1	full face (1)	0.0744	0.0624	0.2326	-0.1104	0.0718	0.1239	0.1369	0.5014	0.7848	0.0253	0.0647	0.6958	-0.1032	0.2033	0.6118	-0.003	0.0925	0.9742	0.1039	0.1259	0.4091	-0.0665	0.0913	0.4666	0.1105	0.0738	0.1344	-0.0128	0.1328	0.923	-0.0699	0.0913	0.4439	0.0799	0.0824	0.3321	-0.0352	0.0869	0.6855	0.1651	0.1294	0.2021	-0.2187	0.2686	0.4155	0.3469	0.5549
55	1	full face (1)	-0.0253	0.0696	0.7164	0.0614	0.1106	0.5791	0.2507	0.7286	0.7308	0.038	0.0714	0.5947	0.1591	0.3178	0.6167	0.0361	0.1265	0.7752	-0.0677	0.1654	0.6821	-0.009	0.1255	0.9431	-0.0409	0.1145	0.7209	0.0668	0.1397	0.6325	-0.0945	0.1294	0.4654	0.1111	0.1023	0.2778	-0.288	0.1485	0.0524	0.0362	0.1603	0.8212	-0.4191	0.4243	0.3233	0.2255	0.5638
56	1	full face (1)	-0.0869	0.0758	0.2511	0.0107	0.0882	0.9032	0.3746	0.7367	0.6112	-0.0309	0.072	0.668	0.2422	0.2443	0.3214	0.1249	0.1368	0.361	-0.1512	0.159	0.3416	-0.048	0.1152	0.677	0.0215	0.1174	0.8545	0.1288	0.1457	0.3769	0.0965	0.1234	0.4343	0.0063	0.1114	0.9549	0.1246	0.1409	0.3764	-0.1103	0.1544	0.4748	-0.1453	0.3714	0.6957	-0.2786	0.5301
57	1	full face (1)	-0.0965	0.0676	0.1533	-0.1298	0.0757	0.0864	0.1299	0.5465	0.8122	-0.0904	0.0599	0.1312	0.0318	0.2291	0.8898	0.1866	0.1158	0.1072	-0.044	0.1432	0.7585	0.0716	0.095	0.4509	0.0811	0.1	0.4176	0.1671	0.1233	0.1752	0.0994	0.1083	0.3588	0.0528	0.0945	0.5764	0.061	0.1131	0.5897	0.0341	0.1314	0.795	-0.032	0.3165	0.9196	-0.2394	0.419
58	1	full face (1)	-0.1194	0.082	0.1456	-0.2248	0.0932	0.0158	0.0344	0.6405	0.9572	-0.0988	0.0739	0.1813	0.1733	0.2648	0.5128	0.1793	0.1345	0.1823	-0.1093	0.1572	0.4868	0.1413	0.1188	0.2342	0.1409	0.115	0.2203	0.169	0.1515	0.2648	0.1951	0.1309	0.1361	0.0078	0.113	0.9451	0.1337	0.1358	0.3248	0.064	0.1613	0.6914	-0.289	0.3982	0.4679	-0.6921	0.734
59	1	full face (1)	0.0689	0.0622	0.2677	0.1875	0.0819	0.022	0.56	0.8588	0.5144	0.0587	0.0587	0.3176	-0.036	0.2479	0.8846	0.1328	0.1159	0.2518	-0.0172	0.1502	0.9091	0.0273	0.0971	0.7787	0.0119	0.0892	0.8941	-0.0511	0.1158	0.6591	-0.1173	0.1072	0.2735	0.1169	0.0854	0.1709	0.2636	0.1026	0.0102	-0.0243	0.1263	0.8472	0.0581	0.3143	0.8534	-0.2164	0.4962
60	1	full face (1)	0.1148	0.0762	0.132	-0.0581	0.1012	0.5658	-0.7009	1.0694	0.5122	0.0194	0.0807	0.8105	-0.2629	0.2989	0.3791	0.1709	0.1403	0.223	0.1545	0.1901	0.4162	0.0491	0.1196	0.6814	-0.0208	0.1053	0.8433	-0.0758	0.1403	0.5892	-0.0197	0.1297	0.8793	0.1477	0.1213	0.2232	-0.0666	0.1362	0.6251	0.0073	0.1579	0.9631	-0.6684	0.4896	0.1722	-0.353	0.7058
61	1	full face (1)	-0.0339	0.0647	0.6003	0.0028	0.0808	0.9724	0.1684	0.5644	0.7654	0.0339	0.0624	0.5875	-0.1405	0.2718	0.6052	0.0263	0.1089	0.8088	-0.1379	0.1419	0.3313	0.0434	0.0917	0.6359	0.034	0.0856	0.6908	-0.0167	0.1245	0.8932	-0.0566	0.1086	0.6021	0.103	0.0949	0.2779	0.0034	0.0976	0.9721	0.1039	0.1236	0.4004	0.3143	0.3314	0.343	0.4224	0.5978
62	1	full face (1)	-0.0734	0.0557	0.1873	-0.0262	0.0758	0.7299	-0.1221	0.504	0.8086	0.0831	0.0591	0.1594	0.2034	0.2595	0.4333	-0.125	0.1008	0.2149	-0.3312	0.1441	0.0216	-0.2026	0.0968	0.0363	0.1018	0.0848	0.2297	0.0793	0.1039	0.445	0.0063	0.0967	0.9482	0.125	0.0929	0.1784	0.0402	0.1026	0.6948	-0.0442	0.1349	0.743	0.0637	0.2999	0.8317	-0.0398	0.4684
63	1	full face (1)	0.0139	0.0538	0.7953	0.1387	0.0811	0.0872	-0.2226	0.6219	0.7205	0.0008	0.0567	0.9894	-0.3971	0.2565	0.1217	0.1126	0.1096	0.3041	0.0843	0.1414	0.5511	0.0826	0.095	0.3844	-0.1042	0.1009	0.3016	-0.0163	0.1156	0.8876	-0.0787	0.0975	0.4198	-0.021	0.0943	0.8237	-0.3233	0.1224	0.0083	-0.1272	0.1417	0.3692	-0.069	0.3346	0.8366	0.2141	0.5287
64	1	full face (1)	-0.0365	0.0545	0.5036	0.1091	0.0852	0.2006	-0.2177	0.6817	0.7494	-0.0574	0.063	0.3626	0.1533	0.2311	0.5071	0.2062	0.1047	0.0488	0.2349	0.1455	0.1064	0.1993	0.0992	0.0446	0.0883	0.0862	0.3055	0.0003	0.113	0.9978	0.0008	0.1134	0.9946	0.1207	0.0948	0.2028	0.1038	0.1022	0.3099	-0.0723	0.125	0.5632	0.1567	0.3001	0.6016	-0.5736	0.7611
65	1	full face (1)	0.0567	0.0669	0.397	0.0211	0.082	0.7966	0.5679	0.8864	0.5218	0.0153	0.0673	0.8206	-0.0178	0.228	0.9379	-0.1409	0.1006	0.1611	-0.1645	0.1467	0.2621	0.0234	0.0882	0.7908	-0.1542	0.0947	0.1034	-0.0048	0.1242	0.9694	-0.1254	0.1108	0.2576	-0.164	0.1021	0.1081	0.0054	0.0963	0.9554	-0.0416	0.1465	0.7763	-0.1376	0.3054	0.6524	0.0589	0.4758
66	1	full face (1)	-0.0728	0.0846	0.3898	0.0348	0.1052	0.7411	-1.3916	1.8689	0.4565	-0.0876	0.078	0.2616	-0.4308	0.3589	0.23	-0.0882	0.1568	0.574	0.1157	0.1801	0.5207	-0.1034	0.1229	0.4	-0.0972	0.1224	0.4269	0.0406	0.1614	0.8015	0.0004	0.1333	0.9979	-0.0449	0.1218	0.7122	0.1279	0.1346	0.3422	-0.1208	0.1873	0.5189	-0.0371	0.3786	0.922	0.2072	0.6939
67	1	full face (1)	-0.1045	0.062	0.0919	-0.0825	0.0771	0.2846	0.1621	0.6496	0.803	-0.0887	0.0671	0.1863	0.2814	0.2859	0.325	0.1359	0.1168	0.2446	0.0481	0.1497	0.748	0.0396	0.1029	0.7004	0.0634	0.085	0.4558	0.0969	0.1197	0.4183	0.0929	0.0961	0.3335	0.0467	0.094	0.6196	0.2053	0.1043	0.0491	0.0391	0.1431	0.7847	-0.4303	0.37	0.2449	-0.2565	0.5297
68	1	full face (1)	-0.0373	0.0766	0.6269	0.0878	0.0721	0.2235	-0.5958	0.8492	0.483	-0.0325	0.0801	0.6848	0.119	0.2422	0.6231	-0.0597	0.1025	0.5601	-0.1003	0.1416	0.4788	0.084	0.0911	0.3565	-0.0633	0.0905	0.484	-0.1231	0.1638	0.4523	-0.0076	0.1047	0.9423	0.0585	0.1001	0.5591	-0.0004	0.1117	0.9975	-0.2079	0.1331	0.1183	-0.1844	0.2967	0.5343	0.2757	0.4729
69	1	full face (1)	-0.0263	0.064	0.6807	0.0867	0.0854	0.3103	0.0429	0.6392	0.9465	0.0095	0.0668	0.8872	-0.3615	0.2608	0.1658	0.1072	0.098	0.2742	0.0617	0.1332	0.6433	0.0591	0.0937	0.528	-0.0501	0.0891	0.5741	0.144	0.1218	0.237	0.1818	0.1121	0.1048	-0.0262	0.0891	0.7689	-0.1895	0.1017	0.0624	-0.3335	0.1342	0.013	0.0741	0.3327	0.8238	0.5839	0.6737
70	1	full face (1)	-0.0617	0.0571	0.2801	-0.0178	0.0744	0.8108	-0.76	0.9591	0.4281	-0.0103	0.0551	0.8513	0.0852	0.2072	0.6808	-0.0679	0.1013	0.5026	-0.0271	0.1221	0.8242	0.0532	0.0786	0.4981	-0.0979	0.0819	0.2317	-0.0447	0.0991	0.6522	-0.0244	0.1004	0.8081	0.1183	0.0884	0.1807	-0.1301	0.0962	0.1763	0.0786	0.127	0.5361	-0.5823	0.382	0.1274	-0.2262	0.4489
71	1	full face (1)	-0.0298	0.067	0.6558	0.0574	0.0717	0.4237	1.6767	2.0066	0.4034	-0.058	0.0593	0.3283	0.0062	0.2787	0.9823	-0.0083	0.1112	0.9403	-0.0952	0.1557	0.5408	-0.0925	0.0936	0.3231	0.0176	0.0888	0.8429	0.0932	0.1278	0.4657	0.0065	0.1245	0.9584	0.1375	0.0995	0.1669	0.0736	0.1114	0.5084	-0.014	0.1406	0.9207	0.3038	0.3532	0.3896	-0.1903	0.5065
72	1	full face (1)	-0.1357	0.0662	0.0404	0.0086	0.0879	0.9219	-0.7305	1.059	0.4903	-0.1011	0.0651	0.1203	-0.4227	0.3167	0.1819	0.0099	0.1238	0.9365	0.0758	0.1522	0.6185	0.0492	0.1053	0.6405	0.1133	0.0996	0.2556	0.0011	0.1225	0.9926	0.1577	0.1333	0.2368	0.0716	0.0965	0.458	0.1124	0.1171	0.3373	0.0238	0.1365	0.8615	0.1991	0.345	0.5639	0.5575	0.7539
73	1	full face (1)	0.0211	0.0773	0.7849	0.0111	0.0814	0.8919	0.0378	0.6291	0.9521	0.0625	0.0762	0.412	0.1749	0.2652	0.5096	0.1651	0.1241	0.1834	-0.0211	0.163	0.897	-0.0441	0.1024	0.6667	0.0054	0.0942	0.9541	-0.0712	0.1451	0.6233	-0.1755	0.1164	0.1315	0.0616	0.1056	0.5594	-0.1471	0.1217	0.2269	0.1078	0.1685	0.5222	-0.2062	0.3513	0.5572	0.1688	0.5457
74	1	full face (1)	-0.0657	0.0578	0.2553	-0.0252	0.0759	0.7399	-1.238	1.5546	0.4258	-0.0606	0.0551	0.2718	-0.1897	0.2628	0.4704	-0.1353	0.1161	0.244	-0.0939	0.1499	0.5311	-0.0826	0.0858	0.3357	-0.0268	0.0889	0.7627	-0.1076	0.1156	0.352	0.0889	0.11	0.4188	0.077	0.0918	0.4019	0.0749	0.1008	0.4579	-0.0145	0.1353	0.9144	-0.0521	0.3027	0.8632	0.0778	0.4622
75	1	full face (1)	-0.0591	0.0497	0.2342	0.0239	0.0739	0.7459	0.8105	1.1137	0.4668	-0.0016	0.0547	0.9763	0.013	0.2289	0.9547	-0.0435	0.0938	0.6427	-0.1349	0.1356	0.3198	-0.0793	0.0834	0.3417	-0.0569	0.0842	0.4994	-0.0865	0.1075	0.4212	0.0216	0.0964	0.8229	-0.0377	0.0797	0.6357	-0.021	0.0958	0.8266	-0.0245	0.1153	0.8319	0.2709	0.3281	0.4091	0.801	0.7724
76	1	full face (1)	-0.047	0.0467	0.315	-0.0638	0.0697	0.3605	0.8819	1.1351	0.4372	-0.0378	0.0503	0.453	0.1347	0.2123	0.5257	-0.0275	0.0911	0.7629	-0.0998	0.1176	0.3961	-0.0672	0.0806	0.404	-0.0094	0.0783	0.904	-0.0557	0.0962	0.5622	0.0305	0.0899	0.7341	-0.0737	0.0737	0.3179	0.0203	0.0882	0.8176	0.0727	0.1002	0.468	0.4165	0.3253	0.2004	0.3802	0.5081
77	1	full face (1)	-0.0396	0.0533	0.4576	-0.0564	0.0769	0.463	0.9177	1.2231	0.4531	-0.0351	0.0562	0.5318	-0.0318	0.2448	0.8967	0.0051	0.0956	0.9574	-0.0334	0.1221	0.7842	-0.0814	0.0874	0.3515	-0.0043	0.0803	0.9571	-0.1183	0.1009	0.2408	0.0566	0.0929	0.542	-0.0602	0.0796	0.4493	0.0358	0.0924	0.6988	0.0844	0.1098	0.4422	0.1409	0.3016	0.6405	0.5053	0.5773
78	1	full face (1)	0.0007	0.0604	0.9904	-0.1334	0.0869	0.1247	0.678	0.9445	0.4728	-0.0121	0.0579	0.8342	-0.0977	0.2608	0.708	0.0321	0.1093	0.7692	-0.0549	0.1472	0.709	-0.0395	0.1026	0.6999	0.1405	0.0913	0.1238	0.0476	0.1162	0.6819	0.147	0.1113	0.1867	-0.0185	0.0891	0.8352	-0.0675	0.1054	0.5216	0.1565	0.1384	0.2582	0.3061	0.3465	0.3771	0.0659	0.4947
79	1	full face (1)	0.0178	0.0589	0.7619	-0.2221	0.0682	0.0011	0.2045	0.5578	0.7138	-0.0136	0.0575	0.8126	0.1193	0.2374	0.6152	0.0183	0.0962	0.8489	-0.0453	0.1349	0.737	0.0494	0.0929	0.5947	-0.0688	0.0785	0.3806	-0.0878	0.1103	0.4262	-0.0045	0.107	0.9668	-0.1043	0.0842	0.2158	-0.1363	0.0908	0.1331	0.0733	0.1179	0.5339	0.324	0.3125	0.2998	0.144	0.4199
80	1	full face (1)	-0.0057	0.087	0.9479	0.0067	0.0807	0.9337	0.3137	0.7049	0.6563	0.0205	0.0869	0.8135	-0.0959	0.2821	0.7338	-0.0109	0.1121	0.9224	0.0787	0.1355	0.5611	-0.1248	0.1004	0.2139	-0.0784	0.0836	0.3488	-0.1433	0.1537	0.3511	-0.106	0.1052	0.3141	0.0589	0.0966	0.5422	-0.0356	0.1146	0.756	0.1481	0.1372	0.2804	0.1178	0.3251	0.7171	-0.3331	0.5823
81	1	full face (1)	0.0304	0.0483	0.5291	-0.0201	0.0795	0.8008	0.6375	0.8909	0.4743	0.0273	0.056	0.6264	-0.0026	0.2538	0.992	-0.1052	0.1094	0.3364	-0.0212	0.1469	0.8852	0.0193	0.0896	0.8297	0.1684	0.0951	0.0766	0.2172	0.1094	0.0472	0.0759	0.1049	0.4692	0.0324	0.0867	0.7084	0.1562	0.1117	0.162	0.1352	0.1399	0.3339	-0.0734	0.2995	0.8063	-0.6095	0.704
82	1	full face (1)	-0.0216	0.059	0.7146	0.1681	0.0839	0.045	-0.5359	0.9114	0.5565	0.0133	0.0562	0.8132	0.1458	0.2716	0.5915	-0.0735	0.1195	0.5385	0.0258	0.1612	0.8727	-0.0849	0.1049	0.4185	-0.1076	0.0938	0.2514	0.005	0.1189	0.9667	-0.0701	0.1143	0.5399	0.0068	0.0981	0.9447	0.1401	0.1171	0.2316	-0.0158	0.1369	0.9082	0.1512	0.3056	0.6207	0.4019	0.6081
83	1	full face (1)	0.1169	0.0918	0.2031	-0.1386	0.0845	0.1009	0.0603	0.6674	0.9281	0.0872	0.0991	0.3791	-0.5658	0.3276	0.0841	0.0284	0.134	0.8319	0.0067	0.1868	0.9715	-0.0981	0.121	0.4176	0.0606	0.0998	0.5439	0.0764	0.2341	0.7442	-0.0423	0.1216	0.7281	0.1251	0.1191	0.2934	-0.0455	0.1233	0.7124	0.0057	0.1706	0.9733	-0.1465	0.3205	0.6476	0.8789	0.8795
84	1	full face (1)	-0.0697	0.0739	0.3453	0.0021	0.0836	0.9803	0.5863	0.9871	0.5525	-0.1289	0.0775	0.0965	-0.0026	0.2972	0.9931	0.1844	0.1209	0.1272	0.0769	0.1834	0.675	0.1144	0.1046	0.274	-0.0617	0.1075	0.5656	-0.0261	0.1599	0.8705	0.0228	0.1047	0.8276	0.0033	0.1062	0.975	-0.0301	0.1226	0.8062	-0.1815	0.1601	0.257	0.0293	0.3313	0.9296	-0.778	0.7776
85	1	full face (1)	-0.0151	0.0546	0.7818	-0.059	0.0722	0.4139	0.3591	0.6115	0.557	-0.0004	0.057	0.9939	0.1789	0.2757	0.5165	-0.0544	0.1055	0.6061	-0.074	0.1466	0.6138	0.1852	0.1018	0.069	0.0069	0.0818	0.9326	0.2855	0.1185	0.016	0.101	0.1034	0.3284	0.0586	0.0849	0.4898	0.2342	0.107	0.0287	-0.0015	0.1161	0.9899	-0.218	0.3603	0.5451	-0.2497	0.4975
86	1	full face (1)	-0.159	0.0514	0.002	-0.0619	0.0651	0.3419	-0.2074	0.5248	0.6927	-0.0743	0.0583	0.2028	-0.1013	0.2102	0.6297	-0.0291	0.0938	0.7565	-0.0109	0.1181	0.9265	0.0928	0.0861	0.2809	0.1069	0.0828	0.1968	0.0288	0.1027	0.7794	0.1715	0.1013	0.0903	0.2307	0.0794	0.0037	-0.0101	0.0972	0.917	0.0595	0.1081	0.5822	0.0068	0.2818	0.9807	0.6138	0.663
87	1	full face (1)	0.0025	0.0699	0.9713	-0.0622	0.0852	0.4654	0.098	0.5982	0.8698	0.0303	0.0768	0.693	-0.6097	0.2895	0.0352	0.0265	0.1031	0.7969	0.0347	0.1454	0.8116	-0.0119	0.1055	0.9105	-0.0261	0.0883	0.7672	-0.0228	0.1347	0.8658	-0.039	0.1028	0.7044	0.0416	0.0937	0.6569	0.0808	0.1079	0.4539	-0.1247	0.1243	0.3155	-0.1549	0.306	0.6128	0.8005	0.8946
88	2	midface (2)	-0.0329	0.101	0.7445	-0.1992	0.1454	0.1707	1.5362	2.1155	0.4678	-0.0645	0.1018	0.5264	0.9847	0.559	0.0781	-0.1609	0.1906	0.3987	-0.4437	0.2879	0.1233	-0.1442	0.167	0.3879	-0.0739	0.1572	0.6381	-0.0426	0.2157	0.8434	-0.1557	0.213	0.4647	-0.2363	0.1992	0.2355	0.0394	0.1889	0.8348	-0.1297	0.2337	0.579	-0.0667	0.5276	0.8995	-0.3004	0.8043
89	2	midface (2)	0.0151	0.0645	0.815	0.098	0.0867	0.2582	0.3633	0.6851	0.5959	-0.0461	0.0682	0.4985	0.0777	0.2905	0.7892	-0.1233	0.1152	0.2848	-0.1089	0.1593	0.494	0.1372	0.1016	0.1766	-0.1046	0.0995	0.2929	0.1023	0.1288	0.4271	0.064	0.1264	0.6127	-0.0596	0.1034	0.5644	-0.0395	0.1188	0.7397	-0.1993	0.1566	0.2031	-0.0124	0.4	0.9752	0.2479	0.5864
90	2	midface (2)	-0.0297	0.0637	0.6407	0.0419	0.0713	0.5565	-0.6465	0.9117	0.4782	-0.0733	0.0641	0.2528	0.2352	0.2324	0.3114	0.1006	0.1004	0.3162	-0.1144	0.1239	0.3557	0.0566	0.0874	0.5172	0.0633	0.0765	0.4082	0.1502	0.1208	0.2135	-0.0455	0.0825	0.5814	0.0008	0.0949	0.9934	-0.0636	0.0821	0.4391	-0.1897	0.1124	0.0915	0.2936	0.3021	0.3311	0.0475	0.4087
91	2	midface (2)	0.0181	0.0638	0.7773	-0.0486	0.0798	0.5424	-0.6782	1.0101	0.5019	0.0283	0.0637	0.6567	0.1779	0.2628	0.4984	-0.0648	0.1112	0.5597	-0.2688	0.1505	0.0741	-0.0822	0.0921	0.3717	0.024	0.0932	0.7965	0.0284	0.1108	0.7974	-0.0267	0.1128	0.8133	0.0008	0.093	0.9928	0.1258	0.1043	0.2279	0.0924	0.1325	0.4854	-0.4748	0.4174	0.2554	0.8302	0.8467
92	2	midface (2)	0.0344	0.0934	0.7125	0.0772	0.1038	0.457	-0.0248	0.8217	0.9759	-0.0445	0.0995	0.6547	0.3857	0.3783	0.308	-0.0874	0.1468	0.5517	-0.4647	0.2363	0.0492	-0.0172	0.1328	0.897	-0.0204	0.1205	0.8655	-0.114	0.1909	0.5504	-0.241	0.1464	0.0998	-0.1317	0.143	0.3572	-0.1406	0.1502	0.3493	-0.1922	0.2038	0.3457	0.4001	0.5006	0.4241	-0.3715	0.7158
93	2	midface (2)	0.0383	0.0762	0.6151	-0.0766	0.0895	0.3918	-0.02	0.7195	0.9778	0.0457	0.0745	0.5393	0.2413	0.3018	0.424	-0.1359	0.1358	0.3171	-0.4702	0.2083	0.024	-0.1361	0.1188	0.2516	-0.0881	0.1051	0.4022	-0.1588	0.1489	0.2863	-0.2301	0.1289	0.0742	-0.2164	0.1238	0.0805	-0.1493	0.1332	0.2624	-0.1547	0.1682	0.3578	0.4356	0.4415	0.3238	0.0991	0.5673
94	2	midface (2)	-0.0477	0.0664	0.4725	-0.1275	0.0765	0.0958	0.0344	0.579	0.9526	-0.0742	0.0698	0.2881	-0.0363	0.2384	0.8789	0.0253	0.1045	0.8089	-0.0936	0.1445	0.5169	-0.1196	0.102	0.2406	0.0532	0.0807	0.5102	-0.1056	0.1326	0.4256	-0.243	0.1062	0.0221	-0.1497	0.0968	0.1222	0.1033	0.1085	0.341	-0.065	0.1257	0.6052	0.244	0.321	0.4473	0.5937	0.6462
95	2	midface (2)	0.0113	0.0674	0.8664	-0.0759	0.0797	0.3414	-0.2134	0.7044	0.7619	0.0219	0.0638	0.7315	-0.0861	0.293	0.769	0.1129	0.1129	0.3171	0.0639	0.1471	0.6639	0.1268	0.0986	0.1988	-0.0274	0.0905	0.7621	-0.1814	0.1198	0.1301	-0.1158	0.1142	0.3109	-0.0433	0.0941	0.645	-0.0015	0.114	0.9894	0.0516	0.1432	0.7183	-0.194	0.3575	0.5875	-0.3423	0.5738
96	2	midface (2)	-0.0774	0.0752	0.3035	0.1166	0.0912	0.2014	-0.5952	0.9347	0.5243	-0.0477	0.0695	0.4927	0.1364	0.2898	0.6379	0.0368	0.1309	0.7786	-0.0809	0.1612	0.6159	0.1571	0.1222	0.1985	0.0022	0.0913	0.9805	0.0788	0.1311	0.5476	0.2308	0.1135	0.0421	0.0107	0.1038	0.9179	0.1706	0.1227	0.1646	0.0806	0.1629	0.6206	-0.0476	0.3708	0.898	0.0408	0.5131
97	2	midface (2)	-0.0697	0.068	0.3056	-0.0326	0.0891	0.7147	-0.2723	0.6278	0.6645	-0.0628	0.069	0.3628	-0.1064	0.2505	0.6708	0.1595	0.1082	0.1406	0.1219	0.1612	0.4493	-0.0792	0.0941	0.4001	0.1717	0.099	0.083	0.2356	0.1318	0.074	0.1495	0.1232	0.2247	0.2039	0.1143	0.0743	-0.1181	0.114	0.3005	0.0973	0.1476	0.5097	-0.0822	0.3669	0.8228	-0.3227	0.5696
98	2	midface (2)	-0.0719	0.0694	0.3003	-0.0387	0.0915	0.6721	0.1839	0.7201	0.7984	0.0598	0.0785	0.4462	0.0455	0.2621	0.8622	0.019	0.1124	0.8657	-0.1977	0.1597	0.2156	-0.0646	0.1128	0.5668	-0.0793	0.1047	0.4485	0.0054	0.1367	0.9686	0.0894	0.1196	0.4551	-0.1921	0.1073	0.0733	-0.0857	0.1226	0.4844	-0.1035	0.1524	0.497	0.035	0.3299	0.9154	0.3226	0.6031
99	2	midface (2)	0.0657	0.0719	0.3607	0.0198	0.0653	0.7613	-0.3557	0.6336	0.5745	0.1004	0.0745	0.1776	-0.2208	0.236	0.3496	0.0469	0.1128	0.6775	0.0646	0.1411	0.647	-0.0153	0.0984	0.8761	-0.0578	0.0761	0.4477	-0.0369	0.1478	0.8028	0.1016	0.0935	0.2773	0.0297	0.0811	0.7138	0.1911	0.0933	0.0406	-0.0899	0.1407	0.5228	0.1439	0.2736	0.5988	-0.1028	0.4198
100	2	midface (2)	0.0066	0.0551	0.9041	0.0237	0.0746	0.7505	-0.4615	0.7959	0.562	-0.0153	0.0603	0.8	0.3606	0.237	0.1282	-0.0278	0.0957	0.7716	-0.0499	0.1337	0.7092	-0.1221	0.0841	0.1464	0.1925	0.1018	0.0585	0.2225	0.1078	0.039	0.0611	0.1011	0.5452	0.1152	0.0813	0.1565	0.0294	0.0971	0.7623	-0.1028	0.1185	0.3856	-0.1061	0.2949	0.719	0.5694	0.6238
101	2	midface (2)	-0.0345	0.0822	0.675	-0.0224	0.0997	0.8225	0.1125	0.713	0.8746	0.0123	0.0776	0.8736	-0.1264	0.3047	0.6784	-0.0732	0.1399	0.6006	0.0136	0.1734	0.9373	-0.0321	0.1261	0.7991	-0.0088	0.1123	0.9375	0.0416	0.1524	0.7849	0.2112	0.1458	0.1476	-0.041	0.1223	0.7376	0.0471	0.139	0.7349	-0.0763	0.1973	0.6991	0.0551	0.3609	0.8787	0.8971	0.9473
102	2	midface (2)	-0.1026	0.0462	0.0262	0.1315	0.0691	0.057	-0.1614	0.5521	0.77	-0.0054	0.0494	0.9133	0.2289	0.2194	0.2969	-0.17	0.1084	0.1167	0.0072	0.1362	0.958	0.2024	0.0911	0.0264	0.0469	0.0873	0.5912	0.1996	0.1164	0.0863	0.2225	0.1052	0.0344	0.0097	0.0846	0.9083	0.0417	0.1002	0.6771	0.2522	0.1446	0.0811	-0.0514	0.331	0.8767	-0.0885	0.4476
103	2	midface (2)	0.0713	0.0607	0.2404	-0.0131	0.0749	0.8616	-0.0963	0.5725	0.8664	0.1187	0.0636	0.062	-0.3047	0.2517	0.2261	0.0416	0.1061	0.695	-0.059	0.1462	0.6865	-0.0366	0.0945	0.6982	0.0655	0.0858	0.4456	0.0362	0.1234	0.769	0.0642	0.1063	0.5458	0.0828	0.0924	0.3704	0.1692	0.1109	0.1272	0.1784	0.1227	0.1459	-0.1989	0.3479	0.5675	-0.4439	0.535
104	2	midface (2)	-0.0034	0.0612	0.9561	-0.0383	0.0769	0.6184	-0.634	0.9952	0.5241	0.0514	0.0703	0.4647	0.2421	0.2496	0.332	-0.1743	0.1081	0.107	-0.1525	0.1568	0.3307	0.0057	0.1047	0.9568	-0.0599	0.0932	0.52	0.0075	0.1352	0.9556	-0.0087	0.1138	0.9389	-0.0126	0.0958	0.8957	-0.079	0.1133	0.4857	0.2782	0.1454	0.0557	-0.1043	0.3393	0.7584	0.7272	0.8121
105	2	midface (2)	0.0359	0.0491	0.4647	0.0358	0.0794	0.6521	-0.2969	0.6108	0.6269	0.0154	0.0568	0.7867	-0.1706	0.237	0.4716	0.1251	0.0978	0.2005	0.1433	0.1406	0.3081	0.026	0.0897	0.7717	0.1887	0.0897	0.0355	0.0721	0.1118	0.5189	-0.1359	0.0945	0.1504	0.1592	0.0928	0.0864	0.0642	0.1052	0.5418	0.0221	0.1129	0.8448	0.1098	0.3378	0.7452	0.0706	0.4096
106	2	midface (2)	-0.0264	0.0577	0.647	0.0248	0.0821	0.7629	-0.567	0.8182	0.4883	0.0081	0.0625	0.8974	-0.2346	0.2458	0.3399	0.0945	0.1006	0.3477	0.1619	0.1505	0.2823	0.0904	0.0919	0.3251	0.1665	0.0894	0.0625	-0.0132	0.1192	0.912	-0.0362	0.1004	0.7182	0.0773	0.0871	0.3751	0.0827	0.1047	0.43	0.0939	0.1236	0.4474	-0.0215	0.3196	0.9464	-0.1412	0.4782
107	2	midface (2)	-0.0708	0.0685	0.3013	0.2505	0.0911	0.006	-0.8611	1.2101	0.4767	-0.0991	0.0709	0.1622	0.1177	0.2868	0.6817	-0.0958	0.1238	0.439	-0.0144	0.166	0.9307	0.0615	0.099	0.5345	0.0229	0.088	0.795	-0.0071	0.1257	0.9551	0.1039	0.1114	0.351	-0.1019	0.1055	0.334	0.1319	0.1098	0.2298	-0.0838	0.1475	0.57	-0.0302	0.3286	0.9268	0.9718	0.9099
108	2	midface (2)	-0.021	0.0627	0.7375	-0.0358	0.073	0.6239	-0.2552	0.6745	0.7052	0.0437	0.0642	0.4962	-0.3364	0.2634	0.2016	-0.164	0.1102	0.1368	0.0065	0.1536	0.9661	0.0128	0.0853	0.8804	-0.0728	0.0912	0.4247	-0.0021	0.1144	0.9852	-0.0232	0.1112	0.8346	-0.1351	0.0903	0.1345	0.217	0.1142	0.0574	0.1875	0.1439	0.1926	0.4907	0.3504	0.1613	0.4337	0.565
109	2	midface (2)	-0.0375	0.1053	0.722	0.002	0.1334	0.9883	0.8153	1.4256	0.5674	0.1646	0.136	0.2261	0.1554	0.4452	0.727	0.0274	0.1938	0.8874	0.1357	0.2757	0.6226	0.1345	0.177	0.4475	-0.0823	0.1653	0.6185	0.1701	0.2362	0.4715	0.3339	0.2457	0.1743	0.081	0.1978	0.6821	-0.1843	0.2392	0.4409	0.2232	0.2962	0.4511	-1.0718	0.8638	0.2147	-0.2341	0.8947
110	2	midface (2)	0.1072	0.0612	0.0798	0.0542	0.0758	0.4744	-0.2548	0.6119	0.6771	0.1129	0.0619	0.068	0.2166	0.2637	0.4114	-0.0661	0.1086	0.5427	0.1395	0.1498	0.3518	-0.022	0.0923	0.8116	-0.0584	0.0912	0.5218	0.0692	0.1057	0.513	-0.1	0.1057	0.3441	-0.0442	0.0963	0.6464	-0.1195	0.1145	0.2967	-0.2225	0.1201	0.0638	-0.0612	0.2842	0.8295	0.2865	0.5444
111	2	midface (2)	-0.0015	0.0753	0.9838	-0.0354	0.0902	0.6944	-0.2623	0.6959	0.7062	-0.0213	0.0771	0.782	-0.124	0.2593	0.6325	-0.0381	0.1279	0.7659	-0.0717	0.1586	0.6511	-0.2146	0.1241	0.0838	-0.0423	0.1009	0.6752	-0.2722	0.1696	0.1084	-0.0688	0.124	0.5792	-0.2294	0.1091	0.0355	-0.1872	0.1292	0.1474	-0.1968	0.1543	0.2022	-0.4204	0.396	0.2885	-0.3027	0.6771
112	2	midface (2)	-0.0486	0.0563	0.3885	0.1077	0.0693	0.1202	-0.4072	0.6596	0.537	0.0201	0.0585	0.7312	0.0649	0.2394	0.7864	0.0627	0.0926	0.4979	0.2205	0.1359	0.1046	0.1913	0.0866	0.0272	0.0512	0.0794	0.5186	0.1805	0.0945	0.0561	0.1388	0.0989	0.1606	-0.0311	0.0889	0.7261	-0.1242	0.0937	0.1849	0.0225	0.1221	0.8536	0.0518	0.2607	0.8423	-0.0712	0.4497
113	2	midface (2)	0.0768	0.0555	0.1663	0.0357	0.0636	0.5748	0.3298	0.7091	0.6418	0.0505	0.0549	0.3572	-0.2159	0.2231	0.3333	0.0844	0.1097	0.4415	-0.3316	0.1355	0.0144	-0.123	0.0876	0.1604	-0.1848	0.0935	0.0482	-0.2227	0.1131	0.0489	-0.2305	0.0977	0.0182	-0.0361	0.0881	0.6821	-0.1545	0.1011	0.1265	-0.2204	0.1439	0.1257	0.0678	0.3545	0.8484	-0.1985	0.4837
114	2	midface (2)	-0.0222	0.0633	0.726	-0.0023	0.0863	0.9786	0.0185	0.5967	0.9753	-0.0176	0.0696	0.8007	-0.0313	0.2459	0.8988	0.2166	0.1115	0.0521	0.134	0.152	0.3781	0.1438	0.1036	0.165	0.0447	0.0891	0.6161	-0.0115	0.1205	0.9241	0.0497	0.11	0.6518	-0.0054	0.094	0.9544	-0.0584	0.1058	0.5807	-0.1636	0.1427	0.2517	0.2678	0.3549	0.4506	-0.6794	0.728
115	2	midface (2)	-0.0223	0.0584	0.7028	-0.0053	0.08	0.9476	0.7211	0.9932	0.4678	-0.0041	0.0616	0.9464	-0.0238	0.2581	0.9266	-0.024	0.1064	0.8218	-0.0615	0.1509	0.6837	-0.0073	0.0854	0.9323	-0.1167	0.0989	0.2379	0.0569	0.1145	0.6195	0.027	0.1181	0.8193	-0.1554	0.0977	0.1116	0.0211	0.1076	0.8445	-0.1431	0.1478	0.3332	-0.4561	0.381	0.2313	0.3621	0.5886
116	2	midface (2)	0.023	0.0646	0.7222	0.1066	0.085	0.2098	-0.9875	1.309	0.4506	0.0493	0.0588	0.401	-0.1289	0.2649	0.6266	-0.0286	0.1115	0.7976	0.0968	0.1533	0.5278	0.0358	0.0861	0.6777	-0.0624	0.0913	0.4942	0.0198	0.111	0.8585	0.0076	0.0989	0.939	-0.1043	0.1027	0.3094	-0.088	0.1118	0.431	-0.0324	0.1463	0.8246	-0.3891	0.3818	0.3082	-0.1035	0.5704
117	2	midface (2)	-0.1085	0.0792	0.1706	-0.1051	0.0795	0.1864	-0.0697	0.5492	0.899	-0.0959	0.086	0.2648	0.0903	0.2393	0.7059	-0.1647	0.1299	0.2049	-0.1009	0.1599	0.528	0.2358	0.1112	0.0339	0.0552	0.0953	0.5628	0.1226	0.1659	0.4602	0.0412	0.1164	0.7235	-0.1254	0.1084	0.2473	0.0012	0.1135	0.9916	0.0253	0.1587	0.8734	-0.1759	0.3144	0.5757	-0.2195	0.4967
118	2	midface (2)	0.0234	0.0597	0.6952	-0.0506	0.0795	0.5242	0.9906	1.2438	0.4257	-0.0125	0.0603	0.8353	0.3344	0.2723	0.2195	-0.0631	0.111	0.5702	-0.1025	0.1392	0.4615	-0.1734	0.0994	0.0811	0.0006	0.0912	0.995	0.0849	0.1077	0.4302	-0.0971	0.1052	0.356	0.0458	0.0884	0.6042	-0.1587	0.1066	0.1366	-0.0884	0.1268	0.4857	0.6049	0.4054	0.1357	0.2066	0.5138
119	2	midface (2)	0.0851	0.0546	0.1192	-0.0749	0.0778	0.3355	0.552	0.8785	0.5298	0.0369	0.0556	0.5064	-0.573	0.277	0.0386	0.0682	0.0998	0.4943	-0.0586	0.1177	0.6186	0.0075	0.0852	0.9294	-0.0325	0.0814	0.69	0.0243	0.1161	0.8342	-0.1445	0.1006	0.1508	0.006	0.0897	0.947	-3.6795e-05	0.0957	0.9997	-0.0469	0.1242	0.7057	0.2298	0.3601	0.5233	-0.8294	0.8357
120	2	midface (2)	-0.097	0.0609	0.1113	0.0476	0.0809	0.556	-0.2795	0.7434	0.707	-0.0288	0.0612	0.6374	-0.0594	0.2517	0.8135	0.1135	0.1136	0.3178	0.1708	0.1533	0.2653	0.1764	0.1057	0.0951	0.0567	0.0906	0.5312	0.1111	0.1183	0.3476	0.2223	0.1292	0.0854	0.1045	0.1053	0.3209	0.0515	0.1158	0.6568	0.2086	0.1486	0.1606	-0.5403	0.3565	0.1297	-0.3264	0.5639
121	2	midface (2)	-0.0571	0.0585	0.3289	-0.069	0.0743	0.3531	0.8982	1.1683	0.442	-0.0486	0.0651	0.456	0.1114	0.2451	0.6496	0.0437	0.1026	0.6705	-0.0148	0.1245	0.9054	0.0488	0.0922	0.5964	0.0152	0.0921	0.8689	0.0375	0.1174	0.7493	0.0534	0.0978	0.5853	0.0538	0.0879	0.5408	0.2012	0.0958	0.0358	0.0916	0.1247	0.4629	0.2494	0.3515	0.478	0.2183	0.4994
122	2	midface (2)	-0.0489	0.0517	0.3437	0.0015	0.063	0.9815	0.7369	1.0478	0.4819	-0.0479	0.0577	0.4067	0.0284	0.2039	0.8894	0.0923	0.0898	0.3043	0.0672	0.116	0.5623	0.0554	0.0831	0.5045	-0.0334	0.0815	0.6822	-0.039	0.0974	0.6892	0.067	0.0889	0.4509	0.0011	0.0758	0.9884	0.1085	0.0838	0.1958	0.0186	0.1136	0.87	0.3276	0.3131	0.2954	-0.0208	0.365
123	2	midface (2)	-0.0803	0.0633	0.2049	-0.0754	0.0915	0.4102	-0.2403	0.6425	0.7084	-0.0853	0.0605	0.1589	0.0577	0.2555	0.8213	0.0415	0.1065	0.6964	0.0419	0.1499	0.7798	-0.0069	0.0997	0.9447	0.1144	0.0984	0.2449	0.0475	0.1192	0.6904	0.1477	0.1179	0.2104	0.047	0.093	0.6132	0.2413	0.1131	0.0329	0.1601	0.1488	0.282	0.7526	0.4551	0.0982	0.0899	0.4829
124	2	midface (2)	-0.0599	0.0815	0.4621	-0.0404	0.0902	0.6546	-0.2099	0.7245	0.7721	-0.0814	0.0803	0.3108	-0.6999	0.3584	0.0508	0.1351	0.1271	0.2875	0.0044	0.1693	0.9791	0.2498	0.1252	0.046	0.0168	0.0963	0.8616	-0.0141	0.133	0.9156	0.1082	0.1282	0.3987	0.0433	0.1127	0.7007	0.1218	0.1163	0.295	-0.15	0.1559	0.3361	-0.03	0.3501	0.9316	-0.1309	0.5751
125	2	midface (2)	-0.0543	0.0768	0.4794	-0.103	0.0893	0.2487	0.7861	1.1177	0.4819	-0.0157	0.0769	0.8379	0.0881	0.2801	0.753	-0.1179	0.1338	0.3783	-0.0783	0.1775	0.6592	0.124	0.1163	0.2864	-0.0339	0.12	0.7775	0.2321	0.1306	0.0756	-0.0073	0.1306	0.9556	-0.1071	0.1285	0.4047	0.1013	0.1265	0.4232	0.1521	0.1501	0.3109	-0.0968	0.3629	0.7896	-0.4792	0.7147
126	2	midface (2)	0.0211	0.0999	0.8326	0.0285	0.0791	0.7182	0.2794	0.7745	0.7183	0.1266	0.0908	0.1631	-0.2047	0.2947	0.4873	0.1996	0.1369	0.1449	0.2052	0.2197	0.3504	-0.0923	0.1245	0.4586	0.0987	0.112	0.378	-0.0028	0.2214	0.9898	-0.0025	0.1268	0.9846	0.2076	0.1242	0.0947	-0.0977	0.1253	0.4355	0.109	0.1866	0.5589	0.118	0.3462	0.7333	0.2267	0.5563
127	2	midface (2)	-0.0343	0.0631	0.5861	-0.0323	0.0802	0.6867	-0.2842	0.7085	0.6883	0.0231	0.0633	0.7156	0.1854	0.273	0.4972	-0.0304	0.1135	0.7884	0.0493	0.1532	0.7475	0.0691	0.1105	0.5319	0.1268	0.092	0.1681	0.1962	0.1256	0.1184	0.1693	0.12	0.1582	0.0179	0.1032	0.8623	0.3246	0.1193	0.0065	0.1583	0.1415	0.2633	-0.3817	0.3956	0.3347	-0.0167	0.4625
128	3	outer face (3)	0.0185	0.0773	0.8111	-0.0101	0.0801	0.8993	0.1354	0.5752	0.8139	0.0199	0.0788	0.8008	0.4657	0.2649	0.0787	0.0552	0.1069	0.6058	-0.2733	0.1594	0.0863	0.12	0.1018	0.2388	-0.0216	0.0892	0.8085	0.0841	0.1447	0.5608	0.0895	0.0984	0.3629	-0.1163	0.1073	0.2785	0.1053	0.1046	0.3143	0.0977	0.1452	0.5011	-0.4539	0.3676	0.2169	-0.3106	0.5299
129	3	outer face (3)	-0.0183	0.0932	0.8443	0.0087	0.1324	0.9478	-0.1379	0.8799	0.8754	0.0221	0.0966	0.8192	0.6883	0.4316	0.1108	0.1104	0.1578	0.4842	-0.1212	0.2234	0.5874	0.0085	0.1596	0.9573	-0.0135	0.1363	0.9212	-0.0312	0.1791	0.8616	-0.1499	0.162	0.3549	-0.0249	0.1502	0.8683	0.0823	0.1831	0.6533	0.2056	0.1994	0.3025	-0.6445	0.6144	0.2942	0.1403	0.7028
130	3	outer face (3)	0.0423	0.0816	0.604	-0.0238	0.1011	0.8142	0.2377	0.6693	0.7225	0.071	0.0801	0.3753	0.6534	0.3323	0.0492	0.0699	0.1202	0.561	-0.2649	0.1891	0.1612	0.0854	0.1157	0.4603	0.0448	0.1022	0.6612	0.126	0.1405	0.3697	0.0398	0.119	0.7377	-0.0021	0.1114	0.9847	0.0474	0.1342	0.724	0.1392	0.1561	0.3725	-0.2224	0.4504	0.6215	-0.4919	0.6277
131	3	outer face (3)	0.0867	0.0593	0.1433	0.0055	0.0838	0.9478	0.6133	0.8204	0.4547	0.0653	0.0575	0.2559	0.4102	0.2467	0.0963	0.0689	0.1032	0.5041	-0.2359	0.1479	0.1106	0.0664	0.0946	0.4831	-0.0194	0.0843	0.818	0.1038	0.1125	0.3561	0.0551	0.1026	0.5911	0.0408	0.098	0.677	-0.0379	0.1048	0.7178	0.1224	0.1189	0.3033	-0.231	0.318	0.4676	-0.1089	0.4167
132	3	outer face (3)	0.0597	0.0919	0.5157	-0.0492	0.084	0.5581	0.0556	0.6424	0.9311	0.0222	0.091	0.8077	0.3316	0.2878	0.2491	-0.0278	0.1159	0.8104	-0.1961	0.1642	0.2322	0.1513	0.1133	0.1817	-0.0006	0.0957	0.9949	0.1412	0.1563	0.366	0.1322	0.1091	0.2259	-0.1283	0.1064	0.2281	0.2636	0.1237	0.0331	0.1071	0.1608	0.5055	-0.6584	0.4615	0.1537	-0.8615	0.8799
133	3	outer face (3)	0.0993	0.0668	0.1371	-0.0219	0.0727	0.7631	0.4384	0.7002	0.5312	0.0289	0.0658	0.6609	0.1847	0.2301	0.4223	-0.0093	0.1039	0.9283	-0.1922	0.1455	0.1866	0.1213	0.0938	0.196	-0.0492	0.0852	0.5634	0.1219	0.121	0.3138	0.1298	0.0973	0.1824	-0.0669	0.0998	0.5028	0.1489	0.0962	0.1218	0.0991	0.1234	0.4218	-0.6045	0.375	0.107	-0.474	0.568
134	3	outer face (3)	0.0353	0.0975	0.7171	-0.0483	0.1261	0.7016	-0.2644	0.9354	0.7774	0.0235	0.0987	0.8119	0.4239	0.3855	0.2716	-0.0079	0.1503	0.9582	0.0107	0.2186	0.9611	0.0343	0.1498	0.8188	0.0201	0.133	0.8799	0.0376	0.1727	0.8277	-0.101	0.163	0.5355	-0.0275	0.135	0.8387	0.2692	0.1868	0.1496	0.1939	0.1855	0.296	-0.8547	0.6449	0.1851	-0.5584	0.7833
135	3	outer face (3)	0.1488	0.0779	0.0561	-0.0394	0.0996	0.692	0.6504	0.9225	0.4808	0.081	0.0681	0.2338	0.2997	0.2798	0.284	-0.0135	0.1245	0.9134	-0.1813	0.1765	0.3043	0.1007	0.1121	0.3691	0.0039	0.1015	0.9693	0.1823	0.1373	0.1842	0.1033	0.1217	0.3958	0.0458	0.1088	0.6738	0.1188	0.127	0.3493	0.1475	0.1368	0.2809	-0.4668	0.4328	0.2808	-0.7203	0.7432
136	3	outer face (3)	0.0033	0.0672	0.9609	-0.0897	0.0935	0.3373	-0.1894	0.6985	0.7863	-0.0796	0.0693	0.2502	-0.5524	0.306	0.0711	0.0855	0.1312	0.5147	0.1224	0.162	0.4501	-0.0583	0.1223	0.6337	0.0263	0.0944	0.7807	-0.1252	0.1423	0.3789	-0.0109	0.1219	0.9288	-0.0218	0.1064	0.8379	-0.3394	0.1146	0.0031	-0.1503	0.1615	0.352	0.1217	0.3472	0.7259	0.2257	0.6404
137	3	outer face (3)	-0.0231	0.071	0.7446	0.0491	0.0872	0.5731	-0.8495	1.0903	0.4359	-0.0237	0.0798	0.7664	-0.0216	0.247	0.9302	0.0262	0.1049	0.8029	-0.0433	0.1515	0.7751	0.1109	0.1167	0.342	0.0372	0.0934	0.69	0.0291	0.1357	0.8299	-0.0176	0.1157	0.8788	0.0403	0.1061	0.7041	-0.1023	0.1133	0.3669	-0.0817	0.1571	0.603	-0.3749	0.3685	0.309	-0.2926	0.4966
138	3	outer face (3)	-0.0156	0.0661	0.813	-0.1164	0.0739	0.1153	0.7098	0.9391	0.4497	-0.0316	0.0732	0.6659	0.0275	0.2288	0.9044	0.0517	0.0962	0.5912	-0.0943	0.1304	0.4697	-0.0314	0.1026	0.7594	-0.0045	0.0845	0.9573	0.1329	0.1399	0.3421	0.0856	0.0989	0.3865	0.0498	0.0877	0.5702	-0.1854	0.091	0.0416	-0.1247	0.1333	0.3497	0.2851	0.2831	0.3139	-0.0416	0.4498
139	3	outer face (3)	-0.0337	0.0655	0.607	0.0781	0.0901	0.3861	-0.23	0.6993	0.7423	-0.012	0.0699	0.8635	0.1334	0.2619	0.6106	-0.0144	0.1189	0.9033	-0.0136	0.162	0.933	0.1412	0.1071	0.1875	-0.0042	0.0939	0.9644	-0.1879	0.1297	0.1474	-0.1349	0.123	0.2727	-0.1523	0.1167	0.192	0.099	0.1273	0.4368	0.1568	0.162	0.3332	-0.2801	0.3714	0.4507	0.9437	0.963
140	3	outer face (3)	0.0499	0.0747	0.504	0.0444	0.0903	0.6231	-0.9592	1.4017	0.4938	0.0804	0.0778	0.3013	-0.3327	0.312	0.2863	-0.0819	0.1305	0.5306	0.0358	0.1683	0.8318	-0.0785	0.1186	0.5082	-0.0254	0.1117	0.8202	0.0256	0.1508	0.8654	-0.1296	0.1596	0.417	0.0239	0.1211	0.8438	0.1733	0.1467	0.2374	-0.2154	0.1663	0.1952	0.0304	0.416	0.9417	1.1376	1.1236
141	3	outer face (3)	0.0838	0.0774	0.2789	-0.0116	0.0887	0.8957	-0.9382	1.3779	0.496	0.0776	0.0814	0.3402	-0.2113	0.2889	0.4645	-0.2558	0.146	0.0797	-0.1212	0.1713	0.4792	-0.2066	0.1376	0.1334	-0.0898	0.1157	0.4377	0.0385	0.158	0.8076	-0.1749	0.1521	0.2502	-0.0023	0.1196	0.9848	0.1451	0.1531	0.3433	-0.1125	0.1808	0.5337	-0.0276	0.3999	0.945	1.0073	1.0243
142	3	outer face (3)	-0.0364	0.0656	0.5791	0.1986	0.0996	0.0461	0.0909	0.6561	0.8898	-0.0757	0.0713	0.2884	-0.4254	0.3185	0.1817	-0.0208	0.1172	0.8594	0.1431	0.1558	0.3585	0.0257	0.1163	0.8248	-0.0675	0.0983	0.4928	-0.1568	0.1271	0.2175	-0.0692	0.1211	0.5678	0.0569	0.102	0.5764	0.1114	0.1403	0.427	-0.1254	0.1564	0.4226	0.0169	0.4334	0.9688	0.2132	0.4703
143	3	outer face (3)	-0.03	0.0622	0.6303	-0.0166	0.0919	0.8568	-0.056	0.6951	0.9358	-0.0103	0.0634	0.8706	0.4275	0.316	0.1762	0.1513	0.1197	0.206	-0.0539	0.1592	0.7349	-0.0367	0.1073	0.7326	0.2745	0.1063	0.0098	0.2812	0.1388	0.0428	0.2916	0.1275	0.0221	0.2066	0.1098	0.0599	-0.1969	0.1186	0.0968	0.0698	0.1459	0.6321	-0.0516	0.3469	0.8818	-0.4125	0.6074
144	3	outer face (3)	-0.0827	0.0823	0.315	0.0381	0.1051	0.717	0.4045	0.9552	0.672	-0.041	0.078	0.5993	0.5549	0.3934	0.1584	-0.1759	0.1685	0.2963	-0.2106	0.2062	0.3072	0.0207	0.1259	0.8695	0.0388	0.1233	0.7532	0.0212	0.1536	0.8903	0.1963	0.1618	0.2251	0.014	0.118	0.9054	0.1726	0.1425	0.2257	-0.0708	0.1858	0.7032	0.192	0.4356	0.6594	-0.625	0.8046
145	3	outer face (3)	-0.1218	0.0666	0.0674	0.038	0.0912	0.6772	-0.1049	0.6231	0.8663	-0.0942	0.0625	0.1317	0.0932	0.2564	0.7162	0.0353	0.1175	0.7638	0.0536	0.1499	0.7204	-0.0955	0.1261	0.4486	-0.018	0.0939	0.8477	0.0641	0.1243	0.606	-0.0053	0.1066	0.9606	-0.0765	0.1038	0.4612	0.0396	0.1102	0.7193	-0.1279	0.1366	0.3489	0.4407	0.3723	0.2366	0.6672	0.7218
146	3	outer face (3)	-0.124	0.0903	0.1699	0.1548	0.1358	0.2544	-0.4118	0.9663	0.67	-0.1051	0.0882	0.2334	-0.1031	0.3908	0.7919	-0.0653	0.1549	0.6732	-0.165	0.2222	0.4575	-0.0022	0.1496	0.9885	-0.0925	0.1319	0.4832	0.0014	0.1881	0.9942	-0.1271	0.1623	0.4334	0.0006	0.1312	0.9962	-0.109	0.1611	0.4987	-0.1755	0.1995	0.3788	-0.3162	0.518	0.5415	-0.4147	0.7789
147	3	outer face (3)	0.0935	0.0608	0.1242	0.1408	0.095	0.1384	-0.0801	0.6746	0.9055	0.0802	0.0672	0.2325	-0.3829	0.3061	0.2109	-0.1178	0.1137	0.3003	0.1445	0.1671	0.387	0.0317	0.1011	0.7537	0.0366	0.1068	0.7316	0.0813	0.1254	0.5165	0.0122	0.1186	0.918	-0.0131	0.1011	0.8972	0.315	0.1293	0.0148	-0.1923	0.149	0.1971	-0.1255	0.3667	0.7323	-0.2277	0.6082
148	3	outer face (3)	-0.0277	0.0642	0.6657	0.0242	0.1119	0.8288	-0.2331	0.7762	0.7639	-0.0108	0.0739	0.8834	0.695	0.41	0.0901	0.195	0.1548	0.2079	0.0474	0.1948	0.8079	-0.0269	0.1244	0.8288	0.1027	0.1305	0.4313	0.0992	0.1591	0.533	0.1602	0.1637	0.3277	-0.0053	0.1262	0.9667	-0.1919	0.1546	0.2147	0.0882	0.1937	0.6489	0.3786	0.4924	0.442	-0.634	0.7382
149	3	outer face (3)	0.0183	0.0569	0.7473	-0.0214	0.066	0.7454	0.3894	0.6891	0.572	-0.0297	0.0661	0.6535	-0.1968	0.2126	0.3547	0.0861	0.111	0.4377	0.2389	0.1367	0.0805	0.05	0.1045	0.6324	0.0108	0.0926	0.9068	-0.0269	0.1302	0.8366	0.0639	0.0986	0.5169	0.043	0.0833	0.6053	-0.0441	0.1022	0.666	-0.054	0.1282	0.6738	0.6846	0.4188	0.1022	0.0916	0.4439
150	3	outer face (3)	0.0033	0.0552	0.9526	-0.1089	0.088	0.2163	0.181	0.6634	0.785	-0.0042	0.0582	0.9429	0.0968	0.295	0.7429	-0.03	0.1188	0.8007	0.1295	0.1584	0.4138	0.1348	0.1146	0.2393	0.1076	0.1055	0.3081	0.0364	0.1393	0.794	0.124	0.1197	0.3001	-0.0723	0.1028	0.4816	-0.0465	0.1164	0.6896	0.1293	0.1535	0.3997	-0.06	0.3372	0.8587	-0.0577	0.5107
151	3	outer face (3)	0.0451	0.0564	0.4246	-0.025	0.0769	0.7451	0.1405	0.5389	0.7944	0.0267	0.0613	0.6631	0.017	0.2639	0.9487	0.0477	0.0969	0.6222	-0.0944	0.1454	0.5161	-0.0479	0.0917	0.6016	0.1444	0.0923	0.1178	0.1303	0.1319	0.3231	0.0753	0.0977	0.4406	0.0487	0.095	0.6078	-0.1807	0.0975	0.0638	0.0872	0.1327	0.5112	-0.1146	0.2775	0.6797	-0.446	0.5797
152	3	outer face (3)	0.0779	0.0523	0.1363	-0.1818	0.0782	0.0201	0.0626	0.5155	0.9033	-0.0229	0.0537	0.6702	-0.1104	0.227	0.6269	-0.0713	0.0927	0.4421	-0.043	0.1276	0.7362	-0.0939	0.08	0.2405	-0.037	0.0847	0.6626	-0.1038	0.1071	0.3325	0.0497	0.0973	0.6097	0.0491	0.0783	0.5308	-0.1861	0.107	0.0818	0.1171	0.1223	0.3382	0.0546	0.261	0.8344	-0.6891	0.681
153	3	outer face (3)	-0.0174	0.0636	0.7844	0.0009	0.0811	0.9911	-0.9903	1.3191	0.4528	0.0653	0.0682	0.3379	-0.2719	0.2713	0.3162	-0.0545	0.1295	0.6737	-0.0364	0.1654	0.8258	0.0093	0.101	0.9265	-0.0058	0.1058	0.956	0.1354	0.1315	0.3033	-0.0892	0.1218	0.4637	-0.0379	0.1116	0.7341	0.0379	0.1149	0.7418	0.0942	0.1524	0.5363	-0.351	0.3809	0.3568	-0.3869	0.6235
154	3	outer face (3)	-0.0889	0.0695	0.2012	-0.029	0.0777	0.7089	-1.0331	1.3694	0.4506	-0.0064	0.0711	0.9285	-0.0732	0.2645	0.782	-0.1768	0.1388	0.2029	-0.143	0.1681	0.3951	0.0028	0.1092	0.9798	0.0068	0.1059	0.9485	0.127	0.1482	0.3916	-0.0982	0.1346	0.4656	-0.035	0.1117	0.7541	0.0825	0.1189	0.4879	0.0668	0.1675	0.6899	-0.7418	0.4499	0.0991	-0.0106	0.5232
155	3	outer face (3)	-0.0044	0.0561	0.9381	-0.01	0.0683	0.8835	-0.3757	0.6794	0.5802	0.0705	0.0608	0.2465	0.0328	0.2424	0.8924	0.1371	0.1089	0.2081	-0.004	0.1425	0.9776	-0.0275	0.0892	0.7576	0.0076	0.0876	0.9311	0.0048	0.1141	0.9666	-0.0423	0.1009	0.6752	-4.6092e-05	0.0952	0.9996	-0.1502	0.1085	0.1661	0.1735	0.1274	0.1733	0.2475	0.3529	0.4831	0.0263	0.4343
156	3	outer face (3)	-0.0333	0.0514	0.5176	-0.0128	0.07	0.8548	0.0813	0.5851	0.8895	-0.0875	0.0543	0.1072	0.1689	0.2661	0.5257	0.0885	0.1056	0.4019	-0.0687	0.1353	0.6114	0.0299	0.1032	0.7718	0.2331	0.093	0.0122	0.1661	0.1031	0.107	0.124	0.1109	0.2633	0.2064	0.0881	0.0191	0.0344	0.112	0.7587	0.0294	0.1179	0.8033	-0.2732	0.3322	0.4108	-0.4946	0.6366
157	3	outer face (3)	-0.0749	0.0653	0.2509	0.0073	0.0823	0.9294	0.1917	0.6236	0.7585	-0.0223	0.0668	0.7387	0.1265	0.2247	0.5735	-0.0251	0.1124	0.8233	0.0432	0.1359	0.7504	0.0269	0.0913	0.7683	-0.0389	0.0869	0.6546	0.0532	0.1166	0.6485	0.022	0.1051	0.8345	-0.1007	0.0863	0.2431	0.2194	0.1087	0.0436	0.1317	0.1368	0.3357	-0.4151	0.3649	0.2553	-0.4816	0.5762
158	3	outer face (3)	-0.0129	0.0578	0.8238	-0.0413	0.0892	0.6433	0.282	0.7423	0.704	-0.0623	0.0678	0.3577	-0.0075	0.2869	0.9791	-0.0058	0.1323	0.9653	-0.2037	0.1806	0.2594	-0.0167	0.1118	0.8813	-0.1029	0.1194	0.3889	0.0623	0.1347	0.6434	0.0146	0.1359	0.9144	-0.0245	0.0987	0.8038	-0.0634	0.1308	0.628	-0.0016	0.1456	0.9912	-0.2678	0.363	0.4607	0.3266	0.6532
159	3	outer face (3)	-0.0026	0.0576	0.9633	-0.058	0.0802	0.47	0.3525	0.7015	0.6153	-0.04	0.0601	0.506	-0.2466	0.2614	0.3455	0.2659	0.1093	0.015	0.1008	0.1473	0.4938	-0.0946	0.0903	0.2949	-0.0414	0.0868	0.6332	-0.1012	0.1326	0.4454	-0.1063	0.1006	0.2906	0.0058	0.1023	0.955	-0.036	0.0979	0.7132	0.0122	0.141	0.9312	-0.0974	0.3224	0.7626	0.0623	0.4789
160	3	outer face (3)	0.0036	0.0698	0.9585	-0.0131	0.0864	0.8796	0.2762	0.7134	0.6986	-0.0194	0.0734	0.7917	-0.2415	0.3001	0.4208	0.1433	0.1248	0.251	0.129	0.1871	0.4907	-0.0398	0.114	0.727	-0.0293	0.1169	0.8021	-0.1103	0.1584	0.4861	-0.0587	0.1208	0.6274	0.0348	0.113	0.7583	0.0299	0.1208	0.8046	-0.0307	0.1591	0.8468	-0.1615	0.3968	0.684	0.3688	0.6617
161	3	outer face (3)	0.0924	0.0681	0.1752	0.0547	0.09	0.5435	0.3552	0.7673	0.6434	0.0677	0.0751	0.3669	-0.2749	0.3163	0.3848	-0.0357	0.1314	0.7861	0.0935	0.1827	0.6087	0.0582	0.1161	0.6164	-0.0812	0.1314	0.5369	-0.0695	0.1627	0.6694	-0.0161	0.1322	0.9028	-0.0059	0.1139	0.9586	0.1833	0.1261	0.146	0.0082	0.1542	0.9577	-0.226	0.4086	0.5802	-0.317	0.6611
162	3	outer face (3)	0.0119	0.0747	0.8736	-0.0551	0.1082	0.6109	0.2066	0.7522	0.7836	-0.0098	0.089	0.9119	-0.3891	0.3829	0.3095	0.1862	0.1534	0.2248	0.15	0.2168	0.489	0.023	0.1267	0.8559	-0.0864	0.1329	0.5158	-0.0739	0.1828	0.686	-0.1068	0.1471	0.4675	-0.0922	0.132	0.4847	0.1083	0.1458	0.4576	0.0834	0.187	0.6554	-0.2818	0.4625	0.5424	0.1151	0.7099
163	3	outer face (3)	-0.0337	0.0643	0.6001	-0.1656	0.0837	0.048	0.4728	0.8205	0.5645	-0.0732	0.0645	0.2566	-0.1461	0.303	0.6297	-0.103	0.1245	0.4078	0.0418	0.1618	0.7963	-0.035	0.1104	0.7511	-0.0015	0.0957	0.9874	0.14	0.1192	0.2401	0.0482	0.1224	0.6936	0.0808	0.1017	0.4269	0.0383	0.1131	0.735	-0.0421	0.1383	0.7609	-0.2289	0.35	0.5131	-0.3372	0.5685
164	3	outer face (3)	0.067	0.0756	0.3755	0.0698	0.1009	0.4893	-0.7164	0.9693	0.4598	0.0027	0.0745	0.9714	-0.5139	0.338	0.1284	0.1302	0.1366	0.3404	0.2376	0.1744	0.1729	0.1548	0.1118	0.1662	0.125	0.1175	0.2873	-0.0163	0.1507	0.914	0.0121	0.133	0.9277	0.0273	0.1166	0.8147	0.083	0.1172	0.4789	0.0568	0.1591	0.7209	0.3293	0.3577	0.3572	0.2048	0.5811
165	3	outer face (3)	-0.0682	0.0569	0.2303	0.1805	0.0799	0.0238	-0.1055	0.5594	0.8505	-0.0148	0.0555	0.7902	0.1707	0.2446	0.4853	0.0741	0.1026	0.4702	0.0255	0.1534	0.868	0.0817	0.0878	0.352	0.0497	0.0916	0.5872	0.1252	0.1193	0.2942	0.1131	0.1087	0.298	0.0928	0.102	0.3626	0.1468	0.1137	0.1966	0.0184	0.1214	0.8797	-0.3086	0.323	0.3393	-0.4676	0.5764
166	3	outer face (3)	-0.1237	0.0763	0.105	-0.0178	0.0926	0.8472	0.2072	0.6259	0.7407	-0.1445	0.0803	0.0719	0.0079	0.252	0.9751	0.116	0.1149	0.3128	-0.1151	0.1628	0.4794	0.0012	0.1027	0.9909	0.1642	0.0944	0.0819	0.2146	0.1409	0.1278	0.0831	0.1104	0.4518	-0.0096	0.0939	0.9185	0.0272	0.1092	0.8034	-0.1529	0.1376	0.2667	0.1876	0.3281	0.5674	0.2309	0.5048
167	3	outer face (3)	-0.0568	0.0651	0.3829	-0.0354	0.0742	0.6337	-0.3212	0.6884	0.6408	-0.074	0.0633	0.2424	0.2033	0.2527	0.421	0.0718	0.0977	0.4621	-0.1062	0.1408	0.4506	-0.055	0.0992	0.5791	-0.0135	0.0838	0.8724	-0.0493	0.1009	0.6247	-0.1334	0.0982	0.1743	0.0427	0.0837	0.6096	-0.0392	0.0942	0.6775	-0.0326	0.1301	0.8022	0.381	0.3339	0.2538	0.0378	0.5108
168	3	outer face (3)	0.0314	0.0612	0.6085	0.0383	0.0654	0.5581	0.1559	0.5143	0.7617	-0.0316	0.0581	0.5866	-0.1571	0.2491	0.5282	-0.0084	0.1094	0.9391	-0.0398	0.1373	0.7717	-0.0724	0.0894	0.4177	-0.0483	0.0882	0.5841	-0.0048	0.1093	0.9649	-0.2477	0.1026	0.0158	0.039	0.0781	0.6177	-0.0886	0.102	0.3846	-0.076	0.1294	0.5567	0.1376	0.2791	0.6221	-0.2329	0.5051
169	3	outer face (3)	-0.0013	0.0553	0.981	0.1261	0.076	0.0971	-0.8212	1.0761	0.4454	0.0479	0.0585	0.4132	-0.0288	0.228	0.8993	-0.0748	0.1031	0.4678	0.1248	0.1378	0.3649	0.033	0.0879	0.7072	-0.1493	0.09	0.0973	-0.16	0.1109	0.1489	-0.1227	0.1178	0.2975	-0.1199	0.0907	0.1862	0.272	0.1099	0.0134	-0.1546	0.1229	0.2085	0.3804	0.3483	0.2747	-0.059	0.4595
170	3	outer face (3)	0.0778	0.0748	0.298	0.091	0.0872	0.2964	-0.1899	0.723	0.7928	0.0499	0.0798	0.5316	-0.3763	0.2988	0.2078	0.0355	0.1247	0.776	0.2574	0.1705	0.1312	0.0376	0.1186	0.751	-0.1217	0.0935	0.193	-0.167	0.1456	0.2515	-0.1209	0.1161	0.298	0.1006	0.1192	0.3988	-0.0989	0.116	0.3938	-0.0869	0.1474	0.5552	0.6203	0.4277	0.1469	0.3493	0.5994
171	3	outer face (3)	0.1349	0.0676	0.0461	-0.073	0.0799	0.3609	0.1213	0.5412	0.8227	0.0638	0.0719	0.3752	-0.1627	0.2254	0.4704	0.0139	0.1047	0.8945	0.1738	0.1344	0.1961	-0.0418	0.1001	0.6765	0.1203	0.079	0.1278	0.0251	0.1486	0.8661	-0.0834	0.1011	0.4093	0.0697	0.0909	0.4433	-0.0228	0.0979	0.8157	0.2078	0.1469	0.1571	-0.1684	0.2974	0.5713	0.5053	0.6671
172	3	outer face (3)	0.0208	0.0577	0.718	0.1395	0.0792	0.0783	-0.0983	0.5561	0.8597	0.0305	0.0589	0.6045	-0.1347	0.2254	0.55	-0.0197	0.0957	0.8366	-0.1	0.1384	0.47	0.0717	0.0978	0.4635	-0.1422	0.087	0.102	-0.0489	0.1241	0.6935	-0.1126	0.111	0.3105	-0.0425	0.0863	0.6221	0.143	0.0898	0.1111	-0.025	0.1299	0.8474	0.225	0.3155	0.4756	0.1396	0.4652
173	3	outer face (3)	-0.0095	0.0452	0.8337	0.0682	0.0681	0.317	-0.3353	0.5858	0.5671	0.0229	0.0499	0.646	-0.1509	0.2029	0.4569	0.1837	0.0926	0.0473	0.0465	0.1158	0.6878	0.0247	0.072	0.732	0.079	0.0712	0.2666	0.0061	0.0824	0.9408	0.0696	0.0821	0.3964	0.0441	0.0732	0.5474	-0.0132	0.0839	0.8746	0.0313	0.1078	0.7714	-0.1099	0.2375	0.6436	0.0179	0.3798
174	3	outer face (3)	-0.0643	0.0648	0.3216	0.036	0.0698	0.6063	-0.0518	0.5388	0.9235	-0.0148	0.061	0.809	0.2155	0.2095	0.3036	0.0237	0.1098	0.8293	-0.1052	0.1429	0.4614	-0.0276	0.0968	0.7756	-0.042	0.0985	0.6701	0.1554	0.1303	0.2331	0.1018	0.1079	0.3454	-0.0111	0.0939	0.906	0.1317	0.1095	0.2287	-0.1577	0.1453	0.2776	-0.1546	0.3292	0.6387	0.0415	0.4516
175	3	outer face (3)	-0.1365	0.0786	0.0823	-0.1575	0.0884	0.075	-0.192	0.6534	0.7689	-0.1094	0.0703	0.1195	0.3403	0.29	0.2406	0.1409	0.1308	0.2815	-0.1359	0.1702	0.4248	0.1176	0.1193	0.324	0.0693	0.1196	0.5623	0.2402	0.1509	0.1113	0.2476	0.132	0.0607	0.0024	0.1127	0.9832	0.0213	0.1331	0.8728	-0.0622	0.1626	0.7019	-0.3844	0.4171	0.3567	-0.5574	0.6642
176	3	outer face (3)	0.0562	0.0638	0.3778	0.1805	0.0828	0.0293	0.5015	0.8	0.5307	0.0738	0.0629	0.2409	0.0235	0.2579	0.9275	0.1194	0.1218	0.3269	0.0572	0.1563	0.7141	0.0185	0.1002	0.8532	-0.0029	0.091	0.9743	-0.0816	0.1154	0.4798	-0.2109	0.1112	0.0579	0.0649	0.0889	0.465	0.2525	0.1078	0.0192	0.0234	0.1281	0.8552	0.1318	0.3085	0.6693	0.331	0.5472
177	3	outer face (3)	0.0729	0.0736	0.3219	-0.1072	0.1231	0.3835	-0.5233	1.045	0.6165	-0.0332	0.082	0.6859	-0.2869	0.3559	0.4203	0.1826	0.1642	0.2661	0.1178	0.2352	0.6164	0.0772	0.1469	0.5993	0.1658	0.1416	0.2417	0.0759	0.1553	0.6253	0.0562	0.1583	0.7227	0.3764	0.1956	0.0543	-0.0684	0.1648	0.6782	0.0599	0.1894	0.7516	-0.9661	0.6519	0.1383	-0.4131	0.8105
178	3	outer face (3)	-0.0655	0.0644	0.3093	0.1662	0.09	0.0648	0.0684	0.5924	0.9081	-0.0042	0.0677	0.95	-0.0357	0.2647	0.8926	-0.0036	0.1132	0.9746	-0.1237	0.1574	0.432	-0.0755	0.1118	0.4996	0.0845	0.096	0.3789	0.0197	0.1377	0.8861	-0.0856	0.1176	0.4667	0.1131	0.0993	0.2549	0.0082	0.1062	0.9382	0.0747	0.1389	0.5909	0.4383	0.3942	0.2662	0.6151	0.7206
179	3	outer face (3)	-0.0298	0.0508	0.5577	0.1274	0.0845	0.1315	-0.1571	0.5811	0.7869	-0.0578	0.0549	0.2931	-0.267	0.2422	0.2703	0.191	0.1067	0.0735	0.1138	0.1374	0.4076	0.0179	0.0909	0.8442	-0.0116	0.1011	0.9089	-0.0285	0.117	0.8072	-0.0479	0.0974	0.6232	0.0054	0.0949	0.9542	-0.2829	0.119	0.0174	-0.0818	0.1335	0.5402	-0.0422	0.3428	0.902	0.142	0.5071
180	3	outer face (3)	0.0252	0.0551	0.6469	-0.106	0.0849	0.212	-0.071	0.5137	0.8901	0.047	0.0553	0.3955	-0.3145	0.2412	0.1922	0.0622	0.094	0.5078	-0.0464	0.1369	0.7347	-0.026	0.0937	0.781	-0.0196	0.0817	0.81	-0.1363	0.11	0.2151	-0.0391	0.0992	0.6937	0.0495	0.0859	0.5645	-0.0273	0.0955	0.7752	-0.2162	0.1258	0.0856	0.0056	0.3043	0.9854	0.652	0.6695
181	3	outer face (3)	-0.0668	0.0553	0.227	0.2025	0.0911	0.0261	-0.4458	0.8448	0.5977	-0.0981	0.0612	0.1086	0.1709	0.2693	0.5258	0.1793	0.1169	0.125	0.0899	0.167	0.5903	0.1711	0.1018	0.0927	0.0625	0.0922	0.4976	-0.0243	0.1175	0.8362	-0.0226	0.1131	0.8418	0.1681	0.1113	0.1308	0.1738	0.1135	0.1258	-0.1226	0.1464	0.4024	0.1296	0.328	0.6928	-0.6577	0.8205
182	3	outer face (3)	0.0464	0.0696	0.5048	0.0782	0.0768	0.3086	0.5161	0.8163	0.5273	-0.0233	0.0697	0.7379	0.0568	0.2079	0.7847	-0.1383	0.0998	0.1656	-0.1594	0.1405	0.2566	-0.0107	0.0894	0.9043	-0.0731	0.0847	0.3882	0.0252	0.1252	0.8406	-0.1569	0.1037	0.1303	-0.1377	0.0946	0.1454	0.0466	0.0922	0.6137	0.0565	0.1407	0.6878	-0.0418	0.2901	0.8855	-0.055	0.4781
183	3	outer face (3)	-0.0338	0.0944	0.7206	0.0566	0.1238	0.6472	-1.4183	1.9637	0.4701	-0.0759	0.0906	0.4027	-0.3858	0.3911	0.3239	-0.0965	0.1958	0.6224	0.0967	0.218	0.6574	-0.0517	0.1514	0.7328	-0.0596	0.1499	0.6909	0.049	0.1883	0.7948	0.0246	0.1592	0.8774	-0.1584	0.1534	0.302	0.1053	0.1612	0.5139	-0.1381	0.2172	0.5249	0.0198	0.4156	0.9619	0.1254	0.8279
184	3	outer face (3)	-0.1166	0.0573	0.042	-0.0746	0.0712	0.295	0.1394	0.5737	0.808	-0.0791	0.0591	0.1811	0.2533	0.2585	0.327	0.1453	0.1133	0.1996	0.1148	0.1362	0.3991	0.0733	0.0955	0.4429	0.0577	0.077	0.4533	0.0856	0.1083	0.4296	0.1012	0.092	0.271	0.0396	0.0864	0.6467	0.2495	0.0969	0.01	0.1246	0.1344	0.354	-0.5141	0.3627	0.1564	-0.1317	0.4572
185	3	outer face (3)	-0.079	0.0881	0.3699	0.2263	0.1026	0.0274	-0.9251	1.303	0.4777	-0.0228	0.0914	0.8028	0.2581	0.3172	0.4158	-0.1383	0.1428	0.3327	-0.1477	0.1865	0.4282	-0.0234	0.1249	0.8513	-0.1233	0.1241	0.3203	-0.1899	0.1739	0.275	-0.0525	0.1416	0.7108	0.1102	0.1261	0.3822	0.0712	0.1452	0.6236	-0.2752	0.1721	0.1098	-0.0343	0.3912	0.9301	0.4595	0.6784
186	3	outer face (3)	0.0333	0.1164	0.7749	0.2152	0.1703	0.2063	0.3756	1.2626	0.7661	-0.0007	0.1202	0.9955	-0.1781	0.4746	0.7075	-0.0346	0.1842	0.8509	0.3834	0.2958	0.1949	-0.1154	0.1781	0.5168	-0.0419	0.1638	0.7981	0.0565	0.2062	0.7839	-0.1654	0.2061	0.4222	0.2116	0.1822	0.2457	0.4202	0.2539	0.0979	-0.0093	0.2306	0.9679	-0.022	0.6078	0.9711	1.8137	1.9763
187	3	outer face (3)	-0.0812	0.0575	0.158	-0.0215	0.0729	0.7681	-0.7326	0.974	0.452	0.0071	0.0581	0.903	-0.0534	0.2281	0.815	-0.0624	0.1058	0.5555	-0.1404	0.1331	0.2915	0.047	0.0883	0.5945	-0.1251	0.0866	0.1485	-0.1232	0.1154	0.2855	-0.0591	0.1	0.5545	0.0828	0.0991	0.4037	-0.1152	0.1004	0.2511	-0.0754	0.1375	0.5832	-0.4242	0.3656	0.246	-0.5722	0.6287
188	3	outer face (3)	-0.077	0.0666	0.2478	-0.0438	0.08	0.5843	-1.144	1.4005	0.414	-0.0678	0.0634	0.2852	-0.0879	0.2684	0.7432	-0.0632	0.1226	0.606	-0.1848	0.1573	0.2401	-0.04	0.0963	0.6781	0.0127	0.0948	0.8934	-0.0853	0.1329	0.5211	0.1322	0.1134	0.2438	0.0921	0.102	0.3666	-0.0336	0.103	0.7446	-0.1132	0.15	0.4505	-0.0384	0.3279	0.9069	-0.1722	0.4968
189	3	outer face (3)	-0.0363	0.0521	0.4858	-0.0717	0.081	0.376	0.8848	1.2513	0.4795	0.0112	0.0577	0.8454	0.0972	0.2435	0.6897	-0.1136	0.1109	0.3056	-0.0006	0.1592	0.9968	-0.1016	0.0991	0.3056	-0.1578	0.0998	0.1137	-0.1776	0.1278	0.1646	-0.0591	0.1144	0.6053	-0.1524	0.099	0.1236	-0.0946	0.1102	0.3904	0.0032	0.1204	0.979	0.5362	0.4198	0.2015	0.5545	0.636
190	3	outer face (3)	-0.0395	0.0554	0.476	-0.1319	0.0831	0.1124	0.8733	1.2242	0.4756	0.0021	0.0602	0.9719	-0.0057	0.2563	0.9822	0.0114	0.1057	0.9144	0.1272	0.1376	0.3551	-0.0399	0.1001	0.6903	0.0133	0.0875	0.8793	-0.1325	0.1119	0.2366	0.021	0.1035	0.8392	-0.1438	0.0876	0.1007	-0.0293	0.1062	0.7828	0.1555	0.1198	0.1942	0.3015	0.3481	0.3864	0.6527	0.6811
191	3	outer face (3)	0.0442	0.0586	0.4502	-0.1675	0.0818	0.0405	0.8029	1.059	0.4483	0.0449	0.0583	0.441	-0.071	0.2514	0.7775	0.0586	0.1109	0.5972	0.0154	0.1444	0.9149	-0.0371	0.0958	0.6986	0.1319	0.0842	0.117	0.0574	0.1128	0.6109	0.1298	0.1094	0.2353	-0.0215	0.0908	0.8133	-0.1464	0.1116	0.1896	0.1722	0.1386	0.2141	0.347	0.3367	0.3028	-0.0874	0.4703
192	3	outer face (3)	0.0381	0.0578	0.5099	-0.1859	0.0738	0.0117	0.0722	0.4634	0.8762	0.0198	0.0569	0.7279	0.2734	0.2504	0.2749	0.0204	0.0982	0.8354	-0.0221	0.1366	0.8712	0.0802	0.0965	0.4057	-0.022	0.0815	0.7868	-0.0391	0.1098	0.7216	0.1007	0.1067	0.3451	-0.0605	0.0842	0.4724	-0.1738	0.0922	0.0595	0.0938	0.1257	0.4557	0.175	0.296	0.5544	0.3724	0.5194
193	3	outer face (3)	0.0007	0.0502	0.9886	-0.0642	0.0791	0.417	0.5834	0.8367	0.4856	0.0121	0.0589	0.8368	0.0611	0.2378	0.7973	-0.169	0.1061	0.111	0.0388	0.1441	0.7877	0.0529	0.0869	0.5427	0.1698	0.0917	0.0641	0.231	0.1092	0.0345	0.1373	0.1014	0.1759	0.0629	0.087	0.4697	0.0954	0.1101	0.3863	0.0607	0.1348	0.6526	-0.2831	0.3014	0.3476	-0.5291	0.6814
194	3	outer face (3)	0.0271	0.0722	0.7077	0.1631	0.1088	0.1341	-0.2824	0.8029	0.725	0.0619	0.0728	0.395	0.091	0.3127	0.7711	-0.0215	0.1503	0.8864	0.1788	0.1933	0.3548	0.0049	0.1299	0.9699	-0.126	0.1245	0.3114	-0.0187	0.1583	0.9061	-0.0707	0.1344	0.5988	-0.1138	0.1125	0.3117	0.1716	0.1286	0.1819	0.0923	0.1768	0.6017	0.0904	0.3585	0.801	-0.2104	0.599
195	3	outer face (3)	0.1467	0.0742	0.048	-0.1636	0.08	0.0409	-0.1974	0.6661	0.7669	0.0842	0.0811	0.299	-0.4451	0.2515	0.0767	-0.0582	0.1118	0.6026	-0.0404	0.1626	0.8036	-0.0163	0.1075	0.8793	0.0058	0.0879	0.9477	0.0419	0.1661	0.8009	-0.0604	0.1053	0.5664	0.0597	0.1053	0.5707	-0.0693	0.1027	0.4997	-0.0046	0.1467	0.9749	0.0604	0.2931	0.8369	0.5833	0.6662
196	3	outer face (3)	-0.0057	0.0565	0.9193	-0.0287	0.0765	0.7075	0.1875	0.5518	0.734	0.0049	0.0572	0.9318	0.3698	0.3007	0.2187	-0.0701	0.1101	0.5246	-0.0821	0.1507	0.5859	0.1742	0.0964	0.0707	0.0283	0.0809	0.726	0.3101	0.1212	0.0105	0.1569	0.1051	0.1354	0.0733	0.0876	0.4023	0.2215	0.1026	0.031	-0.0281	0.1221	0.8177	-0.4344	0.3884	0.2635	-0.146	0.4749
197	3	outer face (3)	-0.1139	0.0557	0.0408	-0.0891	0.0677	0.1882	-0.2959	0.5495	0.5903	-0.0604	0.0632	0.3391	-0.0166	0.2051	0.9355	-0.0194	0.0925	0.8336	0.0008	0.1259	0.9947	0.0194	0.0911	0.8315	0.0648	0.0842	0.4419	-0.0163	0.1114	0.8835	0.1309	0.1007	0.1934	0.1764	0.0771	0.0221	-0.0617	0.0977	0.5278	-0.0656	0.1161	0.5719	0.0326	0.2664	0.9026	0.5497	0.6292
198	3	outer face (3)	0.0431	0.0794	0.5876	-0.0805	0.0883	0.3618	0.4109	0.8151	0.6142	0.0377	0.0828	0.6493	-0.4657	0.3042	0.1258	0.0761	0.1154	0.5096	0.1381	0.1574	0.3802	-0.0452	0.1165	0.6983	-0.0171	0.108	0.8741	-0.0518	0.1667	0.7562	-0.1087	0.1189	0.3605	0.023	0.1075	0.8302	-0.0146	0.1229	0.9053	-0.0249	0.1476	0.8661	-0.0121	0.3139	0.9694	0.49	0.719
199	4	philtrum (I)	0.0093	0.0805	0.9083	0.0756	0.0717	0.2922	-0.5503	0.8149	0.4995	-0.0677	0.078	0.3857	0.0986	0.2548	0.6987	0.0036	0.1125	0.9744	-0.2118	0.1424	0.1369	0.0325	0.1037	0.7539	-0.0257	0.0825	0.7557	-0.0974	0.1588	0.5398	-0.1444	0.1043	0.1662	-0.0638	0.0933	0.4936	-0.0653	0.0975	0.5027	-0.2705	0.1275	0.0338	0.1304	0.3367	0.6986	-0.758	0.8061
200	4	philtrum (I)	0.0717	0.0556	0.1974	0.0184	0.0643	0.7744	-0.4061	0.7584	0.5923	0.0357	0.0561	0.5249	-0.1547	0.2507	0.5371	-0.16	0.1162	0.1685	-0.1345	0.1514	0.3745	-0.0161	0.0911	0.8601	-0.0636	0.0866	0.4631	-0.1449	0.1125	0.1979	-0.2005	0.1049	0.0559	-0.1061	0.0838	0.2054	-0.0156	0.103	0.8796	-0.2256	0.1356	0.0961	0.0199	0.3254	0.9513	0.24	0.4397
201	4	philtrum (I)	-0.0992	0.0836	0.235	-0.0022	0.0758	0.9764	-0.2347	0.6103	0.7005	-0.1554	0.0816	0.0568	-0.1889	0.27	0.4841	-0.0344	0.1192	0.773	-0.1205	0.1565	0.4414	0.0471	0.1102	0.6689	-0.0376	0.0891	0.6729	0.0639	0.1714	0.7094	-0.0138	0.1063	0.8966	-0.1048	0.1046	0.3168	0.1728	0.1111	0.1201	-0.1076	0.1482	0.4676	-0.2574	0.3179	0.4181	0.1328	0.4318
202	4	philtrum (I)	0.0572	0.0571	0.3167	-0.0795	0.0667	0.2334	0.0418	0.5511	0.9396	0.0792	0.0543	0.1448	-0.1119	0.212	0.5974	0.0897	0.0932	0.3359	-0.0485	0.1263	0.7012	0.0895	0.076	0.2386	-0.0027	0.0746	0.9714	-0.1448	0.0982	0.1403	-0.1025	0.0861	0.2339	-0.134	0.0735	0.0682	0.0129	0.0935	0.8906	0.0753	0.1145	0.5112	0.007	0.2493	0.9776	0.1388	0.4761
203	4	philtrum (I)	-0.0737	0.0672	0.2723	-0.0837	0.0762	0.2718	-0.3899	0.6919	0.5731	-0.0517	0.0703	0.4619	-0.0817	0.2755	0.7668	0.0789	0.0998	0.4296	0.1925	0.1544	0.2125	-0.1335	0.0925	0.1489	0.1783	0.1042	0.087	0.1051	0.1417	0.4584	0.0985	0.1129	0.383	0.1801	0.1192	0.1309	0.0668	0.1018	0.5115	0.1849	0.1491	0.2149	0.3021	0.3659	0.409	-0.5556	0.6272
204	4	philtrum (I)	-0.0697	0.0673	0.3002	-0.0042	0.0992	0.9661	1.5307	1.9428	0.4308	-0.0931	0.0742	0.2096	0.1977	0.2898	0.4952	-0.1867	0.1393	0.1802	-0.1279	0.2091	0.5406	-0.0805	0.1084	0.4579	-0.2227	0.1156	0.054	0.0697	0.1298	0.5914	-0.0224	0.1281	0.8611	-0.0623	0.115	0.5882	-0.0277	0.1391	0.8419	-0.2393	0.1813	0.1867	0.6728	0.4847	0.1651	0.1164	0.6051
205	4	philtrum (I)	-0.0823	0.0574	0.1514	0.2492	0.0789	0.0016	-0.4837	0.8139	0.5523	-0.1255	0.0603	0.0374	0.1976	0.231	0.3922	0.1075	0.1023	0.2933	0.0482	0.1337	0.7182	0.0207	0.0826	0.8019	0.1728	0.087	0.047	0.0736	0.1208	0.5424	0.1034	0.1018	0.3098	0.1544	0.0984	0.1165	0.0953	0.1091	0.3823	0.1129	0.1249	0.3661	-0.1487	0.3121	0.6337	0.682	0.7066
206	4	philtrum (I)	0.0808	0.0526	0.1248	-0.0551	0.0688	0.4229	-0.226	0.5812	0.6973	0.0551	0.0567	0.3307	-0.272	0.2412	0.2594	0.1031	0.1033	0.3179	-0.0923	0.1326	0.4862	-0.066	0.0929	0.4776	0.0035	0.0776	0.964	-0.0491	0.1062	0.6441	-0.0629	0.0964	0.5143	0.101	0.0778	0.194	0.0772	0.1	0.44	-0.0377	0.112	0.7366	-0.1212	0.2729	0.6569	-0.5328	0.5411
207	4	philtrum (I)	0.0004	0.064	0.9945	0.14	0.0886	0.1142	-0.2897	0.7378	0.6945	0.0788	0.0716	0.2707	0.3898	0.2988	0.1921	0.0052	0.119	0.9651	-0.1089	0.1718	0.5262	0.0345	0.1037	0.7391	-0.0162	0.0925	0.861	0.0171	0.1293	0.8947	-0.0273	0.1179	0.8169	-0.0528	0.1089	0.6278	-0.0258	0.1175	0.8263	0.2862	0.1702	0.0926	-0.6995	0.4789	0.1441	1.5117	1.4171
208	4	philtrum (I)	0.0078	0.0552	0.8874	-0.0588	0.0689	0.3937	-0.3073	0.654	0.6384	-0.0501	0.053	0.3446	-0.4247	0.2654	0.1096	-0.0743	0.0972	0.4449	-0.0377	0.1367	0.7829	-0.1063	0.0897	0.2357	-0.0443	0.0852	0.603	-0.0659	0.0947	0.487	-0.0836	0.0955	0.3812	-0.0841	0.0797	0.2913	-0.045	0.1021	0.6594	-0.0657	0.1263	0.6027	0.1053	0.2673	0.6937	-0.0114	0.3983
209	4	philtrum (I)	-0.0309	0.0698	0.6584	-0.0689	0.0832	0.4073	-1.5855	2.0175	0.4319	-0.0581	0.0657	0.376	-0.3141	0.3043	0.3021	0.0228	0.1265	0.8569	-0.0719	0.1469	0.6244	0.0607	0.1002	0.5449	0.0964	0.102	0.3447	-0.157	0.1186	0.1857	-0.0074	0.1118	0.947	0.1163	0.1096	0.289	0.2689	0.1296	0.038	-0.0146	0.1344	0.9135	0.2741	0.3527	0.4371	-0.9425	0.8832
210	4	philtrum (I)	-0.0595	0.0722	0.4102	-0.081	0.0871	0.3519	-0.7262	1.0684	0.4967	-0.0369	0.0805	0.6467	0.0031	0.2628	0.9906	0.0119	0.1224	0.9223	-0.0401	0.1479	0.7862	0.1649	0.1038	0.1123	-0.1329	0.0908	0.1434	-0.0421	0.1545	0.7851	-0.0065	0.1119	0.954	-0.0523	0.1	0.6009	-0.0766	0.1175	0.5144	0.0019	0.1639	0.9909	-0.1026	0.3468	0.7674	0.7964	0.8121
211	4	philtrum (I)	0.1011	0.0695	0.146	-0.0548	0.088	0.5332	0.334	0.7388	0.6512	0.1053	0.0721	0.1445	0.0216	0.2724	0.9367	0.0138	0.1207	0.9087	-0.2479	0.1582	0.1171	-0.0918	0.1049	0.3815	-0.0237	0.0998	0.8123	-0.0871	0.1314	0.5073	-0.1394	0.1194	0.2429	-0.013	0.1047	0.9013	0.0069	0.1285	0.9569	0.0779	0.1583	0.6225	-0.1881	0.3463	0.5871	-0.0971	0.5383
212	4	philtrum (I)	0.1207	0.0779	0.1215	0.029	0.0838	0.7295	-0.0117	0.5799	0.9839	0.1252	0.0826	0.1297	0.1715	0.2605	0.5101	0.0462	0.1314	0.7249	0.0042	0.1767	0.9812	-0.1625	0.1076	0.1311	0.0064	0.0872	0.9414	-0.0632	0.1844	0.732	-0.0766	0.111	0.4901	0.1997	0.0932	0.0321	0.0506	0.1035	0.6249	0.0996	0.163	0.5415	0.5004	0.3496	0.1524	-0.7128	0.775
213	4	philtrum (I)	-0.003	0.0732	0.9669	-0.0061	0.0889	0.945	0.6857	0.9765	0.4825	-0.0985	0.0742	0.184	-0.0108	0.2913	0.9705	-0.0183	0.1253	0.8837	-0.0546	0.1845	0.7675	-0.0149	0.1192	0.9008	0.0053	0.1106	0.9615	0.1226	0.1378	0.3737	0.0616	0.1328	0.6427	0.0109	0.1105	0.9217	0.1752	0.1315	0.1828	-0.2051	0.1536	0.1817	-0.3627	0.4145	0.3815	0.0615	0.5248
214	5	nose (II)	-0.0645	0.1051	0.5392	-0.0934	0.1264	0.4596	1.0273	1.4297	0.4724	-0.0817	0.1059	0.4403	0.6764	0.4362	0.121	-0.0734	0.1503	0.6252	-0.4576	0.2249	0.0419	0.0351	0.1597	0.8258	0.1018	0.1374	0.4587	0.2336	0.2026	0.2491	0.0148	0.1718	0.9312	-0.0453	0.1452	0.7548	0.0882	0.1633	0.5891	-0.1795	0.2053	0.3819	0.3239	0.4309	0.4522	-0.5536	0.8143
215	5	nose (II)	-0.0442	0.0683	0.5174	-0.0924	0.0709	0.1926	0.2746	0.5973	0.6458	-0.1223	0.0679	0.0718	0.4255	0.2296	0.0638	0.0223	0.1033	0.8293	-0.1522	0.1401	0.2773	-0.1267	0.1031	0.2192	0.0797	0.0871	0.3601	-0.0533	0.1477	0.7182	-0.0284	0.1006	0.7777	0.0209	0.0944	0.8249	-0.1121	0.11	0.3079	-0.1199	0.1279	0.3488	-0.1578	0.3194	0.6212	-0.3211	0.5491
216	5	nose (II)	-0.0062	0.0763	0.9353	-0.0494	0.0771	0.5218	-0.4622	0.7827	0.5549	-0.0495	0.0736	0.5013	0.0941	0.2233	0.6733	0.1082	0.1085	0.3189	-0.2304	0.1295	0.0752	0.0383	0.105	0.715	-0.0071	0.0846	0.9326	0.0885	0.1384	0.5225	-0.1356	0.0961	0.1583	-0.0687	0.0975	0.4812	-0.1096	0.1009	0.2772	-0.3068	0.1257	0.0147	0.342	0.3443	0.3206	-0.1699	0.4828
217	5	nose (II)	0.0505	0.0664	0.4465	-0.1765	0.0917	0.0542	-0.1539	0.7048	0.8271	0.0841	0.067	0.2097	0.4212	0.3084	0.1719	-0.0522	0.134	0.697	-0.4253	0.1866	0.0226	-0.1158	0.1125	0.3035	0.0644	0.0974	0.5084	-0.0046	0.1388	0.9738	-0.166	0.1244	0.182	-0.1097	0.1055	0.2986	-0.0566	0.1328	0.6699	0.032	0.1612	0.8428	0.2414	0.3731	0.5176	0.4134	0.6336
218	5	nose (II)	0.0769	0.0633	0.2244	-0.0378	0.0765	0.6208	-0.3526	0.6499	0.5875	0.0171	0.0569	0.764	0.0151	0.2516	0.9522	-0.0203	0.1096	0.8527	0.0322	0.142	0.8209	0.0109	0.0936	0.9076	0.0329	0.0941	0.7271	0.034	0.1168	0.7707	-0.0643	0.1018	0.5274	-0.0395	0.0963	0.6813	-0.1022	0.1056	0.3331	-0.0518	0.1359	0.7032	0.3291	0.3521	0.35	-0.1849	0.522
219	5	nose (II)	-0.0314	0.0671	0.6401	-0.1247	0.0773	0.1065	-0.3851	0.7889	0.6255	-0.0495	0.0705	0.4829	-0.068	0.2462	0.7824	0.0923	0.0914	0.3127	-0.1028	0.1403	0.4638	-0.0968	0.0972	0.319	0.1359	0.0886	0.1248	-0.0212	0.131	0.8717	-0.2068	0.1056	0.0502	-0.0006	0.0923	0.9951	0.0416	0.1053	0.6928	-0.1346	0.1231	0.2745	0.47	0.3527	0.1826	0.1062	0.457
220	5	nose (II)	-0.0938	0.0878	0.2851	0.0385	0.0987	0.6964	-0.3356	0.9223	0.7159	0.0059	0.0821	0.9423	0.2805	0.34	0.4094	-0.0732	0.1633	0.6539	-0.291	0.2	0.1457	0.0161	0.1309	0.902	-0.1596	0.1249	0.2014	-0.0696	0.1653	0.6737	0.1059	0.1473	0.4721	-0.1563	0.1403	0.2652	0.2781	0.1669	0.0956	0.077	0.1956	0.6938	-0.0212	0.4535	0.9628	0.3665	0.7278
221	5	nose (II)	0.0159	0.0769	0.8361	0.1633	0.113	0.1482	-0.0522	0.8174	0.9491	0.0489	0.0911	0.5919	0.0169	0.4105	0.9672	-0.0056	0.1535	0.9709	0.1353	0.1968	0.4917	0.0391	0.1542	0.7996	-0.1222	0.133	0.3582	0.074	0.1594	0.6423	-0.1097	0.1573	0.4853	-0.0716	0.1475	0.6274	0.0075	0.165	0.9638	-0.2719	0.1908	0.1541	0.0921	0.4797	0.8477	-0.7305	0.9695
222	5	nose (II)	-0.0483	0.085	0.5699	-0.1232	0.0859	0.1514	0.7073	1.0057	0.4819	-0.1575	0.0806	0.0508	0.1	0.2413	0.6786	0.0274	0.1114	0.8061	-0.2236	0.1616	0.1665	0.0572	0.1136	0.6149	-0.0924	0.0909	0.3096	-0.0804	0.1936	0.6779	-0.1016	0.1243	0.4138	-0.0143	0.1052	0.8917	0.0253	0.1194	0.8318	-0.2948	0.1473	0.0454	0.1829	0.3605	0.6119	-0.582	0.6819
223	5	nose (II)	-0.0367	0.0528	0.4863	0.0294	0.0711	0.679	0.4337	0.7461	0.561	-0.0491	0.0544	0.367	-0.2381	0.2618	0.3631	0.0916	0.0982	0.3509	-0.0646	0.1268	0.6104	0.0198	0.0891	0.8244	0.0116	0.0809	0.8859	-0.0968	0.1148	0.399	-0.2078	0.1097	0.0583	0.0155	0.0977	0.8736	0.1249	0.1053	0.2357	-0.0919	0.1258	0.4648	0.3739	0.3305	0.2579	-0.0649	0.4288
224	5	nose (II)	-0.0093	0.0749	0.9016	-0.0108	0.0725	0.8817	0.7303	1.0111	0.4701	-0.0262	0.0768	0.7325	-0.2287	0.278	0.4106	0.1054	0.1083	0.3304	0.0523	0.1458	0.7201	0.1059	0.1056	0.3159	-0.0253	0.0889	0.7761	0.0994	0.1592	0.5324	0.1774	0.1083	0.1012	0.1033	0.0988	0.2961	0.1471	0.1052	0.1617	0.0123	0.144	0.9321	-0.057	0.3162	0.857	-0.0168	0.4497
225	5	nose (II)	0.0086	0.0708	0.9036	-0.0499	0.0805	0.5357	0.3768	0.7426	0.6118	0.0142	0.0714	0.8425	-0.2537	0.2938	0.388	0.0399	0.1193	0.7383	-0.042	0.1576	0.7896	0.059	0.1035	0.5684	-0.0044	0.0943	0.9627	0.0542	0.1513	0.7202	0.0924	0.1154	0.423	0.0027	0.1059	0.9796	0.0849	0.1256	0.4991	0.0362	0.148	0.8068	-0.1028	0.3049	0.7359	0.2956	0.506
226	5	nose (II)	0.0357	0.1051	0.734	-0.1616	0.1245	0.1943	-1.6485	2.1183	0.4364	0.0387	0.114	0.7345	0.0225	0.3945	0.9545	-0.009	0.1987	0.964	0.0968	0.2605	0.7103	-0.2477	0.1754	0.1579	-0.2103	0.1813	0.2461	-0.3502	0.2504	0.162	0.1737	0.2049	0.3967	-0.3024	0.1935	0.118	0.4468	0.2189	0.0412	-0.014	0.2696	0.9586	0.2413	0.4901	0.6225	0.6799	0.9476
227	5	nose (II)	0.0023	0.0561	0.9676	0.0525	0.0777	0.4994	-0.2199	0.7097	0.7567	0.0209	0.0577	0.7174	0.191	0.2388	0.4239	-0.0839	0.1227	0.4938	-0.1183	0.1687	0.4831	0.1497	0.097	0.1229	0.1428	0.0925	0.1228	0.1768	0.1233	0.1516	0.2056	0.114	0.0712	0.0806	0.0958	0.4	0.1246	0.1113	0.2632	0.2275	0.151	0.1318	0.3159	0.3576	0.377	-0.1735	0.4532
228	5	nose (II)	-0.0523	0.0595	0.3788	-0.0619	0.0842	0.4623	-0.0652	0.6757	0.9231	-0.0097	0.0626	0.8765	0.2701	0.2866	0.3459	-0.0324	0.1083	0.7646	-0.2014	0.1488	0.1758	0.0994	0.1021	0.3301	0.1915	0.0876	0.0289	0.2598	0.1197	0.0299	0.0963	0.1105	0.3835	0.1006	0.089	0.2582	-0.003	0.1167	0.9792	0.0791	0.1368	0.5633	0.5209	0.4071	0.2007	0.0465	0.4268
229	5	nose (II)	0.0433	0.0482	0.3688	0.0221	0.0611	0.7175	-0.4466	0.7187	0.5344	0.0457	0.048	0.3415	-0.0031	0.2212	0.9887	-0.0865	0.0855	0.3116	-0.073	0.1182	0.5371	-0.0048	0.072	0.9468	0.0553	0.0743	0.4567	0.1925	0.0973	0.048	-0.0238	0.0943	0.801	0.001	0.0752	0.9894	-0.0177	0.0803	0.8252	-0.0039	0.1046	0.97	0.3219	0.2992	0.282	-0.238	0.4083
230	5	nose (II)	-0.0594	0.066	0.3679	0.0849	0.0807	0.2929	-0.5964	0.8898	0.5027	-0.0126	0.0673	0.8517	0.0978	0.2681	0.7151	-0.0818	0.1074	0.4463	-0.1114	0.1542	0.4699	-0.0667	0.103	0.5171	-0.0472	0.0971	0.6266	-0.2469	0.1292	0.0559	0.0304	0.1177	0.7962	-0.0908	0.0995	0.3614	0.0412	0.1188	0.7287	0.067	0.1398	0.632	-0.1844	0.3825	0.6297	0.0165	0.5175
231	5	nose (II)	-0.0643	0.1174	0.584	-0.022	0.1479	0.8817	0.3081	1.166	0.7916	-0.0134	0.1271	0.9163	-0.3376	0.5117	0.5094	0.009	0.2069	0.9653	0.4964	0.3897	0.2028	0.0002	0.1939	0.9991	-0.0685	0.1722	0.6909	-0.0434	0.2445	0.859	0.2471	0.2349	0.2927	0.1125	0.1992	0.5725	0.0187	0.2072	0.9282	0.2168	0.2695	0.421	-1.1357	0.933	0.2235	-0.0619	0.955
232	5	nose (II)	0.1266	0.0652	0.0522	0.0787	0.078	0.3131	-0.4422	0.7546	0.5579	0.1019	0.0633	0.1076	-0.1234	0.2624	0.6383	-0.0221	0.1173	0.8508	0.0292	0.1497	0.8452	-0.0481	0.0964	0.6179	-0.0657	0.0952	0.4901	0.0256	0.1075	0.8117	-0.0178	0.1034	0.8637	-0.1085	0.1121	0.3333	-0.0699	0.118	0.5536	-0.3	0.1262	0.0175	-0.2594	0.3191	0.4162	0.1735	0.5546
233	5	nose (II)	-0.134	0.0659	0.0421	-0.0314	0.084	0.7088	0.3734	0.7697	0.6276	0.0062	0.0725	0.9324	-0.0703	0.2853	0.8054	0.1594	0.1187	0.1793	-0.1058	0.1617	0.513	-0.1077	0.1164	0.3548	0.0449	0.1224	0.7141	-0.0879	0.1504	0.559	0.0232	0.1269	0.855	0.099	0.1124	0.3782	-0.2055	0.1209	0.0891	0.0504	0.1562	0.7472	0.105	0.3719	0.7776	0.651	0.7499
234	5	nose (II)	0.0677	0.0649	0.2972	0.0754	0.0891	0.3975	-0.5311	0.853	0.5335	0.0168	0.0586	0.775	-0.5115	0.3108	0.0998	-0.1319	0.1053	0.2101	0.073	0.1473	0.6201	0.0443	0.0967	0.647	-0.1721	0.1029	0.0946	0.0441	0.1249	0.724	-0.1835	0.1086	0.091	-0.035	0.0982	0.7215	-0.1915	0.1219	0.1162	-0.12	0.148	0.4178	0.2344	0.3498	0.5029	0.048	0.4828
235	5	nose (II)	0.0036	0.0567	0.9488	-0.031	0.0717	0.6652	0.5435	0.836	0.5156	-0.0216	0.0552	0.6957	0.0106	0.2127	0.9601	0.1913	0.0906	0.0348	0.0434	0.1351	0.7482	0.0598	0.0864	0.4888	0.0127	0.0812	0.8758	-0.0874	0.1044	0.4025	-0.0134	0.0982	0.8917	-0.0326	0.0848	0.701	-0.0929	0.0935	0.3203	-0.1377	0.1341	0.3045	0.221	0.3222	0.4928	-0.4414	0.5315
236	5	nose (II)	0.0554	0.0926	0.5491	0.0044	0.1221	0.9713	0.1115	0.9062	0.9021	-0.0003	0.0935	0.9973	-0.1707	0.3815	0.6545	0.1232	0.1527	0.4198	0.0166	0.2117	0.9374	-0.0513	0.1305	0.6943	-0.1791	0.1405	0.2026	-0.0208	0.1913	0.9134	-0.0424	0.1601	0.7909	-0.1699	0.1424	0.2327	0.1063	0.1636	0.5158	-0.4695	0.2489	0.0593	-0.4032	0.4908	0.4113	0.2391	0.7778
237	5	nose (II)	-0.1612	0.0848	0.0573	0.0532	0.1107	0.6311	0.5475	1.0028	0.585	-0.1192	0.0826	0.149	0.0274	0.3273	0.9333	0.0962	0.1436	0.5028	0.1425	0.182	0.4337	0.1436	0.1355	0.2892	0.0833	0.1152	0.4695	0.1875	0.1573	0.2333	0.2918	0.1692	0.0847	0.1242	0.1274	0.3295	0.002	0.1486	0.989	0.3505	0.1925	0.0687	-0.3251	0.407	0.4245	-0.3733	0.7218
238	5	nose (II)	-0.0691	0.0681	0.3104	0.0114	0.0809	0.8878	0.6072	0.8902	0.4951	-0.0223	0.0715	0.7547	0.0287	0.2626	0.9131	0.0815	0.106	0.4421	-0.016	0.1413	0.9101	0.0708	0.1024	0.489	0.0455	0.0972	0.6399	0.1048	0.1292	0.4175	0.1776	0.1088	0.1027	0.1024	0.0996	0.3037	0.2344	0.1052	0.0259	0.0862	0.1324	0.5153	0.2063	0.3684	0.5755	0.3271	0.5391
239	5	nose (II)	-0.1164	0.0773	0.132	0.0121	0.1137	0.9155	-0.6558	1.0754	0.542	-0.1286	0.0734	0.0798	0.2272	0.3032	0.4535	-0.1712	0.1212	0.1578	-0.1613	0.1734	0.3523	-0.0187	0.1167	0.8729	-0.0179	0.1118	0.8725	0.0612	0.1323	0.6435	0.1613	0.125	0.1968	-0.0215	0.1053	0.8384	0.2482	0.1301	0.0565	0.1066	0.1824	0.5591	0.4065	0.4238	0.3374	0.3011	0.6186
240	5	nose (II)	-0.0078	0.0615	0.8996	-0.0442	0.0798	0.5797	-0.1533	0.6209	0.805	0.065	0.066	0.325	0.0714	0.2658	0.7881	0.0874	0.1095	0.4249	0.1178	0.1495	0.4307	0.112	0.1098	0.3074	0.157	0.0948	0.0977	0.266	0.1312	0.0426	0.2487	0.1203	0.0387	0.082	0.0988	0.4066	0.2915	0.1133	0.0101	0.1649	0.1397	0.2378	-0.1638	0.3496	0.6393	-0.2065	0.4828
241	5	nose (II)	-0.0345	0.0641	0.5907	-0.0711	0.0759	0.3493	0.3352	0.6926	0.6284	0.0269	0.0676	0.6904	-0.0736	0.2552	0.7729	-0.0371	0.1125	0.7412	0.0416	0.144	0.7726	0.1614	0.088	0.0664	0.0661	0.0804	0.4108	0.1613	0.134	0.2286	0.1638	0.1128	0.1464	0.1874	0.0895	0.0363	-0.1968	0.1119	0.0786	0.4175	0.1333	0.0017	0.0944	0.285	0.7405	-0.3852	0.5724
242	6	lower face (III)	-0.0052	0.0632	0.9342	0.018	0.0817	0.8257	-0.3215	0.6889	0.6408	0.0407	0.0644	0.5267	0.0088	0.2614	0.9732	-0.0198	0.117	0.8653	-0.1548	0.1709	0.365	0.0306	0.0972	0.7532	-0.105	0.1013	0.3	0.0442	0.1207	0.7143	-0.0501	0.1219	0.681	-0.1923	0.1048	0.0664	0.109	0.1155	0.3454	0.1718	0.1404	0.2211	-0.4974	0.4136	0.229	0.4489	0.6214
243	6	lower face (III)	-0.011	0.0733	0.881	0.051	0.0923	0.5805	-0.0251	0.6203	0.9678	0.0857	0.0718	0.2328	0.2534	0.3098	0.4134	-0.0024	0.1294	0.9853	0.0689	0.1706	0.6862	-0.1466	0.1131	0.195	0.0614	0.1153	0.5941	-0.0796	0.1488	0.5927	-0.211	0.1453	0.1465	0.0665	0.1156	0.5648	0.1681	0.1343	0.2106	0.1599	0.1477	0.2791	-0.1544	0.3882	0.6908	0.4938	0.7222
244	6	lower face (III)	0.0666	0.0687	0.3321	0.0118	0.0872	0.8921	0.361	0.6641	0.5867	0.0221	0.0563	0.6952	-0.0271	0.2839	0.924	-0.0146	0.106	0.8908	-0.0812	0.1698	0.6323	-0.0912	0.098	0.3517	-0.0336	0.0945	0.7221	-0.0225	0.1301	0.8626	-0.1242	0.1217	0.3074	0.0501	0.0973	0.6063	0.065	0.1044	0.5334	0.0263	0.128	0.8373	-0.068	0.3342	0.8389	0.3253	0.5827
245	6	lower face (III)	0.0037	0.0595	0.9499	0.0811	0.0905	0.3701	0.3624	0.7319	0.6206	-0.0401	0.0635	0.5273	-0.1972	0.3036	0.5159	0.0934	0.1175	0.4267	-0.144	0.1489	0.3334	-0.048	0.1052	0.6482	-0.136	0.0921	0.1396	-0.1397	0.1215	0.2502	-0.0361	0.1242	0.7714	-0.0337	0.089	0.705	-0.4098	0.1232	0.0009	-0.3917	0.1446	0.0067	0.6321	0.4202	0.1325	-0.5675	0.6571
246	6	lower face (III)	-0.0066	0.0794	0.9333	0.0318	0.1059	0.764	-0.8101	1.1967	0.4984	0.0442	0.083	0.5941	0.5117	0.351	0.1449	0.0354	0.1495	0.813	-0.1637	0.1935	0.3975	0.0447	0.1298	0.7304	-0.0695	0.1285	0.5887	-0.105	0.1576	0.5053	0.0088	0.1434	0.9511	0.1875	0.1401	0.1809	-0.0859	0.143	0.5481	-0.0118	0.1868	0.9495	-0.2057	0.477	0.6663	0.1877	0.6077
247	6	lower face (III)	-0.0672	0.054	0.2138	0.0181	0.0794	0.8197	0.8563	1.1604	0.4605	-0.091	0.062	0.1426	0.1356	0.2514	0.5897	0.0555	0.0998	0.5781	-0.0915	0.1263	0.4688	-0.0725	0.0988	0.463	-0.0018	0.0822	0.9826	0.0768	0.0997	0.4415	0.105	0.105	0.3173	-0.052	0.0887	0.5579	-0.0716	0.0984	0.4669	-0.1449	0.13	0.2649	0.2245	0.3298	0.4961	-0.4444	0.5623
248	6	lower face (III)	-0.0256	0.0535	0.6318	-0.0268	0.0696	0.7003	0.7067	1.0472	0.4998	-0.0997	0.0606	0.0999	-0.1834	0.2727	0.5011	-0.0554	0.1111	0.6177	0.0451	0.1378	0.7435	0.0007	0.0845	0.993	-0.0385	0.0862	0.6549	-0.0636	0.1136	0.5754	-0.0158	0.104	0.8794	0.1273	0.0862	0.1398	-0.032	0.1073	0.7658	-0.0093	0.1271	0.9414	0.0713	0.3094	0.8177	0.4517	0.5667
249	6	lower face (III)	0.0211	0.0633	0.7386	0.1678	0.0979	0.0866	-0.2079	0.7714	0.7875	-0.0012	0.069	0.9863	0.0412	0.3024	0.8915	-0.0728	0.1255	0.5618	-0.069	0.1816	0.7039	0.2259	0.1259	0.0728	-0.1448	0.1146	0.2066	-0.1758	0.1319	0.1824	-0.1142	0.1305	0.3815	-0.0827	0.1182	0.4843	0.17	0.1333	0.2023	0.0798	0.1643	0.627	-0.3172	0.4528	0.4836	0.8946	0.9894
250	6	lower face (III)	0.0301	0.0712	0.6728	0.0883	0.0875	0.3128	-0.533	0.8746	0.5422	0.1045	0.0705	0.1384	0.1545	0.3142	0.6229	-0.0478	0.1275	0.7075	-0.0058	0.1563	0.9705	0.0847	0.1138	0.4567	-0.0507	0.1011	0.6165	0.0068	0.1322	0.9592	-0.046	0.1198	0.7009	-0.0611	0.1116	0.5843	0.2267	0.1249	0.0696	0.0916	0.1443	0.5257	-0.3001	0.3349	0.3702	0.7176	0.7837
251	6	lower face (III)	0.071	0.0829	0.3919	-0.1575	0.111	0.1559	0.5773	1.0896	0.5963	0.067	0.0894	0.4537	-0.0041	0.3331	0.9902	0.213	0.1572	0.1754	0.2462	0.1953	0.2073	0.035	0.1406	0.8033	-0.0424	0.1211	0.7263	-0.1685	0.1686	0.3176	0.1075	0.1638	0.5115	-0.1127	0.1151	0.3275	-0.2187	0.151	0.1475	-0.1103	0.1794	0.5388	1.3702	0.8016	0.0874	-0.1224	0.6488
252	6	lower face (III)	-0.1511	0.0796	0.0575	0.0378	0.1013	0.7087	-0.3713	0.9137	0.6845	-0.0679	0.0747	0.3635	0.8242	0.3958	0.0373	0.3059	0.1479	0.0386	0.0434	0.1649	0.7926	-0.0162	0.1207	0.893	0.3013	0.1304	0.0208	0.2679	0.1521	0.0781	0.3082	0.1486	0.0381	0.328	0.1259	0.0092	0.0802	0.1294	0.5356	0.0106	0.1661	0.9491	-0.0105	0.4218	0.9802	-0.6769	0.7589
253	6	lower face (III)	-0.018	0.0546	0.741	-0.1671	0.0767	0.0293	1.1078	1.4114	0.4325	-0.0189	0.0545	0.7279	-0.0699	0.231	0.7624	0.0733	0.1008	0.4671	0.1208	0.1241	0.3306	-0.1587	0.0956	0.097	0.1023	0.0812	0.2078	0.0115	0.106	0.9134	-0.0438	0.0966	0.6502	0.0887	0.0898	0.3236	-0.0761	0.0965	0.4306	0.125	0.1249	0.317	0.7278	0.3999	0.0688	0.1342	0.447
254	6	lower face (III)	-0.0701	0.0672	0.2969	-0.0921	0.0899	0.3057	-0.4321	0.7819	0.5805	0.0387	0.0614	0.5291	0.0098	0.278	0.972	-0.1433	0.1137	0.2077	0.1174	0.1509	0.4367	-0.091	0.1047	0.385	0.0985	0.0962	0.3056	0.0247	0.1256	0.844	-0.0786	0.1106	0.4771	-0.0304	0.0884	0.7312	0.1418	0.1097	0.1958	0.3183	0.1511	0.0351	-0.5959	0.402	0.1383	0.2665	0.5353
255	6	lower face (III)	-0.0812	0.0589	0.1681	-0.0405	0.073	0.5791	0.4235	0.7746	0.5846	-0.1054	0.0663	0.1122	0.1419	0.2227	0.5241	0.1043	0.1052	0.3218	0.1849	0.1365	0.1755	-0.0135	0.0849	0.8734	0.057	0.0886	0.5195	0.0523	0.1316	0.6912	0.047	0.094	0.6168	0.1931	0.0922	0.0362	-0.0237	0.1058	0.8226	-0.169	0.1272	0.184	0.7464	0.4338	0.0854	0.238	0.4605
256	6	lower face (III)	0.0629	0.0647	0.3309	-0.1743	0.0938	0.0631	0.867	1.1549	0.4528	0.0418	0.0767	0.5856	-0.2647	0.2908	0.3625	-0.1275	0.1074	0.2355	-0.0419	0.1458	0.7739	-0.1497	0.108	0.1656	-0.0245	0.09	0.7854	-0.0512	0.1282	0.6894	0.0006	0.1133	0.9957	-0.0106	0.0997	0.9155	-0.0784	0.1201	0.5141	0.0571	0.1423	0.6881	0.6305	0.4431	0.1547	-0.3617	0.5883
257	6	lower face (III)	-0.0194	0.0508	0.7025	0.0172	0.0673	0.7985	0.1414	0.5279	0.7888	-0.0388	0.0546	0.4778	-0.0927	0.225	0.6803	-0.0235	0.103	0.8195	0.0494	0.1287	0.7014	0.1111	0.0897	0.2153	0.1319	0.0813	0.1047	0.1297	0.1005	0.1968	0.128	0.0992	0.1972	-0.0207	0.0879	0.8141	0.1872	0.1021	0.0669	0.0888	0.1224	0.4678	-0.1271	0.2853	0.6559	-0.2415	0.4526
258	6	lower face (III)	-0.056	0.0713	0.4316	-0.0013	0.086	0.9882	0.1038	0.6162	0.8662	-0.0097	0.0731	0.8947	0.055	0.2559	0.8298	-0.0333	0.1235	0.7873	0.041	0.1658	0.8047	-0.0391	0.0986	0.6919	0.0984	0.0971	0.311	0.143	0.1298	0.2706	0.1228	0.1186	0.3004	0.021	0.102	0.8366	0.1253	0.117	0.2841	0.0681	0.1508	0.6518	-0.2258	0.3757	0.5479	-0.2678	0.5142
259	6	lower face (III)	-0.045	0.0875	0.6075	0.0174	0.1079	0.8722	-0.2402	0.8	0.7639	0.0706	0.0956	0.4601	0.2145	0.3773	0.5697	0.0787	0.1459	0.5896	-0.1184	0.2183	0.5875	0.0592	0.1438	0.6804	0.0113	0.1249	0.9282	-0.0324	0.1727	0.8511	0.0943	0.1607	0.5572	0.191	0.1436	0.1836	-0.161	0.1634	0.3244	-0.0912	0.1937	0.6379	-0.1432	0.4421	0.7461	-0.0329	0.7497
260	6	lower face (III)	0.0846	0.1183	0.4745	-0.2389	0.1346	0.076	-0.2139	1.139	0.851	0.0738	0.1279	0.5636	-0.1764	0.4604	0.7016	-0.0046	0.1711	0.9785	0.1573	0.2486	0.5269	0.1332	0.1735	0.4427	-0.0936	0.1596	0.5576	-0.1533	0.2336	0.5117	-0.1245	0.1979	0.5292	-0.2626	0.1733	0.1298	-0.0931	0.1816	0.6082	0.1752	0.2247	0.4355	0.3167	0.612	0.6048	0.3287	0.8755
261	6	lower face (III)	0.0412	0.0702	0.5569	-0.1938	0.0885	0.0286	0.7464	1.0735	0.4869	0.041	0.0716	0.5668	-0.0701	0.3032	0.8171	-0.1382	0.1277	0.2789	0.2541	0.1776	0.1526	-0.0365	0.1037	0.7249	0.0608	0.1054	0.564	-0.128	0.1495	0.3922	0.0132	0.1259	0.9165	0.1143	0.1039	0.2712	-0.0357	0.1241	0.7737	0.0744	0.1467	0.6119	0.0109	0.3583	0.9758	0.2348	0.5625
262	6	lower face (III)	0.0527	0.0703	0.4533	0.0306	0.0932	0.7432	-0.0446	0.6556	0.9457	-0.0553	0.0715	0.4391	-0.023	0.2841	0.9354	0.025	0.1227	0.8384	-0.2626	0.18	0.1446	-0.0489	0.1001	0.6252	-0.1394	0.1056	0.1869	-0.1789	0.1166	0.1249	-0.2261	0.1208	0.0613	0.0656	0.1089	0.5466	-0.1194	0.1146	0.2971	-0.1348	0.1573	0.3916	0.6053	0.4255	0.1549	0.4552	0.6241
263	6	lower face (III)	0.0476	0.0578	0.4107	-0.1184	0.0804	0.1409	0.0645	0.6046	0.9151	-0.0224	0.0614	0.7157	0.0657	0.2703	0.8078	0.04	0.1051	0.7037	-0.0586	0.1495	0.6952	-0.0876	0.0999	0.3803	-0.0282	0.09	0.7541	-0.0843	0.1134	0.4571	-0.1729	0.0995	0.0821	0.1703	0.0954	0.0741	-0.1256	0.1038	0.2262	0.0711	0.1335	0.5945	0.3188	0.3495	0.3616	0.6322	0.6737
264	6	lower face (III)	0.0353	0.0499	0.4789	0.1293	0.0603	0.0319	0.4894	0.7175	0.4952	0.0185	0.0481	0.7002	-0.0795	0.2284	0.728	0.0903	0.0967	0.3504	-0.0734	0.1165	0.5284	-0.0465	0.0779	0.5509	-0.0747	0.0843	0.3753	-0.056	0.0932	0.5479	-0.127	0.0916	0.1657	0.0207	0.0738	0.7794	-0.1661	0.0949	0.0802	-0.1603	0.1124	0.1537	0.17	0.251	0.4982	-0.4061	0.5209
265	6	lower face (III)	-0.1282	0.0808	0.1128	-0.1233	0.1114	0.2684	-0.2043	0.683	0.7648	-0.0484	0.0703	0.491	-0.04	0.3131	0.8983	0.271	0.149	0.069	0.1225	0.195	0.53	0.1071	0.1177	0.3628	0.0249	0.1313	0.8496	-0.0393	0.1442	0.7852	0.3086	0.149	0.0384	0.0962	0.1265	0.447	-0.2221	0.157	0.1571	-0.2336	0.1802	0.195	0.5407	0.4558	0.2356	0.2231	0.6203
266	6	lower face (III)	0.0215	0.0673	0.7491	-0.0176	0.082	0.8302	1.5263	1.8718	0.4148	-0.0618	0.0684	0.3662	0.1284	0.3064	0.675	0.0248	0.1241	0.8416	0.0734	0.1732	0.6717	-0.1617	0.1134	0.154	0.0993	0.1059	0.3484	-0.0266	0.1371	0.8463	0.0312	0.1404	0.8243	0.119	0.1028	0.2474	-0.0071	0.1235	0.9543	-0.0425	0.152	0.7796	0.0139	0.3762	0.9705	-0.6508	0.8025
267	6	lower face (III)	-0.0507	0.0672	0.4506	-0.0588	0.0766	0.4429	-1.2138	1.507	0.4206	0.0087	0.0626	0.8896	-0.0959	0.2932	0.7438	-0.1314	0.1265	0.299	-0.1626	0.1555	0.2959	-0.0654	0.1037	0.5284	0.1235	0.1053	0.2411	0.0357	0.1232	0.7719	0.1333	0.1148	0.2458	0.13	0.1058	0.219	0.0405	0.1153	0.7251	-0.1461	0.1612	0.3647	0.369	0.3953	0.3505	0.0301	0.4656
268	6	lower face (III)	-0.0369	0.0688	0.5916	-0.164	0.1005	0.1026	0.7301	1.1275	0.5173	0.0268	0.0728	0.713	-0.2652	0.289	0.3588	0.008	0.1356	0.9527	0.0613	0.1628	0.7067	0.0067	0.1186	0.9547	0.0361	0.1035	0.7273	0.003	0.1306	0.9815	0.1535	0.1309	0.241	-0.0753	0.1123	0.5028	0.0156	0.1247	0.9003	0.0987	0.1552	0.5248	0.1811	0.38	0.6337	0.4432	0.687
269	6	lower face (III)	0.0528	0.0705	0.4535	-0.1648	0.0884	0.0623	-0.1604	0.7122	0.8218	0.0166	0.0717	0.8174	-0.3414	0.2861	0.2329	-0.0329	0.1085	0.7617	-0.0498	0.1618	0.7581	0.0244	0.1006	0.8088	-0.0673	0.0944	0.476	-0.0038	0.1341	0.9772	-0.1342	0.1141	0.2398	0.1766	0.1124	0.1162	-0.0039	0.1216	0.9744	-0.0092	0.1338	0.9451	0.1298	0.3171	0.6822	0.7497	0.788
270	6	lower face (III)	-0.005	0.0662	0.9402	-0.0274	0.0871	0.7534	-0.1112	0.6703	0.8682	-0.03	0.0641	0.6399	0.0721	0.3268	0.8253	-0.0762	0.1293	0.5557	0.0013	0.1768	0.994	0.1103	0.1188	0.353	-0.0188	0.0929	0.8399	0.2017	0.1391	0.1469	0.0769	0.128	0.5478	0.0725	0.0931	0.436	0.2071	0.14	0.1391	-0.1485	0.1477	0.3149	-0.6866	0.5233	0.1895	0.1386	0.5172
271	6	lower face (III)	0.0412	0.0606	0.4966	-0.0374	0.0659	0.5709	0.6756	0.9519	0.4779	-0.035	0.0677	0.605	-0.0114	0.2544	0.9643	0.182	0.0959	0.0576	0.0153	0.1189	0.8973	0.0886	0.0951	0.3516	0.0788	0.0826	0.34	0.0933	0.1312	0.4769	-0.0209	0.1018	0.837	0.0091	0.0818	0.9113	0.0297	0.0993	0.7645	0.2183	0.1262	0.0837	-0.0507	0.2917	0.862	0.1518	0.4142
272	7	upper face (IV)	-0.0232	0.0838	0.7822	-0.0627	0.0837	0.4537	-0.1186	0.7027	0.866	-0.0987	0.0878	0.2607	0.2088	0.3193	0.5133	-0.0527	0.1457	0.7175	-0.1484	0.1779	0.404	0.2211	0.136	0.104	-0.0191	0.1103	0.8626	0.1034	0.1623	0.5241	0.239	0.1431	0.0949	0.0327	0.1245	0.7926	0.3276	0.1414	0.0205	0.1075	0.1635	0.511	-0.5738	0.4898	0.2414	-0.9348	0.9655
273	7	upper face (IV)	0.0553	0.0874	0.527	-0.0417	0.1057	0.6933	0.5582	1.0135	0.5818	-0.0184	0.0868	0.8324	0.4188	0.3705	0.2583	0.0236	0.1724	0.8913	-0.1695	0.2187	0.4383	0.3141	0.1658	0.0582	0.0277	0.1272	0.8274	0.2736	0.1539	0.0754	0.2185	0.1568	0.1636	0.0892	0.1347	0.5078	0.1685	0.1697	0.3209	0.2532	0.1911	0.1852	-0.7108	0.5869	0.2259	-1.3379	1.2189
274	7	upper face (IV)	-0.028	0.0595	0.6374	-0.0701	0.0918	0.445	-0.2739	0.6784	0.6864	-0.0437	0.0612	0.4754	-0.3877	0.2785	0.1638	-0.0015	0.1197	0.9897	0.1926	0.1621	0.2349	-0.0932	0.1184	0.431	0.0263	0.0952	0.7827	-0.1553	0.1247	0.2128	0.0186	0.1171	0.8735	-0.1216	0.1146	0.2887	-0.318	0.1192	0.0076	-0.1617	0.151	0.2841	0.0874	0.3386	0.7964	0.1889	0.6033
275	7	upper face (IV)	-0.0037	0.0672	0.9566	0.3578	0.1052	0.0007	0.6929	1.1219	0.5368	0.0702	0.0733	0.3378	-0.3655	0.3335	0.273	0.068	0.1192	0.5682	0.0785	0.172	0.6481	0.1486	0.1109	0.1802	-0.0879	0.1053	0.4037	0.0155	0.1342	0.9083	0.0823	0.1237	0.506	0.0685	0.1063	0.5195	-0.0293	0.1187	0.8051	-0.2179	0.1516	0.1506	0.3516	0.3933	0.3713	-0.0675	0.6146
276	7	upper face (IV)	-0.1952	0.1057	0.0648	0.0241	0.1253	0.8472	-0.5989	1.0817	0.5798	-0.1389	0.102	0.1732	0.6385	0.4337	0.1409	-0.1738	0.1856	0.349	0.1482	0.258	0.5657	0.0779	0.1536	0.6122	-0.185	0.1569	0.2383	-0.1138	0.2079	0.5844	0.0606	0.1976	0.759	0.0442	0.1831	0.8092	-0.013	0.1634	0.9365	0.2009	0.2211	0.3635	-0.6559	0.5874	0.2642	-0.2933	0.7702
277	7	upper face (IV)	-0.0321	0.0756	0.6708	0.0424	0.1009	0.6741	0.2188	0.8298	0.792	0.0022	0.0777	0.9772	0.7526	0.3729	0.0435	-0.0625	0.1443	0.665	-0.161	0.2113	0.4461	0.0924	0.1291	0.4741	0.0045	0.1057	0.9658	0.0803	0.1581	0.6113	0.0942	0.1496	0.529	-0.103	0.1107	0.352	-0.2805	0.1334	0.0355	0.1019	0.1621	0.5295	-0.5702	0.4667	0.2218	-0.3782	0.6466
278	7	upper face (IV)	0.0545	0.0564	0.3333	0.0686	0.0672	0.3076	-0.3944	0.7467	0.5974	0.0537	0.0543	0.3225	-0.1905	0.2709	0.482	0.024	0.1092	0.826	0.0047	0.1353	0.9724	-0.1134	0.0949	0.2322	-0.0427	0.0915	0.6405	-0.1562	0.1278	0.2215	-0.1249	0.1198	0.2973	-0.0512	0.0978	0.6006	0.1502	0.1159	0.1951	-0.3001	0.14	0.0321	0.4595	0.3596	0.2013	0.4802	0.6063
279	7	upper face (IV)	0.1709	0.0752	0.0231	-0.0452	0.077	0.5568	-0.1905	0.6591	0.7725	0.1503	0.0748	0.0445	-0.3481	0.2925	0.2339	-0.0456	0.1302	0.7259	-0.0791	0.1649	0.6317	-0.2569	0.1157	0.0263	-0.0874	0.1005	0.3848	-0.172	0.1638	0.2936	-0.2466	0.1283	0.0545	-0.0454	0.1075	0.6729	0.1323	0.1304	0.3106	-0.2123	0.1701	0.2121	0.2957	0.3489	0.3968	0.65	0.718
280	7	upper face (IV)	0.0025	0.0693	0.9717	-0.0998	0.0937	0.2869	-0.7065	1.179	0.5491	-0.0151	0.0705	0.8305	-0.3551	0.3385	0.2941	-0.0233	0.1232	0.8502	-0.113	0.2004	0.5729	-0.1863	0.1164	0.1096	-0.0862	0.1079	0.4245	-0.2835	0.1363	0.0376	-0.2025	0.1256	0.1068	-0.1249	0.1135	0.2713	-0.1973	0.1336	0.1398	-0.0606	0.1688	0.7196	0.064	0.4203	0.879	0.3981	0.6798
281	7	upper face (IV)	-7.3154e-05	0.0797	0.9993	0.0532	0.1091	0.6256	-0.0462	0.7141	0.9484	0.0215	0.0796	0.7872	0.0245	0.3559	0.9452	-0.2042	0.1523	0.18	0.0093	0.1921	0.9613	0.1772	0.1274	0.1643	-0.0717	0.1168	0.5391	0.0629	0.1495	0.674	0.2091	0.1446	0.1483	-0.0152	0.1114	0.8912	0.2553	0.153	0.0952	-0.1063	0.1838	0.5629	-0.1547	0.4112	0.7067	0.0531	0.6423
282	7	upper face (IV)	-0.0683	0.0842	0.417	-0.0131	0.1006	0.8962	-0.4772	0.9623	0.62	-0.0856	0.0831	0.303	0.2704	0.3256	0.4062	0.0712	0.1465	0.6269	0.1163	0.1776	0.5127	-0.1775	0.1432	0.2154	0.1739	0.1184	0.142	0.2204	0.1557	0.157	-0.0104	0.1369	0.9397	-0.0802	0.1268	0.527	0.0793	0.1325	0.5496	-0.2243	0.179	0.2103	0.2469	0.4227	0.5591	0.8917	0.9406
283	7	upper face (IV)	-0.052	0.0783	0.5069	0.2125	0.0837	0.0111	0.4595	0.8258	0.5779	-0.0518	0.0721	0.4723	0.7063	0.3312	0.033	-0.0159	0.1263	0.9001	-0.1204	0.1619	0.4571	0.0035	0.1099	0.9749	-0.0041	0.1027	0.9679	0.0256	0.1359	0.8507	0.0841	0.1269	0.5072	-0.0232	0.1042	0.8237	-0.0596	0.1116	0.5933	-0.2723	0.1766	0.123	0.2551	0.3792	0.5011	-0.3321	0.6058
284	7	upper face (IV)	-0.0197	0.0607	0.7457	0.0207	0.0782	0.7913	0.0289	0.6376	0.9638	0.068	0.0601	0.2573	-0.097	0.2702	0.7197	-0.0138	0.1118	0.9021	0.0297	0.1641	0.8563	-0.1444	0.1049	0.1687	-0.0024	0.1039	0.9812	0.0318	0.1254	0.7997	-0.1097	0.118	0.3525	-0.0504	0.0977	0.606	0.0873	0.1292	0.4995	0.1271	0.1314	0.3335	0.3929	0.3621	0.278	-0.3933	0.6092
285	7	upper face (IV)	0.057	0.0544	0.2945	0.1157	0.0741	0.1184	-0.4743	0.7282	0.5149	0.0451	0.0558	0.4192	-0.337	0.3004	0.2619	-0.0154	0.0998	0.8775	0.1649	0.1503	0.2725	0.1177	0.0912	0.1969	-0.02	0.0849	0.8134	0.0114	0.1148	0.9208	0.0643	0.111	0.5627	-0.0302	0.0894	0.736	0.1295	0.1077	0.2294	-0.1977	0.131	0.1313	4.571e-05	0.2966	0.9999	0.3014	0.5256
286	7	upper face (IV)	-0.0698	0.0703	0.3212	0.0309	0.1015	0.7607	0.0158	0.5535	0.9772	-0.0538	0.0723	0.4568	0.8538	0.3401	0.0121	0.0402	0.1227	0.7433	0.006	0.175	0.9728	-0.0164	0.1148	0.8865	0.1062	0.1034	0.3046	0.22	0.1521	0.1479	0.2234	0.1343	0.0963	0.0426	0.1094	0.6971	-0.1438	0.1184	0.2243	0.1566	0.1668	0.3477	0.0575	0.3624	0.874	-1.4992	1.284
287	7	upper face (IV)	0.0839	0.083	0.3121	0.06	0.0934	0.5204	0.9088	1.1992	0.4486	0.0743	0.0903	0.4103	-0.4432	0.333	0.1832	0.0135	0.1449	0.926	0.2091	0.1703	0.2193	0.1707	0.1552	0.2712	-0.0823	0.1177	0.4842	-0.0795	0.1808	0.6602	0.0737	0.131	0.5738	-0.0012	0.1203	0.9923	-0.0217	0.1209	0.8577	0.265	0.1726	0.1247	0.3385	0.4101	0.4091	0.4982	0.7303
288	7	upper face (IV)	0.0749	0.0628	0.2325	0.1087	0.0824	0.187	0.4854	0.8051	0.5466	0.0664	0.0679	0.3283	0.5084	0.2912	0.0809	-0.0826	0.1132	0.4656	-0.0563	0.1363	0.6798	0.0342	0.1074	0.7502	-0.1325	0.1029	0.1978	-0.0334	0.1327	0.8015	0.1263	0.1202	0.2937	-0.0816	0.0986	0.4078	-0.0741	0.1206	0.539	0.0381	0.133	0.7746	0.1846	0.3461	0.5938	-0.3512	0.5655
289	7	upper face (IV)	0.0169	0.0615	0.7828	-0.1786	0.0922	0.0527	-0.8108	1.1458	0.4792	0.0029	0.0633	0.9635	0.0186	0.2854	0.9481	-0.0522	0.119	0.6607	0.062	0.1723	0.7191	-0.0472	0.0938	0.615	0.0244	0.1099	0.8242	0.0248	0.1309	0.8498	0.1318	0.1252	0.2925	0.0776	0.0973	0.4249	-0.1107	0.1305	0.3963	0.2355	0.1709	0.1681	-0.372	0.4011	0.3538	-0.3023	0.6283
290	7	upper face (IV)	-0.0606	0.0486	0.2128	-0.0745	0.0565	0.1877	-0.5048	0.7669	0.5104	-0.0047	0.05	0.9253	-0.0567	0.1763	0.7478	-0.0701	0.0819	0.3919	0.1021	0.1158	0.3779	-0.0138	0.0824	0.8669	0.1471	0.0733	0.0447	0.158	0.1007	0.1165	0.0742	0.0999	0.4578	-0.0166	0.083	0.8417	-0.0072	0.0933	0.9383	0.1296	0.1163	0.2651	0.0406	0.2489	0.8703	0.0571	0.395
291	7	upper face (IV)	-0.0561	0.0665	0.3994	0.0287	0.0774	0.7104	0.0966	0.6002	0.8721	0.0099	0.0655	0.8795	0.1277	0.3066	0.677	-0.0027	0.1204	0.9818	0.033	0.1656	0.842	-0.0322	0.1087	0.7668	-0.0213	0.1047	0.8386	-0.0244	0.138	0.8596	0.0583	0.1438	0.6851	-0.0543	0.1118	0.6276	-0.0578	0.1307	0.6582	0.3145	0.1539	0.041	0.2735	0.3807	0.4725	-0.1482	0.5654
292	7	upper face (IV)	0.0372	0.0634	0.5575	0.0039	0.0866	0.9641	0.0819	0.7062	0.9077	-0.0346	0.0635	0.5851	0.3074	0.2886	0.2869	0.1951	0.1183	0.099	-0.1107	0.158	0.4835	-0.0192	0.1178	0.8702	0.1886	0.1013	0.0627	0.0408	0.1213	0.7365	-0.0232	0.1356	0.8644	0.2178	0.1032	0.0348	0.0576	0.1236	0.6411	0.0876	0.1369	0.5223	-0.2083	0.3893	0.5925	-0.443	0.6974
293	7	upper face (IV)	-0.1289	0.0713	0.0704	0.0469	0.0889	0.5982	-0.9146	1.2006	0.4462	-0.0514	0.0822	0.5319	0.1567	0.2384	0.511	0.0122	0.1133	0.9146	0.0802	0.1531	0.6006	0.1196	0.1038	0.249	-0.0106	0.0959	0.9121	0.0656	0.1603	0.6821	0.1307	0.1131	0.2478	-0.1328	0.1019	0.1925	0.2517	0.1163	0.0304	0.0885	0.1565	0.572	-0.3681	0.3909	0.3463	-0.0309	0.4751
294	7	upper face (IV)	-0.0823	0.0521	0.1141	0.0436	0.0846	0.6065	0.1597	0.5286	0.7626	0.0259	0.0604	0.6687	-0.27	0.2609	0.3008	0.1152	0.0983	0.2413	0.0562	0.1055	0.5943	0.1571	0.0929	0.0906	0.071	0.0824	0.3886	0.1267	0.1071	0.2369	0.1152	0.0905	0.2028	0.0275	0.0875	0.7531	0.084	0.1061	0.4287	-0.2137	0.118	0.0702	-0.0535	0.27	0.843	0.4452	0.6103
295	7	upper face (IV)	0.0193	0.0709	0.785	0.1828	0.1048	0.0812	-0.1978	0.7263	0.7853	0.011	0.0704	0.8759	-0.5327	0.3339	0.1107	0.1993	0.1378	0.1482	0.3418	0.1988	0.0855	0.0543	0.109	0.6186	0.0188	0.1109	0.8657	0.0614	0.145	0.6722	0.0977	0.1267	0.4407	0.1201	0.1136	0.2903	0.1122	0.1258	0.3724	0.0096	0.1539	0.9503	0.0507	0.3808	0.8941	-0.0277	0.6089
296	7	upper face (IV)	-0.0179	0.0574	0.755	0.1413	0.0858	0.0997	-0.131	0.594	0.8255	-0.0348	0.0601	0.5625	-0.4203	0.264	0.1114	0.2835	0.1138	0.0128	0.2084	0.1658	0.2086	0.0028	0.0909	0.9754	0.0376	0.0919	0.6819	0.0148	0.1283	0.9082	0.0061	0.1114	0.956	0.0469	0.095	0.6218	0.0507	0.1042	0.6268	0.1207	0.1442	0.4025	-0.0574	0.3229	0.8589	0.0728	0.5109
297	7	upper face (IV)	-0.027	0.0683	0.6924	-0.1491	0.096	0.1205	-0.2043	0.7793	0.7932	-0.0627	0.0679	0.3559	0.2789	0.3205	0.3842	0.0262	0.1343	0.845	0.147	0.1779	0.4086	0.0302	0.1174	0.7967	0.1199	0.1152	0.2983	0.3268	0.1403	0.0199	0.2463	0.1463	0.0923	0.0117	0.1156	0.9194	0.0016	0.1173	0.9894	0.0016	0.147	0.9914	-0.4375	0.4139	0.2905	-0.1534	0.5962
298	7	upper face (IV)	-0.0648	0.0561	0.2485	0.2121	0.0824	0.01	0.3977	0.6899	0.5643	-0.019	0.0587	0.7461	-0.0317	0.2499	0.8989	0.0389	0.1	0.6974	-0.0446	0.1533	0.7709	0.1267	0.0944	0.1795	-0.0949	0.0996	0.3406	0.1	0.1256	0.4261	0.0689	0.0974	0.4791	-0.0223	0.0969	0.8183	0.0697	0.1109	0.5294	0.0928	0.1377	0.5002	-0.451	0.3657	0.2175	-0.4612	0.5905
299	7	upper face (IV)	0.0678	0.0687	0.3235	0.2044	0.0819	0.0125	0.1661	0.6032	0.783	0.0302	0.066	0.6466	-0.5557	0.2873	0.0531	-0.0338	0.1048	0.7472	-0.1011	0.1489	0.4971	0.0511	0.1047	0.6255	-0.114	0.0916	0.2132	-0.101	0.1288	0.4332	-0.0916	0.1068	0.3913	0.044	0.0882	0.6177	0.0149	0.1096	0.8916	-0.2888	0.1393	0.0381	0.1333	0.3166	0.6737	-0.2577	0.536
300	7	upper face (IV)	0.0656	0.0729	0.368	0.0143	0.1025	0.8888	0.1054	0.6714	0.8752	-0.0428	0.0769	0.5781	-0.4931	0.3262	0.1306	0.0979	0.1165	0.4003	0.4063	0.2051	0.0476	0.0718	0.1028	0.485	-0.0137	0.1124	0.9032	0.0381	0.1463	0.7946	0.157	0.1265	0.2147	0.115	0.1106	0.2984	0.2726	0.1294	0.0352	0.3441	0.1921	0.0733	0.2955	0.4121	0.4734	0.4793	0.6652
301	7	upper face (IV)	-0.0658	0.0721	0.3614	-0.0352	0.0878	0.6884	-1.0421	1.4498	0.4723	-0.027	0.0714	0.7053	0.0471	0.2794	0.866	0.1474	0.1338	0.2708	-0.1497	0.1716	0.3829	-0.0968	0.1149	0.3994	0.018	0.096	0.8516	-0.0577	0.1185	0.6265	-0.0993	0.1238	0.4223	0.062	0.0901	0.4914	0.0365	0.1205	0.7622	-0.1105	0.1463	0.4501	0.2674	0.366	0.4649	-0.2516	0.6741
302	7	upper face (IV)	-0.0132	0.0547	0.8094	0.0499	0.0718	0.4873	-0.9215	1.2019	0.4433	0.0773	0.0595	0.1937	0.0742	0.2595	0.7749	-0.0527	0.1121	0.6386	-0.0452	0.1583	0.775	-0.0813	0.0939	0.3864	-0.1174	0.0901	0.1924	-0.3474	0.1323	0.0086	-0.217	0.1154	0.0602	-0.1828	0.0957	0.0561	0.2232	0.1237	0.0711	-0.1143	0.1355	0.399	0.2604	0.3159	0.4096	-0.3567	0.5966
303	7	upper face (IV)	-0.154	0.0623	0.0134	0.0897	0.0685	0.1909	-0.2685	0.5935	0.6509	-0.1018	0.0615	0.0977	0.2433	0.2231	0.2756	-0.0181	0.0988	0.8547	0.053	0.1262	0.6745	0.1368	0.0848	0.1067	0.0149	0.08	0.8521	0.1922	0.1309	0.1421	0.0396	0.0923	0.6677	0.0983	0.0954	0.3032	-0.0392	0.0856	0.6471	0.0103	0.1322	0.9381	-0.2157	0.2755	0.4337	-0.4668	0.5998
304	7	upper face (IV)	-0.1447	0.1196	0.2261	0.0626	0.1384	0.6509	-0.6446	1.3456	0.6319	-0.0164	0.1026	0.8732	-0.255	0.446	0.5674	-0.3174	0.2278	0.1635	-0.0264	0.2534	0.9171	0.0524	0.1808	0.7718	-0.1407	0.1832	0.4426	0.0093	0.2066	0.9642	0.0322	0.2054	0.8754	-0.0841	0.1799	0.6399	0.2171	0.2025	0.2836	0.046	0.235	0.8446	0.3821	0.6082	0.5298	-0.4298	0.9997
305	7	upper face (IV)	0.1103	0.0825	0.1814	-0.1857	0.0999	0.0629	-0.2696	0.763	0.7238	0.0453	0.0943	0.6307	-0.3318	0.3175	0.296	0.0324	0.1425	0.8199	0.1921	0.158	0.224	-0.1365	0.1297	0.2928	0.1443	0.1078	0.1805	-0.0971	0.1744	0.5777	-0.1359	0.1256	0.2791	-0.0183	0.1216	0.8803	0.0081	0.1137	0.9433	0.2951	0.1584	0.0624	-0.2034	0.3897	0.6018	0.8501	0.9714
306	7	upper face (IV)	-0.006	0.0635	0.9246	0.085	0.1026	0.4072	0.5708	0.9306	0.5396	0.0615	0.0677	0.364	-0.1228	0.2713	0.6509	0.0023	0.1174	0.9844	-0.2008	0.1606	0.2113	0.0095	0.1028	0.9261	-0.2032	0.1031	0.0488	-0.2008	0.1394	0.1497	-0.172	0.1294	0.1837	-0.1503	0.1071	0.1607	-0.0013	0.107	0.9905	-0.1544	0.1537	0.3153	0.7436	0.4553	0.1025	0.3008	0.5392
307	7	upper face (IV)	-0.01	0.0646	0.8767	0.166	0.0915	0.0698	0.1307	0.6486	0.8403	0.0167	0.0636	0.7927	0.0946	0.3072	0.7582	-0.1117	0.136	0.4114	0.1861	0.1768	0.2927	0.0249	0.1132	0.8259	-0.1365	0.112	0.2229	-0.0152	0.1308	0.9076	0.0643	0.1266	0.6116	-0.0171	0.1089	0.8749	-0.0189	0.1161	0.8706	0.112	0.1724	0.5158	0.3652	0.3785	0.3346	-0.5125	0.7369
308	7	upper face (IV)	0.1239	0.0559	0.0266	0.0277	0.0873	0.7507	-0.0399	0.6222	0.9489	0.0742	0.0569	0.1923	-0.3135	0.2759	0.2559	-0.146	0.1115	0.1906	-0.083	0.1592	0.6019	-0.0333	0.1015	0.7427	-0.0165	0.0925	0.8585	-0.1195	0.1246	0.3375	-0.0562	0.1069	0.5989	-0.1103	0.102	0.2796	-0.2412	0.1261	0.0557	-0.1389	0.1549	0.37	-0.0366	0.3093	0.9059	-0.5798	0.6567
309	7	upper face (IV)	-0.0282	0.0531	0.5954	0.0259	0.092	0.7783	0.2264	0.6794	0.739	-0.0061	0.0622	0.9218	-0.1633	0.2455	0.5059	0.1581	0.1075	0.1416	0.0794	0.1392	0.5682	0.033	0.0871	0.7052	0.0326	0.0904	0.7185	0.0336	0.1143	0.7686	0.1462	0.1114	0.1895	-0.0154	0.0977	0.8745	-0.0477	0.1071	0.6559	0.0975	0.1391	0.4836	-0.1151	0.2932	0.6946	0.0208	0.4629
310	7	upper face (IV)	0.0107	0.0573	0.8516	0.0931	0.0851	0.274	0.0832	0.6013	0.8899	0.0107	0.059	0.8555	0.0813	0.2535	0.7484	-0.1052	0.1221	0.3887	-0.1099	0.153	0.4728	-0.1263	0.1232	0.3052	-0.0622	0.1023	0.5431	0.0282	0.1198	0.8141	-0.0571	0.1152	0.62	-0.1612	0.0985	0.1017	0.1958	0.1273	0.124	0.0874	0.1419	0.5379	-0.107	0.3846	0.7808	-0.4241	0.6256
311	7	upper face (IV)	0.1707	0.0817	0.0368	-0.1408	0.1022	0.1681	-0.615	1.0362	0.5528	0.0483	0.0836	0.564	-0.3875	0.3185	0.2238	0.3187	0.1481	0.0313	0.2456	0.1896	0.1951	-0.0343	0.1247	0.7834	0.1611	0.1325	0.224	-0.0612	0.1635	0.7079	-0.0618	0.134	0.6445	0.2303	0.1387	0.0968	0.0143	0.1445	0.9214	0.1309	0.1771	0.46	-0.2903	0.4383	0.5077	0.3155	0.7139
312	7	upper face (IV)	-0.114	0.0756	0.1317	0.0171	0.0992	0.8629	0.6752	1.0623	0.525	-0.0735	0.0787	0.35	0.2516	0.3091	0.4157	0.0546	0.1245	0.6608	-0.0689	0.1806	0.7028	-0.0453	0.1217	0.7096	0.1764	0.1222	0.149	0.136	0.1617	0.4004	-0.0726	0.1271	0.5681	0.1333	0.1197	0.2657	-0.0751	0.1264	0.5522	0.0372	0.1681	0.8247	0.1103	0.3891	0.7768	0.508	0.7584
313	7	upper face (IV)	-0.0962	0.0808	0.2339	0.1089	0.1058	0.3034	0.964	1.4091	0.4939	0.1031	0.0874	0.2385	-0.4409	0.4169	0.2902	0.0628	0.1726	0.7161	-0.0827	0.2457	0.7366	0.0448	0.1555	0.7732	-0.145	0.1534	0.3448	0.0246	0.186	0.895	-0.0778	0.1771	0.6605	-0.0353	0.1447	0.8073	0.0635	0.1654	0.701	0.2926	0.2127	0.1691	-0.2176	0.5185	0.6747	-0.2193	0.7992
314	7	upper face (IV)	-0.0994	0.0622	0.1099	0.0292	0.09	0.7454	0.1014	0.5918	0.864	-0.1149	0.0649	0.0769	-0.0483	0.2532	0.8487	0.2258	0.1121	0.0439	0.1633	0.1557	0.2944	0.0375	0.0856	0.6619	0.0174	0.096	0.8561	-0.0975	0.1252	0.4363	-0.0422	0.1124	0.7075	0.0336	0.0989	0.7344	-0.3567	0.1363	0.0089	-0.0657	0.1406	0.6404	0.1858	0.3656	0.6114	0.1035	0.5593
315	7	upper face (IV)	0.0319	0.0962	0.7402	-0.0186	0.137	0.8917	-0.4776	1.2232	0.6962	-0.0055	0.1055	0.9587	-0.1545	0.4509	0.7319	0.3534	0.2187	0.1061	-0.1787	0.2741	0.5143	-0.0982	0.1669	0.5564	-0.1886	0.1674	0.26	-0.4576	0.2885	0.1127	-0.3495	0.2464	0.1561	0.0652	0.1676	0.6972	-0.0443	0.1651	0.7883	-0.4385	0.3014	0.1456	-0.2703	0.5859	0.6445	-0.3838	1.0247
316	7	upper face (IV)	-0.0615	0.0786	0.4344	-0.0482	0.0962	0.6161	0.6118	1.0188	0.5482	0.023	0.0743	0.7566	0.3347	0.2811	0.2338	-0.1368	0.132	0.2999	-0.1605	0.1814	0.3764	0.0563	0.1089	0.6053	0.0123	0.1093	0.9103	0.1406	0.1423	0.3231	-0.0496	0.1326	0.7084	0.0452	0.1109	0.6837	-0.0542	0.1227	0.6586	0.0537	0.1818	0.7677	-0.1133	0.3607	0.7534	-0.0872	0.6075
317	7	upper face (IV)	0.0688	0.0812	0.3971	0.0044	0.105	0.9664	-0.2203	0.7688	0.7744	-0.0384	0.0763	0.6145	0.1501	0.3081	0.6261	-0.0811	0.1403	0.5635	0.0295	0.1684	0.861	-0.1265	0.1246	0.3103	0.0142	0.1212	0.9065	0.123	0.1546	0.4264	-0.0059	0.137	0.9659	-0.1037	0.1285	0.4197	0.036	0.1376	0.7938	-0.0968	0.1701	0.5692	0.4062	0.4007	0.3108	-0.5537	0.8466
318	7	upper face (IV)	-0.1212	0.0656	0.0645	-0.0431	0.0903	0.6329	0.3658	0.8049	0.6495	-0.1377	0.068	0.0428	0.3345	0.3099	0.2803	0.1508	0.1269	0.2349	0.1155	0.1723	0.5024	0.1181	0.1119	0.2912	0.0299	0.1013	0.768	0.0454	0.134	0.7347	0.1061	0.1178	0.3677	0.0403	0.1103	0.7149	0.1546	0.1234	0.2102	0.0718	0.1522	0.6372	-0.3382	0.3794	0.3728	0.5426	0.6791
319	7	upper face (IV)	-0.1374	0.1283	0.284	0.1887	0.1723	0.2733	0.0454	1.1016	0.9671	-0.013	0.1214	0.9149	0.3274	0.5153	0.5252	0.0629	0.2196	0.7745	-0.2409	0.3073	0.4332	-0.0542	0.1734	0.7545	-0.1089	0.1856	0.5576	-0.2291	0.2402	0.34	-0.0565	0.2087	0.7866	0.1486	0.1711	0.3851	0.1008	0.2107	0.6326	-0.3495	0.3076	0.2559	0.4401	0.7147	0.538	1.1925	1.509
320	7	upper face (IV)	0.0182	0.0712	0.7983	0.1637	0.094	0.0816	0.3371	0.8394	0.688	-0.0333	0.0742	0.6542	-0.4649	0.3356	0.1661	0.0249	0.1201	0.8358	0.0228	0.1676	0.8918	-0.038	0.1107	0.7311	0.0054	0.1082	0.9599	0.1107	0.152	0.4664	0.0854	0.1411	0.5452	-0.031	0.1068	0.7715	-0.1671	0.124	0.1777	-0.281	0.1634	0.0854	0.1988	0.3972	0.6168	-0.1027	0.5941
321	7	upper face (IV)	0.0378	0.0939	0.6877	0.1159	0.1115	0.2985	0.0308	0.7784	0.9685	0.0697	0.0959	0.4672	-0.3026	0.3314	0.3612	-0.0811	0.1532	0.5965	0.3696	0.1993	0.0637	-0.0243	0.1381	0.8604	-0.0595	0.1253	0.6347	0.1047	0.1749	0.5495	0.0802	0.1544	0.6033	0.1079	0.1151	0.3485	0.258	0.1476	0.0804	0.225	0.1733	0.1943	-0.1663	0.4391	0.7049	1.3788	1.3519
322	7	upper face (IV)	-0.105	0.0566	0.0635	-0.0519	0.0758	0.4941	0.3953	0.6658	0.5527	-0.0402	0.0557	0.471	0.0888	0.2376	0.7087	0.0283	0.1169	0.8084	0.2675	0.1544	0.0833	0.0592	0.0908	0.5144	0.0517	0.0915	0.5719	0.1478	0.1116	0.1856	0.1453	0.1174	0.2156	0.086	0.0883	0.33	0.1652	0.1015	0.1034	0.2135	0.1446	0.14	0.4029	0.3524	0.2528	0.4545	0.6308
323	7	upper face (IV)	-0.084	0.1163	0.4701	-0.0531	0.1355	0.6953	-0.3172	1.1033	0.7737	-0.1366	0.1309	0.2967	0.0966	0.3836	0.8012	0.0168	0.1844	0.9273	0.0731	0.2549	0.7743	-0.0644	0.1754	0.7137	0.2656	0.1826	0.1458	0.1393	0.227	0.5394	-0.0215	0.1937	0.9117	0.0041	0.156	0.9792	0.2722	0.2263	0.229	-0.0914	0.2227	0.6814	0.2006	0.5401	0.7104	0.3565	0.9298
324	7	upper face (IV)	-0.1586	0.1061	0.135	-0.1379	0.1663	0.4069	-0.7771	1.2902	0.5469	-0.1293	0.1278	0.3117	-0.0072	0.359	0.984	-0.0214	0.1722	0.9009	-0.0632	0.2351	0.7881	0.036	0.1768	0.8386	0.1096	0.1294	0.3968	0.0475	0.2989	0.8737	0.0893	0.1636	0.5851	-0.0035	0.1996	0.9861	-0.1954	0.1715	0.2546	-0.0854	0.2715	0.753	-0.2739	0.4849	0.5721	-0.9425	1.0761
325	7	upper face (IV)	0.0314	0.0643	0.6254	-0.0425	0.0948	0.6538	0.5114	0.9566	0.593	-0.0558	0.0671	0.406	0.2109	0.2864	0.4615	-0.0975	0.1224	0.4257	0.0038	0.173	0.9823	0.0614	0.1097	0.5757	0.2362	0.0989	0.0169	0.2716	0.122	0.026	0.1982	0.1146	0.0836	0.0609	0.1045	0.5602	-0.1683	0.1198	0.1601	0.1519	0.1742	0.3831	-0.0929	0.3478	0.7894	-0.5919	0.7114
326	7	upper face (IV)	-0.0742	0.0849	0.3817	0.1403	0.1186	0.2368	-0.5182	1.0139	0.6093	-0.066	0.0852	0.4385	0.0183	0.3613	0.9596	0.0536	0.1422	0.706	-0.1742	0.2004	0.3849	-0.1633	0.1437	0.2557	-0.0703	0.1226	0.5665	-0.0384	0.1644	0.8154	-0.1551	0.1537	0.313	-0.0661	0.1254	0.5979	-0.0437	0.1516	0.7734	-0.504	0.2216	0.023	-0.2583	0.5082	0.6114	-0.0234	0.6437
327	7	upper face (IV)	-0.0103	0.0638	0.8719	-0.1156	0.0862	0.1798	-0.2667	0.6024	0.6579	-0.0569	0.0643	0.3761	0.2474	0.2874	0.3893	-0.1247	0.1192	0.2956	0.0714	0.156	0.6471	0.0348	0.1051	0.7405	-0.0383	0.0918	0.6768	0.0265	0.1322	0.8411	0.2015	0.137	0.1413	-0.0408	0.0999	0.6826	-0.1804	0.1273	0.1566	0.0946	0.1542	0.5394	0.0715	0.3146	0.8203	0.3078	0.5955
328	7	upper face (IV)	0.0166	0.0555	0.7651	0.0265	0.0814	0.7448	-0.0639	0.6543	0.9222	0.0177	0.0632	0.779	0.2541	0.2647	0.3372	-0.1439	0.1245	0.2478	0.2202	0.1608	0.171	0.229	0.1099	0.0372	0.1742	0.1028	0.0901	0.2638	0.1171	0.0242	0.2224	0.1269	0.0796	0.0465	0.1151	0.6862	0.1153	0.1152	0.3169	0.1361	0.1405	0.3328	-0.062	0.3534	0.8608	-0.1903	0.5797
329	7	upper face (IV)	0.1234	0.0674	0.067	-0.0707	0.0746	0.3438	0.0765	0.5189	0.8829	0.0691	0.0713	0.3321	-0.2486	0.2394	0.2989	-0.1228	0.1006	0.2221	-0.0815	0.1414	0.5642	-0.1085	0.0993	0.2743	-0.0301	0.0791	0.7038	-0.0449	0.1445	0.756	-0.1196	0.0892	0.1799	-0.0886	0.102	0.3848	-0.0053	0.0913	0.954	-0.0348	0.1296	0.7881	-0.0925	0.2965	0.7552	0.2486	0.4987
330	8	philtrum (I)	-0.0825	0.0602	0.1702	0.0484	0.0741	0.5135	-0.7257	1.0545	0.4913	0.0031	0.054	0.9542	-0.1462	0.2441	0.5493	-0.0951	0.0999	0.3412	0.0029	0.1325	0.9826	0.0747	0.0921	0.4173	-0.0088	0.0945	0.9259	0.0151	0.1249	0.9037	0.0965	0.1118	0.3879	-0.0114	0.0949	0.9046	0.0228	0.1184	0.8473	0.0068	0.1322	0.9587	-0.1327	0.3262	0.6841	0.6325	0.7149
331	8	philtrum (I)	0.0989	0.0678	0.1445	-0.0632	0.0752	0.4006	0.1294	0.5433	0.8118	0.0013	0.0672	0.9849	0.2508	0.2622	0.3388	-0.0455	0.1088	0.6755	-0.1727	0.1491	0.2468	-0.041	0.1068	0.7015	-0.0051	0.0861	0.9525	-0.0184	0.1238	0.8819	-0.2435	0.111	0.0282	-0.1145	0.0978	0.2419	-0.0019	0.1177	0.9871	-0.1282	0.1289	0.32	0.1709	0.3438	0.6191	-0.2972	0.5804
332	8	philtrum (I)	0.0704	0.0643	0.2739	0.0927	0.0784	0.2369	0.0102	0.5729	0.9858	-0.0221	0.0731	0.762	0.154	0.2694	0.5676	-0.0219	0.1044	0.8342	0.0252	0.1478	0.8645	-0.0615	0.0955	0.5195	0.0067	0.0854	0.9373	-0.0526	0.1451	0.7168	-0.0121	0.0989	0.9024	0.1286	0.096	0.1805	0.1266	0.1001	0.2063	0.0171	0.14	0.9029	-0.037	0.2894	0.8984	-0.4517	0.559
333	8	philtrum (I)	0.0262	0.0701	0.7081	0.0195	0.0774	0.8008	0.5504	0.8594	0.5219	0.1011	0.0712	0.1554	0.001	0.2457	0.9969	-0.087	0.1118	0.4364	-0.1373	0.1559	0.3785	0.175	0.0913	0.0551	-0.0625	0.0818	0.4445	-0.0602	0.1214	0.6201	-0.1424	0.101	0.1585	-0.1428	0.0881	0.105	-0.0637	0.1086	0.5577	-0.0199	0.1437	0.8898	0.2328	0.3238	0.4721	0.0274	0.5119
334	8	philtrum (I)	-0.0439	0.0636	0.4897	0.0392	0.0768	0.6094	0.2872	0.7006	0.6819	0.0587	0.0605	0.3318	-0.0933	0.3163	0.768	-0.0345	0.1196	0.7732	0.2266	0.1623	0.1627	0.0667	0.0958	0.4868	0.0363	0.0915	0.6916	0.0008	0.1211	0.9947	-0.0455	0.1135	0.6886	-0.0134	0.0967	0.8902	-0.1441	0.1035	0.1641	0.0621	0.1371	0.6504	0.1625	0.3079	0.5976	0.3032	0.5577
335	8	philtrum (I)	0.0036	0.0673	0.9569	0.1378	0.0781	0.0775	-0.1505	0.5701	0.7918	0.1015	0.0667	0.1281	-0.0666	0.2355	0.7773	0.0369	0.1092	0.7356	0.1387	0.1298	0.2854	0.0154	0.0994	0.8773	-0.0302	0.0878	0.7306	-0.0509	0.128	0.6911	0.049	0.1086	0.6518	0.1155	0.0971	0.2345	-0.0805	0.0986	0.414	0.061	0.1409	0.6651	-0.0256	0.3538	0.9424	-0.2714	0.5048
336	8	philtrum (I)	0.0316	0.0647	0.6251	-0.0972	0.0794	0.2212	0.0853	0.5826	0.8836	0.0297	0.0669	0.6567	0.0926	0.2707	0.7322	0.0612	0.1123	0.5859	0.2048	0.1569	0.192	-0.0249	0.1026	0.8085	0.0437	0.0978	0.6546	0.0613	0.1194	0.6074	-0.0953	0.1214	0.4325	0.1609	0.0931	0.0839	0.0541	0.1145	0.6369	0.1887	0.1333	0.1571	-0.3911	0.3812	0.3049	0.2126	0.5026
337	8	philtrum (I)	0.0597	0.0648	0.3567	0.1042	0.0883	0.2382	-0.2257	0.574	0.6941	0.0547	0.0689	0.4273	0.2767	0.2581	0.2837	0.0579	0.1066	0.5873	-0.0907	0.1525	0.552	0.0438	0.0925	0.636	0.178	0.0968	0.0659	0.0332	0.1203	0.7823	-0.1527	0.0956	0.1102	0.0856	0.0986	0.3855	0.0103	0.1128	0.9269	0.0618	0.1317	0.6386	0.0969	0.3103	0.7549	-0.0828	0.5004
338	8	philtrum (I)	-0.0088	0.0603	0.8839	-0.0596	0.0742	0.4222	-0.0178	0.5923	0.9761	-0.088	0.0521	0.0915	-0.3922	0.2657	0.1399	-0.0958	0.1085	0.3774	-0.0399	0.1314	0.7614	-0.1515	0.0915	0.0976	-0.0979	0.0891	0.2718	-0.0393	0.1052	0.7091	-0.0797	0.1015	0.4321	-0.0939	0.0865	0.2779	-0.0204	0.1093	0.8519	-0.0675	0.1211	0.5769	-0.1215	0.2837	0.6683	0.0903	0.4309
339	8	philtrum (I)	-0.0404	0.0784	0.606	-0.0248	0.0864	0.7743	-0.6329	0.9576	0.5087	-0.0713	0.0785	0.3636	-0.224	0.2506	0.3713	0.0815	0.1161	0.4826	0.1498	0.1506	0.3199	0.271	0.0945	0.0041	-0.0568	0.0883	0.5203	0.0588	0.1481	0.6912	0.1295	0.1065	0.2239	0.0384	0.1013	0.705	-0.0242	0.1141	0.8322	0.1036	0.1538	0.5006	-0.3802	0.3757	0.3115	0.2726	0.5855
340	8	philtrum (I)	-0.0358	0.0809	0.6583	0.0377	0.0956	0.693	-1.0763	1.4756	0.4658	0.1082	0.0861	0.2093	0.0634	0.2854	0.8241	-0.0574	0.1316	0.6628	0.0183	0.1662	0.9121	0.2348	0.1117	0.0355	0.0234	0.1075	0.8281	0.0742	0.157	0.6366	-0.003	0.1128	0.979	0.0292	0.1118	0.7943	0.0225	0.1278	0.8599	-0.0314	0.1714	0.8548	-0.1958	0.3823	0.6086	0.3192	0.6377
341	8	philtrum (I)	0.0026	0.0723	0.9718	-0.0631	0.0888	0.4773	0.0059	0.67	0.993	-0.0031	0.0631	0.9613	-0.3431	0.2928	0.2414	-0.0245	0.1211	0.8398	0.0172	0.164	0.9166	-0.0487	0.1025	0.6348	-0.2323	0.1057	0.028	-0.0094	0.1343	0.944	0.083	0.117	0.478	-0.0922	0.1032	0.3719	-0.1023	0.1196	0.3924	-0.2267	0.152	0.136	-0.2409	0.3626	0.5065	-0.5613	0.7343
342	8	philtrum (I)	-0.012	0.0653	0.8545	-0.1534	0.0805	0.0568	0.5076	0.7845	0.5176	0.0239	0.0684	0.727	0.2267	0.2736	0.4074	0.0424	0.1055	0.6879	0.0717	0.1558	0.6452	-0.1428	0.0981	0.1453	0.0866	0.097	0.3717	-0.0144	0.1229	0.9065	-0.0571	0.1104	0.6049	0.0666	0.0949	0.4832	0.107	0.0992	0.281	0.3108	0.1478	0.0354	0.0572	0.3631	0.8748	0.3349	0.6199
343	8	philtrum (I)	-0.0968	0.0611	0.1131	-0.1159	0.0778	0.1364	-0.0534	0.5885	0.9277	0.0395	0.0613	0.5196	-0.0579	0.2586	0.8227	0.0539	0.1049	0.6075	0.0689	0.1494	0.6448	0.1045	0.0882	0.2363	0.0176	0.0857	0.8374	0.0477	0.1155	0.6799	0.1458	0.1061	0.1694	-0.0144	0.0873	0.8693	-0.047	0.1013	0.6431	0.0293	0.1267	0.8174	0.1333	0.284	0.6389	0.2712	0.5133
344	8	philtrum (I)	-0.108	0.0554	0.0514	-0.0835	0.0711	0.2401	0.04	0.5889	0.9459	-0.0367	0.0495	0.4582	-0.0026	0.2469	0.9916	0.0857	0.0969	0.3763	0.0742	0.1389	0.5931	0.056	0.0833	0.5011	0.1003	0.0843	0.2344	0.0397	0.1033	0.7007	0.1454	0.0988	0.1411	0.0369	0.0833	0.6575	-0.0237	0.1014	0.8148	0.1616	0.1242	0.193	0.1604	0.2851	0.5737	0.534	0.6279
345	8	philtrum (I)	0.0846	0.0683	0.2156	-0.0202	0.0772	0.7939	0.6247	0.8702	0.4728	0.0056	0.0725	0.9382	0.3174	0.2586	0.2197	-0.033	0.1107	0.7659	-0.0029	0.1548	0.9849	-0.0965	0.0934	0.3018	0.0104	0.0862	0.9039	-0.0352	0.1444	0.8072	-0.1523	0.1123	0.1747	0.0766	0.0911	0.4002	0.0991	0.1018	0.3305	0.0002	0.1334	0.9989	0.0237	0.3128	0.9397	-0.3236	0.4932
346	9	philtrum (I)	0.0133	0.0922	0.8849	-0.1442	0.0899	0.1088	-0.5891	1.0508	0.5751	-0.0634	0.0916	0.4886	-0.182	0.2833	0.5207	-0.0527	0.1344	0.6951	-0.1043	0.1795	0.5612	0.024	0.1208	0.8426	0.0976	0.1079	0.3656	0.0999	0.1678	0.5519	-0.1048	0.1227	0.3927	0.0161	0.1103	0.8842	0.046	0.125	0.7127	-0.4905	0.1681	0.0035	-0.4919	0.443	0.2668	0.37	0.5946
347	9	philtrum (I)	0.0195	0.0791	0.8056	-0.0623	0.0727	0.3915	-0.4507	0.884	0.6102	0.0352	0.0837	0.6742	0.3759	0.2895	0.1942	-0.1151	0.1267	0.3634	0.1722	0.1557	0.2688	-0.0259	0.105	0.8054	-0.0914	0.1004	0.3623	-0.0843	0.1564	0.5897	0.022	0.1071	0.8373	-0.0708	0.1131	0.5314	0.0537	0.1195	0.653	0.3693	0.1597	0.0208	-0.0318	0.3641	0.9305	0.8125	0.8427
348	9	philtrum (I)	-0.0762	0.0822	0.354	0.1622	0.0791	0.0403	-0.5028	0.8285	0.5439	-0.0969	0.0851	0.2546	-0.3844	0.2729	0.1591	0.076	0.1377	0.5811	-0.1225	0.1462	0.4021	0.1727	0.1108	0.119	-0.0574	0.1003	0.5673	-0.1296	0.1917	0.4988	-0.0648	0.1257	0.6064	-0.1079	0.1008	0.2843	-0.1726	0.106	0.1035	-0.3376	0.1431	0.0184	0.2567	0.414	0.5352	-1.0218	0.9868
349	9	philtrum (I)	-0.0911	0.0904	0.3139	-0.0494	0.0835	0.5543	0.1079	0.5884	0.8544	-0.1477	0.0834	0.0766	-0.124	0.2713	0.6477	-0.0766	0.12	0.5234	-0.1389	0.1634	0.3954	0.0692	0.1069	0.5177	-0.0358	0.0909	0.6939	0.1138	0.1759	0.5178	-0.0005	0.1081	0.9962	-0.0345	0.1094	0.7527	0.2325	0.124	0.0609	-0.1202	0.1461	0.4108	-0.1214	0.3138	0.6988	0.1762	0.4666
350	9	philtrum (I)	0.083	0.0631	0.188	-0.1717	0.0759	0.0236	-0.2364	0.6138	0.7002	0.0554	0.0624	0.375	-0.2751	0.2471	0.2655	0.1763	0.1016	0.0827	-0.0519	0.1362	0.7031	0.0219	0.0939	0.8159	-0.0024	0.09	0.9792	-0.2182	0.127	0.0858	-0.1598	0.0935	0.0874	-0.1468	0.0858	0.0872	0.003	0.108	0.9781	0.0525	0.1349	0.6969	-0.2754	0.3388	0.4162	0.1651	0.5286
351	9	philtrum (I)	-0.077	0.0788	0.328	0.1013	0.0966	0.2944	1.3453	1.787	0.4516	-0.0591	0.0774	0.445	-0.0052	0.3088	0.9866	-0.163	0.1482	0.2711	-0.1868	0.1907	0.3274	-0.0513	0.1218	0.674	-0.0851	0.1176	0.4696	0.2282	0.154	0.1385	0.0318	0.1295	0.8059	0.0004	0.1212	0.9975	-0.0524	0.151	0.7285	-0.2147	0.1945	0.2697	0.6234	0.504	0.2162	-0.1106	0.6709
352	9	philtrum (I)	0.0547	0.0591	0.355	0.0859	0.0821	0.2953	1.0115	1.3094	0.4398	0.0937	0.0599	0.118	0.6207	0.3159	0.0495	-0.0167	0.1168	0.8866	-0.0066	0.162	0.9677	-0.0753	0.1023	0.4619	0.0208	0.0927	0.8228	-0.0595	0.1103	0.5894	-0.247	0.1136	0.0296	-0.0145	0.1018	0.8864	-0.1269	0.1091	0.2447	0.0189	0.1429	0.8949	0.0465	0.3063	0.8793	0.4147	0.5925
353	9	philtrum (I)	-0.0491	0.0504	0.3302	0.134	0.0722	0.0635	-0.3117	0.6417	0.6272	-0.057	0.0559	0.3078	0.0231	0.2281	0.9193	-0.002	0.1094	0.9854	0.0507	0.1349	0.707	0.0841	0.0998	0.3991	0.0673	0.0833	0.4194	0.0311	0.093	0.7382	0.0392	0.1055	0.7099	0.0231	0.0835	0.7819	-0.0893	0.1037	0.3895	-0.0863	0.1201	0.4726	-0.1337	0.2887	0.6434	0.486	0.5903
354	9	philtrum (I)	0.0033	0.0704	0.9621	0.2284	0.0957	0.017	-0.6837	0.9917	0.4905	-0.0791	0.073	0.2785	0.3722	0.282	0.187	0.2172	0.1234	0.0784	0.1089	0.161	0.4989	-0.0139	0.1069	0.8966	0.266	0.1045	0.0109	0.1587	0.1322	0.2297	0.1934	0.12	0.1071	0.2562	0.1123	0.0225	0.1553	0.1195	0.1936	0.0497	0.1501	0.7406	-0.4984	0.4116	0.226	0.5028	0.6277
355	9	philtrum (I)	0.012	0.0583	0.8366	0.0334	0.0777	0.6669	0.4003	0.7462	0.5916	0.0127	0.0608	0.8341	0.3267	0.2891	0.2584	0.0084	0.0984	0.9323	-0.2466	0.1492	0.0983	-0.134	0.0981	0.172	-0.0053	0.0955	0.956	-0.0704	0.1175	0.549	-0.2688	0.1115	0.0159	0.0295	0.0916	0.7477	0.0034	0.1129	0.9759	0.053	0.1337	0.6916	0.042	0.3186	0.895	0.2369	0.5161
356	9	philtrum (I)	0.0055	0.0621	0.93	0.2149	0.0945	0.023	0.3295	0.7864	0.6752	0.1071	0.0729	0.142	0.4914	0.3207	0.1255	-0.1131	0.1322	0.3923	-0.068	0.1615	0.6738	0.085	0.1063	0.4237	-0.2126	0.1032	0.0394	0.0367	0.1261	0.7712	0.0344	0.1358	0.7998	-0.0885	0.1124	0.4308	-0.1469	0.1306	0.2609	0.1109	0.166	0.5039	-0.3051	0.4167	0.4642	0.1464	0.569
357	9	philtrum (I)	-0.0919	0.059	0.1193	-0.0022	0.0686	0.9746	-0.7179	1.0166	0.4801	-0.0619	0.0594	0.2976	-0.4643	0.2933	0.1135	-0.1116	0.1026	0.2767	0.0229	0.1424	0.8721	0.1254	0.0909	0.1678	-0.0136	0.0819	0.8684	-0.0816	0.1073	0.4468	-0.0578	0.1004	0.5648	0.0053	0.093	0.9545	0.0818	0.0948	0.3882	-0.053	0.1228	0.6664	0.2387	0.3273	0.4658	-0.681	0.7764
358	9	philtrum (I)	-0.0562	0.0677	0.4064	-0.1566	0.0732	0.0324	-0.1608	0.6466	0.8036	-0.0847	0.0712	0.2338	-0.3351	0.2757	0.2242	-0.0256	0.11	0.8162	-0.1835	0.1617	0.2565	-0.0476	0.1021	0.641	0.0188	0.0926	0.8393	0.0053	0.1194	0.9644	-0.0421	0.1114	0.7053	0.0122	0.1094	0.9113	-0.0117	0.1192	0.9216	-0.1464	0.1586	0.3559	0.2239	0.386	0.5619	-0.5571	0.6963
359	10	nose (II)	-0.0592	0.1205	0.6235	-0.1253	0.1446	0.3863	-0.0422	0.8335	0.9596	-0.1385	0.116	0.2326	0.5952	0.4369	0.1731	-0.0812	0.1738	0.6405	-0.514	0.2773	0.0638	0.1099	0.1684	0.5138	0.1173	0.146	0.4217	0.1521	0.2447	0.5341	-0.0407	0.1878	0.8283	-0.1545	0.152	0.3092	-0.0271	0.1632	0.8683	-0.0559	0.2193	0.7989	-0.0079	0.4439	0.9859	-0.3137	0.7869
360	10	nose (II)	-0.1087	0.1182	0.3574	-0.0762	0.1248	0.5414	0.1833	0.8592	0.831	-0.1969	0.1129	0.0811	0.6943	0.4278	0.1046	0.0497	0.1811	0.7839	-0.3627	0.2337	0.1206	0.1203	0.1623	0.4586	-0.0049	0.1471	0.9737	0.0649	0.2442	0.7905	-0.026	0.1726	0.8803	-0.1027	0.156	0.5106	-0.0288	0.1733	0.8678	-0.2268	0.2047	0.2678	0.3265	0.4887	0.5041	-0.54	0.8538
361	10	nose (II)	0.0127	0.0889	0.8863	-0.0415	0.0907	0.647	-0.2229	0.6449	0.7296	-0.0748	0.0879	0.3947	0.3649	0.2804	0.1932	0.0395	0.1164	0.7345	-0.245	0.1547	0.1133	0.1205	0.1078	0.2636	0.1098	0.096	0.2528	0.188	0.1621	0.2462	-0.066	0.1238	0.594	-0.1199	0.0999	0.2303	0.0317	0.1102	0.7734	-0.0872	0.1569	0.5785	-0.1113	0.3194	0.7274	-0.1171	0.5516
362	10	nose (II)	-0.042	0.1098	0.7021	-0.0793	0.1081	0.4633	0.1416	0.7558	0.8514	-0.1729	0.0982	0.0784	0.359	0.3263	0.2713	0.1061	0.1721	0.5376	-0.265	0.2044	0.1948	0.0988	0.1425	0.4882	0.0664	0.1238	0.5914	0.1566	0.2154	0.4671	-0.1132	0.1588	0.4756	-0.1053	0.133	0.4287	0.0445	0.1435	0.7564	-0.2628	0.1894	0.1654	0.2314	0.4079	0.5706	-0.3849	0.7362
363	10	nose (II)	0.0217	0.0513	0.6716	-0.002	0.0664	0.9755	-0.0267	0.4916	0.9567	0.0004	0.0512	0.994	0.2364	0.2303	0.3045	0.02	0.0985	0.8391	-0.0745	0.1438	0.6043	-0.0687	0.0862	0.4252	-0.1338	0.0878	0.1274	-0.1761	0.1016	0.083	-0.0596	0.0989	0.5466	-0.1132	0.0866	0.1912	0.0205	0.1017	0.84	-0.1361	0.1255	0.2782	0.1801	0.2936	0.5396	0.0506	0.4502
364	10	nose (II)	-0.0338	0.0513	0.5094	0.0305	0.0642	0.6348	-0.4694	0.7679	0.541	-0.0407	0.055	0.4586	-0.0525	0.2194	0.8109	-0.0397	0.0877	0.6507	-0.0943	0.1212	0.4365	-0.2693	0.0862	0.0018	0.0844	0.0805	0.2943	-0.0387	0.1009	0.7009	-0.1568	0.1041	0.132	0.1551	0.0886	0.0798	0.0353	0.0973	0.7165	-0.0197	0.1044	0.8499	0.1926	0.2626	0.4635	0.4169	0.5624
365	10	nose (II)	-0.0468	0.0511	0.3594	-0.0183	0.0599	0.7607	0.0801	0.3688	0.8282	-0.0346	0.0482	0.4728	0.1998	0.1999	0.3174	0.0477	0.089	0.5918	-0.2427	0.1146	0.0342	0.0479	0.0726	0.5094	0.032	0.068	0.6376	-0.0161	0.0953	0.8657	0.0656	0.0871	0.4516	-0.086	0.0754	0.2541	0.0952	0.0835	0.2543	-0.1075	0.1122	0.3381	-0.1468	0.2811	0.6016	0.5651	0.6157
366	10	nose (II)	0.0514	0.0623	0.4091	0.0351	0.0773	0.6497	-0.7672	1.1691	0.5117	-0.0121	0.0675	0.8573	0.6492	0.301	0.031	-0.2429	0.1154	0.0353	-0.3925	0.1348	0.0036	-0.219	0.102	0.0318	0.0844	0.0863	0.3279	0.0795	0.1226	0.5166	-0.0288	0.1111	0.7959	-0.087	0.0965	0.3672	0.0324	0.1119	0.7722	-0.1385	0.1303	0.288	-0.2076	0.3668	0.5713	-0.3354	0.5655
367	10	nose (II)	-0.0163	0.0638	0.7979	-0.0992	0.0868	0.2531	-0.1297	0.6062	0.8306	0.0526	0.0646	0.4157	0.1341	0.2667	0.6151	0.0952	0.1219	0.4347	0.368	0.1622	0.0233	0.2007	0.1037	0.0529	0.067	0.0984	0.4958	0.1485	0.1186	0.2106	0.1966	0.1231	0.1101	0.1266	0.096	0.1874	0.1513	0.0955	0.1132	0.5251	0.1599	0.001	-0.086	0.3309	0.7949	-0.2953	0.5639
368	10	nose (II)	-0.0758	0.0489	0.1213	-0.0254	0.0668	0.7034	-0.3895	0.7245	0.5908	-0.0438	0.0546	0.4224	0.189	0.2402	0.4313	-0.0068	0.0904	0.9396	-0.1898	0.1135	0.0944	-0.098	0.0832	0.2388	0.0937	0.078	0.2297	0.1589	0.0969	0.1008	0.0938	0.0956	0.3266	0.1446	0.0787	0.0661	-0.0995	0.0904	0.2709	0.0516	0.1004	0.6075	0.3573	0.3095	0.2483	0.2416	0.4342
369	10	nose (II)	0.0189	0.0555	0.7338	0.08	0.0726	0.271	0.3829	0.7966	0.6308	-0.0298	0.0592	0.615	-0.0962	0.2691	0.7207	0.1559	0.1256	0.2143	0.199	0.1496	0.1833	-0.0042	0.105	0.9678	-0.1369	0.0985	0.1644	-0.1454	0.1075	0.1761	-0.1764	0.1148	0.1243	-0.0911	0.0952	0.339	0.0664	0.1115	0.5515	-0.3232	0.1547	0.0367	0.0738	0.3372	0.8267	0.0953	0.4455
370	10	nose (II)	0.0004	0.0537	0.9937	0.0314	0.0635	0.6205	0.4558	0.7303	0.5325	0.0039	0.0548	0.9435	-0.0624	0.2245	0.7809	-0.0072	0.0899	0.9359	0.0546	0.124	0.6598	-0.116	0.0783	0.1384	-0.1458	0.0805	0.07	-0.2283	0.1113	0.0401	-0.1784	0.0883	0.0434	0.0436	0.0825	0.5973	-0.0775	0.0918	0.3983	-0.078	0.1205	0.5172	0.1888	0.284	0.5061	-0.026	0.3891
371	10	nose (II)	-0.0398	0.1038	0.7016	-0.1642	0.0995	0.0989	0.1215	0.785	0.877	-0.0198	0.0992	0.8421	-0.2978	0.3234	0.357	-0.0686	0.1417	0.6285	0.0014	0.2023	0.9946	-0.2162	0.1428	0.1301	-0.1089	0.1055	0.3017	-0.3114	0.1897	0.1006	-0.0038	0.1411	0.9787	-0.0332	0.1244	0.7895	0.4155	0.1549	0.0073	0.203	0.1826	0.2663	-0.1821	0.4258	0.669	0.5885	0.8074
372	10	nose (II)	-0.0614	0.0595	0.3021	0.0051	0.065	0.9375	0.6365	0.8884	0.4737	0.0174	0.0637	0.7853	-0.2254	0.2159	0.2967	0.0337	0.0938	0.7195	0.1784	0.1233	0.1479	-0.0247	0.0783	0.7521	-0.0322	0.087	0.7116	-0.1146	0.1211	0.3438	0.0779	0.1018	0.4442	0.0778	0.082	0.3427	-0.149	0.0915	0.1037	0.0801	0.1288	0.5339	0.2621	0.3185	0.4106	0.1283	0.4368
373	10	nose (II)	0.0834	0.0882	0.3439	-0.0893	0.1089	0.4122	0.5006	0.9774	0.6085	-0.0344	0.0853	0.6867	0.2481	0.3503	0.4788	0.0974	0.1503	0.5169	0.0702	0.1835	0.7021	0.1265	0.1302	0.3314	-0.0937	0.1355	0.4894	-0.0196	0.1747	0.9107	-0.089	0.1519	0.558	-0.1718	0.1396	0.2186	0.2508	0.1511	0.097	-0.2746	0.2088	0.1885	-0.3444	0.4311	0.4243	-0.2461	0.7671
374	10	nose (II)	-0.1418	0.0775	0.0674	0.1268	0.0887	0.1528	0.1016	0.7001	0.8846	-0.0815	0.0814	0.3165	0.0746	0.299	0.8029	0.0728	0.1377	0.5969	-0.0981	0.1626	0.5461	0.0997	0.1253	0.4265	0.0656	0.1076	0.542	0.1668	0.1549	0.2816	0.2191	0.141	0.1201	0.0046	0.1098	0.9666	-0.0768	0.1305	0.5564	0.1142	0.1685	0.4979	0.1966	0.4054	0.6278	0.0782	0.5737
375	10	nose (II)	-0.0808	0.058	0.1637	-0.0071	0.0932	0.9395	-0.6374	1.022	0.5328	-0.119	0.0619	0.0545	0.1015	0.2827	0.7197	-0.0504	0.1075	0.6393	-0.1751	0.1437	0.223	-0.1603	0.1006	0.1111	0.0582	0.0968	0.5481	0.0926	0.1263	0.4633	0.1233	0.1239	0.3198	-0.0021	0.0979	0.9825	0.1352	0.1079	0.2105	-0.0164	0.1425	0.9083	0.2924	0.3879	0.4509	-0.0363	0.5169
376	10	nose (II)	-0.0485	0.1019	0.6341	-0.132	0.0764	0.0842	0.1189	0.6904	0.8632	0.0333	0.0991	0.7369	-0.3182	0.2791	0.2542	0.014	0.1248	0.9109	0.0124	0.1558	0.9363	-0.0571	0.122	0.6399	-0.0015	0.0914	0.9866	-0.0057	0.1831	0.9753	-0.0126	0.1129	0.911	0.1023	0.1032	0.3214	-0.148	0.109	0.1745	0.1423	0.1515	0.3474	0.0171	0.3492	0.9609	0.7826	0.7502
377	10	nose (II)	-0.0379	0.0572	0.508	-0.0207	0.0729	0.7767	0.0631	0.5601	0.9103	0.0663	0.0608	0.2755	-0.0664	0.2398	0.7818	-0.1173	0.1074	0.275	0.004	0.1383	0.9768	0.1003	0.0956	0.2943	0.0233	0.0891	0.794	0.1008	0.1101	0.3602	0.1164	0.1103	0.2916	0.1608	0.0976	0.0995	-0.2359	0.1053	0.0251	0.3986	0.1375	0.0037	0.1847	0.3256	0.5707	-0.2252	0.5198
378	11	nose (II)	-0.0543	0.0683	0.4268	-0.0244	0.0656	0.7094	-0.3944	0.6647	0.5529	-0.0827	0.0663	0.2121	-0.0683	0.2046	0.7386	0.1479	0.1028	0.1502	-0.2063	0.1235	0.0948	0.0644	0.0994	0.5172	-0.0077	0.0833	0.9263	0.065	0.1345	0.6289	-0.0676	0.099	0.4947	-0.0713	0.0946	0.451	-0.0576	0.0927	0.5343	-0.2741	0.1234	0.0264	0.4348	0.3447	0.2071	-0.0199	0.4419
379	11	nose (II)	-0.0416	0.065	0.5227	-0.1706	0.0804	0.0339	-0.1734	0.6949	0.8029	-0.0738	0.0666	0.2679	0.1198	0.2623	0.6478	0.0784	0.1002	0.434	-0.1683	0.1462	0.2495	-0.1381	0.0906	0.1275	0.0826	0.0987	0.4025	-0.0949	0.122	0.4364	-0.1796	0.1095	0.1008	-0.079	0.0983	0.4218	-0.0183	0.1065	0.8635	-0.163	0.1268	0.1986	0.1628	0.332	0.6239	0.1579	0.4863
380	11	nose (II)	-0.0012	0.0857	0.9887	0.028	0.1071	0.7936	-0.1043	0.8736	0.9049	-0.0947	0.096	0.3239	0.3044	0.3893	0.4343	-0.1323	0.1659	0.4253	-0.0426	0.2242	0.8491	0.007	0.1468	0.962	-0.0764	0.1593	0.6315	0.1016	0.2007	0.6126	0.0187	0.1657	0.9102	0.1027	0.164	0.531	0.2827	0.1643	0.0854	-0.0121	0.2321	0.9586	0.3944	0.5568	0.4788	-0.0185	0.702
381	11	nose (II)	-0.0649	0.079	0.4113	-0.1043	0.1229	0.3961	0.3595	0.9206	0.6961	-0.1257	0.091	0.1673	-0.1892	0.3784	0.6171	0.2597	0.1887	0.1688	0.1423	0.2343	0.5436	0.2419	0.1624	0.1363	0.0369	0.1575	0.8149	0.2021	0.2022	0.3174	0.1282	0.1763	0.4674	0.1911	0.17	0.2611	0.087	0.1619	0.5908	0.2289	0.2377	0.3354	0.0534	0.4886	0.913	-0.5392	1.01
382	11	nose (II)	-0.1454	0.099	0.142	0.0659	0.1098	0.5483	0.2187	0.876	0.8029	-0.0215	0.0913	0.8138	0.1874	0.3703	0.6129	-0.0371	0.1771	0.8342	-0.058	0.2225	0.7943	0.076	0.1465	0.604	-0.2145	0.1433	0.1344	-0.046	0.1938	0.8124	-0.0373	0.1523	0.8063	-0.0017	0.1473	0.9908	0.2534	0.1698	0.1355	0.0617	0.2224	0.7816	0.1261	0.4547	0.7815	0.1588	0.7688
383	11	nose (II)	-0.0217	0.0772	0.7783	0.063	0.1034	0.5425	0.0014	0.8455	0.9987	0.0654	0.0876	0.4551	0.0474	0.4105	0.9082	0.0537	0.1461	0.7131	0.1777	0.2024	0.38	0.1191	0.1485	0.4226	0.1264	0.1339	0.3451	0.169	0.1686	0.316	0.1605	0.1494	0.2825	0.0081	0.1461	0.9556	0.1875	0.1688	0.2667	0.0281	0.1856	0.8798	0.0402	0.4508	0.929	-0.332	0.7537
384	11	nose (II)	0.0254	0.0602	0.6732	-0.0535	0.0788	0.4969	0.7228	1.053	0.4925	-0.0531	0.0641	0.4079	-0.0245	0.285	0.9315	0.0808	0.1137	0.4771	-0.1463	0.1628	0.3689	-0.0072	0.1072	0.9462	0.0409	0.1002	0.6829	-0.079	0.1316	0.5483	-0.2217	0.134	0.0982	-0.023	0.1119	0.8367	0.1321	0.1358	0.3308	-0.0312	0.1498	0.8349	0.2121	0.3387	0.5312	-0.8218	0.852
385	11	nose (II)	-0.0806	0.0719	0.262	0.0497	0.0928	0.5924	0.3092	0.7325	0.6729	-0.0326	0.073	0.6548	0.1497	0.3262	0.6463	0.1198	0.1273	0.3467	-0.1347	0.1898	0.4781	-0.087	0.1139	0.4448	0.1032	0.1128	0.3606	0.1485	0.1461	0.3094	-0.0122	0.1264	0.9233	0.0539	0.1296	0.6776	0.0171	0.1332	0.8979	-0.1696	0.1648	0.3035	0.6394	0.4528	0.1579	0.6519	0.7625
386	11	nose (II)	-0.0606	0.0701	0.3873	-0.0179	0.0848	0.833	-0.7908	1.1476	0.4907	0.0661	0.0798	0.4075	0.3683	0.3398	0.2784	-0.1023	0.1458	0.483	0.0657	0.1822	0.7186	0.0555	0.125	0.6571	-0.1161	0.1355	0.3916	0.0676	0.1659	0.6838	0.0963	0.1413	0.4954	-0.1189	0.1382	0.3896	0.1078	0.1436	0.4527	-0.0484	0.1824	0.7909	0.4122	0.4735	0.384	0.2804	0.5654
387	11	nose (II)	0.1335	0.0648	0.0394	-0.0046	0.0749	0.9514	0.0697	0.502	0.8895	0.1105	0.0697	0.1128	-0.0239	0.2109	0.9097	-0.0762	0.1103	0.4895	0.0599	0.1433	0.676	0.1296	0.1035	0.2108	-0.0197	0.0886	0.8243	0.0447	0.1499	0.7654	0.1216	0.0961	0.2056	0.0034	0.0972	0.9723	-0.0399	0.1064	0.7077	0.1165	0.1329	0.3805	0.024	0.2906	0.9343	-0.2099	0.4955
388	11	nose (II)	0.0105	0.0575	0.8556	-0.0427	0.0817	0.6012	0.7534	1.0502	0.4731	-0.035	0.0565	0.5359	0.2917	0.2564	0.2554	0.1333	0.1116	0.2322	-0.0104	0.1358	0.939	-0.0842	0.1022	0.4104	0.0171	0.0848	0.8403	-0.0461	0.1234	0.7086	-0.065	0.0988	0.5107	0.0614	0.0955	0.5205	0.0784	0.1121	0.4842	-0.1986	0.1348	0.1406	0.2923	0.3434	0.3947	-0.0377	0.4882
389	11	nose (II)	-0.2109	0.0808	0.009	0.0296	0.0957	0.7574	-0.3868	0.8905	0.6641	-0.0866	0.0826	0.2943	-0.1757	0.3309	0.5955	0.1961	0.1442	0.1739	0.0644	0.1897	0.7344	0.0166	0.13	0.8981	0.1168	0.1169	0.3179	0.0974	0.1641	0.5527	-0.0436	0.1368	0.7499	0.1147	0.1205	0.3413	0.1552	0.1394	0.2656	-0.1445	0.1647	0.3804	0.1496	0.3801	0.6939	0.3276	0.6423
390	11	nose (II)	-0.07	0.0824	0.3954	0.0735	0.0785	0.3488	0.1226	0.5831	0.8335	-0.0903	0.0798	0.2574	0.2328	0.2408	0.3336	-0.1109	0.0995	0.2653	-0.143	0.1334	0.2839	-0.1089	0.1205	0.3658	0.0346	0.0975	0.7229	-0.0464	0.1566	0.7672	-0.121	0.1056	0.2519	0.0294	0.1055	0.7806	0.2231	0.1225	0.0686	-0.0798	0.1357	0.5565	0.4841	0.3771	0.1993	-0.2244	0.4954
391	11	nose (II)	-0.0645	0.1052	0.54	0.1054	0.1512	0.4858	-0.7139	1.4016	0.6105	0.0631	0.1225	0.6066	-0.7734	0.6244	0.2155	-0.0575	0.1854	0.7564	-0.2098	0.2708	0.4385	0.1066	0.1755	0.5437	0.0321	0.1497	0.8302	0.0876	0.2115	0.6787	0.1076	0.1863	0.5638	-0.1378	0.2101	0.5119	0.0618	0.1952	0.7516	-0.4601	0.3506	0.1894	-0.4468	0.6203	0.4713	-0.1267	0.9152
392	11	nose (II)	0.0398	0.0828	0.6309	0.1288	0.1119	0.2498	-0.3634	0.9089	0.6893	0.1074	0.088	0.2222	-0.3137	0.3688	0.395	-0.1317	0.1508	0.3825	-0.2348	0.1915	0.2201	0.0083	0.1379	0.9518	-0.0498	0.1142	0.6625	-0.0244	0.1419	0.8635	0.0218	0.1337	0.8706	-0.1277	0.1361	0.3481	-0.1058	0.1543	0.4931	-0.3768	0.1988	0.058	-0.5769	0.4809	0.2302	0.1287	0.6987
393	11	nose (II)	0.0507	0.0821	0.537	0.1696	0.1062	0.1102	-0.4969	0.9585	0.6042	0.1026	0.0769	0.1821	-0.1017	0.3298	0.7579	-0.1286	0.1517	0.3964	-0.1332	0.187	0.4763	-0.0139	0.118	0.9059	-0.0667	0.1126	0.5536	-0.0451	0.1424	0.7515	0.1491	0.131	0.2552	-0.1015	0.1311	0.4388	-0.1293	0.1555	0.4057	-0.3339	0.1831	0.0683	-0.5099	0.4196	0.2243	0.4615	0.745
394	11	nose (II)	-9.7785e-05	0.0619	0.9987	0.0193	0.0775	0.8036	-0.6074	0.906	0.5026	0.0478	0.066	0.4687	-0.0773	0.2269	0.7333	0.1282	0.0996	0.1982	0.2306	0.1483	0.1199	0.1231	0.098	0.2089	0.0904	0.0988	0.36	0.183	0.1081	0.0905	0.1613	0.1125	0.1515	-0.0068	0.1033	0.9471	-0.0398	0.1137	0.7264	0.0353	0.1426	0.8045	0.0356	0.2967	0.9044	0.3644	0.5383
395	11	nose (II)	-0.0001	0.0615	0.9983	-0.0479	0.0745	0.5206	0.1655	0.5918	0.7798	-0.043	0.062	0.4878	-0.0112	0.2206	0.9594	0.2134	0.0944	0.0239	0.0686	0.1299	0.5975	0.0649	0.0912	0.4768	0.1077	0.081	0.1838	0.0194	0.1166	0.868	0.0286	0.0948	0.7629	-0.038	0.0847	0.6539	-0.0518	0.0885	0.5586	-0.0706	0.1288	0.5837	0.1685	0.2905	0.5619	-0.3687	0.505
396	11	nose (II)	0.0661	0.0746	0.3757	0.1018	0.0922	0.2695	-0.0224	0.6686	0.9733	0.0133	0.0735	0.8561	-0.2381	0.3475	0.4932	-0.0361	0.1246	0.7721	0.1142	0.1613	0.4792	-0.0022	0.1147	0.9849	-0.0442	0.1132	0.696	-0.06	0.1341	0.6547	0.0551	0.1295	0.6702	0.0979	0.1314	0.4562	-0.2578	0.1464	0.0783	0.1767	0.1782	0.3213	-0.613	0.4558	0.1787	0.0866	0.5954
397	11	nose (II)	-0.1218	0.0774	0.1153	0.0539	0.0931	0.5625	-0.1499	0.7204	0.8352	-0.0972	0.0769	0.2062	0.4577	0.3047	0.133	-0.1812	0.1262	0.1508	-0.1319	0.1729	0.4455	0.0184	0.119	0.877	-0.2085	0.1095	0.057	-0.0388	0.1223	0.751	-0.0873	0.1292	0.4991	0.0016	0.1046	0.9878	0.2396	0.1189	0.0438	0.0134	0.1554	0.9314	0.5841	0.4874	0.2308	-0.0202	0.5382
398	11	nose (II)	-0.0187	0.065	0.774	-0.0043	0.0711	0.9515	-0.5307	0.8374	0.5262	0.0405	0.065	0.5326	-0.1929	0.2337	0.4091	0.0457	0.1025	0.6556	0.1489	0.1356	0.272	-0.1243	0.0954	0.1925	0.2307	0.0955	0.0157	0.1459	0.1306	0.2639	0.0773	0.1004	0.4418	0.0314	0.0888	0.7239	0.0123	0.1084	0.9096	0.0817	0.1377	0.553	-0.1738	0.3236	0.5912	0.6451	0.6346
399	11	nose (II)	-0.0935	0.073	0.2005	0.0129	0.0677	0.8491	-0.001	0.4781	0.9983	-0.1733	0.0661	0.0087	-0.2151	0.2138	0.3144	0.1919	0.1151	0.0953	-0.0664	0.124	0.5924	0.0387	0.107	0.7176	-0.0225	0.0809	0.7804	-0.0099	0.1637	0.9519	0.0107	0.0981	0.9131	0.0164	0.0955	0.8633	-0.1697	0.0894	0.0575	-0.1915	0.1241	0.123	0.09	0.3058	0.7686	-0.5156	0.6507
400	11	nose (II)	-0.0853	0.0783	0.2765	0.0345	0.0939	0.713	-0.4289	0.7738	0.5794	0.0253	0.0831	0.7609	-0.382	0.3444	0.2674	0.1054	0.1217	0.3863	0.2769	0.1656	0.0944	0.035	0.1279	0.7843	0.1169	0.1132	0.3014	0.2113	0.1573	0.1792	0.2158	0.1366	0.1144	0.2196	0.1228	0.0738	0.3354	0.1301	0.01	0.2027	0.1628	0.2129	-0.0617	0.4053	0.8791	0.2049	0.5529
401	12	lower face (III)	-0.0296	0.0629	0.6381	-0.0286	0.0815	0.7256	0.2224	0.5881	0.7053	0.0542	0.0648	0.4034	0.2856	0.2393	0.2328	0.0223	0.1084	0.8372	-0.0681	0.1393	0.6251	-0.0528	0.0957	0.5809	-0.0367	0.0963	0.7032	-0.102	0.1139	0.3702	-0.1027	0.1102	0.3515	-0.1056	0.0943	0.2628	0.1331	0.1114	0.2324	0.0124	0.1201	0.918	-0.1297	0.3217	0.6868	0.5483	0.6439
402	12	lower face (III)	0.017	0.0583	0.7709	-0.0254	0.0782	0.7454	0.6126	0.8938	0.4931	0.032	0.0542	0.5543	-0.0312	0.2546	0.9024	-0.1764	0.1085	0.104	-0.2465	0.156	0.1141	0.0424	0.0982	0.6661	-0.1316	0.0863	0.1274	-0.0229	0.1039	0.8259	-0.0267	0.1116	0.8108	0.1033	0.0863	0.2315	0.0574	0.0967	0.5528	-0.1343	0.1207	0.2656	-0.0267	0.3515	0.9394	0.1862	0.4849
403	12	lower face (III)	-0.0867	0.0684	0.2048	-0.069	0.0708	0.3293	-0.5755	0.8699	0.5083	-0.0022	0.065	0.973	-0.1311	0.2106	0.5337	0.0204	0.0983	0.8353	0.1143	0.1366	0.4027	-0.0674	0.0971	0.4876	0.0618	0.084	0.4619	-0.0239	0.1242	0.8475	0.0847	0.0945	0.3701	-0.0134	0.0819	0.8698	0.1157	0.0969	0.2326	0.1652	0.1306	0.2059	-0.0222	0.2859	0.9382	0.183	0.4955
404	12	lower face (III)	0.0915	0.0529	0.0834	0.1307	0.0714	0.0671	0.3219	0.6618	0.6267	-0.0415	0.0535	0.4383	-0.2714	0.2403	0.2588	-0.0363	0.0951	0.703	-0.0121	0.1353	0.929	0.0323	0.0872	0.7107	-0.2127	0.0901	0.0183	-0.2154	0.1091	0.0482	-0.1354	0.1064	0.2031	-0.021	0.0934	0.8218	-0.0112	0.097	0.9084	-0.1645	0.1291	0.2026	-0.2777	0.3136	0.3759	-0.3874	0.586
405	12	lower face (III)	-0.0266	0.0712	0.7092	0.2361	0.1032	0.0221	-1.2547	1.6571	0.4489	-0.0965	0.0681	0.1569	-0.4133	0.3055	0.176	-0.026	0.139	0.8515	-0.1871	0.158	0.2363	-0.0359	0.1105	0.7452	-0.1631	0.1194	0.1718	-0.1117	0.1614	0.4887	0.0021	0.1215	0.9863	0.0419	0.1079	0.6977	-0.0599	0.1155	0.6042	-0.2753	0.1713	0.1081	-0.5871	0.4808	0.222	-0.6053	0.7321
406	12	lower face (III)	-0.0313	0.0569	0.5814	0.1383	0.0746	0.0639	-0.5038	0.814	0.5359	0.0335	0.0594	0.5723	0.0048	0.2476	0.9844	-0.1837	0.1126	0.1028	-0.1905	0.1577	0.2269	0.1243	0.0938	0.185	-0.1706	0.1074	0.1123	-0.0047	0.13	0.9712	0.0222	0.1096	0.8398	-0.0853	0.1115	0.4441	-0.0257	0.1059	0.8081	-0.1588	0.1418	0.2628	-0.4075	0.368	0.2682	-0.5508	0.6344
407	12	lower face (III)	-0.046	0.0474	0.3316	0.0386	0.0588	0.5109	0.1932	0.4948	0.6961	-0.0392	0.05	0.4331	0.012	0.1987	0.9518	-0.0362	0.0863	0.6748	0.097	0.1133	0.3917	0.0604	0.081	0.4556	0.0626	0.0756	0.4074	-0.0104	0.0901	0.9083	0.1295	0.0875	0.1389	-0.0116	0.0771	0.8799	0.0961	0.0951	0.3122	-0.0186	0.1074	0.8626	-0.0996	0.2533	0.694	-0.2481	0.4141
408	12	lower face (III)	-0.0968	0.0696	0.1643	0.062	0.0735	0.3989	-0.1306	0.5494	0.8121	-0.0393	0.0724	0.5873	0.1038	0.2161	0.6309	-0.1241	0.1089	0.2546	-0.0792	0.1401	0.572	0.0152	0.0936	0.8708	0.0549	0.0836	0.5112	0.0953	0.1336	0.4759	0.104	0.104	0.317	-0.043	0.0877	0.6239	0.1301	0.0954	0.1725	-0.0109	0.1359	0.9362	-0.2869	0.3334	0.3895	-0.05	0.4187
409	12	lower face (III)	0.0014	0.0682	0.9831	-0.0774	0.0881	0.3801	-0.5775	0.9554	0.5455	0.074	0.0721	0.3046	0.0028	0.2944	0.9925	0.0865	0.1289	0.5022	-0.0341	0.1654	0.8364	-0.0566	0.1179	0.6309	0.0226	0.0978	0.8175	-0.0356	0.1428	0.8033	0.0642	0.1352	0.6347	0.1509	0.1194	0.206	-0.1332	0.1343	0.321	-0.0116	0.1595	0.942	-0.0304	0.3619	0.9331	-0.2551	0.6279
410	12	lower face (III)	0.1637	0.0617	0.008	0.0986	0.0803	0.2194	0.1908	0.6783	0.7785	0.0739	0.0596	0.2151	0.0277	0.2623	0.9158	0.0967	0.1152	0.4011	-0.0867	0.1512	0.5667	0.0381	0.094	0.685	-0.0349	0.0878	0.6911	0.0554	0.1108	0.6169	-0.141	0.1185	0.2341	0.201	0.0936	0.0318	0.0925	0.116	0.4252	-0.0059	0.1355	0.965	-0.1863	0.3343	0.5773	0.0172	0.4923
411	12	lower face (III)	0.1156	0.0564	0.0404	-0.0537	0.0737	0.4663	0.3794	0.6835	0.5788	0.0396	0.0569	0.4861	0.0973	0.2339	0.6776	0.1176	0.109	0.2805	0.2349	0.1465	0.1089	0.0308	0.0909	0.7345	0.1089	0.0871	0.2112	0.0077	0.1098	0.9442	-0.068	0.0975	0.4856	0.08	0.0899	0.3733	-0.1288	0.1008	0.2011	0.0067	0.1164	0.954	-0.1636	0.3203	0.6096	0.1057	0.482
412	12	lower face (III)	0.0861	0.0697	0.2171	-0.0511	0.091	0.5746	0.0525	0.6354	0.9342	0.0401	0.0718	0.5762	-0.0214	0.2974	0.9428	-0.0306	0.1252	0.8071	0.3171	0.1836	0.0841	0.0771	0.1118	0.4902	0.1542	0.1079	0.1528	0.0369	0.1422	0.7954	0.0208	0.1207	0.8634	-0.0205	0.1033	0.8425	-0.1515	0.1198	0.2061	0.1492	0.1653	0.3667	-0.2841	0.4153	0.494	-0.0716	0.5305
413	12	lower face (III)	-0.0576	0.0573	0.3147	0.0677	0.076	0.3729	0.7296	1.0887	0.5028	-0.0794	0.0611	0.1938	-0.1774	0.3007	0.5552	0.2485	0.1356	0.0668	0.245	0.1713	0.1527	0.0037	0.104	0.9717	0.0564	0.0969	0.5607	-0.0904	0.1177	0.4424	0.0977	0.1072	0.3621	0.1556	0.1043	0.1357	-0.1688	0.1178	0.1518	-0.0558	0.1445	0.6995	0.0092	0.3301	0.9779	-0.0182	0.4741
414	12	lower face (III)	-0.0813	0.081	0.3152	-0.1329	0.1164	0.2538	-0.2298	0.85	0.7869	-0.0489	0.0766	0.523	0.1088	0.334	0.7446	0.2495	0.1653	0.1312	0.1633	0.1968	0.4067	0.1663	0.1315	0.2061	0.1318	0.1368	0.3353	0.0505	0.1557	0.7457	0.222	0.1623	0.1714	0.1563	0.1382	0.2581	-0.1666	0.1554	0.2835	-0.2448	0.1882	0.1933	0.3415	0.4664	0.464	0.4619	0.7494
415	12	lower face (III)	0.0588	0.0501	0.2406	0.043	0.0755	0.5683	-0.3439	0.713	0.6296	0.1024	0.0569	0.0716	0.1905	0.2598	0.4634	0.0277	0.1075	0.7968	-0.196	0.1372	0.1533	-0.0652	0.0886	0.4616	0.031	0.0902	0.7309	-0.0489	0.1182	0.6787	-0.0487	0.1057	0.6453	-0.0039	0.0841	0.963	0.1854	0.1013	0.067	0.0921	0.1198	0.4417	-0.0076	0.2961	0.9796	-0.1264	0.3946
416	12	lower face (III)	-0.0408	0.074	0.5816	0.107	0.0802	0.1823	-0.4463	0.8109	0.5821	-0.0899	0.0767	0.2411	0.0792	0.2649	0.7649	-0.168	0.1222	0.1689	0.0273	0.1649	0.8686	0.1175	0.1034	0.256	0.0692	0.0876	0.4295	0.1181	0.1479	0.4247	0.0711	0.1066	0.5045	0.1258	0.1142	0.2703	0.1495	0.1214	0.2181	-0.0475	0.1486	0.7493	-0.7429	0.4615	0.1074	-0.2947	0.5568
417	12	lower face (III)	-0.0089	0.0533	0.868	0.0369	0.0742	0.6195	-0.3463	0.7169	0.6291	0.0526	0.0559	0.3468	0.1403	0.2269	0.5363	0.1069	0.0992	0.2812	-0.0269	0.1442	0.8519	-0.0694	0.0912	0.4465	0.0302	0.0899	0.7367	0.0082	0.1177	0.9442	-0.026	0.0939	0.782	0.0443	0.0881	0.6149	-0.123	0.11	0.2632	-0.1342	0.1403	0.3389	0.448	0.3736	0.2305	-0.027	0.4704
418	12	lower face (III)	0.0381	0.0496	0.4419	-0.1792	0.0644	0.0054	0.88	1.1041	0.4254	0.0147	0.0541	0.786	0.0527	0.2119	0.8036	0.0383	0.0995	0.7002	0.1876	0.1265	0.1382	-0.0955	0.0792	0.2281	-0.09	0.0722	0.2122	-0.1575	0.1051	0.1341	-0.1431	0.084	0.0886	-0.0616	0.0828	0.457	-0.0802	0.088	0.3621	0.1784	0.1118	0.1107	0.1534	0.237	0.5175	0.5773	0.5601
419	12	lower face (III)	0.0472	0.0525	0.3682	-0.0041	0.0718	0.9543	0.2573	0.6467	0.6907	0.0212	0.0535	0.6915	0.1736	0.2295	0.4495	-0.1896	0.1035	0.067	-0.1237	0.1279	0.3335	-0.0835	0.0873	0.3389	-0.1741	0.0921	0.0587	-0.0743	0.094	0.4291	-0.1972	0.1074	0.0664	-0.2377	0.0974	0.0147	0.0908	0.1028	0.3773	0.1232	0.134	0.3579	-0.2589	0.3146	0.4106	-0.0927	0.4685
420	12	lower face (III)	-0.1042	0.0634	0.1	0.012	0.078	0.8778	-0.976	1.2888	0.4488	-0.1008	0.0607	0.0968	-0.0055	0.2691	0.9838	-0.0251	0.1113	0.8217	-0.1152	0.1415	0.4157	-0.088	0.1017	0.3868	0.1329	0.0992	0.1804	0.0418	0.1271	0.7421	0.1019	0.1052	0.3326	0.1434	0.0975	0.1413	0.0795	0.1119	0.4774	-0.167	0.1481	0.2595	0.2152	0.3599	0.5499	-0.0395	0.4876
421	12	lower face (III)	-0.1049	0.0782	0.1798	-0.2005	0.1207	0.0968	0.9076	1.2991	0.4848	-0.0794	0.076	0.2963	-0.0574	0.3408	0.8664	0.0879	0.1431	0.5389	0.2372	0.1902	0.2125	-0.037	0.1329	0.7808	0.1427	0.1127	0.2056	-0.018	0.1463	0.9022	0.0623	0.1436	0.6643	0.0185	0.1125	0.8693	0.1462	0.1466	0.3187	0.3142	0.1822	0.0846	-0.0336	0.4419	0.9393	0.4216	0.7086
422	12	lower face (III)	0.0601	0.0533	0.2592	0.1019	0.0652	0.118	-0.0711	0.483	0.8829	0.0799	0.0515	0.1207	-0.1078	0.2015	0.5925	0.0038	0.0945	0.9678	0.2419	0.1181	0.0405	0.1123	0.0852	0.1875	-0.0141	0.0765	0.8535	-0.0302	0.1038	0.7712	-0.0218	0.0848	0.7973	-0.0503	0.079	0.5242	0.0531	0.0865	0.5397	0.1433	0.1165	0.2185	0.0962	0.2658	0.7175	-0.1814	0.4624
423	12	lower face (III)	-0.0083	0.0674	0.9017	0.1476	0.0851	0.0829	-1.529	1.9121	0.4239	0.0255	0.0646	0.6937	-0.1876	0.288	0.5149	-0.0012	0.1203	0.992	0.2779	0.1743	0.1109	0.1063	0.1024	0.299	0.0289	0.0973	0.7666	0.0852	0.1296	0.5109	0.1145	0.1265	0.3651	-0.2299	0.1143	0.0443	0.0455	0.1223	0.7097	0.2375	0.1477	0.1078	-0.2364	0.3884	0.5428	-0.0972	0.567
424	12	lower face (III)	0.0534	0.0641	0.4051	-0.186	0.0901	0.039	0.6745	0.9498	0.4776	0.0157	0.0628	0.8022	0.0728	0.2646	0.7833	0.0697	0.1113	0.5311	-0.0931	0.1476	0.5282	0.0448	0.0915	0.6243	0.014	0.0975	0.8855	0.0235	0.1265	0.8525	-0.0435	0.1158	0.7071	0.2579	0.112	0.0212	-0.0731	0.1232	0.553	-0.1819	0.1349	0.1774	0.3527	0.3681	0.3379	0.1956	0.5165
425	12	lower face (III)	0.008	0.0923	0.9311	-0.119	0.1325	0.3691	0.0818	0.8415	0.9225	0.011	0.0873	0.9002	0.1434	0.4082	0.7254	-0.0682	0.1701	0.6884	-0.0193	0.2596	0.9407	0.0959	0.1591	0.5469	0.0051	0.1241	0.9672	0.2598	0.2062	0.2076	0.1137	0.1767	0.5201	0.2327	0.1571	0.1384	0.2381	0.2104	0.2577	-0.0136	0.1961	0.9446	-0.8514	0.6625	0.1987	0.1331	0.7017
426	13	lower face (III)	-0.0508	0.08	0.5256	0.026	0.0866	0.7643	-0.1188	0.6816	0.8616	-0.053	0.0741	0.4743	0.0005	0.3093	0.9988	0.0621	0.1297	0.6321	-0.2545	0.1813	0.1604	-0.0363	0.1064	0.7333	-0.1089	0.1211	0.3688	0.0141	0.1505	0.9255	0.0462	0.133	0.7285	-0.1437	0.1192	0.228	0.0562	0.1289	0.6629	0.1576	0.1544	0.3076	-0.3904	0.4502	0.3858	0.2318	0.617
427	13	lower face (III)	-0.0661	0.0666	0.3213	0.2193	0.0833	0.0085	-1.0443	1.3271	0.4313	-0.0095	0.0763	0.9007	0.0421	0.2441	0.8632	-0.0576	0.1077	0.5926	-0.0393	0.1437	0.7847	0.1114	0.1078	0.3013	0.0244	0.0878	0.781	0.0362	0.1333	0.786	-0.0127	0.1159	0.9126	0.0531	0.1051	0.6135	0.0809	0.1083	0.4552	-0.0874	0.1506	0.5616	-0.3767	0.3772	0.318	-0.115	0.4804
428	13	lower face (III)	0.0198	0.0778	0.799	0.2166	0.1174	0.0651	0.0508	0.7532	0.9462	0.0523	0.0788	0.5068	0.3218	0.3582	0.3689	0.024	0.153	0.8753	0.0143	0.2002	0.9431	0.1946	0.1407	0.1666	-0.0353	0.1265	0.78	-0.2257	0.1643	0.1696	-0.1511	0.1583	0.3397	-0.0166	0.127	0.8958	0.1007	0.1348	0.4551	0.0259	0.1827	0.8871	-0.2667	0.4594	0.5615	1.0643	1.1432
429	13	lower face (III)	0.0042	0.07	0.9517	-0.0094	0.0795	0.9056	-0.186	0.6437	0.7726	-0.044	0.0736	0.5502	-0.0194	0.271	0.9429	0.0561	0.1169	0.6311	-0.0297	0.1373	0.8287	0.095	0.1043	0.3624	-0.0194	0.0954	0.8389	0.1437	0.1336	0.282	0.2781	0.1094	0.011	-0.0568	0.0963	0.5554	0.1568	0.1193	0.1886	-0.1366	0.1409	0.3324	-0.3013	0.3329	0.3654	-1.2213	1.1117
430	13	lower face (III)	-0.0598	0.0489	0.222	0.0613	0.0753	0.415	0.5042	0.8736	0.5639	-0.0952	0.0571	0.0955	-0.0325	0.2138	0.8793	0.0958	0.1053	0.3625	0.1367	0.1291	0.2897	-0.0264	0.0876	0.7634	0.0416	0.0898	0.643	0.1032	0.1112	0.3532	0.1018	0.0968	0.2933	0.1601	0.096	0.0955	-0.0317	0.1081	0.7694	-0.204	0.1224	0.0956	0.5463	0.3753	0.1455	-0.1681	0.4487
431	13	lower face (III)	0.1358	0.0774	0.0793	-0.0945	0.0919	0.3039	-0.4209	0.8558	0.6228	0.0364	0.0727	0.6164	-0.1335	0.3189	0.6756	0.1048	0.1253	0.4032	-0.0985	0.1568	0.5298	0.176	0.1236	0.1544	-0.0327	0.1048	0.7548	0.115	0.1367	0.4003	0.2169	0.1333	0.1036	-0.2186	0.1138	0.0548	0.046	0.1257	0.7145	0.1114	0.1431	0.4362	0.2124	0.3592	0.5543	0.4557	0.6912
432	13	lower face (III)	0.1323	0.2358	0.5747	0.432	0.5629	0.4429	-0.0416	1.7676	0.9812	-0.1603	0.2623	0.5412	-0.7382	1.1983	0.5379	-0.0647	0.3311	0.845	-0.2888	0.5118	0.5726	-0.1388	0.3538	0.6949	-0.0164	0.2535	0.9485	-0.1633	0.3929	0.6776	-0.3066	0.5019	0.5413	0.203	0.3061	0.5071	0.1745	0.347	0.615	-1.0325	1.1452	0.3673	1.6276	2.3407	0.4868	-1.8772	2.9778
433	13	lower face (III)	0.0171	0.0668	0.7982	-0.1317	0.0947	0.1646	0.4122	0.8256	0.6176	0.0024	0.0706	0.9731	-0.1086	0.2959	0.7136	-0.0271	0.1305	0.8354	0.0245	0.1766	0.8897	-0.0444	0.1089	0.6832	0.0211	0.1027	0.837	0.0835	0.1351	0.5363	0.1132	0.139	0.4155	0.0572	0.1103	0.6039	0.2335	0.1386	0.092	0.1201	0.1608	0.4548	-0.3418	0.4252	0.4215	0.0705	0.5665
434	13	lower face (III)	0.0224	0.0571	0.6942	0.1066	0.0685	0.1196	0.4193	0.6723	0.5329	0.004	0.0577	0.9448	-0.2057	0.2636	0.4353	0.1261	0.0991	0.2036	0.0756	0.1242	0.5428	0.0237	0.0941	0.8009	-0.0008	0.089	0.9928	-0.0219	0.1044	0.834	-0.0987	0.1179	0.4028	0.0106	0.0741	0.8859	-0.1504	0.1005	0.1342	-0.1814	0.1313	0.167	0.2278	0.2992	0.4464	-0.1782	0.4809
435	13	lower face (III)	-0.0213	0.072	0.7667	-0.005	0.0862	0.9541	0.114	0.7194	0.8741	0.0803	0.0695	0.2475	0.5241	0.3227	0.1044	0.0751	0.1301	0.5637	-0.0304	0.1734	0.8607	-0.0973	0.1075	0.3655	0.1482	0.1097	0.1768	-0.0866	0.1476	0.5572	0.006	0.1229	0.9613	-0.0492	0.1087	0.6509	-0.0791	0.1205	0.5117	0.3418	0.1596	0.0323	0.2798	0.4245	0.5099	0.4135	0.6247
436	13	lower face (III)	0.0425	0.0802	0.5959	0.0589	0.0904	0.5145	-0.1767	0.7792	0.8206	-0.0688	0.0887	0.4381	-0.1168	0.2998	0.6969	0.0469	0.1116	0.6745	0.1335	0.1628	0.4123	0.1436	0.1081	0.184	-0.1225	0.1079	0.2562	-0.0382	0.1537	0.8038	-0.1828	0.1235	0.1389	-0.0801	0.1102	0.4674	-0.0505	0.1263	0.6892	-0.1898	0.1614	0.2396	-0.2374	0.3742	0.5258	0.1518	0.6139
437	13	lower face (III)	-0.0031	0.0562	0.9556	-0.0123	0.0728	0.8659	-0.5987	0.8673	0.49	-0.0017	0.0516	0.9737	-0.2043	0.2729	0.454	-0.1095	0.1054	0.2989	-0.1376	0.1392	0.3226	-0.0064	0.0853	0.9406	0.0886	0.0952	0.3518	0.0954	0.1019	0.3494	0.1157	0.1043	0.2671	0.0831	0.0891	0.3514	-0.0379	0.1079	0.7252	-0.0349	0.1322	0.792	0.0758	0.3219	0.8138	-0.0922	0.4513
438	13	lower face (III)	0.0488	0.0769	0.5254	-0.1664	0.1046	0.1115	1.1456	1.5902	0.4713	-0.0069	0.0795	0.9313	-0.3147	0.3249	0.3327	0.0437	0.1434	0.7607	0.0997	0.1753	0.5694	-0.0215	0.1207	0.8584	-0.0312	0.1129	0.7822	-0.0608	0.1523	0.6898	0.1162	0.1487	0.4344	-0.0012	0.1204	0.9921	-0.1007	0.1377	0.4645	0.0527	0.1777	0.7668	0.333	0.4247	0.433	0.421	0.7231
439	13	lower face (III)	-0.109	0.0994	0.2727	-0.1284	0.1372	0.3493	-0.2039	0.9087	0.8225	-0.0608	0.0918	0.5082	0.1555	0.3894	0.6897	0.042	0.1541	0.7853	-0.0085	0.2103	0.9678	-0.0666	0.1498	0.6566	0.0479	0.1492	0.7482	-0.274	0.19	0.1494	0.2052	0.1888	0.2772	0.0114	0.14	0.935	0.0798	0.1598	0.6174	-0.0527	0.2101	0.8019	0.0013	0.5468	0.998	0.6869	0.9962
440	13	lower face (III)	-0.0129	0.0595	0.8277	0.0109	0.0747	0.8844	0.4156	0.7229	0.5653	-0.0787	0.0636	0.2157	-0.073	0.2603	0.7791	0.0837	0.1131	0.4594	0.0056	0.1301	0.9656	0.1115	0.0949	0.2399	-0.0031	0.0777	0.9681	0.1481	0.1129	0.1895	0.086	0.097	0.3754	0.0255	0.0807	0.7514	0.1736	0.1061	0.102	-0.2358	0.1353	0.0813	-0.4602	0.4124	0.2644	0.1238	0.4609
441	13	lower face (III)	0.0163	0.0575	0.7762	-0.107	0.0689	0.1205	0.0607	0.4821	0.8998	0.0509	0.0615	0.4085	-0.1163	0.2212	0.599	-0.0866	0.0973	0.3737	-0.0379	0.1419	0.7894	0.0302	0.085	0.7221	-0.0577	0.0904	0.5235	-0.0842	0.1145	0.462	0.1459	0.1116	0.1912	0.0763	0.0893	0.3929	-0.0049	0.1028	0.962	-0.0543	0.1214	0.6548	-0.1632	0.3118	0.6007	-0.1465	0.446
442	14	upper face (IV)	-0.0251	0.1071	0.8146	0.122	0.1343	0.3639	0.4543	1.0491	0.665	0.0157	0.1054	0.8815	0.5603	0.4475	0.2106	0.0985	0.1932	0.6103	-0.0094	0.2285	0.9672	0.1319	0.1736	0.4472	0.1919	0.1509	0.2034	0.2464	0.2024	0.2233	0.1235	0.1829	0.4994	0.0215	0.1684	0.8983	0.3808	0.2072	0.066	0.2942	0.2083	0.1578	-0.3611	0.6173	0.5586	-1.5244	1.535
443	14	upper face (IV)	-0.0446	0.0808	0.5813	0.0441	0.0925	0.6331	0.1492	0.7042	0.8322	-0.016	0.0896	0.8581	0.4553	0.2836	0.1084	0.0799	0.1297	0.5381	0.0147	0.1641	0.9288	0.2286	0.1156	0.0479	0.1613	0.1125	0.1518	0.2849	0.15	0.0576	0.0017	0.1244	0.9894	0.0211	0.1195	0.8599	0.4622	0.1411	0.0011	0.1416	0.1492	0.3424	-0.3328	0.4161	0.4238	-0.876	0.9416
444	14	upper face (IV)	-0.02	0.0844	0.8124	-0.0606	0.1294	0.6394	-1.4516	1.8062	0.4216	-0.1099	0.0847	0.1944	-0.2696	0.3434	0.4324	-0.0192	0.1549	0.9011	0.2682	0.2212	0.2253	-0.0857	0.1417	0.5454	-0.1549	0.1355	0.2527	-0.1059	0.1745	0.5442	0.12	0.161	0.4562	-0.189	0.1466	0.1972	-0.1389	0.1664	0.4038	0.1182	0.1927	0.5397	0.021	0.4157	0.9596	0.2397	0.6988
445	14	upper face (IV)	-0.0038	0.0775	0.9613	0.2862	0.1216	0.0185	0.949	1.427	0.506	0.056	0.0834	0.5021	0.1289	0.3403	0.7048	0.0725	0.1397	0.604	-0.0556	0.1901	0.7701	0.1713	0.143	0.2308	-0.0705	0.1192	0.5542	-0.0265	0.1661	0.8732	0.1217	0.1461	0.4049	0.2081	0.1299	0.1091	-0.1111	0.1428	0.4366	-0.0897	0.162	0.58	0.1462	0.456	0.7485	-0.0993	0.649
446	14	upper face (IV)	0.0658	0.0871	0.4503	0.0363	0.0963	0.7063	1.3888	1.7378	0.4242	0.0845	0.0859	0.3255	-0.0173	0.3194	0.9569	0.0097	0.149	0.948	-0.2928	0.187	0.1174	-0.2404	0.1396	0.0852	-0.1026	0.1166	0.3786	-0.3572	0.1778	0.0446	-0.2749	0.1554	0.0769	0.0156	0.1305	0.9048	0.0741	0.1475	0.6153	-0.2091	0.2102	0.3198	0.4832	0.4503	0.2833	0.1656	0.6685
447	14	upper face (IV)	-0.0308	0.1086	0.7769	-0.0269	0.1417	0.8495	0.5598	1.1485	0.626	-0.0036	0.1133	0.9748	-0.5779	0.5406	0.2851	0.3744	0.2384	0.1163	0.0101	0.2886	0.972	-0.2032	0.208	0.3284	0.1445	0.1947	0.4581	-0.0131	0.2529	0.9587	0.2809	0.2605	0.2809	0.1728	0.1943	0.3738	0.0446	0.2186	0.8384	-0.3052	0.2928	0.2972	0.2096	0.5949	0.7246	0.637	1.0691
448	14	upper face (IV)	-0.0358	0.0746	0.6314	-0.1274	0.0962	0.1857	0.0189	0.6712	0.9776	-0.0985	0.0769	0.2003	-0.3377	0.3269	0.3016	0.0766	0.1501	0.6101	-0.0522	0.1869	0.78	-0.1406	0.1303	0.2806	0.066	0.1081	0.5416	0.109	0.1499	0.4672	0.0082	0.1353	0.9515	0.0209	0.1164	0.8573	0.0662	0.1298	0.6097	-0.0667	0.1752	0.7035	0.6301	0.4723	0.1821	0.503	0.6366
449	14	upper face (IV)	-0.08	0.0887	0.3671	0.0377	0.1148	0.7428	-0.2814	0.8465	0.7396	-0.0537	0.0914	0.5566	0.3093	0.3239	0.3396	-0.1551	0.17	0.3614	-0.035	0.1972	0.8591	0.0859	0.1442	0.5513	0.0996	0.1227	0.4172	0.1224	0.1754	0.4854	0.3282	0.1809	0.0696	0.0417	0.1254	0.7391	-0.1968	0.1531	0.1988	0.1405	0.1961	0.4736	-0.1384	0.4708	0.7687	-0.6063	0.84
450	14	upper face (IV)	-0.0552	0.0541	0.3078	-0.049	0.0665	0.4616	-0.2928	0.6237	0.6387	-0.0412	0.0516	0.4245	0.1815	0.2108	0.3891	-0.0361	0.0905	0.6904	0.039	0.1229	0.7508	-0.0701	0.0821	0.3931	0.1305	0.0766	0.0882	0.0278	0.0981	0.7769	0.1583	0.1049	0.1312	0.0057	0.0796	0.9434	-0.0297	0.0853	0.7275	0.1085	0.1154	0.3471	0.2616	0.2819	0.3534	-0.0704	0.4028
451	14	upper face (IV)	-0.0432	0.0595	0.468	0.0001	0.0749	0.9984	-0.0502	0.5645	0.9291	-0.0737	0.0563	0.1907	0.1557	0.2276	0.4938	-0.0034	0.0993	0.9729	0.0598	0.1314	0.6487	-0.0509	0.0823	0.5362	0.1462	0.0891	0.1007	0.0879	0.1092	0.4207	0.1619	0.1117	0.1472	0.0483	0.0903	0.5927	-0.1065	0.1002	0.2879	0.1631	0.1391	0.2409	0.4987	0.3821	0.1919	-0.0105	0.4361
452	14	upper face (IV)	-0.1017	0.0617	0.0993	-0.011	0.0812	0.8921	-0.1491	0.6099	0.8068	-0.0556	0.0598	0.3525	0.1304	0.2497	0.6016	0.0105	0.1148	0.9271	-0.0373	0.1533	0.8076	-0.0622	0.1	0.5339	0.0508	0.0915	0.579	-0.0643	0.1133	0.5702	0.1286	0.1239	0.2992	0.0238	0.0933	0.7985	-0.0409	0.1061	0.6999	0.0243	0.1287	0.8505	0.3207	0.3439	0.351	-0.048	0.5066
453	14	upper face (IV)	0.0056	0.0748	0.9398	0.0534	0.092	0.5617	-0.5192	0.816	0.5246	-0.0657	0.0811	0.4176	-0.286	0.2839	0.3139	0.1712	0.1485	0.2487	0.2937	0.1831	0.1087	0.0365	0.1061	0.7307	0.0639	0.1205	0.5961	0.1779	0.1592	0.2638	0.0305	0.1282	0.8119	0.0139	0.1223	0.9098	0.1857	0.1322	0.1601	0.0918	0.1607	0.5676	0.1703	0.344	0.6206	-0.1354	0.6247
454	14	upper face (IV)	0.1361	0.1112	0.221	-0.0624	0.1201	0.6033	-0.3793	0.9515	0.6902	0.0221	0.0986	0.8225	0.3584	0.4159	0.3889	-0.1437	0.1752	0.4122	0.1872	0.2465	0.4477	-0.003	0.1437	0.9836	0.2128	0.1606	0.1853	0.3284	0.2165	0.1293	0.0624	0.1746	0.7208	-0.0024	0.1427	0.9863	-0.2156	0.1831	0.2391	0.3062	0.2383	0.1987	-0.6257	0.6028	0.2993	-1.1276	1.2662
455	14	upper face (IV)	-0.1398	0.0841	0.0964	0.1247	0.1149	0.2779	0.26	0.8718	0.7656	-0.0603	0.0785	0.4427	-0.0694	0.3625	0.8481	0.2236	0.1576	0.1559	0.1554	0.206	0.4506	0.0713	0.1297	0.5827	0.0043	0.1278	0.973	0.0497	0.1671	0.7661	-0.1528	0.1505	0.31	0.0731	0.1352	0.5888	0.1425	0.1576	0.3661	-0.007	0.1817	0.9692	-1.3685	0.7822	0.0802	0.4301	0.709
456	14	upper face (IV)	-0.0988	0.0648	0.1275	0.0995	0.0766	0.1942	0.2711	0.6455	0.6745	-0.0763	0.0728	0.2946	-0.1265	0.2345	0.5894	0.0783	0.1123	0.486	-0.0075	0.1339	0.955	0.0184	0.0965	0.8486	-0.0613	0.0868	0.48	0.0337	0.1451	0.8161	0.1931	0.1148	0.0926	-0.0385	0.1002	0.701	-0.0803	0.0948	0.3966	0.1054	0.1519	0.488	-0.0873	0.3233	0.7872	0.096	0.4484
457	14	upper face (IV)	-0.0492	0.076	0.5174	-0.0233	0.1106	0.8328	1.2066	1.678	0.4721	-0.0452	0.079	0.567	-0.1515	0.3461	0.6616	0.2875	0.1564	0.066	-0.1159	0.2043	0.5705	-0.1653	0.1308	0.2066	0.0153	0.1122	0.8918	-0.0511	0.1644	0.7558	0.1726	0.1523	0.257	0.0746	0.1199	0.5339	0.0424	0.129	0.7426	0.0344	0.1723	0.842	-0.0427	0.4127	0.9176	0.208	0.6405
458	14	upper face (IV)	-0.0172	0.0842	0.8385	-0.2023	0.1143	0.0768	0.0956	0.8079	0.9059	-0.0426	0.0833	0.6088	-0.2499	0.3677	0.4967	0.0996	0.1619	0.5384	-0.1257	0.2214	0.5702	-0.0206	0.1313	0.8752	0.1991	0.1305	0.1272	0.2334	0.162	0.1496	0.1101	0.1545	0.4762	-0.1691	0.1475	0.2517	-0.072	0.1512	0.6341	-0.0628	0.1877	0.7381	-0.3474	0.482	0.4711	0.2026	0.6641
459	14	upper face (IV)	-0.0785	0.1535	0.6091	0.2304	0.2625	0.3802	1.4614	2.5091	0.5603	0.0668	0.1615	0.6791	-0.7588	0.9087	0.4037	0.1863	0.3774	0.6216	-0.0938	0.3828	0.8064	0.0411	0.2784	0.8827	-0.238	0.3516	0.4984	-0.1832	0.3424	0.5925	-0.135	0.3502	0.7	-0.0763	0.2861	0.7896	-0.4517	0.513	0.3786	-0.7044	0.6463	0.2758	-0.0326	0.8591	0.9697	0.1672	1.143
460	14	upper face (IV)	0.0039	0.0581	0.9459	-0.0925	0.0818	0.2584	0.3343	0.7328	0.6483	-0.0021	0.0576	0.9708	-0.1874	0.26	0.471	0.244	0.1187	0.0398	0.2423	0.1564	0.1213	-0.0471	0.0821	0.566	0.0977	0.0903	0.279	-0.1114	0.1129	0.3239	0.0864	0.112	0.4404	-0.0045	0.0897	0.9596	-0.2855	0.1025	0.0054	0.0461	0.1306	0.7237	0.402	0.373	0.2812	0.7423	0.8418
461	14	upper face (IV)	0.0597	0.069	0.3866	-0.1624	0.0894	0.0692	0.5791	0.8017	0.4701	0.0738	0.0697	0.2899	-0.0329	0.2609	0.8996	-0.1663	0.1225	0.1746	-0.1542	0.1536	0.3155	-0.0401	0.0999	0.688	-0.0012	0.0988	0.9901	0.0837	0.147	0.569	-0.1524	0.122	0.2115	-0.0344	0.1155	0.7661	0.1968	0.1142	0.0849	-0.1583	0.148	0.2849	-0.1455	0.348	0.6758	0.022	0.569
462	15	upper face (IV)	-0.0488	0.083	0.5566	-0.0762	0.0968	0.4312	-0.1593	0.7428	0.8302	-0.0478	0.0894	0.5933	0.1476	0.3583	0.6804	-0.0519	0.1389	0.7087	-0.0477	0.1835	0.7947	0.1467	0.1352	0.2778	-0.0434	0.1202	0.7184	0.0721	0.1505	0.6317	0.2054	0.1415	0.1467	0.1062	0.1424	0.4557	0.2833	0.1486	0.0565	0.0457	0.1756	0.7945	-0.5574	0.4999	0.2648	-0.771	0.87
463	15	upper face (IV)	-0.0361	0.0912	0.6923	-0.0799	0.1215	0.511	0.2508	0.9083	0.7825	-0.0241	0.0936	0.7967	-0.0605	0.4038	0.8809	0.131	0.1559	0.4006	0.1457	0.2173	0.5024	0.3003	0.1668	0.0718	0.0719	0.1364	0.598	0.3213	0.18	0.0742	0.1921	0.1771	0.278	0.2271	0.1549	0.1426	0.2473	0.1848	0.1809	0.0713	0.2007	0.7226	-0.8316	0.6004	0.166	-1.2325	1.2294
464	15	upper face (IV)	0.3803	0.2139	0.0754	-0.0744	0.1422	0.6006	-0.8334	1.4801	0.5734	0.2851	0.1759	0.1051	-0.7403	0.6686	0.2682	-0.1003	0.2328	0.6666	0.2782	0.3016	0.3563	-0.2054	0.2171	0.3442	-0.2426	0.2171	0.2638	-0.1705	0.2944	0.5625	-0.3114	0.278	0.2626	-0.1376	0.217	0.526	0.0724	0.216	0.7376	0.0441	0.284	0.8767	1.1219	0.9665	0.2458	1.0333	1.3113
465	15	upper face (IV)	-0.0828	0.0626	0.1858	0.0463	0.093	0.6181	-0.2623	0.6485	0.6859	-0.0433	0.0655	0.5085	0.0281	0.2784	0.9197	0.1628	0.1214	0.18	-0.1201	0.1633	0.4623	0.0792	0.1013	0.4345	0.0521	0.121	0.667	0.0384	0.1392	0.7825	0.0939	0.1103	0.3948	-0.0404	0.1009	0.6891	-0.25	0.1293	0.0532	-0.2034	0.1641	0.215	0.273	0.3759	0.4677	-0.6036	0.717
466	15	upper face (IV)	-0.1244	0.1148	0.2785	0.0193	0.1246	0.8772	-0.5957	1.2463	0.6327	-0.0902	0.1086	0.4061	0.7403	0.5066	0.1439	0.0278	0.1857	0.8812	0.1843	0.2246	0.4119	-0.1373	0.1746	0.4316	0.295	0.1716	0.0855	0.3647	0.2115	0.0847	0.0948	0.1775	0.5933	0.0125	0.1555	0.9357	0.0721	0.1662	0.6644	-0.2647	0.2224	0.2339	0.2984	0.5412	0.5814	1.1722	1.3616
467	15	upper face (IV)	-0.0732	0.0961	0.4459	0.2185	0.0918	0.0173	0.6649	0.9955	0.5042	-0.0664	0.099	0.5027	0.7606	0.4041	0.0598	0.0822	0.1409	0.5596	0.0998	0.1619	0.5378	0.213	0.1177	0.0702	0.071	0.0997	0.4764	0.249	0.1587	0.1167	0.1807	0.1177	0.1247	0.0737	0.124	0.5523	0.0507	0.1088	0.6414	-0.1861	0.1656	0.2613	-0.202	0.3316	0.5423	-0.4546	0.697
468	15	upper face (IV)	0.0282	0.0634	0.6562	-0.0365	0.0925	0.6932	-0.4029	0.7076	0.5691	-0.0131	0.0647	0.8401	-0.0613	0.3171	0.8466	-0.0172	0.1265	0.8917	0.1582	0.1702	0.3525	0.0849	0.1114	0.4462	0.1055	0.1051	0.3159	0.0385	0.1287	0.7645	-0.0614	0.1293	0.6346	-0.0471	0.0995	0.6361	0.1168	0.1286	0.3637	-0.0829	0.1614	0.6072	-0.1067	0.336	0.7507	0.9106	0.8859
469	15	upper face (IV)	-0.0694	0.0845	0.4117	0.0605	0.1225	0.6211	0.3972	0.7699	0.6059	-0.0258	0.0926	0.7802	1.109	0.4371	0.0112	0.0415	0.1444	0.7739	-0.0836	0.1856	0.6525	-0.0461	0.1328	0.7285	0.0531	0.1272	0.6765	0.2279	0.1834	0.214	0.0284	0.1419	0.8416	0.049	0.1244	0.6934	-0.0842	0.1292	0.5147	0.0006	0.1858	0.9972	-0.3134	0.4255	0.4614	-1.1041	1.0549
470	15	upper face (IV)	0.0757	0.0638	0.2357	0.1092	0.0802	0.1736	0.6442	0.8943	0.4713	0.013	0.0712	0.855	-0.5584	0.2969	0.06	0.1041	0.1234	0.3988	0.2295	0.1308	0.0794	0.1531	0.1092	0.1611	-0.0672	0.0943	0.4757	-0.0509	0.1348	0.7059	0.0787	0.1105	0.4761	-0.0103	0.0923	0.911	0.0546	0.1164	0.6389	0.3348	0.133	0.0118	0.5359	0.3824	0.1611	-0.143	0.5293
471	15	upper face (IV)	0.0959	0.0677	0.1564	0.077	0.0894	0.3887	0.5951	0.9175	0.5166	0.0866	0.0732	0.2368	0.5959	0.3222	0.0644	-0.07	0.1187	0.5556	-0.0206	0.1507	0.8912	-0.0005	0.1098	0.9961	-0.1901	0.1099	0.0837	-0.0553	0.1386	0.6899	0.0428	0.13	0.7423	-0.0997	0.1101	0.3652	-0.0267	0.1261	0.8322	0.0803	0.148	0.5875	0.1276	0.3664	0.7277	0.1836	0.5604
472	15	upper face (IV)	0.0774	0.0778	0.3199	0.0722	0.1006	0.473	-0.1448	0.6076	0.8117	0.0379	0.0771	0.6232	-0.0221	0.2942	0.9402	-0.1583	0.1151	0.1691	-0.0714	0.1626	0.6606	0.0912	0.1084	0.4002	-0.1629	0.1114	0.1435	0.038	0.1276	0.7657	-0.0158	0.1279	0.9014	0.0325	0.1125	0.7729	0.1924	0.1192	0.1066	0.2998	0.1576	0.0572	-0.1657	0.3415	0.6275	-0.5967	0.8339
473	15	upper face (IV)	-0.0182	0.0589	0.7573	-0.1429	0.0928	0.1237	-0.706	1.0265	0.4916	0.0269	0.057	0.6365	0.1848	0.2648	0.4852	-0.0684	0.1177	0.5611	-0.0093	0.1578	0.9529	-0.1138	0.0952	0.2322	0.0963	0.0979	0.325	0.0253	0.1254	0.8399	-0.0102	0.117	0.9303	0.156	0.094	0.0971	-0.0675	0.1271	0.5954	0.1359	0.1486	0.3607	-0.413	0.3984	0.3	-0.5498	0.7204
474	15	upper face (IV)	0.0484	0.0668	0.4688	0.0101	0.1027	0.9215	-0.2857	0.732	0.6964	-0.0563	0.0647	0.3843	-0.0908	0.2996	0.762	0.2347	0.1281	0.0668	-0.1135	0.1663	0.495	0.0471	0.131	0.7191	0.1506	0.1118	0.1779	0.0094	0.1325	0.9437	0.0681	0.1447	0.6381	0.1731	0.1148	0.1316	-0.0382	0.1401	0.7851	0.1283	0.159	0.4196	0.1582	0.4287	0.7121	-0.613	0.8205
475	15	upper face (IV)	-0.103	0.0673	0.1259	0.0853	0.0822	0.2993	-0.8283	1.1002	0.4515	-0.0453	0.0781	0.562	0.051	0.2268	0.8219	-0.041	0.1072	0.7023	0.0155	0.1533	0.9193	0.1251	0.0998	0.2101	-0.0616	0.0916	0.501	0.0353	0.1481	0.8116	0.1347	0.111	0.2248	-0.1504	0.0988	0.128	0.2673	0.1113	0.0163	0.1043	0.1503	0.4876	-0.0213	0.3525	0.9519	-0.1973	0.5202
476	15	upper face (IV)	0.4661	0.6662	0.4842	0.1043	0.2838	0.7132	-1.1149	2.6476	0.6737	0.3524	0.523	0.5004	0.2193	0.945	0.8165	-0.0423	0.3264	0.8969	-0.1938	0.4494	0.6663	0.223	0.3532	0.5278	0.0344	0.2683	0.898	-0.2761	0.4413	0.5316	-0.5672	0.6436	0.3782	0.1076	0.275	0.6955	-0.3676	0.5844	0.5294	-0.6693	1.1563	0.5627	-1.1794	2.2023	0.5923	-1.5097	3.0242
477	15	upper face (IV)	0.0418	0.0613	0.4957	0.1111	0.0842	0.1869	-0.05	0.5806	0.9313	-0.0097	0.0657	0.8827	-0.3562	0.2849	0.2111	0.1248	0.1311	0.3409	0.1881	0.1751	0.2826	-0.0885	0.1	0.3763	0.0389	0.101	0.7001	0.0545	0.1357	0.6878	0.1241	0.1087	0.2534	0.1498	0.0983	0.1276	0.069	0.1031	0.5034	0.057	0.1305	0.6624	-0.2893	0.3659	0.4291	0.312	0.5567
478	15	upper face (IV)	-0.0107	0.065	0.8688	-0.0408	0.0956	0.6699	-0.7576	1.0283	0.4613	-0.0182	0.0658	0.7819	0.0678	0.2628	0.7963	0.1803	0.1225	0.1411	0.0935	0.1542	0.5441	0.185	0.1124	0.0998	0.1527	0.1015	0.1325	0.0837	0.1353	0.5359	0.0925	0.1428	0.5171	0.0853	0.1006	0.3963	0.0348	0.1124	0.7569	-0.0443	0.1428	0.7566	-0.0192	0.3644	0.9579	-0.186	0.4872
479	15	upper face (IV)	0.188	0.07	0.0072	-0.1038	0.0797	0.1927	-0.3042	0.7107	0.6686	0.0798	0.066	0.2267	0.0125	0.262	0.962	0.0427	0.1009	0.6717	-0.0133	0.1557	0.9319	-0.0053	0.1056	0.9603	-0.0287	0.1025	0.7793	-0.0049	0.1361	0.9712	0.0789	0.1236	0.5231	0.024	0.1024	0.8144	0.1647	0.1062	0.1208	0.0496	0.1403	0.7238	0.1356	0.3456	0.6947	0.4634	0.5838
480	15	upper face (IV)	-0.0603	0.0709	0.3954	0.2199	0.1032	0.0331	0.6995	0.9702	0.4709	-0.0075	0.0776	0.9232	0.165	0.3032	0.5864	0.0315	0.1306	0.8093	-0.0354	0.1794	0.8437	0.1958	0.1117	0.0796	-0.1198	0.1158	0.3009	0.1247	0.1579	0.4297	0.1344	0.12	0.2628	-0.0781	0.1024	0.4457	0.0172	0.1235	0.8891	0.1411	0.1625	0.385	-0.3598	0.4011	0.3697	-1.0173	0.9525
481	15	upper face (IV)	0.067	0.0665	0.3136	0.1351	0.0696	0.0522	0.0546	0.5479	0.9206	0.0292	0.0655	0.6556	-0.4544	0.2567	0.0766	0.0572	0.0961	0.5516	-0.0156	0.131	0.9051	0.0907	0.0889	0.3078	-0.0585	0.0759	0.4408	-0.0862	0.1301	0.5073	-0.1037	0.0942	0.2709	-0.031	0.085	0.7151	-0.029	0.101	0.7741	-0.2483	0.122	0.0417	0.1616	0.3054	0.5967	-0.3157	0.5231
482	15	upper face (IV)	-0.0266	0.0862	0.7573	-0.0439	0.1136	0.6994	-1.0843	1.5573	0.4863	-0.0283	0.0848	0.7387	0.1632	0.3405	0.6317	0.1899	0.1531	0.2149	-0.1466	0.1906	0.4418	-0.07	0.1206	0.5616	-0.0256	0.1094	0.8152	-0.1559	0.1438	0.2783	-0.1761	0.1424	0.2164	-0.0423	0.1126	0.7069	-0.0743	0.1385	0.5918	-0.0406	0.1674	0.8084	0.4522	0.4803	0.3464	-0.253	0.7718
483	15	upper face (IV)	-0.0393	0.0804	0.6252	-0.1321	0.1122	0.2392	-0.342	0.9883	0.7293	-0.0351	0.0793	0.6583	-0.0371	0.3526	0.9163	0.0909	0.1592	0.5681	-0.1666	0.185	0.3677	-0.0549	0.1202	0.6481	-0.0689	0.1059	0.5151	-0.244	0.1447	0.0916	-0.196	0.1422	0.1681	-0.1371	0.1119	0.2204	-0.1543	0.1313	0.24	-0.1569	0.173	0.3643	0.5386	0.5028	0.2841	0.652	0.8537
484	15	upper face (IV)	-0.0833	0.081	0.304	-0.0933	0.0997	0.3495	-0.6556	0.9372	0.4842	-0.0413	0.0766	0.59	-0.4096	0.326	0.2089	-0.2273	0.1429	0.1116	-0.1075	0.1794	0.5489	-0.1566	0.1264	0.2156	-0.2145	0.1201	0.074	-0.156	0.1407	0.2673	-0.1945	0.1385	0.1603	-0.1382	0.1136	0.2235	-0.0162	0.1262	0.8979	-0.0697	0.1719	0.6853	0.0706	0.3967	0.8587	-0.347	0.6412
485	15	upper face (IV)	-0.1494	0.0657	0.023	0.0146	0.0694	0.8334	-0.1253	0.5129	0.807	-0.0924	0.0706	0.1905	0.3988	0.2519	0.1135	-0.0309	0.1097	0.7783	0.0196	0.1366	0.8857	0.0641	0.1033	0.5348	0.0233	0.0743	0.7537	0.2066	0.1337	0.1224	0.0654	0.1035	0.5272	0.0063	0.0947	0.9472	-0.1812	0.0898	0.0436	-0.0089	0.1416	0.9499	0.0745	0.3163	0.8138	-0.9066	0.8693
486	15	upper face (IV)	0.0819	0.0717	0.2536	0.153	0.0879	0.0816	-0.191	0.7031	0.7859	0.0842	0.0739	0.2548	-0.217	0.2847	0.4459	0.0128	0.1303	0.9218	0.0678	0.1693	0.6889	-0.034	0.1101	0.7577	-0.1824	0.1114	0.1014	-0.2179	0.1479	0.1408	-0.164	0.1408	0.2443	-0.104	0.1184	0.3798	0.0013	0.1118	0.9908	0.0678	0.1558	0.6637	0.83	0.5037	0.0994	0.3523	0.6396
487	15	upper face (IV)	0.1682	0.0683	0.0139	-0.0556	0.0699	0.426	0.0978	0.4843	0.8399	0.0419	0.0837	0.6161	-0.4606	0.2586	0.0749	0.0857	0.1073	0.4246	0.1579	0.1297	0.2234	-0.0569	0.1047	0.5872	0.1031	0.0813	0.2045	-0.0864	0.1424	0.5441	-0.0679	0.0969	0.4835	-0.0169	0.0942	0.8579	0.0116	0.0934	0.9011	0.229	0.1319	0.0825	-0.1666	0.321	0.6038	0.5908	0.743
488	15	upper face (IV)	0.1176	0.0731	0.1077	0.0724	0.0897	0.4195	0.3789	0.7459	0.6115	0.0205	0.0829	0.8048	-0.2297	0.2743	0.4025	0.0407	0.1211	0.7367	0.4015	0.1465	0.0061	-0.0364	0.1144	0.7506	0.0986	0.095	0.2994	0.0013	0.1435	0.9928	-0.0397	0.1246	0.75	0.0125	0.1076	0.9073	-0.0099	0.1115	0.9294	0.2841	0.1468	0.0529	0.1765	0.3527	0.6168	0.4486	0.6381
489	15	upper face (IV)	0.0289	0.0667	0.6649	0.1164	0.0886	0.1892	0.6049	0.8562	0.4799	0.056	0.0621	0.3675	0.3174	0.3173	0.3172	-0.0649	0.1282	0.6127	0.1845	0.1812	0.3085	0.0298	0.1074	0.7816	-0.1972	0.1229	0.1086	-0.0846	0.134	0.5279	-0.0913	0.127	0.4718	-0.0037	0.0997	0.9703	0.0113	0.1144	0.9213	0.062	0.1717	0.7183	0.3264	0.3526	0.3546	0.0445	0.5461
490	15	upper face (IV)	0.0971	0.0596	0.1034	0.0344	0.07	0.6233	0.0916	0.5756	0.8736	0.0507	0.0607	0.4037	-0.4465	0.2721	0.1009	-0.0756	0.1078	0.4827	-0.0244	0.1545	0.8746	0.0489	0.0987	0.6201	0.004	0.0859	0.9626	-0.0946	0.1337	0.479	-0.1572	0.1035	0.1288	-0.0969	0.0934	0.2995	-0.1608	0.1122	0.1517	-0.1763	0.1448	0.2233	-0.1459	0.3034	0.6307	-0.5108	0.6235
491	15	upper face (IV)	0.0313	0.0511	0.5402	0.0426	0.0702	0.5438	0.0304	0.5133	0.9528	0.0278	0.0494	0.5739	0.1037	0.2172	0.6332	-0.0912	0.1041	0.3811	-0.1036	0.1349	0.4426	-0.0345	0.1041	0.7404	-0.0626	0.0851	0.4622	0.0081	0.1119	0.9421	-0.0494	0.1018	0.6276	-0.1388	0.0893	0.1199	0.0789	0.1043	0.4492	0.1605	0.1329	0.2272	0.0344	0.3202	0.9145	-0.1404	0.4223
492	15	upper face (IV)	0.2514	0.2158	0.2442	-0.0761	0.2257	0.736	0.7538	1.6332	0.6444	-0.061	0.1561	0.6957	0.4284	0.5959	0.4722	0.1052	0.2785	0.7055	-0.1821	0.3184	0.5674	-0.2444	0.2921	0.4027	-0.3752	0.2958	0.2046	-0.5404	0.4519	0.2317	-0.3481	0.2947	0.2376	-0.237	0.2618	0.3654	0.0699	0.2417	0.7726	0.2609	0.3372	0.4391	-0.6649	0.874	0.4468	1.1754	1.4128
493	15	upper face (IV)	0.2342	0.0801	0.0034	-0.0577	0.0961	0.5486	-0.8413	1.2009	0.4836	0.1147	0.0802	0.1524	-0.1708	0.298	0.5666	0.2682	0.1371	0.0505	0.2553	0.1792	0.1541	-0.0322	0.1129	0.7752	0.0507	0.1185	0.6685	-0.1254	0.1518	0.409	-0.105	0.1354	0.4379	0.1508	0.1229	0.2199	0.0699	0.1383	0.6133	0.0904	0.1706	0.5962	-0.2923	0.4152	0.4815	0.2977	0.7086
494	15	upper face (IV)	-0.0902	0.0761	0.2359	0.0115	0.0952	0.904	0.5955	0.9842	0.5451	0.0457	0.0788	0.5618	-0.598	0.3857	0.121	-0.1424	0.1588	0.3701	-0.2256	0.2242	0.3144	-0.0939	0.1355	0.4884	-0.1682	0.1418	0.2356	-0.0966	0.1839	0.5993	-0.1242	0.1577	0.4309	-0.0642	0.1293	0.6197	-0.0738	0.1574	0.6389	0.1631	0.1878	0.3851	-0.3305	0.4916	0.5014	-0.5345	0.8483
495	15	upper face (IV)	-0.0161	0.0654	0.8051	-0.0049	0.0888	0.9563	-0.1159	0.6835	0.8653	-0.0016	0.0688	0.9814	-0.0408	0.2579	0.8742	0.1595	0.1103	0.1483	-0.1427	0.1618	0.3778	-0.0386	0.1089	0.7229	-0.0871	0.0982	0.3752	-0.2352	0.1368	0.0856	-0.1391	0.1296	0.2832	0.0379	0.1065	0.7219	-0.036	0.103	0.727	-0.1695	0.1544	0.2722	0.0033	0.3593	0.9928	-0.48	0.694
496	15	upper face (IV)	-0.0026	0.0599	0.9657	-0.0436	0.085	0.6077	0.5691	0.8447	0.5005	0.0168	0.0577	0.7712	0.2794	0.2549	0.2731	-0.0869	0.1036	0.4017	0.0774	0.1399	0.5803	0.1143	0.0832	0.1694	-0.0205	0.0849	0.809	0.052	0.1092	0.6338	-0.1307	0.1054	0.2149	0.0275	0.0888	0.7565	0.0229	0.096	0.8113	0.0067	0.1279	0.958	0.0184	0.2908	0.9494	0.1466	0.4791
497	15	upper face (IV)	-0.01	0.0692	0.885	0.1334	0.0905	0.1404	-0.2559	0.6816	0.7073	-0.0226	0.0697	0.7459	-0.1001	0.2382	0.6744	-0.0863	0.1146	0.4516	0.0212	0.1346	0.8747	-0.0082	0.1106	0.9412	-0.0296	0.0958	0.7575	0.1375	0.1421	0.3334	-0.0068	0.1114	0.9515	-0.0373	0.1007	0.711	0.2032	0.1192	0.0883	-0.1026	0.1374	0.4555	0.4891	0.4234	0.2481	-0.2784	0.623
498	15	upper face (IV)	-0.119	0.0625	0.0568	-0.104	0.088	0.2373	-0.0475	0.5722	0.9339	-0.1538	0.0666	0.021	0.0137	0.2748	0.9602	0.0122	0.1108	0.9124	-0.1043	0.1489	0.4837	0.0703	0.1058	0.5067	-0.0468	0.0971	0.63	-0.0586	0.1283	0.6478	-0.0307	0.1145	0.7887	-0.0283	0.0975	0.7718	0.1987	0.1152	0.0846	-0.1076	0.1477	0.4662	-0.2818	0.357	0.4299	0.3779	0.5768
499	15	upper face (IV)	-0.0153	0.0546	0.7795	0.0366	0.0759	0.6294	0.4014	0.7759	0.6049	-0.0668	0.0592	0.2594	-0.2571	0.29	0.3754	0.0928	0.0932	0.3195	0.0996	0.1419	0.4827	-0.0467	0.0909	0.6076	0.0825	0.0941	0.3806	0.0703	0.1174	0.5496	0.004	0.1192	0.9735	-0.072	0.0943	0.4451	-0.218	0.1149	0.0577	-0.1813	0.1296	0.1619	0.4233	0.3901	0.2778	0.3205	0.5652
500	15	upper face (IV)	-0.0731	0.075	0.3299	0.0409	0.0836	0.6247	0.0823	0.6228	0.8949	0.016	0.0704	0.8199	-0.2086	0.308	0.4984	0.0632	0.1283	0.6222	0.1719	0.1776	0.3332	-0.0405	0.1076	0.7065	-0.0174	0.1037	0.8667	0.0993	0.1327	0.4543	0.0443	0.1295	0.7322	0.0597	0.1068	0.576	0.1542	0.1201	0.1991	0.1351	0.1775	0.4465	0.985	0.5876	0.0937	0.2653	0.598
501	15	upper face (IV)	-0.0989	0.0627	0.1145	-0.0356	0.0834	0.6693	-0.3095	0.7004	0.6586	-0.0459	0.0659	0.4859	0.2254	0.2797	0.4204	-0.1298	0.1216	0.2858	-0.1094	0.1551	0.4804	-0.0471	0.107	0.6598	-0.1272	0.1089	0.2429	-0.0349	0.1332	0.7931	0.1361	0.1322	0.3031	-0.1081	0.1049	0.3026	-0.0901	0.1216	0.4589	-0.1564	0.1368	0.253	0.503	0.4596	0.2737	0.2193	0.5896
502	15	upper face (IV)	-0.0869	0.1279	0.4966	-0.0634	0.1743	0.7161	0.334	1.319	0.8001	-0.2146	0.1615	0.1839	-0.2291	0.5137	0.6557	0.1946	0.2636	0.4605	0.0632	0.289	0.827	0.089	0.1915	0.6423	0.4194	0.2866	0.1433	0.3947	0.2971	0.184	0.4646	0.3122	0.1367	0.1352	0.1858	0.4666	-0.1457	0.2228	0.5132	0.2007	0.2623	0.4442	-0.1595	0.599	0.79	-1.2069	1.4724
503	15	upper face (IV)	-0.032	0.0911	0.7255	-0.0851	0.1361	0.5317	1.0114	1.404	0.4713	-0.078	0.0972	0.4227	0.4254	0.3948	0.2813	-0.194	0.1729	0.2616	-0.1137	0.2385	0.6333	-0.0288	0.1397	0.8369	-0.0559	0.1498	0.7089	0.0919	0.2113	0.6635	0.1008	0.1654	0.5423	0.104	0.1418	0.4632	0.1319	0.1722	0.4439	-0.4005	0.2047	0.0504	-0.3612	0.4746	0.4467	1.5396	1.5409
504	16	philtrum (I)	0.0096	0.0639	0.8806	0.0565	0.0756	0.4548	-0.3127	0.6981	0.6542	0.03	0.0638	0.6385	-0.1222	0.2615	0.6404	-0.1272	0.1171	0.2771	-0.1979	0.1558	0.204	-0.0382	0.0997	0.7015	-0.0102	0.1004	0.9187	-0.0896	0.1201	0.4558	-0.0333	0.116	0.774	-0.0717	0.0904	0.4275	0.0205	0.1151	0.8588	-0.082	0.1353	0.5445	0.1993	0.332	0.5483	-0.2882	0.5652
505	16	philtrum (I)	0.0355	0.0625	0.5703	-0.0224	0.0797	0.779	-0.2574	0.6927	0.7102	0.0555	0.0598	0.3537	-0.0617	0.2459	0.8019	-0.0996	0.11	0.3654	-0.1426	0.1488	0.3379	0.0066	0.0891	0.9411	-0.0459	0.0904	0.6117	-0.0522	0.1135	0.6456	-0.0215	0.107	0.8409	-0.0135	0.0866	0.8761	0.0575	0.11	0.601	-0.106	0.139	0.4457	-0.1617	0.3566	0.6503	-0.1525	0.4963
506	16	philtrum (I)	-0.0201	0.1012	0.8425	0.2935	0.15	0.0504	-1.0006	1.5507	0.5188	0.1074	0.0991	0.2784	0.1167	0.4376	0.7898	-0.0305	0.1823	0.8672	-0.1619	0.2498	0.5168	0.1753	0.1557	0.2604	-0.0945	0.1749	0.5887	-0.1518	0.1993	0.4465	0.0283	0.1663	0.8647	-0.1869	0.1883	0.3209	-0.142	0.1928	0.4613	-0.3448	0.2821	0.2217	0.1933	0.5767	0.7375	-0.191	0.9125
507	16	philtrum (I)	0.0489	0.0703	0.4869	-0.0537	0.0838	0.5216	0.0237	0.7003	0.973	0.0782	0.0757	0.3019	-0.0435	0.3119	0.889	-0.2114	0.1395	0.1297	-0.2933	0.1809	0.1049	-0.1449	0.1147	0.2064	-0.0431	0.1121	0.7009	-0.0428	0.1348	0.751	-0.119	0.1288	0.3555	-0.0475	0.1014	0.6393	0.1488	0.1278	0.2443	-0.1303	0.1645	0.4283	0.1617	0.3603	0.6535	-0.2205	0.5636
508	16	philtrum (I)	0.0408	0.0773	0.5974	-0.0753	0.0882	0.3929	0.1611	0.7589	0.8319	0.0331	0.0794	0.6768	-0.199	0.2761	0.471	-0.1162	0.1306	0.3736	-0.0012	0.1672	0.9944	0.025	0.1075	0.8163	-0.0438	0.1004	0.6622	-0.0997	0.139	0.4733	0.0291	0.1353	0.8298	-0.0688	0.1135	0.5443	-0.0044	0.133	0.9736	0.2436	0.151	0.1067	-0.1162	0.369	0.7528	0.0725	0.5988
509	16	philtrum (I)	0.0467	0.0612	0.4447	-0.0932	0.0847	0.2713	0.4737	0.7826	0.545	0.0468	0.0627	0.4552	-0.1076	0.2593	0.6782	0.0165	0.116	0.8866	0.2057	0.1566	0.189	0.1137	0.0986	0.2487	0.0275	0.1015	0.7866	0.0114	0.121	0.9252	0.0249	0.1132	0.8262	0.0855	0.0964	0.3751	-0.0679	0.1166	0.5602	0.2488	0.1364	0.0681	-0.3906	0.376	0.2988	0.4798	0.6137
510	16	philtrum (I)	0.0392	0.1052	0.7095	0.0503	0.1319	0.7028	-0.493	1.1677	0.6729	0.1365	0.1073	0.2034	0.2248	0.4003	0.5744	-0.0508	0.1727	0.7688	-0.1742	0.2467	0.4802	0.0496	0.1462	0.7344	-0.0867	0.161	0.5903	-0.0111	0.1963	0.9551	-0.0657	0.1691	0.6977	-0.0058	0.1528	0.9696	0.0442	0.1873	0.8136	-0.4262	0.2742	0.1201	-0.1865	0.5383	0.7289	-0.021	0.74
511	16	philtrum (I)	0.0052	0.0907	0.9546	-0.2727	0.1372	0.0469	1.1113	1.4057	0.4292	-0.0538	0.0934	0.5644	0.0561	0.3612	0.8766	0.0197	0.1497	0.8951	0.1674	0.2094	0.4241	-0.0849	0.135	0.5297	-0.0435	0.1325	0.7425	0.1076	0.1731	0.534	0.0321	0.1475	0.8277	0.018	0.1365	0.8953	0.1338	0.1598	0.4027	0.3424	0.2104	0.1037	-0.1383	0.5122	0.7872	0.4054	0.8678
512	16	philtrum (I)	0.0027	0.0887	0.9762	-0.2355	0.1209	0.0514	1.4334	1.8651	0.4422	-0.0248	0.0825	0.7632	-0.1919	0.4176	0.6458	-0.0634	0.1496	0.6717	0.0086	0.2154	0.9681	-0.0505	0.128	0.6929	0.0414	0.128	0.7461	0.1186	0.1676	0.4792	-0.0297	0.1379	0.8296	0.1228	0.1381	0.3739	0.1463	0.1334	0.2726	0.2988	0.2142	0.1631	-0.0038	0.4994	0.994	0.6019	0.9054
513	17	philtrum (I)	0.0621	0.0815	0.4458	0.087	0.0941	0.3555	0.4249	0.8364	0.6115	0.1621	0.0785	0.0389	-0.0798	0.3105	0.797	-0.1134	0.128	0.3757	0.1215	0.1789	0.497	-0.0354	0.1173	0.7631	-0.2006	0.1052	0.0566	-0.0082	0.1654	0.9606	0.0407	0.127	0.7487	-0.0818	0.1182	0.4889	-0.0868	0.1276	0.4964	-0.204	0.1828	0.2645	0.0094	0.3729	0.9799	-0.1742	0.6023
514	17	philtrum (I)	0.0964	0.0822	0.2408	-0.0257	0.0817	0.7528	-0.2948	0.8262	0.7212	-0.0028	0.0824	0.9727	0.1414	0.3247	0.6632	-0.1494	0.1542	0.3326	-0.0862	0.1984	0.6638	-0.1185	0.1246	0.3416	-0.0061	0.1124	0.957	-0.1309	0.1617	0.4182	-0.1452	0.1343	0.2797	-0.124	0.1121	0.2688	0.0358	0.1301	0.7832	-0.258	0.1646	0.117	0.2221	0.4248	0.6011	-0.474	0.7282
515	17	philtrum (I)	0.1073	0.09	0.2328	-0.0082	0.0928	0.9299	0.103	0.7714	0.8938	0.0384	0.0952	0.6867	0.2991	0.3407	0.38	-0.2377	0.168	0.1572	-0.2418	0.2283	0.2896	-0.1946	0.1355	0.1509	-0.0319	0.1149	0.7814	-0.1993	0.1784	0.2639	-0.2127	0.1439	0.1396	-0.1195	0.1245	0.3372	0.0917	0.1328	0.4898	-0.1051	0.1818	0.5631	0.2544	0.4428	0.5656	-0.2047	0.7007
516	17	philtrum (I)	0.0783	0.0811	0.3342	-0.0355	0.081	0.6612	-0.3972	0.8767	0.6505	0.0401	0.0844	0.6344	0.3001	0.3115	0.3353	-0.2178	0.1498	0.146	-0.0519	0.1903	0.7849	-0.109	0.115	0.3429	-0.0163	0.1027	0.874	-0.152	0.1578	0.3356	-0.1401	0.1247	0.2613	-0.088	0.1114	0.4294	0.0557	0.1224	0.6492	-0.1482	0.1619	0.3601	0.1424	0.3844	0.711	-0.2061	0.5853
517	17	philtrum (I)	0.0915	0.0825	0.2671	-0.0673	0.0912	0.4609	0.1462	0.6808	0.8299	0.138	0.0802	0.0852	-0.3236	0.2983	0.2781	0.0212	0.1311	0.8718	0.305	0.165	0.0644	-0.2112	0.1179	0.0732	-0.0342	0.0939	0.7158	0.0703	0.135	0.6026	-0.1209	0.1229	0.3255	0.0383	0.095	0.687	-0.0843	0.1225	0.4911	-0.0234	0.1417	0.8688	-0.1422	0.3988	0.7215	-0.4388	0.7054
518	17	philtrum (I)	-0.0473	0.0738	0.5215	-0.0604	0.0792	0.446	0.3381	0.6832	0.6207	-0.0704	0.0778	0.3655	-0.0329	0.2616	0.9	-0.0402	0.1288	0.7549	-0.1204	0.15	0.4222	0.0908	0.1099	0.4085	0.006	0.0969	0.9504	-0.0141	0.1533	0.9266	-0.0302	0.0997	0.7621	-0.2023	0.095	0.0333	-0.0602	0.0998	0.5462	-0.2101	0.1338	0.1163	0.279	0.3519	0.4279	0.0339	0.5049
519	17	philtrum (I)	-0.0392	0.071	0.5808	-0.0476	0.0872	0.5853	-0.2187	0.67	0.7441	0.0529	0.0787	0.5015	-0.0119	0.2598	0.9636	0.0308	0.1133	0.7857	0.3103	0.1571	0.0482	0.18	0.1047	0.0857	-0.0674	0.0866	0.4363	0.0918	0.1412	0.5156	0.0859	0.1064	0.4192	-0.1297	0.0943	0.1689	-0.1845	0.1036	0.075	-0.2253	0.1486	0.1293	0.027	0.3567	0.9396	-0.1551	0.5118
520	17	philtrum (I)	-0.0758	0.0766	0.322	-0.0484	0.09	0.5906	-0.4511	1.0027	0.6528	-0.1411	0.0802	0.0787	-0.0695	0.3013	0.8177	-0.1402	0.1613	0.385	-0.0656	0.1974	0.7397	-0.003	0.1215	0.9802	0.002	0.1161	0.9861	-0.1109	0.1608	0.4904	0.0087	0.1455	0.9522	-0.1012	0.1166	0.3856	0.1332	0.1322	0.3136	-0.1888	0.1593	0.2359	0.1627	0.4336	0.7074	0.2585	0.6309
521	17	philtrum (I)	-0.0122	0.071	0.8636	-0.0706	0.0856	0.4096	-0.0172	0.5867	0.9766	0.0542	0.0701	0.4391	0.5545	0.3477	0.1108	-0.0568	0.1205	0.6373	0.0108	0.1615	0.9465	-0.1012	0.1146	0.3774	0.0665	0.1183	0.5742	-0.0569	0.1444	0.6934	-0.1357	0.1293	0.2941	0.0938	0.1113	0.3994	0.0918	0.1124	0.4139	0.3235	0.1742	0.0634	0.0502	0.3817	0.8953	0.483	0.728
522	17	philtrum (I)	-0.0197	0.0659	0.7649	0.0071	0.0862	0.9342	0.1297	0.5927	0.8267	-0.1124	0.0632	0.0756	0.407	0.3148	0.196	0.0824	0.1098	0.453	-0.1637	0.1516	0.2802	0.0408	0.103	0.6924	0.142	0.1024	0.1654	-0.0401	0.1182	0.7342	-0.0223	0.1127	0.8433	0.1086	0.0956	0.256	0.1468	0.1126	0.1921	0.1656	0.1484	0.2644	0.1635	0.3665	0.6555	-0.1425	0.5366
523	17	philtrum (I)	0.0417	0.0652	0.5225	0.0195	0.0751	0.7955	0.7504	0.9952	0.4508	-0.0114	0.073	0.8762	0.2601	0.2295	0.2572	0.0241	0.1036	0.8165	-0.0391	0.131	0.7652	-0.137	0.0884	0.1214	0.0185	0.0799	0.8171	-0.0547	0.1345	0.6843	-0.1065	0.1005	0.2896	0.057	0.0854	0.5044	0.1193	0.0947	0.2079	0.0362	0.1252	0.7724	0.2786	0.3349	0.4054	-0.4621	0.544
524	18	philtrum (I)	0.007	0.0858	0.935	0.1358	0.084	0.1058	0.7453	1.0313	0.4698	-0.0506	0.0853	0.5532	0.2869	0.2686	0.2854	0.1332	0.1282	0.2989	-0.2107	0.1794	0.2404	0.1061	0.1098	0.3337	0.0175	0.0941	0.8527	0.1417	0.1429	0.3213	0.0093	0.1111	0.9334	0.0703	0.1254	0.575	0.1752	0.1087	0.1072	-0.0343	0.1528	0.8226	-0.4781	0.4165	0.251	0.623	0.7333
525	18	philtrum (I)	0.0232	0.0947	0.8064	0.0216	0.1219	0.8592	0.5823	1.0152	0.5663	-0.159	0.0967	0.1003	0.0279	0.3809	0.9416	0.2721	0.1594	0.0878	-0.2171	0.2102	0.3018	-0.0319	0.138	0.8173	0.1359	0.1359	0.3175	0.0374	0.1701	0.8261	-0.0428	0.1414	0.7621	0.1228	0.1474	0.4048	0.0809	0.1533	0.5976	-0.0865	0.1978	0.6621	0.0029	0.4937	0.9953	-0.256	0.7285
526	18	philtrum (I)	0.0941	0.0743	0.2054	-0.0136	0.0816	0.8681	0.5547	0.9982	0.5784	0.0845	0.0749	0.2596	0.0296	0.2695	0.9126	-0.0401	0.1234	0.7456	-0.1999	0.16	0.2116	-0.2085	0.1118	0.0622	-0.139	0.09	0.1224	-0.1275	0.1462	0.3831	-0.1192	0.1268	0.3476	-0.0983	0.1003	0.3269	0.0048	0.107	0.9641	0.0376	0.1484	0.7999	0.3954	0.4082	0.3327	-0.8084	0.8594
527	18	philtrum (I)	-0.0707	0.1499	0.6372	0.0759	0.1811	0.6752	1.2705	1.8443	0.4909	-0.0135	0.1444	0.9256	0.2759	0.5318	0.6039	-0.6159	0.3524	0.0805	-0.1984	0.3164	0.5308	-0.0011	0.1728	0.9948	-0.2583	0.212	0.2231	0.1137	0.2537	0.6541	-0.1918	0.2484	0.4401	-0.1527	0.1984	0.4416	-0.2275	0.2407	0.3444	-0.3292	0.262	0.2089	-0.6464	0.7495	0.3885	-0.0761	1.0537
528	18	philtrum (I)	-0.0366	0.0821	0.6559	0.0285	0.0799	0.7214	0.2272	0.6974	0.7446	0.0214	0.0938	0.8199	-0.0784	0.2326	0.736	-0.1967	0.1085	0.0697	-0.2751	0.1586	0.0827	-0.0935	0.1195	0.4342	-0.2342	0.1036	0.0237	0.0327	0.1669	0.8447	-0.0949	0.1193	0.4266	-0.2673	0.1106	0.0156	-5.2826e-05	0.1178	0.9996	-0.2072	0.1572	0.1875	-0.1809	0.353	0.6082	-0.1587	0.5104
529	18	philtrum (I)	0.1328	0.1023	0.1942	0.1056	0.1174	0.3687	1.1234	1.5033	0.4549	0.0665	0.1064	0.532	0.7229	0.4329	0.095	-0.0657	0.1577	0.677	0.0404	0.2056	0.8444	-0.1027	0.1485	0.489	-0.075	0.1389	0.5891	0.0687	0.1911	0.7193	-0.121	0.1623	0.4558	-0.059	0.1372	0.667	0.0472	0.1737	0.7858	0.2624	0.2217	0.2366	-0.0396	0.4577	0.9311	1.3937	1.3258
530	18	philtrum (I)	-0.0638	0.0772	0.4087	-0.143	0.0761	0.0601	0.2327	0.7408	0.7535	-0.0749	0.073	0.3048	-0.0845	0.3005	0.7785	-0.0442	0.1298	0.7332	-0.0509	0.1746	0.7707	-0.0401	0.1103	0.7162	0.0203	0.1062	0.8485	0.0271	0.1376	0.8437	0.0058	0.1264	0.9631	0.0746	0.1112	0.5025	-0.0805	0.1229	0.5128	0.1234	0.1506	0.4125	0.1902	0.4039	0.6376	-0.1366	0.5365
531	19	philtrum (I)	0.0458	0.0764	0.549	-0.328	0.1047	0.0017	-0.2582	0.8991	0.774	-0.0788	0.0808	0.329	-0.1108	0.3259	0.7339	-0.2068	0.1367	0.1303	-0.2165	0.185	0.2419	-0.2911	0.1276	0.0226	0.0286	0.117	0.8066	0.0966	0.1608	0.5482	-0.2012	0.1369	0.1417	0.0706	0.1209	0.5592	0.263	0.1488	0.0771	-0.1154	0.175	0.5095	0.272	0.4173	0.5145	-0.1744	0.5891
532	19	philtrum (I)	0.0592	0.0634	0.3505	0.2028	0.0956	0.0338	0.8176	1.1418	0.474	0.1221	0.0691	0.0775	0.2573	0.2748	0.3491	-0.0954	0.1237	0.4407	-0.026	0.1586	0.8697	0.135	0.106	0.203	-0.1918	0.1078	0.0751	-0.0097	0.1216	0.9364	0.006	0.13	0.963	-0.1082	0.1107	0.3284	-0.1389	0.1238	0.262	-0.0037	0.1591	0.9814	-0.0451	0.3484	0.8969	-0.4444	0.6507
533	19	philtrum (I)	-0.0823	0.0569	0.1481	-0.0358	0.0731	0.6244	-0.859	1.1471	0.4539	-0.0186	0.0584	0.7501	-0.07	0.2606	0.7882	-0.0298	0.094	0.7514	0.0152	0.1474	0.9178	0.0331	0.083	0.69	0.0419	0.0929	0.6523	-0.115	0.1095	0.2938	-0.178	0.0936	0.0573	0.0594	0.0967	0.5394	0.1573	0.0999	0.1152	0.1008	0.1256	0.4222	0.046	0.3023	0.879	-0.1387	0.4792
534	19	philtrum (I)	-0.0539	0.0764	0.4804	-0.1336	0.0845	0.1141	-0.6009	0.9409	0.523	-0.0919	0.0801	0.2509	-0.4919	0.3238	0.1287	0.0678	0.13	0.602	-0.0798	0.1759	0.6501	0.0195	0.1073	0.856	0.0896	0.1044	0.3906	0.0021	0.1206	0.9862	0.0973	0.13	0.4543	0.1007	0.1159	0.3853	0.0664	0.1461	0.6494	-0.1617	0.1736	0.3514	-0.0403	0.4041	0.9206	-0.5013	0.7408
535	20	nose (II)	0.0116	0.0759	0.879	0.2448	0.1219	0.0446	-0.104	0.7955	0.896	-0.0085	0.0756	0.9102	-0.3896	0.3499	0.2655	0.0057	0.1534	0.9704	0.1078	0.1898	0.5699	0.0467	0.1264	0.7119	-0.2323	0.1381	0.0925	0.1289	0.162	0.4261	-0.1594	0.1543	0.3015	0.0048	0.1248	0.9696	-0.2529	0.161	0.1162	-0.09	0.1911	0.6379	0.2615	0.4683	0.5766	-1.3204	1.2727
536	20	nose (II)	-0.0327	0.0702	0.6417	-0.0142	0.0721	0.8438	-0.65	0.9329	0.486	-0.0277	0.0753	0.7136	0.3647	0.2759	0.1862	0.0331	0.1139	0.7714	-0.1668	0.159	0.2944	0.0825	0.0963	0.3914	0.0331	0.085	0.6966	0.0637	0.1295	0.6228	0.1188	0.1122	0.2898	0.0151	0.0923	0.8701	0.146	0.0997	0.1429	-0.0602	0.1284	0.6391	-0.2045	0.3644	0.5746	0.5868	0.7006
537	20	nose (II)	-0.0383	0.0875	0.6613	-0.1043	0.0688	0.1293	-0.3281	0.792	0.6787	0.0198	0.0883	0.8221	0.1154	0.2723	0.6716	-0.0256	0.1185	0.8292	-0.0252	0.1539	0.8701	-0.0906	0.1108	0.4131	-0.0392	0.085	0.6447	0.0093	0.1636	0.9545	-0.0154	0.096	0.8726	0.0901	0.0915	0.3249	-0.1791	0.1059	0.0908	0.0722	0.131	0.5817	-0.2139	0.3262	0.512	0.8282	0.8353
538	21	nose (II)	0.0567	0.0926	0.5408	-0.091	0.1015	0.3697	-0.0659	0.7151	0.9266	-0.0983	0.0958	0.305	0.2227	0.3219	0.489	-0.1787	0.1501	0.2338	-0.3966	0.216	0.0664	-0.0493	0.1353	0.7156	-0.0774	0.1256	0.5376	-0.0486	0.2048	0.8123	-0.2591	0.1784	0.1463	-0.3457	0.1452	0.0173	0.0138	0.1412	0.9221	-0.3898	0.195	0.0456	-0.1834	0.3871	0.6357	0.0639	0.6448
539	21	nose (II)	-0.0604	0.0442	0.1715	0.0366	0.0644	0.5698	-0.5851	0.8317	0.4818	-0.0675	0.0494	0.1713	0.0002	0.2069	0.9994	0.0312	0.0826	0.7051	-0.1542	0.1096	0.1593	-0.1959	0.0827	0.0178	0.1013	0.0768	0.1872	-0.0047	0.1013	0.9632	-0.1524	0.0925	0.0994	0.0876	0.0829	0.2912	0.1014	0.0954	0.2878	-0.0289	0.1061	0.7851	0.1938	0.2676	0.469	0.3629	0.5041
540	21	nose (II)	0.0783	0.1019	0.4422	-0.1794	0.15	0.2317	-0.5357	1.1628	0.645	0.0216	0.0901	0.8106	-0.0196	0.388	0.9598	0.3469	0.2008	0.0841	0.0786	0.2329	0.7358	0.1721	0.148	0.245	0.0491	0.1423	0.7301	0.4682	0.2422	0.0533	-0.0413	0.1681	0.8057	0.2686	0.1742	0.1231	0.0638	0.169	0.7058	-0.1289	0.2193	0.5565	-0.2679	0.4974	0.5902	-0.1582	0.7978
541	21	nose (II)	-0.0397	0.0533	0.4565	0.0056	0.0757	0.9412	0.221	0.6114	0.7177	0.028	0.0529	0.5965	0.3757	0.2687	0.162	-0.06	0.1183	0.612	-0.14	0.1428	0.3271	0.1512	0.0977	0.1218	-0.0076	0.0839	0.9274	0.0502	0.1138	0.6591	0.1837	0.1117	0.1002	-0.0128	0.0954	0.8931	-0.0594	0.1104	0.5905	0.1187	0.1364	0.3839	0.0264	0.3093	0.932	0.146	0.5021
542	21	nose (II)	0.0401	0.1103	0.7165	0.1357	0.1364	0.3197	-0.5625	1.2876	0.6622	-0.0394	0.1158	0.7338	0.4789	0.5151	0.3526	-0.3108	0.2719	0.2531	-0.2243	0.3237	0.4885	-0.2317	0.2445	0.3434	-0.1398	0.1903	0.4625	-0.1089	0.2577	0.6726	-0.2001	0.2599	0.4414	-0.4624	0.3403	0.1741	0.0113	0.2225	0.9593	-0.4281	0.3678	0.2445	-0.1724	0.6919	0.8032	-0.4839	0.8585
543	21	nose (II)	-0.0016	0.0756	0.983	-0.0264	0.0689	0.702	0.3289	0.6313	0.6024	0.0385	0.0782	0.623	-0.1812	0.2478	0.4646	0.1173	0.1088	0.2809	0.2404	0.1441	0.0952	-0.1205	0.0936	0.1981	-0.1035	0.0858	0.2279	-0.1402	0.1471	0.3405	0.0068	0.097	0.9445	0.1281	0.0858	0.1352	0.0228	0.0934	0.8068	0.1076	0.1283	0.4018	0.0369	0.2934	0.8999	0.1626	0.4893
544	21	nose (II)	-0.063	0.2167	0.7711	-0.2083	0.4422	0.6376	2.4392	5.0107	0.6264	0.051	0.2257	0.8211	-1.2433	1.9435	0.5224	0.8925	3.778	0.8132	0.5374	3.0096	0.8583							1.0005	5.5081	0.8559	0.7415	3.4279	0.8288				-0.4209	1.7155	0.8062	0.6292	3.6687	0.8638	-0.1055	1.1806	0.9288	-1.0671	2.4388
545	21	nose (II)	0.0316	0.0857	0.7122	-0.213	0.0924	0.0211	-0.1886	0.6511	0.7721	0.137	0.0859	0.1107	0.0881	0.2994	0.7684	0.1625	0.1373	0.2365	0.3758	0.178	0.0347	0.0948	0.1184	0.4234	-0.0172	0.1056	0.8707	-0.0229	0.1635	0.8884	0.2224	0.1247	0.0746	0.1359	0.1096	0.2149	0.108	0.1185	0.3624	0.4931	0.1773	0.0054	0.0142	0.3622	0.9688	-0.0399	0.5686
546	21	nose (II)	-0.0692	0.0628	0.2703	0.2141	0.0834	0.0103	0.123	0.6027	0.8382	-0.0859	0.0678	0.205	-0.2532	0.2933	0.388	-0.0101	0.1188	0.9326	-0.0347	0.1482	0.8149	-0.0724	0.1016	0.4765	0.0292	0.1077	0.7862	-0.1229	0.128	0.3371	-0.1468	0.1129	0.1937	0.0214	0.0952	0.822	-0.0333	0.1083	0.7582	-0.1833	0.1354	0.1758	0.2933	0.3605	0.4159	0.6296	0.7147
547	21	nose (II)	0.1365	0.0538	0.0112	-0.1236	0.0811	0.1275	-0.104	0.4942	0.8333	0.1298	0.0579	0.0251	-0.081	0.2322	0.727	0.0715	0.0986	0.4682	0.0965	0.1293	0.4556	0.0709	0.0854	0.4065	0.0301	0.0882	0.733	0.0398	0.1071	0.7101	-0.0393	0.0996	0.6932	-0.0738	0.093	0.4274	0.0492	0.1002	0.6237	-0.0561	0.1117	0.6153	-0.4336	0.3366	0.1976	-0.2387	0.5404
548	21	nose (II)	-0.0974	0.072	0.1759	-0.1643	0.0823	0.046	0.641	0.9395	0.4951	-0.107	0.0668	0.1095	-0.2052	0.2383	0.3892	0.111	0.1086	0.3066	-0.1329	0.1548	0.3904	0.1331	0.1034	0.1978	-0.0831	0.0878	0.3438	0.0742	0.1301	0.5687	0.0878	0.1105	0.4272	-0.0704	0.0957	0.4622	0.0597	0.1049	0.5691	-0.0929	0.1176	0.4296	0.1216	0.304	0.689	-0.1505	0.5317
549	21	nose (II)	-0.0562	0.0723	0.4373	-0.0374	0.0667	0.5757	0.3037	0.601	0.6133	-0.0081	0.0749	0.9141	-0.2357	0.2389	0.3238	0.1201	0.1094	0.2725	0.2536	0.1369	0.064	-0.0151	0.0911	0.8686	0.0056	0.0886	0.9494	-0.0118	0.1406	0.9331	0.0674	0.1072	0.5294	0.2274	0.0945	0.0161	-0.0564	0.1054	0.5925	0.2018	0.1239	0.1034	0.253	0.3389	0.4553	0.1778	0.4774
550	21	nose (II)	0.0656	0.0731	0.3697	-0.1066	0.1051	0.3104	0.6166	0.9819	0.53	-0.0052	0.0752	0.9454	-0.0012	0.3009	0.9969	0.07	0.1333	0.5992	0.0021	0.1631	0.9898	0.0357	0.1008	0.723	-0.1726	0.1148	0.1327	-0.0614	0.1456	0.6733	-0.1094	0.1345	0.4159	-0.1194	0.1181	0.3119	0.0527	0.1232	0.6691	-0.3017	0.1641	0.0659	-0.4473	0.4072	0.272	-0.0291	0.679
551	21	nose (II)	-0.0978	0.0536	0.0682	0.146	0.1011	0.1488	-0.5075	0.9505	0.5934	-0.0999	0.0585	0.0879	0.1421	0.2861	0.6194	-0.0711	0.1135	0.5308	-0.1323	0.1371	0.3345	-0.0831	0.0934	0.3735	0.0276	0.0928	0.7661	0.1238	0.1146	0.2799	0.1012	0.1211	0.4031	0.0598	0.094	0.5249	-0.0429	0.107	0.6887	-0.0202	0.1332	0.8793	0.5296	0.4282	0.2162	-0.2485	0.5154
552	21	nose (II)	-0.0292	0.0652	0.6544	0.0085	0.0834	0.9191	-0.6231	0.9206	0.4985	0.016	0.059	0.7869	0.1487	0.2502	0.5522	0.1027	0.1044	0.3256	-0.0495	0.1563	0.7514	-0.0147	0.0961	0.8783	0.0948	0.0916	0.3002	0.0221	0.13	0.865	0.071	0.1111	0.5229	0.1366	0.1004	0.1735	0.105	0.1086	0.3336	0.2144	0.1497	0.1522	0.3517	0.3768	0.3506	0.0219	0.5087
553	21	nose (II)	-0.0235	0.089	0.7918	-0.2685	0.1169	0.0216	0.7015	1.112	0.5282	-0.003	0.0978	0.9752	-0.2938	0.3627	0.4179	0.104	0.1602	0.5163	-0.0466	0.2211	0.833	0.031	0.1447	0.8306	-0.0041	0.1224	0.9736	0.1889	0.1871	0.3126	0.0712	0.1547	0.6454	0.1124	0.1361	0.4088	-0.1478	0.1445	0.3065	0.1367	0.1906	0.4732	-0.0021	0.4629	0.9963	0.3361	0.6094
554	21	nose (II)	-0.0186	0.0725	0.7975	-0.2739	0.1169	0.0191	0.241	0.8142	0.7673	0.0427	0.0753	0.5703	0.077	0.3435	0.8225	0.0245	0.1307	0.8515	0.1184	0.1819	0.5152	0.2121	0.1346	0.115	-0.045	0.1152	0.6959	0.0706	0.1347	0.6005	0.2542	0.1477	0.0852	0.0282	0.1218	0.817	0.0274	0.1311	0.8342	0.4736	0.1907	0.013	-0.0993	0.4215	0.8138	-0.1388	0.6164
555	22	nose (II)	-0.0213	0.0697	0.7598	-0.0465	0.082	0.5705	0.572	0.8474	0.4997	-0.121	0.0713	0.0899	0.1187	0.2933	0.6857	0.1256	0.1182	0.2879	-0.2444	0.1664	0.142	0.0018	0.0949	0.9849	0.018	0.103	0.8614	0.0234	0.1297	0.8568	-0.0911	0.1137	0.4227	0.0166	0.1223	0.892	0.0484	0.1204	0.6873	-0.1533	0.1563	0.3268	0.7529	0.474	0.1122	-0.0419	0.5155
556	22	nose (II)	-0.0163	0.0672	0.8086	-0.1497	0.0848	0.0775	0.4813	0.8029	0.5489	-0.0277	0.0646	0.6683	0.099	0.2872	0.7303	0.0967	0.1214	0.4259	-0.174	0.169	0.3031	-0.0538	0.1029	0.6007	0.1159	0.1079	0.2829	0.036	0.1196	0.7633	0.006	0.1199	0.9602	0.0595	0.1197	0.6192	0.0345	0.1153	0.7648	-0.039	0.1574	0.8041	0.5727	0.4069	0.1593	0.4147	0.6352
557	22	nose (II)	0.0269	0.0553	0.6266	-0.0172	0.0703	0.8065	-0.0086	0.4994	0.9862	-0.0475	0.0566	0.4013	0.3286	0.2559	0.1992	0.0379	0.0962	0.6936	-0.1025	0.1236	0.407	0.0548	0.0884	0.5348	-0.0315	0.0856	0.7127	-0.0691	0.1064	0.5161	0.0798	0.1017	0.4327	-0.049	0.0882	0.5783	-0.044	0.0935	0.6378	-0.186	0.1219	0.1272	0.3011	0.2887	0.2969	-0.3195	0.505
558	22	nose (II)	-0.0376	0.0707	0.5952	-0.1385	0.094	0.1409	-0.3437	0.8365	0.6811	-0.0759	0.0712	0.2866	0.0475	0.2903	0.87	0.1115	0.1168	0.3398	-0.1447	0.1596	0.3646	-0.154	0.103	0.1349	0.0361	0.1086	0.7396	-0.0272	0.1315	0.8361	-0.2017	0.122	0.0981	-0.1171	0.1118	0.2946	-0.0236	0.1231	0.8479	-0.2465	0.1525	0.1059	0.7148	0.4846	0.1402	0.0771	0.5535
559	22	nose (II)	-0.0417	0.073	0.5683	-0.002	0.1093	0.9855	-0.0202	0.7855	0.9795	0.0183	0.0826	0.8246	0.0804	0.3585	0.8225	-0.0321	0.1542	0.8353	0.0509	0.2023	0.8015	0.0856	0.1509	0.5705	0.0816	0.1326	0.5386	0.0715	0.1737	0.6807	0.0984	0.1463	0.5011	0.1211	0.132	0.359	0.1608	0.164	0.3269	0.0881	0.1978	0.6562	-0.4152	0.4799	0.3869	0.1791	0.6405
560	22	nose (II)	0.0126	0.0795	0.8735	-0.024	0.0818	0.7693	1.0016	1.3374	0.4539	0.0171	0.0784	0.8276	-0.0459	0.2746	0.8674	0.0347	0.1163	0.7655	0.0156	0.1636	0.9241	0.0989	0.1094	0.3658	0.0527	0.0939	0.5743	0.1197	0.1673	0.4741	0.162	0.1143	0.1563	0.1094	0.0998	0.2732	0.1348	0.1219	0.2691	0.0752	0.1463	0.6072	-0.0724	0.356	0.8389	-0.0253	0.4737
561	22	nose (II)	0.0462	0.0688	0.5017	0.074	0.0907	0.4148	-0.7782	1.0339	0.4516	0.0447	0.0723	0.5359	-0.4664	0.328	0.155	0.0664	0.1194	0.5781	0.3107	0.1899	0.1018	0.2155	0.126	0.0871	0.0735	0.0968	0.4478	0.0837	0.1292	0.517	0.2209	0.1327	0.0959	-0.0179	0.1121	0.8733	-0.0348	0.1172	0.7664	0.0737	0.1568	0.6382	-0.2957	0.3473	0.3946	-0.391	0.6624
562	22	nose (II)	0.036	0.077	0.6405	-0.019	0.0714	0.7898	-0.388	0.7367	0.5984	0.0885	0.0735	0.2286	0.3263	0.2534	0.1979	-0.2171	0.1321	0.1003	-0.0164	0.1678	0.9223	0.0714	0.1134	0.5288	-0.0144	0.0886	0.8711	-0.0612	0.1472	0.6776	-5.6475e-05	0.0991	0.9995	-0.0945	0.1039	0.363	0.0274	0.1046	0.7933	-0.0201	0.1476	0.8916	0.1282	0.2879	0.6562	0.2963	0.5401
563	22	nose (II)	-0.0294	0.0724	0.6849	0.0133	0.0921	0.8848	0.5019	0.8777	0.5674	-0.0053	0.0672	0.9375	0.004	0.3091	0.9897	0.1128	0.1245	0.3652	-0.1017	0.1848	0.5822	-0.0386	0.116	0.7395	0.0943	0.111	0.3957	0.0169	0.153	0.9122	-0.0218	0.1161	0.8511	-0.0104	0.1264	0.9345	-0.047	0.1438	0.7438	-0.2744	0.1647	0.0957	0.5386	0.4407	0.2217	0.3141	0.6696
564	22	nose (II)	0.0214	0.0885	0.8091	-0.1102	0.0772	0.1535	-0.8767	1.1449	0.4438	0.0359	0.092	0.6965	0.2294	0.2984	0.4421	-0.0877	0.142	0.5369	0.1168	0.1715	0.4958	0.0666	0.1295	0.6069	-0.0489	0.1044	0.6394	-0.0411	0.1772	0.8167	0.0701	0.1202	0.56	-0.1192	0.1197	0.3192	0.0816	0.1175	0.4876	0.0656	0.1747	0.7074	0.3234	0.3823	0.3976	0.2211	0.5175
565	22	nose (II)	-0.0151	0.0754	0.8413	0.088	0.1051	0.4029	-0.5781	1.0296	0.5745	0.0832	0.0896	0.3526	-0.1488	0.3012	0.6212	0.1737	0.1572	0.2692	0.0923	0.2062	0.6545	-0.0491	0.121	0.6851	0.1393	0.1216	0.2521	0.0813	0.1644	0.6208	-0.2265	0.141	0.1081	0.0954	0.1343	0.4774	0.0887	0.1436	0.537	-0.0889	0.1652	0.5907	0.3006	0.428	0.4825	0.2009	0.6288
566	22	nose (II)	-0.0193	0.0781	0.8043	0.02	0.1045	0.8481	0.1752	0.8093	0.8286	-0.0636	0.082	0.4377	0.1924	0.3474	0.5797	0.1438	0.1431	0.3152	0.2091	0.2118	0.3236	-0.0685	0.14	0.6247	-0.0115	0.1294	0.9291	-0.0166	0.1499	0.9117	-0.0281	0.1354	0.8354	-0.0063	0.1371	0.9633	0.0117	0.1592	0.9412	0.0612	0.1829	0.7381	0.416	0.4611	0.367	-0.4543	0.7327
567	22	nose (II)	0.0575	0.0812	0.479	0.1377	0.096	0.1514	-0.4221	0.8887	0.6348	0.0601	0.0832	0.4701	0.0999	0.2917	0.7319	-0.0995	0.1464	0.4967	0.0475	0.1785	0.79	-0.1242	0.1211	0.3051	-0.2025	0.1211	0.0944	-0.0853	0.1445	0.5548	-0.0885	0.1217	0.4673	-0.1972	0.1314	0.1335	-0.2755	0.1417	0.0519	-0.2156	0.1591	0.1752	0.0745	0.3635	0.8376	0.3542	0.6453
568	22	nose (II)	-0.0143	0.0563	0.799	-0.1014	0.072	0.159	0.9658	1.1999	0.4209	-0.0581	0.0548	0.2891	-0.0754	0.237	0.7505	0.1307	0.0898	0.1454	-0.0666	0.1136	0.5575	-0.1005	0.0856	0.2402	0.0371	0.0731	0.6115	-0.0879	0.1034	0.3954	-0.1181	0.0907	0.193	0.0836	0.0788	0.2884	-0.0585	0.1105	0.5968	-0.0515	0.1233	0.6761	0.0831	0.2771	0.7642	-0.466	0.5431
569	22	nose (II)	0.0708	0.1194	0.5533	-0.0102	0.1204	0.9324	-0.463	1.0312	0.6535	-0.0103	0.1556	0.947	0.3317	0.4401	0.451	0.0674	0.1756	0.701	0.1918	0.2311	0.4065	0.035	0.1957	0.8582	-0.1075	0.1364	0.4309	-0.057	0.2772	0.8372	0.0057	0.154	0.9705	-0.0245	0.173	0.8872	0.0522	0.1557	0.7372	0.1097	0.212	0.6048	0.3092	0.54	0.567	-0.4961	0.9081
570	22	nose (II)	-0.0136	0.0585	0.8157	-0.0453	0.0709	0.5223	0.3915	0.741	0.5973	-0.0616	0.0603	0.307	-0.2451	0.2258	0.2777	0.2303	0.0954	0.0157	0.0378	0.1401	0.7871	0.1394	0.0882	0.1141	-0.0198	0.0842	0.8144	-0.0389	0.1146	0.7341	-0.0323	0.1034	0.7544	-0.0503	0.0878	0.5667	-0.1017	0.1023	0.3198	-0.1066	0.1304	0.4135	0.1979	0.3294	0.548	-0.7333	0.7225
571	22	nose (II)	-0.0198	0.0713	0.7817	0.1563	0.0785	0.0465	-0.392	0.7155	0.5838	-0.0235	0.0695	0.7347	-0.0276	0.2906	0.9244	-0.0595	0.1118	0.5949	0.0011	0.1548	0.9942	-0.0115	0.1017	0.9103	-0.0026	0.0998	0.9796	-0.043	0.1292	0.7395	0.1034	0.1209	0.3924	0.0794	0.1163	0.4947	-0.1946	0.1276	0.1273	0.0134	0.164	0.9348	-0.645	0.4364	0.1394	0.2408	0.5679
572	22	nose (II)	-0.0328	0.0802	0.6821	-0.0208	0.1073	0.8464	-0.1655	0.782	0.8324	-0.043	0.0844	0.6101	0.3434	0.3203	0.2837	-0.2175	0.141	0.1228	-0.1394	0.1992	0.4841	0.0397	0.1333	0.7659	-0.0329	0.1114	0.7674	-0.1095	0.1494	0.4636	-0.1193	0.1427	0.4031	0.0996	0.1147	0.3852	0.1215	0.1446	0.401	0.1649	0.171	0.3347	0.0008	0.389	0.9984	0.6186	0.8162
573	22	nose (II)	0.0196	0.1207	0.8711	-0.0318	0.1322	0.8098	-0.71	1.1137	0.5238	0.0996	0.1222	0.4151	-0.5119	0.4387	0.2432	0.2157	0.18	0.2308	0.5351	0.283	0.0586	-0.0863	0.1707	0.6133	0.2377	0.1734	0.1704	0.1627	0.2597	0.5309	0.2372	0.1974	0.2294	0.2688	0.1765	0.1278	0.3116	0.1893	0.0998	0.4245	0.2568	0.0983	-0.3032	0.5324	0.569	0.1267	0.7797
574	23	nose (II)	0.0569	0.1159	0.6234	-0.1133	0.1642	0.4903	-1.0562	1.7544	0.5472	-0.0285	0.1086	0.7931	0.1224	0.4559	0.7884	0.39	0.3068	0.2037	-0.1796	0.3086	0.5606	-0.165	0.2202	0.4536	0.0524	0.1859	0.778	0.0093	0.2347	0.9683	-0.1482	0.2264	0.5127	-0.0673	0.2077	0.7459	-0.1422	0.2278	0.5326	-0.2949	0.3239	0.3626	0.664	0.7302	0.3632	0.7479	1.2083
575	23	nose (II)	-0.0247	0.0784	0.7527	-0.048	0.0783	0.5397	0.4891	0.8774	0.5772	-0.0929	0.0808	0.2505	0.3611	0.3028	0.2331	-0.0303	0.1192	0.7995	-0.22	0.1688	0.1923	0.004	0.1122	0.9718	-0.1641	0.1152	0.1542	-0.0331	0.1727	0.8482	0.0031	0.1271	0.9808	-0.0484	0.109	0.6571	0.0001	0.1107	0.9992	-0.1047	0.1752	0.5501	-0.076	0.3605	0.833	-0.4446	0.6228
576	23	nose (II)	0.0799	0.086	0.3531	0.0616	0.1151	0.5926	0.1856	0.8317	0.8234	0.0648	0.0889	0.4658	-0.0598	0.3165	0.8501	0.3566	0.1941	0.0661	0.158	0.2069	0.4453	-0.0248	0.1379	0.8573	0.1572	0.1299	0.2261	-0.0527	0.1747	0.7627	-0.0969	0.1755	0.5808	0.0353	0.1337	0.7917	-0.0528	0.1542	0.7319	-0.1415	0.2113	0.503	0.3029	0.4563	0.5068	-0.5923	0.8466
577	23	nose (II)	0.0412	0.0738	0.5765	-0.0645	0.0964	0.5036	1.2151	1.6449	0.4601	-0.0086	0.0741	0.9071	0.4863	0.3552	0.1709	-0.0374	0.1347	0.7815	-0.0238	0.165	0.8853	-0.1082	0.1236	0.3817	0.112	0.1063	0.2923	0.0108	0.1383	0.9378	-0.0573	0.1393	0.681	-0.0239	0.1167	0.8374	0.0354	0.1448	0.8068	-0.0708	0.1642	0.6662	0.0078	0.3711	0.9832	-0.374	0.6865
578	23	nose (II)	0.1636	0.0683	0.0167	-0.1249	0.0709	0.0781	0.353	0.6708	0.5987	0.1319	0.0661	0.0461	0.234	0.2646	0.3766	-0.096	0.1052	0.3614	-0.0064	0.1509	0.9661	-0.0639	0.1014	0.5285	0.0716	0.0947	0.4495	-0.0681	0.1346	0.6129	-0.0261	0.1085	0.8102	-0.0808	0.1004	0.4212	-0.1361	0.1103	0.2173	0.014	0.143	0.9219	-0.0344	0.3576	0.9234	0.1126	0.5346
579	23	nose (II)	-0.0195	0.0894	0.8275	-8.6484e-05	0.0812	0.9992	-0.3063	0.7463	0.6815	0.0361	0.0916	0.6932	-0.2832	0.2767	0.306	0.24	0.1143	0.0358	0.2556	0.1509	0.0903	0.1275	0.1231	0.3003	0.0362	0.0971	0.7097	0.0228	0.1688	0.8924	0.1663	0.1272	0.1911	0.0585	0.1041	0.5739	0.0201	0.1157	0.8621	0.091	0.1494	0.5426	-0.0216	0.3685	0.9532	0.6064	0.6986
580	23	nose (II)	-0.0125	0.0562	0.8237	-0.111	0.0764	0.1467	1.0405	1.3463	0.4396	0.0074	0.0581	0.8989	0.1489	0.2217	0.502	-0.0738	0.1036	0.4766	-0.1196	0.1395	0.3914	-0.0405	0.0873	0.6428	0.0959	0.0778	0.2175	0.0913	0.1125	0.4168	-0.0635	0.0965	0.5106	-0.0222	0.0799	0.781	-0.0392	0.1027	0.7024	-0.0257	0.1298	0.8427	-0.1134	0.2997	0.7053	0.3635	0.5173
581	24	lower face (III)	0.0159	0.0756	0.8332	-0.0474	0.0897	0.5973	0.094	0.6347	0.8823	0.0562	0.075	0.454	0.3549	0.2986	0.2346	0.1236	0.1303	0.3425	-0.3146	0.1904	0.0985	0.1082	0.1045	0.3005	-0.0046	0.1103	0.967	0.0997	0.1601	0.5334	0.1315	0.1287	0.3068	-0.0047	0.1008	0.9625	0.068	0.112	0.5437	-0.005	0.1672	0.9762	0.2886	0.3882	0.4571	0.5638	0.7019
582	24	lower face (III)	0.0294	0.0846	0.7282	-0.1391	0.1063	0.1905	0.3006	0.8389	0.7201	0.0215	0.0819	0.7926	0.3895	0.3598	0.2789	0.0414	0.1422	0.7707	-0.349	0.2339	0.1356	0.1966	0.1227	0.1091	-0.1728	0.1262	0.171	0.0079	0.1597	0.9606	0.0517	0.1417	0.7154	-0.0465	0.1186	0.6949	0.017	0.1283	0.8944	0.0521	0.1827	0.7754	0.1561	0.4384	0.7218	0.5203	0.7239
583	24	lower face (III)	0.0818	0.1448	0.5718	0.0693	0.1623	0.6694	0.6049	1.3821	0.6616	0.0863	0.149	0.5625	-0.2123	0.5244	0.6856	0.0204	0.2523	0.9357	0.0997	0.3024	0.7417	-0.0869	0.1924	0.6516	-0.0811	0.2002	0.6856	-0.2475	0.2843	0.3841	-0.2845	0.2605	0.2748	0.2477	0.2404	0.303	0.3249	0.2959	0.2722	0.192	0.3258	0.5555	-0.2897	0.6903	0.6747	-0.5213	1.3176
584	24	lower face (III)
585	24	lower face (III)	0.0371	0.0572	0.5162	0.0725	0.0754	0.3365	-0.6776	0.998	0.4972	0.0547	0.0576	0.3419	0.0316	0.2276	0.8897	-0.107	0.1029	0.2985	-0.0375	0.1478	0.7997	0.0991	0.0902	0.272	-0.1837	0.093	0.0483	0.0359	0.1149	0.7546	-0.0591	0.1136	0.6026	-0.1697	0.1013	0.0938	-0.0178	0.1028	0.8628	0.0013	0.1314	0.992	-4.691e-05	0.3107	0.9999	-0.1275	0.5019
586	24	lower face (III)	0.0607	0.1007	0.5463	0.0388	0.1372	0.7773	-1.1101	1.6692	0.506	0.0777	0.1079	0.4717	-1.1891	0.7431	0.1095	-0.0786	0.1781	0.6591	0.1254	0.2284	0.5829	0.1647	0.1551	0.2883	0.0668	0.1535	0.6632	0.1929	0.2062	0.3495	0.1379	0.1653	0.4044	0.1042	0.1427	0.4652	-0.0935	0.1754	0.5939	-0.0812	0.2107	0.6999	0.3937	0.6603	0.551	-0.4341	0.9121
587	24	lower face (III)	0.0053	0.0829	0.949	-0.0249	0.0973	0.798	0.1233	0.8046	0.8782	-0.1211	0.0851	0.1547	-0.3425	0.3326	0.303	0.2099	0.1531	0.1704	0.4307	0.203	0.0339	0.0516	0.1267	0.6839	0.2078	0.1268	0.1012	0.1212	0.1634	0.4585	-0.0119	0.1478	0.9357	0.0464	0.1164	0.6903	0.197	0.1435	0.1698	0.1048	0.1809	0.5624	-0.5951	0.5277	0.2594	0.7201	0.8371
588	24	lower face (III)	-0.0545	0.109	0.6171	-0.0612	0.1234	0.6199	1.5803	2.0607	0.4432	-0.0539	0.1149	0.6388	0.4738	0.3768	0.2087	-0.116	0.1465	0.4285	0.0052	0.1938	0.9784	-0.1074	0.1631	0.5099	-0.0685	0.1227	0.5769	-0.0619	0.236	0.793	-0.0418	0.1454	0.7739	-0.1631	0.1409	0.2472	0.1317	0.1676	0.4319	0.0293	0.1968	0.8815	-0.2591	0.4594	0.5728	-0.075	0.6352
589	24	lower face (III)	-0.1037	0.0972	0.2858	0.0881	0.1092	0.4195	-0.2426	0.8799	0.7827	-0.0308	0.0983	0.7542	0.5779	0.3705	0.1188	0.1206	0.1774	0.4964	-0.0846	0.2129	0.6911	-0.0739	0.1408	0.5998	0.1272	0.1379	0.3563	0.1464	0.1925	0.447	0.0953	0.1555	0.5399	-0.0764	0.1365	0.5757	-0.0244	0.1579	0.8772	-0.0435	0.1977	0.826	-0.1464	0.472	0.7565	-0.0641	0.6542
590	25	lower face (III)	-0.0299	0.0526	0.5696	-0.0109	0.0678	0.8717	-0.0699	0.5102	0.891	0.0302	0.0522	0.5637	0.2218	0.2089	0.2884	0.0429	0.0877	0.6247	-0.1971	0.1189	0.0973	-0.1021	0.0755	0.176	0.0448	0.0756	0.5534	-0.0592	0.0891	0.5059	-0.0586	0.0967	0.5446	-0.0241	0.0679	0.723	0.0791	0.0882	0.3701	-0.0623	0.1086	0.5664	-0.3047	0.3065	0.3202	0.1351	0.4404
591	25	lower face (III)	-0.0474	0.0591	0.4224	0.0371	0.0678	0.5843	0.2499	0.5983	0.6762	0.0034	0.0546	0.9507	0.3139	0.2229	0.1591	0.0816	0.1016	0.4222	-0.111	0.1292	0.3905	-0.0875	0.0818	0.2845	0.0474	0.087	0.5856	-0.0538	0.0955	0.573	-0.0746	0.1089	0.493	0.0276	0.079	0.7266	0.1084	0.0963	0.2606	-0.1162	0.1191	0.3295	-0.1345	0.296	0.6497	-0.0081	0.4342
592	25	lower face (III)	-0.1386	0.0791	0.0799	0.1186	0.1	0.2354	0.6102	0.9424	0.5174	-0.0475	0.0806	0.5555	0.3478	0.3191	0.2757	-0.1844	0.135	0.1718	-0.1388	0.1703	0.4148	0.101	0.1322	0.4449	0.0594	0.1212	0.6242	-0.0223	0.1574	0.8873	0.1754	0.1348	0.1932	0.1084	0.1306	0.4068	0.0394	0.1313	0.7645	-0.1253	0.1585	0.4295	0.4122	0.4504	0.3601	0.0384	0.5275
593	25	lower face (III)	-0.1073	0.0619	0.0832	-0.0249	0.0803	0.7564	-0.3421	0.6518	0.5997	-0.0596	0.0587	0.3099	-0.3868	0.2342	0.0986	0.0195	0.1016	0.8481	0.1727	0.1472	0.2406	-0.0397	0.0968	0.6817	0.129	0.0872	0.1391	0.0151	0.1147	0.8956	0.1124	0.1083	0.2994	0.0645	0.0878	0.4626	0.0828	0.1145	0.4692	0.2257	0.1227	0.0658	0.023	0.3095	0.9408	-0.3717	0.5747
594	25	lower face (III)	-0.0892	0.0706	0.2064	0.1304	0.09	0.1476	-0.1595	0.6692	0.8117	0.0361	0.0706	0.6094	0.0895	0.2995	0.765	0.0597	0.1136	0.5991	-0.1414	0.1511	0.3494	-0.0797	0.094	0.3962	0.1585	0.1012	0.1172	-0.0337	0.126	0.7889	-0.0379	0.1212	0.7547	0.1444	0.1026	0.1591	0.1539	0.1199	0.1994	0.1259	0.1426	0.3773	0.2861	0.3631	0.4307	-0.1571	0.536
595	25	lower face (III)	0.0787	0.0757	0.2983	0.0443	0.0935	0.6359	0.0641	0.5959	0.9143	0.0359	0.0786	0.6478	-0.0743	0.264	0.7783	0.1284	0.1196	0.2827	0.044	0.1666	0.7918	-0.0138	0.1169	0.9059	0.0018	0.1	0.9855	-0.0958	0.1577	0.5437	-0.0746	0.1164	0.5216	-0.0195	0.1197	0.8707	-0.0881	0.1246	0.4796	-0.0106	0.1583	0.9468	-0.3296	0.3664	0.3683	-0.2592	0.5951
596	25	lower face (III)	0.0662	0.0671	0.3243	0.0429	0.0815	0.5992	0.6653	0.9378	0.478	0.0485	0.0694	0.4848	-0.1111	0.2709	0.6818	-0.0303	0.1098	0.7823	0.1711	0.1581	0.2791	0.1008	0.0995	0.3111	0.0209	0.0932	0.8228	-0.0893	0.1323	0.4997	-0.0938	0.1122	0.4028	0.0733	0.0955	0.4432	-0.0702	0.1182	0.5528	0.0289	0.1403	0.8366	-0.1097	0.3603	0.7608	0.1912	0.5153
597	25	lower face (III)	-0.0251	0.0649	0.699	0.041	0.0873	0.6387	0.36	0.7755	0.6425	-0.0025	0.0688	0.9706	0.084	0.2975	0.7777	-0.2116	0.1164	0.0691	-0.1792	0.1664	0.2815	-0.0075	0.1148	0.9478	-0.0904	0.1048	0.3881	-0.0076	0.1281	0.9528	0.0578	0.1137	0.6115	-0.2288	0.12	0.0566	-0.1436	0.1273	0.2593	0.0926	0.1683	0.5821	-0.0783	0.3299	0.8125	-0.0389	0.4967
598	25	lower face (III)	0.0642	0.0655	0.3269	-0.1094	0.0919	0.2335	0.0711	0.603	0.9061	0.0317	0.0696	0.6488	0.2013	0.2728	0.4607	0.1957	0.1193	0.101	0.1939	0.1692	0.2518	0.1361	0.0976	0.1632	-0.0499	0.0973	0.6083	0.0105	0.1465	0.9428	0.0199	0.1207	0.8689	0.0172	0.1107	0.8768	-0.0189	0.1237	0.8787	-0.058	0.1527	0.7041	-0.2321	0.3305	0.4826	0.3822	0.5685
599	25	lower face (III)	0.0375	0.0722	0.6039	-0.1542	0.114	0.1763	-0.2749	0.7772	0.7236	0.0044	0.0747	0.9529	-0.1383	0.3183	0.664	0.1745	0.1407	0.2149	0.3125	0.2026	0.1228	0.1753	0.1259	0.1637	0.0021	0.1181	0.9856	-0.023	0.1483	0.8766	0.1595	0.1386	0.2499	-0.0093	0.1294	0.943	-0.0237	0.1292	0.8543	0.163	0.175	0.3516	-0.0745	0.3764	0.8432	0.4988	0.7519
600	25	lower face (III)	0.0557	0.056	0.3195	0.034	0.0797	0.6701	-0.412	0.7692	0.5923	0.0996	0.0603	0.0987	0.2733	0.256	0.2856	0.0679	0.1071	0.526	-0.0615	0.149	0.6799	-0.0841	0.0946	0.374	0.0031	0.0963	0.9745	0.0153	0.1209	0.8992	-0.1104	0.1071	0.3027	0.0833	0.0903	0.3564	-0.0662	0.1188	0.5775	-0.0298	0.1432	0.8349	0.3493	0.3857	0.3651	0.2527	0.5345
601	25	lower face (III)	0.0628	0.0551	0.2539	-0.022	0.0727	0.762	0.4705	0.7733	0.5429	0.0097	0.0552	0.8605	0.3458	0.2839	0.2233	-0.138	0.1087	0.2041	-0.0459	0.1464	0.7536	-0.0469	0.0919	0.6094	-0.2064	0.0865	0.017	-0.1206	0.1011	0.2327	-0.1931	0.1102	0.0797	-0.2598	0.0976	0.0077	0.0323	0.1033	0.7543	-0.0843	0.1354	0.5332	-0.156	0.3335	0.6399	0.1308	0.5213
602	25	lower face (III)	-0.0779	0.0657	0.2362	0.0368	0.0715	0.6064	0.3267	0.6459	0.613	-0.1146	0.0668	0.0864	-0.0011	0.2596	0.9966	0.2175	0.1111	0.0504	0.3815	0.1568	0.015	0.1663	0.1125	0.1394	0.0749	0.0924	0.4177	0.2756	0.1385	0.0466	0.1706	0.1252	0.1732	0.0744	0.1009	0.4609	0.0399	0.1052	0.7044	0.0187	0.1337	0.889	0.3988	0.3436	0.2458	-0.2971	0.5535
603	25	lower face (III)	-0.0474	0.0635	0.4555	0.0082	0.0839	0.9223	-1.2309	1.5476	0.4264	-0.0084	0.0655	0.8977	0.0812	0.2896	0.7792	-0.0814	0.1215	0.5028	-0.1418	0.1484	0.3393	-0.0228	0.1065	0.8306	0.1647	0.1115	0.1397	0.1096	0.1192	0.3577	0.1276	0.1209	0.2913	0.1651	0.1042	0.1129	0.132	0.1169	0.2589	-0.097	0.1555	0.5328	0.1957	0.3588	0.5856	0.1527	0.5198
604	25	lower face (III)	-0.1448	0.1142	0.2047	-0.0235	0.1492	0.8747	1.4165	2.0422	0.4879	-0.1072	0.1161	0.356	-0.1818	0.4513	0.6871	-0.0245	0.1953	0.9002	0.1199	0.2658	0.6519	0.0567	0.178	0.75	0.0834	0.15	0.5781	0.0075	0.1965	0.9695	0.1208	0.1778	0.4969	0.156	0.1721	0.3646	0.1163	0.1855	0.5305	0.3752	0.2723	0.1682	0.2911	0.6037	0.6297	-0.0005	0.8451
605	25	lower face (III)	-0.0027	0.0561	0.9618	0.0314	0.0732	0.668	-0.2829	0.6536	0.6651	0.0584	0.0561	0.2974	0.0412	0.2125	0.8462	0.0243	0.1027	0.8128	0.1844	0.1262	0.144	0.0866	0.0823	0.2929	-0.0296	0.0782	0.7053	-0.064	0.1036	0.5368	0.0033	0.0866	0.9698	-0.133	0.0862	0.1229	0.0112	0.0893	0.8999	0.1308	0.1314	0.3196	0.2085	0.3077	0.4981	-0.2914	0.4744
606	25	lower face (III)	-0.0667	0.0663	0.3145	-0.0726	0.0902	0.4206	0.8514	1.2247	0.4869	-0.0633	0.0669	0.3446	-0.3377	0.3176	0.2877	0.1018	0.136	0.4544	0.2059	0.1862	0.2687	0.0527	0.1136	0.6426	-0.0054	0.097	0.9559	0.1225	0.131	0.3496	0.1346	0.1272	0.2899	0.0927	0.1068	0.3853	-0.1826	0.1286	0.1557	0.0834	0.1432	0.5602	-0.1704	0.3842	0.6575	-0.2112	0.5732
607	25	lower face (III)	-0.0931	0.0654	0.1544	0.0927	0.0766	0.2264	-0.1219	0.6066	0.8407	-0.0717	0.0617	0.2447	0.2397	0.2612	0.3588	0.0144	0.1062	0.8925	-0.1174	0.135	0.3846	0.0719	0.0898	0.4234	-0.1022	0.0948	0.281	0.0416	0.1266	0.7428	0.1502	0.109	0.1683	-0.1054	0.099	0.287	0.0298	0.1031	0.7725	-0.176	0.1385	0.2039	0.0514	0.2998	0.864	-0.2945	0.486
608	25	lower face (III)	-0.0869	0.0854	0.309	0.0321	0.1047	0.7591	-0.0901	0.7961	0.9099	-0.0726	0.092	0.4298	-0.1474	0.3629	0.6846	-0.0069	0.1604	0.9658	0.0548	0.2212	0.8044	0.1532	0.1427	0.283	-0.067	0.1111	0.5464	0.2085	0.1926	0.2789	0.188	0.1524	0.2172	0.2028	0.1506	0.1782	0.0667	0.1596	0.6762	-0.1294	0.1794	0.4706	-0.5449	0.5095	0.2848	-0.3617	0.6952
609	25	lower face (III)	-0.0544	0.066	0.4097	-0.0671	0.0732	0.3593	-0.3044	0.685	0.6568	0.0065	0.0598	0.9134	-0.1544	0.293	0.5983	-0.1048	0.1091	0.3368	0.2144	0.1592	0.1781	0.0991	0.0956	0.2998	0.2039	0.1113	0.0671	-0.0017	0.1274	0.9896	0.1776	0.1247	0.1544	0.1474	0.0989	0.1361	0.1059	0.1186	0.3719	0.3231	0.1575	0.0403	-0.1878	0.3345	0.5746	0.5096	0.6212
610	26	lower face (III)	0.0528	0.061	0.3866	0.1037	0.0686	0.1307	-0.2978	0.6442	0.644	0.0299	0.0578	0.6053	-0.0265	0.2474	0.9148	0.0434	0.1037	0.6755	-0.2221	0.1259	0.0776	0.0398	0.0912	0.6627	-0.0719	0.0914	0.4314	0.0186	0.118	0.8746	0.094	0.1032	0.3623	-0.0747	0.0906	0.4092	0.1196	0.1062	0.2603	0.0071	0.1251	0.9548	-0.1716	0.3111	0.5811	0.1034	0.479
611	26	lower face (III)	0.0214	0.0597	0.7199	0.0437	0.0668	0.5125	0.0567	0.5633	0.9199	0.047	0.0519	0.365	0.2047	0.2505	0.4139	0.0493	0.0948	0.6027	0.0858	0.1283	0.5037	0.0172	0.086	0.8417	0.0713	0.0904	0.4301	-0.0385	0.1114	0.7296	0.039	0.1038	0.7074	0.0346	0.0841	0.6805	0.2647	0.1033	0.0104	0.2364	0.1187	0.0464	-0.3668	0.3186	0.2497	0.0892	0.4526
612	26	lower face (III)	0.0006	0.0669	0.9932	0.1593	0.0729	0.029	-0.8794	1.153	0.4456	0.0128	0.077	0.8681	0.0836	0.2377	0.7252	-0.0475	0.1028	0.644	-0.1198	0.139	0.3889	0.0662	0.1005	0.5105	-0.0155	0.0769	0.84	-0.0268	0.1364	0.8443	-0.0696	0.1045	0.5054	-0.0095	0.102	0.9261	0.0237	0.1008	0.8139	-0.0557	0.1511	0.7125	-0.3684	0.3553	0.2998	-0.3725	0.517
613	26	lower face (III)	0.0108	0.0802	0.8931	0.0058	0.0922	0.9502	0.0055	0.6938	0.9937	0.0531	0.0831	0.5232	0.1327	0.2604	0.6102	0.1398	0.1352	0.3008	0.2017	0.161	0.2101	0.0059	0.1102	0.9571	0.0402	0.1118	0.7189	-0.2075	0.149	0.1638	-0.1161	0.1222	0.3423	-0.0393	0.1174	0.7377	0.1712	0.1391	0.2184	0.0132	0.1666	0.9367	0.2484	0.383	0.5167	0.4076	0.7301
614	26	lower face (III)	-0.044	0.0443	0.3211	0.0624	0.0736	0.3963	0.3008	0.6534	0.6453	-0.0775	0.0508	0.1267	-0.1244	0.2009	0.5358	0.0637	0.0959	0.5067	0.1385	0.1216	0.2547	0.031	0.0842	0.7126	0.0462	0.0833	0.5792	0.1765	0.1022	0.084	0.1086	0.0948	0.2521	0.1304	0.0848	0.1242	0.0414	0.0986	0.6746	-0.1636	0.1229	0.183	0.3657	0.3266	0.2629	-0.1826	0.4187
615	26	lower face (III)	-0.1443	0.0683	0.0347	-0.0828	0.085	0.33	0.9666	1.2074	0.4234	-0.0442	0.0643	0.492	-0.1429	0.2878	0.6196	-0.1145	0.1251	0.3598	0.1118	0.1674	0.5045	-0.0262	0.1082	0.8088	-0.1705	0.1212	0.1594	-0.1225	0.1232	0.3202	-0.1181	0.1268	0.3517	-0.0073	0.1057	0.9448	-0.0248	0.1153	0.83	-0.0026	0.1536	0.9866	-0.3174	0.3551	0.3714	-0.2257	0.5569
616	26	lower face (III)	0.0249	0.0652	0.7023	-0.1838	0.0803	0.022	0.1638	0.5945	0.7829	0.1087	0.0693	0.1164	-0.0421	0.2627	0.8727	-0.2478	0.1132	0.0285	-0.0677	0.1678	0.6867	-0.0938	0.0966	0.3318	-0.0883	0.1116	0.4286	-0.0131	0.1228	0.915	0.0238	0.1172	0.8391	-0.0631	0.1005	0.5302	-0.024	0.121	0.8425	0.1364	0.1328	0.3045	-0.3639	0.3781	0.3358	0.0583	0.4769
617	26	lower face (III)	-0.0229	0.0778	0.7683	0.095	0.1003	0.3434	-0.079	0.6922	0.9091	-0.0512	0.083	0.5376	0.1383	0.2782	0.6191	0.005	0.1206	0.9668	-0.2231	0.1584	0.1591	-0.0657	0.1069	0.5385	0.0354	0.0933	0.7041	0.1216	0.1519	0.4233	-0.0416	0.1185	0.7254	0.0111	0.1026	0.914	-0.0691	0.113	0.5407	0.0672	0.1476	0.6492	0.3086	0.3493	0.377	-0.3294	0.6291
618	26	lower face (III)	0.031	0.0579	0.5924	0.0606	0.0725	0.4029	0.5928	0.8124	0.4656	-0.0047	0.0601	0.9382	-0.2885	0.2664	0.2788	0.1378	0.101	0.1723	0.117	0.1312	0.3726	0.0466	0.0958	0.6266	-0.0126	0.0954	0.8951	0.011	0.1075	0.9183	-0.0475	0.1186	0.6888	0.0343	0.0784	0.6619	-0.1818	0.109	0.0955	-0.0914	0.1391	0.5108	0.2412	0.3061	0.4308	-0.28	0.5338
619	26	lower face (III)	-0.0317	0.0592	0.5927	-0.0389	0.0764	0.6102	0.0765	0.6506	0.9064	-0.101	0.0655	0.1231	0.172	0.2715	0.5263	0.1155	0.1028	0.2614	0.137	0.1514	0.3658	-0.0694	0.0937	0.4594	0.1607	0.0993	0.1058	0.0622	0.1171	0.5955	0.022	0.1118	0.8442	0.0989	0.1022	0.3332	0.077	0.1146	0.5019	0.0002	0.1463	0.9991	-0.1607	0.297	0.5884	0.0279	0.4906
620	26	lower face (III)	-0.0354	0.0578	0.5399	-0.0858	0.0774	0.2678	0.6419	0.8637	0.4573	-0.0621	0.0598	0.2993	-0.3176	0.2797	0.2561	0.0728	0.1169	0.5334	0.0289	0.141	0.8374	-0.0096	0.1025	0.9252	0.0368	0.0883	0.6768	0.124	0.1136	0.275	0.0522	0.1112	0.6385	-0.0302	0.0815	0.7112	-0.1921	0.0996	0.0538	0.1521	0.1431	0.2878	0.3502	0.3499	0.3169	0.0504	0.4793
621	26	lower face (III)	-0.0373	0.0683	0.5848	0.0338	0.0792	0.6694	0.1723	0.6506	0.7912	0.0736	0.0676	0.2761	0.4963	0.2952	0.0927	-1.5338e-05	0.1264	0.9999	-0.0036	0.1531	0.981	-0.0287	0.0968	0.7672	0.1948	0.1064	0.0671	0.062	0.1315	0.6373	-0.0397	0.1099	0.7176	0.0147	0.0983	0.8812	-0.023	0.1031	0.8234	0.3513	0.1491	0.0185	0.1333	0.3474	0.7011	0.3473	0.5583
622	26	lower face (III)	0.0769	0.0764	0.3138	0.1368	0.1037	0.187	-1.0392	1.5027	0.4892	-0.0086	0.0671	0.8985	-0.142	0.311	0.6479	0.2191	0.1629	0.1787	0.0249	0.1987	0.9002	0.0486	0.1151	0.6726	0.2303	0.135	0.0879	0.2528	0.1464	0.0842	0.1039	0.1389	0.4547	0.1742	0.1296	0.179	0.1188	0.1387	0.3915	-0.2215	0.1715	0.1965	-0.3419	0.4242	0.4202	-0.3211	0.6614
623	26	lower face (III)	-0.0379	0.0586	0.5179	-0.0182	0.0763	0.811	-1.0228	1.2791	0.4239	-0.0167	0.0521	0.7484	3.9824e-05	0.2584	0.9999	-0.1243	0.1163	0.2851	-0.162	0.157	0.3019	0.0325	0.0918	0.7235	0.156	0.1051	0.1376	0.0834	0.1138	0.4634	0.1608	0.1189	0.1761	0.0955	0.0975	0.3269	0.0277	0.1052	0.7922	-0.1505	0.1455	0.3009	-0.0911	0.3314	0.7833	0.0968	0.478
624	26	lower face (III)	-0.0099	0.0734	0.8928	-0.1478	0.0977	0.1302	0.8182	1.2083	0.4983	-0.0309	0.0769	0.6873	-0.3456	0.314	0.2711	0.0823	0.1278	0.5194	0.1086	0.1623	0.5032	0.0053	0.1245	0.9661	0.0483	0.1034	0.6403	0.0501	0.1473	0.7339	0.1656	0.1346	0.2184	-0.0159	0.1144	0.8894	-0.0875	0.1266	0.4895	-0.015	0.1728	0.931	0.4193	0.378	0.2673	0.4871	0.7084
625	26	lower face (III)	0.0485	0.0625	0.4376	0.0662	0.0826	0.4228	-0.13	0.671	0.8464	0.0623	0.0572	0.2755	0.2074	0.3094	0.5026	0.0691	0.1174	0.5559	0.0107	0.1524	0.944	-0.0387	0.0957	0.6856	0.1426	0.1028	0.1657	0.0268	0.1082	0.804	0.0588	0.115	0.609	-0.0486	0.0898	0.5884	0.1472	0.1182	0.2131	-0.0175	0.1613	0.9138	0.2042	0.366	0.5768	-0.3141	0.552
626	26	lower face (III)	0.0034	0.0612	0.956	0.033	0.0723	0.6477	0.2875	0.633	0.6497	-0.0513	0.0651	0.4306	-0.0671	0.2695	0.8033	0.0299	0.1132	0.792	0.0102	0.1367	0.9407	0.1127	0.0985	0.2525	-0.0068	0.0787	0.931	0.1862	0.1165	0.1099	0.0728	0.0984	0.4594	0.0544	0.0794	0.4936	0.1589	0.1055	0.1319	-0.2562	0.137	0.0614	-0.5404	0.4374	0.2167	-0.0249	0.4472
627	27	lower face (III)	0.048	0.0705	0.4961	-0.0901	0.1	0.368	-0.3405	0.8072	0.6732	-0.0946	0.0669	0.1577	-0.3248	0.317	0.3055	0.0619	0.1225	0.6135	-0.0951	0.1554	0.5408	0.1792	0.1167	0.1246	-0.0691	0.1085	0.5241	0.0719	0.1413	0.611	0.3279	0.1628	0.044	-0.186	0.1114	0.095	-0.1216	0.1304	0.3509	-0.0691	0.1633	0.6723	0.0651	0.3425	0.8494	-0.0747	0.6086
628	27	lower face (III)	0.1118	0.0898	0.2135	0.1466	0.1157	0.2052	-0.6233	1.1937	0.6016	0.081	0.0828	0.3282	0.1223	0.3617	0.7352	-0.0795	0.1571	0.6128	-0.3093	0.2306	0.1798	-0.1588	0.154	0.3026	0.1041	0.1399	0.4566	0.0613	0.1756	0.727	-0.3251	0.202	0.1076	0.0178	0.1452	0.9026	0.0748	0.1677	0.6555	-0.2412	0.2295	0.2932	0.8282	0.6612	0.2104	-0.9101	1.1048
629	27	lower face (III)	-0.0536	0.1243	0.6664	0.0744	0.1743	0.6696	-0.3562	1.3431	0.7908	-0.0978	0.1382	0.4791	-0.4152	0.5302	0.4335	0.1911	0.2182	0.3813	0.1442	0.3161	0.6482	0.0246	0.1983	0.9013	0.0045	0.1867	0.9809	0.2968	0.2672	0.2666	0.3155	0.2694	0.2415	0.0782	0.1901	0.6809	-0.2713	0.2681	0.3115	0.2204	0.2794	0.4303	0.5559	0.86	0.518	0.0222	1.0678
630	27	lower face (III)	-0.0411	0.062	0.507	0.0147	0.0756	0.846	-0.0833	0.6652	0.9003	-0.0338	0.0602	0.5748	0.4621	0.2896	0.1106	0.1572	0.1162	0.1762	0.1604	0.1514	0.2895	0.0351	0.0897	0.6951	0.0135	0.0934	0.8849	0.1042	0.1277	0.4143	0.1337	0.1071	0.2121	0.1118	0.101	0.2686	0.0256	0.1101	0.8159	0.0647	0.1405	0.6449	-0.4309	0.3898	0.2689	0.3378	0.5569
631	27	lower face (III)	-0.0533	0.0901	0.5541	0.0228	0.107	0.8316	-0.0845	0.7884	0.9147	-0.0531	0.0898	0.554	0.1256	0.3426	0.7139	-0.1277	0.1506	0.3967	-0.0997	0.1819	0.5838	-0.0692	0.1332	0.6034	0.0988	0.1254	0.431	0.0353	0.1802	0.8448	-0.209	0.1755	0.2338	0.0012	0.1117	0.9912	0.2249	0.1657	0.1748	0.0768	0.1892	0.685	0.1527	0.4522	0.7356	0.0586	0.7241
632	27	lower face (III)	-0.0527	0.0813	0.5165	-0.0316	0.1006	0.7536	0.906	1.2609	0.4724	0.0182	0.0868	0.8336	-0.1593	0.3349	0.6344	0.0095	0.1242	0.939	0.0396	0.1835	0.8289	-0.0246	0.1291	0.849	-0.0922	0.124	0.4571	0.0181	0.1566	0.908	0.001	0.1272	0.9936	-0.1608	0.1221	0.1879	0.0826	0.1397	0.5542	0.0272	0.1878	0.8848	0.2515	0.4113	0.5408	0.5842	0.8165
633	27	lower face (III)	0.0519	0.0923	0.5739	0.0048	0.105	0.9638	-0.9256	1.5155	0.5413	-0.0084	0.0935	0.9283	0.0648	0.3295	0.844	-0.0822	0.1566	0.5998	-0.1082	0.213	0.6116	-0.0015	0.1454	0.9916	-0.0783	0.1421	0.5816	-0.2687	0.1909	0.1591	-0.1916	0.1797	0.2864	-0.1793	0.1448	0.2156	0.1226	0.161	0.4461	-0.3007	0.2229	0.1774	-0.4844	0.5274	0.3584	-0.261	0.8151
634	27	lower face (III)	-0.1461	0.1005	0.1461	0.0808	0.1009	0.4228	0.2421	0.8725	0.7814	-0.0586	0.1147	0.6092	-0.3393	0.4	0.3964	-0.085	0.1513	0.574	-0.1967	0.1837	0.2841	-0.1946	0.1851	0.293	-0.0317	0.1359	0.8157	-0.0522	0.248	0.8332	-0.0466	0.1444	0.7468	0.0154	0.1298	0.9056	-0.2061	0.1621	0.2038	-0.1409	0.1846	0.4455	0.5889	0.5819	0.3116	0.5157	0.8324
635	27	lower face (III)	0.0456	0.0846	0.5903	-0.0135	0.0932	0.8849	0.0552	0.7484	0.9412	0.035	0.0883	0.692	0.1872	0.3059	0.5406	0.0456	0.1248	0.715	-0.0294	0.183	0.8724	0.1387	0.123	0.2594	0.0056	0.1136	0.9606	-0.1494	0.1848	0.4189	-0.0326	0.137	0.812	-0.1536	0.122	0.208	0.0923	0.1511	0.5413	0.0034	0.1615	0.9832	-0.4217	0.4236	0.3196	0.0004	0.6327
636	27	lower face (III)	-0.0305	0.0938	0.7447	-0.1355	0.1305	0.2991	0.6065	1.3818	0.6607	0.0374	0.0925	0.6862	-0.3171	0.4427	0.4739	0.0563	0.1904	0.7675	0.2828	0.2719	0.2983	0.1356	0.1731	0.4332	-0.086	0.1555	0.58	0.0344	0.1965	0.8612	0.0286	0.1966	0.8843	-0.0412	0.1588	0.7955	0.0255	0.1803	0.8875	0.4957	0.2833	0.0802	-0.3609	0.5309	0.4966	0.758	1.0933
637	27	lower face (III)	0.0549	0.069	0.4264	-0.0089	0.0926	0.9234	0.1212	0.7063	0.8637	0.1763	0.0853	0.0387	0.1123	0.2972	0.7056	-0.0891	0.1244	0.4737	-0.1973	0.1779	0.2674	-0.0172	0.1155	0.8813	0.0151	0.1207	0.9005	-0.0236	0.1455	0.871	0.1184	0.1469	0.4205	0.0079	0.1179	0.9466	-0.002	0.1412	0.9885	0.072	0.1654	0.6635	-0.4049	0.4281	0.3442	-0.0755	0.5968
638	28	upper face (IV)	0.0265	0.0748	0.7227	0.1583	0.1051	0.132	0.8052	1.1856	0.497	0.0117	0.0801	0.8841	0.3646	0.3341	0.2751	0.0745	0.1507	0.6213	0.0516	0.1848	0.7802	-0.0259	0.1309	0.8431	0.0565	0.1209	0.6399	0.1766	0.1604	0.2709	0.0487	0.1446	0.7363	0.1423	0.1171	0.2245	0.0433	0.139	0.7555	0.176	0.1455	0.2263	-0.3544	0.4613	0.4424	-0.3712	0.6423
639	28	upper face (IV)	0.1784	0.0977	0.0679	-0.0561	0.1042	0.5903	-2.731	3.3726	0.4181	0.0019	0.0861	0.9823	-0.0476	0.3629	0.8957	-0.2302	0.1896	0.2246	0.2673	0.2535	0.2917	0.002	0.1556	0.9896	0.0749	0.1469	0.6102	0.2382	0.1701	0.1613	-0.0627	0.1685	0.7096	0.0575	0.1604	0.72	0.3506	0.178	0.0489	0.1544	0.2113	0.4649	-0.9389	0.6358	0.1397	-0.0251	0.8043
640	28	upper face (IV)	-0.0329	0.0993	0.7403	0.1376	0.1259	0.2745	-0.0505	0.8995	0.9552	0.0478	0.0995	0.6307	-0.578	0.4685	0.2173	0.4204	0.2135	0.0489	0.1169	0.2519	0.6426	0.2323	0.1588	0.1437	-0.0904	0.1387	0.5148	-0.0843	0.1851	0.6488	0.3427	0.2086	0.1003	-0.0171	0.1451	0.9065	-0.0179	0.1651	0.9136	-0.2238	0.2089	0.2841	0.182	0.526	0.7293	0.8456	1.1132
641	28	upper face (IV)	0.0354	0.0892	0.6915	-0.0233	0.1003	0.8161	1.4556	1.8786	0.4384	0.0776	0.0891	0.3841	-0.4424	0.3464	0.2015	0.0619	0.1488	0.6774	-0.2896	0.2173	0.1825	-0.3694	0.1503	0.014	-0.2181	0.1219	0.0737	-0.4937	0.2032	0.0151	-0.2609	0.1514	0.0849	-0.037	0.1279	0.7724	-0.0335	0.1547	0.8287	-0.3328	0.2195	0.1295	0.587	0.4541	0.1961	0.8146	0.9734
642	28	upper face (IV)
643	28	upper face (IV)	-0.0509	0.0643	0.4287	-0.0976	0.0888	0.2716	-0.3147	0.6752	0.6412	-0.0273	0.0677	0.6872	0.3684	0.2899	0.2038	-0.0003	0.1244	0.9978	0.1484	0.1866	0.4263	0.275	0.1195	0.0214	0.194	0.1108	0.0801	0.4048	0.1576	0.0102	0.1167	0.1289	0.3654	0.106	0.1099	0.3347	0.1752	0.1285	0.1727	0.2253	0.1689	0.1824	-1.1609	0.619	0.0607	0.1374	0.535
644	28	upper face (IV)	0.0169	0.294	0.9542	-0.1526	0.4077	0.7083	-0.2237	2.0452	0.9129	-0.0319	0.281	0.9095	0.8047	1.7002	0.636																												-0.5739	1.4079	0.6836	-1.3916	2.8648
645	28	upper face (IV)	-0.1164	0.0641	0.0693	0.0318	0.096	0.7404	-0.7483	1.0811	0.4888	-0.0434	0.0667	0.5151	0.2136	0.2601	0.4115	0.059	0.1231	0.6318	-0.0274	0.168	0.8705	-0.0021	0.1084	0.9846	0.0267	0.1001	0.7894	-0.0405	0.1177	0.7309	0.121	0.1313	0.3566	-0.0147	0.1005	0.8841	0.0056	0.1083	0.9589	0.0098	0.1354	0.9424	0.0484	0.3495	0.8898	0.2206	0.5682
646	28	upper face (IV)	-0.0169	0.1	0.866	0.1965	0.103	0.0565	0.0494	0.6777	0.9419	-0.0117	0.1108	0.9156	-0.5278	0.4112	0.1993	0.1566	0.1656	0.3442	-0.314	0.2073	0.1299	0.0694	0.1444	0.6311	-0.0135	0.1212	0.9113	-0.1278	0.2449	0.6018	0.2246	0.1441	0.1191	-0.0027	0.1451	0.9854	0.0785	0.1522	0.606	-0.2529	0.1965	0.1981	0.2781	0.4579	0.5436	-0.1584	0.6229
647	28	upper face (IV)	0.0758	0.0888	0.3934	0.2379	0.1344	0.0767	-0.31	0.8967	0.7296	-0.1396	0.0996	0.1613	0.1653	0.4753	0.728	0.1286	0.1805	0.4762	-0.1944	0.24	0.4179	-0.3277	0.1798	0.0684	-0.0862	0.1391	0.5353	-0.0689	0.1866	0.7119	-0.1115	0.1611	0.4891	0.0186	0.1537	0.9038	-0.2016	0.1738	0.2461	0.0413	0.2143	0.8471	0.7707	0.6325	0.2231	-0.3314	0.7209
648	28	upper face (IV)	-0.1656	0.1128	0.1421	0.0761	0.1457	0.6014	-0.1035	1.0036	0.9178	-0.1277	0.1241	0.3034	-0.1774	0.438	0.6854	0.2523	0.1948	0.1952	-0.1327	0.2575	0.6063	0.0669	0.1682	0.6907	-0.0346	0.1638	0.8329	0.2323	0.2088	0.266	0.091	0.1795	0.6124	0.3403	0.207	0.1001	0.2889	0.2312	0.2114	-0.1295	0.2114	0.5401	-0.122	0.5614	0.828	0.6893	1.0209
649	28	upper face (IV)	0.0636	0.1189	0.5927	-0.3119	0.2607	0.2314	-1.2475	2.1364	0.5593	-0.0431	0.1283	0.7371	-0.0339	0.5141	0.9474	-0.4784	0.5038	0.3424	-0.1708	0.4156	0.6812	0.0323	0.2406	0.8932	0.1504	0.2781	0.5886	0.4283	0.4955	0.3874	-0.2102	0.3603	0.5596	-0.0158	0.2255	0.9442	0.2791	0.3223	0.3864	0.1113	0.358	0.7558	-0.4877	0.7663	0.5245	-0.6883	1.3566
650	28	upper face (IV)	-0.0221	0.0799	0.7824	0.0182	0.1071	0.8647	1.5601	1.984	0.4317	0.0401	0.0816	0.623	-0.0015	0.3752	0.9968	0.0551	0.17	0.746	0.0103	0.21	0.9608	0.0668	0.1312	0.6108	0.0371	0.1292	0.774	-0.0442	0.171	0.7958	0.0727	0.1679	0.6652	0.0494	0.1315	0.7068	-0.4454	0.1749	0.0109	0.0332	0.1927	0.8634	0.2173	0.4885	0.6565	0.6364	0.9168
651	28	upper face (IV)
652	28	upper face (IV)	0.1436	0.1083	0.1849	0.1886	0.1382	0.1724	-0.3403	0.9616	0.7234	-0.051	0.1108	0.6457	-0.7368	0.5312	0.1654	-0.0555	0.1945	0.7753	-0.1561	0.2612	0.5501	-0.087	0.1754	0.6201	-0.0522	0.1597	0.7438	0.0973	0.2209	0.6597	0.0904	0.1898	0.6337	0.012	0.1634	0.9416	-0.061	0.1889	0.7467	0.0388	0.2285	0.8652	0.6426	0.6384	0.3142	-0.5353	0.9316
653	29	upper face (IV)	-0.1569	0.1693	0.354	0.0741	0.1783	0.6776	-1.0867	1.7252	0.5288	-0.0015	0.1423	0.9913	0.1869	0.5603	0.7387	0.3976	0.3989	0.3189	0.2778	0.4411	0.5289	0.4086	0.3822	0.2851	0.2041	0.2261	0.3667	0.2214	0.3268	0.4981	0.1818	0.2719	0.5037	0.2306	0.2791	0.4088	0.488	0.3864	0.2066	0.2856	0.3391	0.3998	-1.3818	1.2988	0.2874	-0.9596	1.5351
654	29	upper face (IV)	-0.0273	0.0626	0.6632	-0.1273	0.0887	0.1514	-0.3152	0.6638	0.6349	-0.0939	0.0664	0.1574	-0.2489	0.2564	0.3317	0.0703	0.1048	0.5022	0.1716	0.1544	0.2665	-0.1484	0.109	0.1734	-0.0007	0.0931	0.9937	-0.1815	0.132	0.1692	0.0328	0.1063	0.7577	-0.1607	0.1018	0.1144	-0.175	0.1069	0.1017	-0.0119	0.1381	0.9316	0.5338	0.3917	0.1729	0.3538	0.5702
655	29	upper face (IV)	-0.1445	0.0692	0.0369	0.1156	0.0892	0.1951	0.3499	0.7786	0.6531	-0.0918	0.0679	0.1762	0.0732	0.2975	0.8058	0.0393	0.1305	0.7631	0.2283	0.1973	0.2472	0.1043	0.1205	0.3869	-0.007	0.1178	0.9524	0.1181	0.1504	0.4325	-0.0218	0.1299	0.8665	0.0598	0.1227	0.6263	0.0201	0.1231	0.8706	0.118	0.1653	0.4754	-0.4058	0.4044	0.3156	-0.1397	0.5539
656	29	upper face (IV)	-0.1281	0.0818	0.1173	-0.1517	0.1176	0.1972	0.2162	0.7414	0.7706	-0.0607	0.0761	0.4252	-0.29	0.3653	0.4272	0.0996	0.1684	0.5543	-0.0577	0.2072	0.7807	-0.1391	0.1433	0.3316	0.102	0.1358	0.4527	0.0548	0.1455	0.7065	-0.0021	0.1502	0.9887	0.0317	0.1228	0.7964	0.0974	0.1472	0.5082	-0.2214	0.1764	0.2096	0.5118	0.4808	0.2871	0.975	0.9538
657	29	upper face (IV)	0.019	0.0582	0.7441	0.0685	0.0748	0.3595	0.2627	0.5992	0.6611	0.008	0.0605	0.8952	0.3652	0.2529	0.1486	-0.1675	0.111	0.1314	-0.0388	0.145	0.7891	-0.0485	0.1035	0.6396	0.0387	0.0901	0.6676	0.1238	0.1149	0.2812	-0.0469	0.1063	0.6591	0.0093	0.0914	0.919	0.3537	0.1211	0.0035	0.0913	0.1408	0.5165	-0.3089	0.3745	0.4095	-0.4984	0.7033
658	29	upper face (IV)	-0.1077	0.0849	0.2047	-0.1616	0.1151	0.1602	-0.3857	0.9175	0.6742	-0.0936	0.0878	0.286	0.3425	0.3818	0.3697	0.0226	0.1577	0.886	0.0934	0.217	0.667	-0.2807	0.1423	0.0486	0.2041	0.1335	0.1263	0.0303	0.1472	0.8371	0.0322	0.155	0.8356	0.0655	0.1277	0.6083	0.0327	0.1533	0.8314	-0.0486	0.1753	0.7817	0.8258	0.5992	0.1682	-0.5858	0.8977
659	29	upper face (IV)	-0.1161	0.0671	0.0835	-0.0502	0.0788	0.5245	-0.1366	0.5955	0.8186	-0.0963	0.0718	0.1797	0.1453	0.2682	0.588	0.1732	0.1164	0.1368	0.1024	0.1834	0.5767	-0.1218	0.1033	0.2385	0.0764	0.1009	0.4489	-0.0297	0.1135	0.7934	0.0014	0.1197	0.9908	0.0512	0.0926	0.5804	-0.0649	0.1142	0.5697	-0.0822	0.1382	0.5522	0.3219	0.3768	0.3929	-0.5249	0.7102
660	29	upper face (IV)	0.036	0.0688	0.6003	0.0287	0.0849	0.7353	0.4808	0.8492	0.5713	0.0078	0.0706	0.9115	-0.3881	0.3055	0.204	0.1643	0.1372	0.2309	-0.0295	0.1696	0.8621	-0.0594	0.1239	0.6317	0.0894	0.1108	0.4201	0.1841	0.139	0.1853	-0.0228	0.1306	0.8616	0.1028	0.1127	0.3614	0.0248	0.137	0.8566	-0.0478	0.1568	0.7604	-0.0196	0.3517	0.9555	0.0527	0.585
661	29	upper face (IV)	0.0231	0.0669	0.7305	-0.017	0.0862	0.8438	0.0017	0.6046	0.9977	-0.0384	0.0712	0.5892	-0.0605	0.2718	0.8239	0.1339	0.1306	0.3053	0.0907	0.1723	0.5985	-0.0628	0.1085	0.5628	-0.1352	0.0954	0.1565	-0.1625	0.1376	0.2377	-0.1172	0.1243	0.346	-0.0453	0.107	0.6724	0.0743	0.1155	0.5198	0.0735	0.1559	0.6375	-0.1434	0.3644	0.694	0.0183	0.5801
662	29	upper face (IV)	0.0501	0.1025	0.6251	0.2417	0.1616	0.1348	0.0564	0.9625	0.9532	0.0333	0.0996	0.7382	0.2142	0.4738	0.6513	0.2999	0.2017	0.1371	0.2451	0.2658	0.3566	-0.096	0.1636	0.5573	-0.0833	0.1686	0.6214	-0.1389	0.2062	0.5005	-0.0915	0.1834	0.6177	0.1436	0.1718	0.4033	0.4748	0.2372	0.0453	-0.1443	0.2135	0.499	0.2256	0.5246	0.6672	-0.4445	0.9484
663	29	upper face (IV)
664	29	upper face (IV)	-0.1911	0.075	0.0108	-0.0885	0.0989	0.3705	0.2834	0.648	0.6619	-0.1056	0.0723	0.1442	-0.1144	0.3126	0.7145	0.3794	0.15	0.0114	0.2648	0.1688	0.1168	0.0426	0.1118	0.703	0.218	0.113	0.0538	0.111	0.1337	0.4064	-0.0154	0.1164	0.8948	0.1216	0.1099	0.2684	-0.0428	0.1192	0.7195	-0.2972	0.1507	0.0485	0.437	0.4369	0.3172	0.1504	0.5376
665	29	upper face (IV)	0.0784	0.0765	0.3053	0.0262	0.1034	0.8001	-1.055	1.3944	0.4493	0.1005	0.0812	0.216	0.2286	0.3515	0.5154	0.2022	0.1543	0.1898	0.3256	0.2028	0.1085	0.0869	0.1361	0.5232	0.0259	0.1203	0.8293	-0.0761	0.1711	0.6566	0.0793	0.1574	0.6145	-0.0125	0.1287	0.9226	0.4832	0.1812	0.0077	0.298	0.1805	0.0987	0.0535	0.4648	0.9084	-0.2969	0.7084
666	29	upper face (IV)
667	29	upper face (IV)	-0.0914	0.0787	0.2451	0.0526	0.0976	0.5902	0.1608	0.7614	0.8328	-0.0897	0.0866	0.3001	-0.2567	0.2915	0.3785	0.0977	0.1464	0.5047	0.0557	0.1862	0.7649	-0.0142	0.1221	0.9072	-0.1546	0.1164	0.1842	-0.0913	0.1683	0.5874	0.0568	0.1399	0.6847	-0.0955	0.1286	0.4579	-0.159	0.1445	0.2712	0.0421	0.1852	0.8203	-0.4336	0.4276	0.3106	0.2118	0.6313
668	29	upper face (IV)	0.0893	0.0735	0.2243	0.0446	0.0959	0.6418	-0.2731	0.6539	0.6762	0.0666	0.0716	0.3526	0.1042	0.2772	0.707	-0.3488	0.1391	0.0122	-0.1438	0.1537	0.3493	-0.0272	0.1206	0.8214	-0.1979	0.1091	0.0697	-0.0645	0.1434	0.6529	0.23	0.1262	0.0684	-0.0699	0.1179	0.5532	-0.1501	0.1246	0.2285	-0.037	0.1587	0.8158	0.3248	0.4218	0.4413	-0.1271	0.5507
669	29	upper face (IV)	0.0506	0.1146	0.6585	0.0847	0.1296	0.5133	0.1729	0.9459	0.855	0.0253	0.1133	0.8236	0.0151	0.4122	0.9707	-0.1233	0.2014	0.5404	-0.1226	0.254	0.6293	-0.2519	0.1794	0.1603	-0.1962	0.1718	0.2534	-0.115	0.2068	0.578	-0.0009	0.1724	0.996	-0.2192	0.1784	0.2191	-0.1582	0.1973	0.4226	0.1883	0.2147	0.3805	0.0523	0.6071	0.9313	0.4102	0.9359
670	29	upper face (IV)	-0.1559	0.1325	0.2395	-0.2246	0.1815	0.2158	-0.4337	1.1207	0.6988	-0.089	0.1119	0.4263	-0.1957	0.4887	0.6889	0.0221	0.1837	0.9042	0.108	0.2902	0.7097	-0.0315	0.1843	0.8643	-0.0388	0.157	0.8048	-0.1652	0.2561	0.5189	0.2867	0.2353	0.2229	-0.1535	0.1941	0.4291	-0.5346	0.2755	0.0523	-0.2343	0.2255	0.2989	0.9496	0.8832	0.2823	0.7742	1.2411
671	29	upper face (IV)	0.0345	0.0706	0.6248	-0.0272	0.0955	0.7757	0.7436	1.0071	0.4603	0.0804	0.0738	0.2764	0.1075	0.3101	0.7289	-0.2288	0.1347	0.0895	-0.2741	0.1584	0.0834	0.0374	0.1136	0.7417	0.0752	0.1064	0.4796	0.2581	0.1369	0.0593	0.0648	0.1246	0.6032	0.0251	0.1133	0.8247	0.0083	0.1284	0.9482	-0.1173	0.1572	0.4553	-0.011	0.3892	0.9774	-0.0035	0.6202
672	30	upper face (IV)	0.0261	0.1294	0.8403	-0.0097	0.1563	0.9506	0.2588	1.1291	0.8187	0.0195	0.1323	0.8827	0.2611	0.5202	0.6157	-0.2366	0.283	0.4031	-0.3887	0.3515	0.2687	0.1384	0.2219	0.5329	-0.1511	0.2347	0.5197	-0.1524	0.2941	0.6042	0.0898	0.2204	0.6838	0.0401	0.2198	0.8552	-0.0644	0.2604	0.8047	0.1128	0.3167	0.7216	-0.2584	0.7074	0.7149	0.0598	0.9355
673	30	upper face (IV)	-0.0174	0.1097	0.8743	0.05	0.1122	0.6557	-0.1488	0.7771	0.8481	-0.0458	0.1122	0.6832	0.4795	0.3734	0.1991	-0.0005	0.1558	0.9974	-0.022	0.1886	0.9072	0.2067	0.1444	0.1525	0.0148	0.1335	0.9115	0.2957	0.1839	0.1077	0.1725	0.1388	0.2139	0.0822	0.1497	0.5828	0.4448	0.186	0.0168	0.1792	0.2257	0.4272	-0.4168	0.4813	0.3866	-0.8966	0.9512
674	30	upper face (IV)	-0.0555	0.2752	0.8402	0.0312	0.2255	0.8899	0.4095	1.7751	0.8175	-0.1186	0.2412	0.6231	0.418	1.1022	0.7045	-0.1481	0.3333	0.6568	-0.0788	0.3681	0.8304	0.362	0.3922	0.3559	0.0003	0.2404	0.9991	0.4258	0.427	0.3187	0.2705	0.4168	0.5165	0.2177	0.4358	0.6174	0.409	0.809	0.6132	0.4165	1.0557	0.6932	-0.355	1.0168	0.727	-0.9881	1.7571
675	30	upper face (IV)	0.3975	0.456	0.3834	0.0467	0.258	0.8562	-0.0844	1.0142	0.9337	0.3209	0.2985	0.2824	-0.384	0.9492	0.6858	0.0561	0.2213	0.8	0.3548	0.6156	0.5644	-0.1339	0.2129	0.5294	0.095	0.9476	0.9201	0.0248	0.895	0.9779	-0.1937	0.4504	0.6671	0.2177	1.1595	0.8511	-0.2	0.6007	0.7392	-0.0805	0.8383	0.9235	0.4392	0.8386	0.6005	0.8766	1.464
676	30	upper face (IV)	0.0614	0.0655	0.3488	-0.0637	0.084	0.4484	0.0636	0.6114	0.9172	0.0701	0.0643	0.2756	0.0101	0.276	0.9709	-0.1549	0.1147	0.1765	-0.1388	0.1584	0.3811	0.1214	0.1085	0.2634	-0.0264	0.0892	0.7674	-0.1218	0.1244	0.3275	0.1137	0.1162	0.3279	-0.013	0.0935	0.8894	0.1052	0.1116	0.3455	0.1182	0.1472	0.4221	0.1901	0.3548	0.5922	0.3083	0.4975
677	30	upper face (IV)	-0.0547	0.0668	0.4123	0.1834	0.0828	0.0268	0.1047	0.557	0.8509	-0.0544	0.0684	0.4264	0.3416	0.2605	0.1897	-0.0337	0.1142	0.7676	-0.0288	0.1361	0.8323	0.0729	0.0987	0.4604	-0.0476	0.0898	0.5958	-0.0046	0.1353	0.9728	0.1137	0.1114	0.3074	0.004	0.0959	0.9668	-0.069	0.0979	0.4805	-0.116	0.1572	0.4604	0.233	0.3276	0.4769	-0.0439	0.5169
678	30	upper face (IV)	0.1106	0.0836	0.1859	-0.0807	0.1068	0.4498	-0.8231	1.1251	0.4644	0.0353	0.0836	0.6733	-0.6356	0.4577	0.1649	-0.1477	0.1614	0.3602	0.1319	0.2186	0.5462	0.0152	0.1324	0.9084	0.0199	0.1324	0.8806	-0.2704	0.1704	0.1125	-0.1826	0.1508	0.226	-0.0958	0.1306	0.463	-0.0178	0.1412	0.8996	-0.0218	0.2069	0.9161	0.3295	0.4179	0.4304	0.8581	0.9618
679	30	upper face (IV)	0.1287	0.0563	0.0224	-0.0078	0.0662	0.9059	0.7621	0.9525	0.4237	0.0891	0.0633	0.1591	-0.7172	0.2693	0.0077	0.0525	0.1034	0.6118	0.2229	0.1143	0.0511	0.0642	0.0966	0.5066	-0.0228	0.0814	0.7795	-0.0851	0.124	0.4928	-0.1078	0.0948	0.2552	-0.0028	0.0819	0.9723	-0.1286	0.0967	0.1835	0.2525	0.1067	0.018	0.0501	0.2899	0.8628	-0.4107	0.5569
680	30	upper face (IV)	-0.1154	0.0788	0.1428	0.1137	0.097	0.241	0.6042	1.0607	0.569	-0.0338	0.0782	0.6653	-0.0732	0.2947	0.8038	-0.173	0.142	0.223	-0.2503	0.1889	0.1851	0.0192	0.125	0.8778	-0.1005	0.1219	0.4093	-0.0257	0.1655	0.8765	0.1342	0.146	0.3582	-0.2331	0.1257	0.0637	0.0887	0.143	0.5353	0.0477	0.1617	0.7677	-0.3278	0.4287	0.4445	-0.5601	0.7637
681	30	upper face (IV)	-0.0496	0.053	0.3494	-0.0289	0.0754	0.7018	-0.3346	0.6608	0.6126	0.0011	0.0554	0.9843	-0.0042	0.2137	0.9843	-0.1146	0.1042	0.2712	-0.1974	0.138	0.1527	-0.0054	0.0892	0.952	0.0849	0.0885	0.3372	0.1315	0.1219	0.2807	0.0801	0.1128	0.4774	-0.11	0.1002	0.2722	0.1698	0.1065	0.1109	0.1601	0.1319	0.2249	-0.0157	0.32	0.9609	-0.1176	0.4763
682	30	upper face (IV)	0.0584	0.0668	0.3819	0.0012	0.1004	0.9905	-0.5848	0.871	0.502	0.0343	0.068	0.614	-0.1981	0.2814	0.4816	0.1691	0.1268	0.1822	0.0444	0.1566	0.7768	0.0164	0.1187	0.8903	0.0223	0.1113	0.8408	0.0523	0.13	0.6875	0.1404	0.1356	0.3006	0.1546	0.1056	0.1431	0.0885	0.1289	0.4923	0.1323	0.1481	0.3716	0.1457	0.3814	0.7024	-0.7607	0.8941
683	30	upper face (IV)	-0.0932	0.0585	0.1115	0.1912	0.0753	0.0111	-0.6562	0.9864	0.5059	-0.0647	0.063	0.3041	0.2204	0.2339	0.3462	0.0334	0.1054	0.7513	0.0168	0.1456	0.9083	0.0787	0.087	0.366	0.0065	0.0853	0.9394	0.1633	0.1135	0.1502	0.1183	0.1036	0.2538	-0.1183	0.0886	0.1819	0.2763	0.1072	0.01	0.1752	0.1303	0.1789	-0.1818	0.3376	0.5902	-0.3396	0.5479
684	30	upper face (IV)	-0.0398	0.0524	0.4468	0.0155	0.0757	0.8377	0.0603	0.5666	0.9152	-0.1058	0.0576	0.0663	-0.3973	0.2445	0.1042	0.1711	0.1227	0.1631	0.1824	0.1522	0.2309	-0.0746	0.0922	0.4186	0.0208	0.0935	0.8237	-0.0307	0.1169	0.7929	0.0495	0.1078	0.6463	0.0322	0.0939	0.732	0.0412	0.0986	0.6757	0.0338	0.1189	0.7762	-0.0355	0.3352	0.9156	0.1713	0.4466
685	30	upper face (IV)	0.1198	0.0762	0.1159	-0.0967	0.0858	0.2595	-0.4329	0.8069	0.5916	0.0761	0.0836	0.3622	0.0612	0.2799	0.827	-0.1074	0.1234	0.3843	0.1522	0.1667	0.3612	-0.1249	0.1133	0.2702	0.0509	0.1057	0.6301	0.0627	0.1656	0.7048	-0.0208	0.1249	0.8675	0.1424	0.1161	0.22	-0.0613	0.1116	0.5826	0.1082	0.1539	0.4821	0.1108	0.3862	0.7743	0.2044	0.6322
686	30	upper face (IV)	-0.0134	0.083	0.8715	0.3072	0.1564	0.0495	0.7531	1.1664	0.5185	0.0301	0.0907	0.7401	0.0417	0.4086	0.9187	-0.0548	0.1644	0.739	0.1269	0.1973	0.5202	0.1671	0.1472	0.2564	-0.2831	0.1679	0.0919	0.1009	0.1812	0.5777	0.1257	0.1464	0.3907	-0.1569	0.1368	0.2515	0.1986	0.163	0.2231	0.2819	0.1946	0.1474	0.1702	0.4722	0.7185	-1.0876	1.1256
687	30	upper face (IV)	-0.088	0.0687	0.2001	-0.1667	0.0919	0.0698	0.3757	0.7743	0.6275	-0.0295	0.064	0.6443	0.0851	0.28	0.7611	0.1701	0.1247	0.1725	-0.0874	0.1484	0.5561	0.0244	0.0981	0.8034	0.144	0.0895	0.1074	-0.0103	0.1094	0.9248	0.0328	0.1152	0.7757	0.0764	0.0925	0.4088	-0.0576	0.1081	0.594	-0.135	0.1366	0.3229	-0.0763	0.3674	0.8356	0.3326	0.62
688	30	upper face (IV)	-0.0385	0.0676	0.5689	0.0462	0.092	0.6156	0.0833	0.5625	0.8822	-0.0151	0.0683	0.8257	0.419	0.3	0.1625	-0.1771	0.1255	0.1582	-0.3287	0.1658	0.0475	-0.1293	0.1115	0.246	-0.224	0.1046	0.0322	-0.0642	0.14	0.6462	-0.1101	0.1246	0.3766	-0.1614	0.0999	0.1064	0.1237	0.1145	0.28	-0.0986	0.1576	0.5317	0.3556	0.3846	0.3553	-0.0269	0.4951
689	30	upper face (IV)	0.1128	0.0733	0.1239	0.0272	0.0904	0.763	0.3092	0.6822	0.6504	0.104	0.0777	0.1806	-0.4458	0.2889	0.1228	0.1198	0.1209	0.3217	0.3777	0.159	0.0175	0.0838	0.1185	0.4793	0.1605	0.102	0.1156	0.0062	0.1518	0.9675	-0.0298	0.1167	0.7986	0.058	0.095	0.5413	-0.1235	0.1153	0.284	0.1742	0.1366	0.2022	0.3056	0.3789	0.42	0.3608	0.5829
690	30	upper face (IV)	0.1503	0.0759	0.0477	0.038	0.0919	0.6791	0.1942	0.6942	0.7797	0.1393	0.0761	0.0671	-0.2505	0.3018	0.4066	0.0188	0.1285	0.8839	0.2307	0.1833	0.2081	0.0566	0.1088	0.6028	0.0043	0.1088	0.9688	-0.2153	0.1382	0.1192	-0.1862	0.135	0.1678	-0.102	0.1044	0.3285	-0.125	0.1282	0.3296	0.0379	0.1368	0.7815	0.4026	0.4201	0.3379	0.1606	0.569
691	30	upper face (IV)	0.0399	0.0612	0.5145	0.162	0.0897	0.071	0.6795	0.9177	0.459	0.0315	0.0622	0.613	0.2597	0.3223	0.4202	-0.0398	0.1288	0.7572	0.1976	0.165	0.2312	0.0051	0.1015	0.9602	-0.1936	0.0979	0.0481	-0.065	0.1213	0.5922	-0.1565	0.1232	0.2039	-0.057	0.0933	0.5412	-0.0083	0.1106	0.9401	0.157	0.1348	0.2442	0.3516	0.3546	0.3214	-0.3081	0.5828
692	30	upper face (IV)	0.111	0.0452	0.0139	0.0021	0.0644	0.9745	0.1791	0.5196	0.7304	0.037	0.0476	0.4371	-0.3704	0.2293	0.1063	-0.0544	0.0973	0.5762	-0.0598	0.1286	0.6419	0.0592	0.0854	0.488	0.0209	0.0849	0.8058	-0.1641	0.105	0.118	-0.1173	0.0907	0.1961	-0.1258	0.0885	0.1551	-0.1074	0.1045	0.3037	-0.1439	0.1174	0.2201	-0.1539	0.2576	0.5503	0.2092	0.4456
693	30	upper face (IV)	0.009	0.0558	0.8714	0.1254	0.0821	0.1267	-0.3895	0.7872	0.6207	0.0583	0.0568	0.3049	0.2726	0.2579	0.2905	0.0065	0.1066	0.9516	-0.0579	0.1563	0.7112	0.0944	0.1089	0.3857	-0.051	0.0944	0.5887	0.077	0.1196	0.5193	0.0388	0.1112	0.7273	-0.1386	0.0917	0.1306	0.1177	0.1092	0.2812	0.2965	0.1447	0.0404	0.2531	0.3768	0.5019	0.0233	0.4767
694	30	upper face (IV)
695	30	upper face (IV)	-0.0777	0.0722	0.2816	-0.0517	0.0937	0.581	0.6516	0.9933	0.5119	-0.012	0.0743	0.8713	-0.3774	0.34	0.2669	-0.0273	0.1406	0.8459	-0.0714	0.2069	0.7299	-0.0659	0.1241	0.5952	-0.1995	0.1168	0.0877	-0.0144	0.1526	0.9249	-0.1708	0.1422	0.2298	-0.1194	0.123	0.3317	0.16	0.1483	0.2804	0.1355	0.1734	0.4346	-0.1879	0.4192	0.654	-0.388	0.7336
696	30	upper face (IV)	-0.0074	0.0684	0.9138	-0.0257	0.0969	0.7906	0.063	0.6788	0.926	0.0799	0.0742	0.2816	0.0271	0.3194	0.9322	0.1186	0.1489	0.4258	0.1634	0.1689	0.3333	0.0522	0.1121	0.6411	0.4056	0.1363	0.0029	0.2561	0.1582	0.1054	0.0364	0.1436	0.8001	0.0463	0.1247	0.7108	-0.1165	0.124	0.3475	0.1693	0.1769	0.3387	-0.3525	0.4365	0.4194	0.1569	0.5657
697	30	upper face (IV)	0.0429	0.0649	0.5093	-0.1025	0.0937	0.2745	0.2933	0.7012	0.6758	0.0553	0.0639	0.3865	0.1162	0.283	0.6815	-0.2437	0.1366	0.0743	-0.1051	0.1764	0.5512	0.0219	0.105	0.835	-0.0959	0.1039	0.356	-0.0889	0.1241	0.4741	-0.1473	0.1239	0.2345	-0.0129	0.1146	0.91	0.1007	0.1205	0.4032	0.1496	0.1683	0.3739	0.1891	0.3749	0.614	0.1853	0.6208
698	30	upper face (IV)	-0.0844	0.0822	0.3043	0.0722	0.0989	0.4654	0.7741	1.09	0.4776	-0.0884	0.0883	0.3166	0.0739	0.316	0.8151	-0.0674	0.1341	0.6154	-0.0266	0.1613	0.8688	0.0184	0.1273	0.8849	0.0729	0.1135	0.5207	0.2338	0.1655	0.1578	0.0922	0.1366	0.4994	0.0811	0.1263	0.5206	0.157	0.1328	0.2372	-0.1644	0.1817	0.3657	0.3191	0.4246	0.4523	0.1409	0.6396
699	30	upper face (IV)	-0.172	0.0638	0.007	-0.0488	0.0839	0.5605	-0.0812	0.5831	0.8892	-0.1586	0.0679	0.0196	0.2059	0.2486	0.4076	0.0498	0.1134	0.6606	0.054	0.1434	0.7066	0.0093	0.1023	0.9273	-0.0446	0.0894	0.618	0.0536	0.1359	0.6934	-0.0929	0.1079	0.3894	-0.0954	0.0945	0.3127	0.1988	0.1105	0.0721	-0.0466	0.1433	0.7451	-0.063	0.3214	0.8447	0.1755	0.5041
700	30	upper face (IV)	0.0126	0.0671	0.8516	0.0131	0.0919	0.8869	-0.6734	0.9805	0.4922	0.0821	0.0657	0.2115	-0.123	0.2978	0.6797	-0.0372	0.1185	0.7539	0.1337	0.1611	0.4065	0.0934	0.0998	0.3496	0.1324	0.1105	0.231	0.3274	0.1375	0.0172	0.0468	0.1142	0.682	0.183	0.1006	0.069	0.2247	0.1385	0.1047	0.3179	0.1606	0.0478	-0.1035	0.357	0.772	-1.3429	1.2823
701	30	upper face (IV)	-0.0672	0.0707	0.3415	0.005	0.091	0.9564	0.3386	0.8541	0.6918	-0.072	0.0709	0.3093	-0.2324	0.3208	0.4688	0.0403	0.1281	0.7529	0.0232	0.15	0.8773	-0.0077	0.1165	0.9475	0.1321	0.1029	0.1996	0.0316	0.137	0.8174	0.2142	0.1381	0.121	0.0532	0.1099	0.6283	-0.1672	0.1347	0.2147	-0.0527	0.1632	0.7469	0.2151	0.4108	0.6006	-0.0194	0.5856
702	30	upper face (IV)	-0.0527	0.0865	0.5422	-0.1068	0.1054	0.3107	0.6132	1.028	0.5508	-0.0585	0.0887	0.5093	0.1553	0.3196	0.627	-0.1519	0.1543	0.3249	-0.1871	0.2098	0.3726	-0.0633	0.1305	0.6278	-0.0096	0.12	0.936	0.0393	0.1747	0.8222	0.0208	0.1366	0.8793	0.0753	0.1262	0.5506	0.0741	0.1523	0.6267	-0.4084	0.197	0.0382	0.1867	0.4481	0.677	0.743	0.844
703	30	upper face (IV)	-0.0558	0.0598	0.3505	0.0175	0.0791	0.8252	-0.5218	0.8843	0.5551	-0.0427	0.0643	0.5067	0.08	0.2533	0.7523	0.0151	0.115	0.8954	0.0109	0.1465	0.9405	0.0861	0.0904	0.3409	0.258	0.0913	0.0047	0.2112	0.1189	0.0757	0.1671	0.1092	0.1257	0.0663	0.104	0.524	-0.0621	0.1123	0.5803	0.0589	0.1374	0.668	-0.1543	0.3074	0.6157	0.243	0.523
704	30	upper face (IV)	-0.1312	0.0642	0.0409	-0.1826	0.1105	0.0983	0.3247	0.7682	0.6726	-0.0972	0.0709	0.1703	-0.1262	0.3272	0.6996	-0.0586	0.1355	0.6655	-0.1739	0.2187	0.4267	-0.0332	0.1146	0.7718	-0.0673	0.116	0.5621	0.0386	0.1431	0.7874	0.1447	0.1252	0.2477	0.1527	0.108	0.1576	0.0419	0.1264	0.7402	-0.1286	0.1619	0.4272	0.3588	0.4332	0.4076	0.2015	0.6937
705	31	upper face (IV)	0.0737	0.1211	0.5432	-0.3253	0.2319	0.1608	-1.392	2.2013	0.5272	-0.0149	0.1098	0.8922	0.0604	0.5135	0.9063	-0.1937	0.2203	0.3794	-0.087	0.2767	0.7531	0.0737	0.1839	0.6886	0.1666	0.2115	0.4309	0.4218	0.3405	0.2154	0.1667	0.2243	0.4574	0.0753	0.1886	0.6898	0.2244	0.2647	0.3967	-0.1713	0.2669	0.521	-0.7354	0.8969	0.4123	0.3548	1.047
706	31	upper face (IV)	0.1301	0.1062	0.2205	-0.1579	0.1166	0.1758	-0.4365	1.0752	0.6847	0.1409	0.1053	0.1811	-0.5395	0.4292	0.2088	-0.0918	0.1672	0.583	0.0051	0.2066	0.9803	-0.1095	0.1409	0.4369	-0.1006	0.1337	0.4515	0.0636	0.1906	0.7385	-0.1678	0.1589	0.2911	-0.1814	0.1416	0.2001	0.1704	0.1711	0.3192	-0.0804	0.1998	0.6874	0.6039	0.6416	0.3466	0.665	0.9745
707	31	upper face (IV)	0.0068	0.0551	0.9023	0.1233	0.0805	0.1256	0.5129	0.7807	0.5112	-0.0459	0.058	0.4286	-0.152	0.2688	0.5717	0.0815	0.1226	0.5063	0.1124	0.1432	0.4323	0.1112	0.0995	0.2638	-0.0825	0.0987	0.4029	-0.0321	0.114	0.7783	0.0588	0.1123	0.6008	-0.0122	0.0931	0.8959	0.1077	0.1198	0.3683	0.2181	0.1348	0.1056	0.783	0.484	0.1057	0.0188	0.5049
708	31	upper face (IV)	0.0232	0.0522	0.6563	-0.1147	0.0697	0.0995	-0.2104	0.6113	0.7308	0.0693	0.0561	0.2168	-0.1867	0.2459	0.4477	-0.2296	0.1176	0.051	0.1495	0.1554	0.3359	-0.0229	0.0992	0.8176	0.1133	0.0844	0.1795	0.1885	0.1152	0.1019	-0.0355	0.1148	0.7568	-0.0763	0.0987	0.4396	-0.0136	0.1184	0.9087	-0.0165	0.1333	0.9014	-0.06	0.3258	0.8539	0.087	0.503
709	31	upper face (IV)	-0.0568	0.0694	0.4127	0.0159	0.0921	0.8627	-0.5428	0.8844	0.5394	-0.0602	0.0751	0.4227	-0.0776	0.2564	0.7622	-0.2049	0.1222	0.0938	-0.0661	0.1674	0.6929	0.1007	0.0988	0.3081	-0.154	0.1049	0.1419	-0.1719	0.1466	0.2409	0.0146	0.1119	0.8962	-0.1847	0.1076	0.086	0.1075	0.1224	0.3798	-0.0451	0.1588	0.7765	-0.2654	0.42	0.5275	0.2725	0.6229
710	31	upper face (IV)	0.1477	0.1324	0.2647	0.2473	0.206	0.2299	-0.0809	1.2542	0.9485	0.0707	0.1227	0.5648	0.0055	0.4853	0.991	-0.1267	0.2323	0.5853	0.1573	0.2866	0.583	0.1747	0.2048	0.3936	0.248	0.2352	0.2918	0.2303	0.2497	0.3563	0.037	0.2488	0.8816	0.2384	0.2326	0.3054	0.0912	0.2177	0.675	-0.2686	0.2982	0.3678	-1.0744	1.0122	0.2885	-1.619	2.0675
711	31	upper face (IV)	0.0963	0.0649	0.1378	0.1283	0.0886	0.1476	-0.0957	0.5824	0.8695	-0.0177	0.0611	0.7715	-0.2303	0.2655	0.3856	0.1977	0.1179	0.0936	0.0565	0.166	0.7337	-0.0867	0.1102	0.4316	0.0588	0.0983	0.5494	-0.0037	0.1249	0.9764	-0.1585	0.119	0.1828	0.1782	0.0993	0.0728	-0.0819	0.1223	0.503	-0.0382	0.144	0.7907	-0.6156	0.4321	0.1543	-0.0168	0.5072
712	31	upper face (IV)	-0.0751	0.0663	0.2568	-0.0797	0.0816	0.3286	0.3181	0.7112	0.6546	-0.0335	0.07	0.632	0.2046	0.3173	0.5191	0.0763	0.1173	0.5155	0.1317	0.1575	0.4032	0.0564	0.1107	0.6106	0.1913	0.1052	0.0689	0.1167	0.1403	0.4053	0.0242	0.1243	0.8459	0.1402	0.1	0.1611	-0.1842	0.1137	0.1051	0.0424	0.149	0.776	0.0485	0.3809	0.8986	-0.2939	0.5291
713	31	upper face (IV)	-0.0844	0.0803	0.2938	0.0253	0.1028	0.8056	0.1414	0.7232	0.8449	-0.1104	0.0739	0.135	0.4929	0.3152	0.1179	0.277	0.1466	0.0589	0.0375	0.1754	0.8306	-0.0911	0.1213	0.4528	0.2732	0.1213	0.0243	0.4222	0.1635	0.0098	0.1499	0.14	0.2841	0.2436	0.1228	0.0473	-0.1719	0.1333	0.1973	0.0534	0.1723	0.7567	-0.5357	0.4883	0.2727	0.0617	0.5587
714	31	upper face (IV)	0.0286	0.0696	0.6808	0.02	0.1027	0.8455	-0.6761	1.1103	0.5426	-0.0275	0.0752	0.7148	0.0475	0.3172	0.8811	0.1031	0.1354	0.4467	-0.173	0.17	0.309	-0.1048	0.1255	0.4036	-0.0432	0.1008	0.6684	-0.1899	0.1491	0.2028	-0.1204	0.1276	0.3455	-0.0321	0.1091	0.7688	-0.1199	0.1427	0.4008	-0.1484	0.1538	0.3346	0.5373	0.4266	0.2079	0.368	0.6429
715	31	upper face (IV)	0.1219	0.0742	0.1002	0.1019	0.0853	0.2324	-0.1849	0.6915	0.7892	0.1116	0.0767	0.1456	-0.6582	0.3578	0.0658	-0.0418	0.1342	0.7556	-0.1454	0.1722	0.3985	0.0294	0.1113	0.7916	-0.1594	0.1216	0.1899	-0.1882	0.1385	0.1743	-0.1461	0.138	0.2899	-0.0784	0.1059	0.4588	-0.0178	0.128	0.8894	-0.0535	0.1584	0.7357	0.5145	0.4254	0.2266	-0.0328	0.574
716	31	upper face (IV)	0.2076	0.071	0.0035	-0.0324	0.0829	0.6957	0.4432	0.8294	0.5931	0.0531	0.089	0.5509	-0.2199	0.2585	0.3949	0.1367	0.1179	0.2464	0.2572	0.1662	0.1217	0.0169	0.1251	0.8926	0.1579	0.0926	0.0881	0.1238	0.187	0.5079	0.0841	0.1059	0.4272	0.1822	0.102	0.0742	0.1571	0.109	0.1493	0.2565	0.169	0.1292	-0.2516	0.3922	0.5213	0.8722	0.9319
717	31	upper face (IV)	-0.1058	0.0864	0.2209	-0.0266	0.0977	0.7852	0.5354	1.007	0.5949	-0.1203	0.0779	0.1225	0.8552	0.4047	0.0346	0.3697	0.1646	0.0247	-0.0593	0.2048	0.7722	0.1183	0.1288	0.3583	0.0946	0.1236	0.4441	0.0935	0.1689	0.5799	0.046	0.1398	0.742	0.0674	0.1296	0.603	-0.155	0.1391	0.2651	-0.0849	0.1731	0.6239	0.0787	0.4143	0.8494	0.0895	0.6149
718	31	upper face (IV)	-0.0137	0.0654	0.8342	-0.1222	0.0827	0.1397	-0.4128	0.8099	0.6103	-0.0823	0.0716	0.2505	0.0824	0.2739	0.7635	-0.185	0.1284	0.1498	-0.3377	0.1731	0.0511	-0.0507	0.096	0.5978	-0.2206	0.12	0.066	-0.0541	0.1304	0.6782	0.0713	0.1214	0.5569	-0.2021	0.1161	0.0817	0.0546	0.1232	0.6577	0.0782	0.135	0.5621	-0.1492	0.3547	0.674	0.4044	0.683
719	32	philtrum (I)	-0.021	0.0924	0.8203	0.2396	0.128	0.0611	-1.3637	1.736	0.4321	-0.0026	0.0831	0.9751	0.293	0.4041	0.4684	0.0927	0.1597	0.5616	-0.0934	0.2246	0.6774	0.0154	0.1294	0.9053	-0.0165	0.1368	0.9043	-0.0534	0.1707	0.7545	-0.0416	0.1531	0.7856	-0.0929	0.1375	0.4991	-0.1605	0.1457	0.2709	-0.3242	0.2146	0.1309	0.3163	0.5394	0.5576	-0.4332	0.8355
720	32	philtrum (I)	-0.0027	0.055	0.9605	-0.0743	0.0643	0.2474	-0.2708	0.6927	0.6959	-0.0225	0.0549	0.6814	0.0732	0.2382	0.7586	-0.1799	0.1035	0.0822	0.0158	0.1407	0.9104	0.032	0.0847	0.7057	0.0387	0.085	0.649	0.003	0.1041	0.977	-0.0018	0.1073	0.9867	-0.0659	0.0884	0.456	0.0577	0.1034	0.5768	0.0199	0.1271	0.8758	0.1764	0.2914	0.5449	0.3744	0.5484
721	32	philtrum (I)	0.0517	0.0787	0.5112	-0.1821	0.1181	0.1231	0.2493	0.7955	0.754	-0.0705	0.0817	0.388	0.1505	0.3076	0.6246	-0.0831	0.1343	0.5363	-0.0835	0.1956	0.6694	-0.2906	0.1386	0.036	0.1397	0.1212	0.2488	0.1059	0.154	0.4915	-0.2128	0.1405	0.1299	0.0792	0.1232	0.5202	0.2961	0.1407	0.0353	-0.0012	0.1836	0.9948	-0.1189	0.4529	0.793	0.1113	0.6112
722	32	philtrum (I)	-0.0187	0.061	0.76	0.0722	0.0726	0.3199	-0.1141	0.5587	0.8383	0.0632	0.0608	0.2982	0.0766	0.243	0.7527	-0.0512	0.0996	0.6069	0.0929	0.1424	0.5141	0.0644	0.0895	0.4718	0.0959	0.0929	0.3021	-0.0345	0.114	0.7622	0.0154	0.1045	0.8831	0.0652	0.0928	0.4822	-0.0097	0.1127	0.9314	0.0255	0.1383	0.8536	-0.4087	0.3448	0.2358	0.0598	0.457
723	32	philtrum (I)	0.0893	0.0793	0.26	-0.2293	0.1064	0.0312	0.6953	1.0428	0.5049	-0.0574	0.0808	0.4772	0.0293	0.2806	0.917	0.0144	0.1328	0.9135	-0.0353	0.1799	0.8443	-0.3155	0.1288	0.0143	0.0734	0.1157	0.526	0.1158	0.1457	0.4266	-0.1604	0.1273	0.2079	0.1805	0.1241	0.1457	0.1862	0.1378	0.1766	0.078	0.1654	0.637	-0.2442	0.4208	0.5617	-0.1503	0.5808
724	32	philtrum (I)	0.0741	0.0581	0.2024	-0.1478	0.0728	0.0422	0.2327	0.5895	0.6931	0.0257	0.0571	0.6527	-0.0845	0.2351	0.7192	-0.0509	0.099	0.6072	-0.0442	0.1367	0.7464	0.0054	0.0891	0.952	-0.1598	0.0874	0.0675	0.012	0.1108	0.9137	-0.0224	0.1043	0.8296	0.0098	0.0868	0.91	-0.0062	0.0927	0.9467	0.0102	0.1171	0.9305	-0.0687	0.326	0.833	0.2519	0.4892
725	33	philtrum (I)	0.0638	0.0787	0.4176	0.0644	0.094	0.4931	-0.1807	0.7099	0.7991	0.0917	0.0844	0.2772	-0.0916	0.3194	0.7742	-0.2492	0.1391	0.0732	-0.3254	0.1955	0.0961	-0.1318	0.1171	0.2605	-0.0859	0.1134	0.4488	-0.1507	0.1514	0.3199	-0.1375	0.1243	0.2688	-0.0314	0.1063	0.768	0.0882	0.1301	0.4979	-0.0927	0.165	0.5743	0.0875	0.3722	0.8141	-0.1904	0.6188
726	33	philtrum (I)	0.005	0.1093	0.9635	0.0665	0.125	0.5948	1.0026	1.5431	0.5158	0.1183	0.1084	0.2751	0.127	0.4342	0.7699	-0.104	0.1841	0.5722	-0.3071	0.264	0.2447	-0.0194	0.1643	0.9058	-0.0818	0.1466	0.5767	-0.065	0.2029	0.7487	-0.0155	0.1643	0.925	-0.0205	0.1504	0.8916	0.1166	0.189	0.5374	-0.0594	0.2258	0.7923	0.0949	0.4944	0.8478	0.559	0.845
727	33	philtrum (I)	0.0106	0.0548	0.8462	-0.039	0.0776	0.615	0.0587	0.5659	0.9173	0.0384	0.0582	0.5097	-0.0269	0.258	0.917	0.0218	0.1089	0.8413	0.0092	0.1511	0.9515	-0.0641	0.0898	0.4755	0.1269	0.0906	0.1611	0.0992	0.1113	0.3727	-0.0114	0.0954	0.9051	0.1079	0.0977	0.2692	0.0423	0.0951	0.6567	-0.1583	0.1382	0.2519	-0.2834	0.3248	0.3829	-0.3195	0.5933
728	33	philtrum (I)	-0.0081	0.0599	0.8918	-0.1039	0.0762	0.1724	0.7921	1.1289	0.4829	0.0481	0.0595	0.4188	-0.0334	0.2764	0.9038	0.0877	0.1225	0.4744	0.0254	0.1578	0.8724	0.0281	0.09	0.7551	0.1376	0.1028	0.1809	0.1324	0.1191	0.2663	-0.0109	0.1019	0.9146	0.1239	0.1138	0.2761	0.0028	0.1042	0.9786	-0.0158	0.1262	0.9005	-0.2624	0.3164	0.407	0.2564	0.5482
729	33	philtrum (I)	0.0993	0.0834	0.2341	0.0642	0.0961	0.5043	-0.9881	1.3581	0.4669	-0.0081	0.0669	0.9032	-0.1103	0.2897	0.7033	-0.1391	0.1296	0.2831	0.0278	0.169	0.8695	-0.1166	0.1125	0.3002	-0.0596	0.112	0.5948	-0.0953	0.1488	0.522	-0.0969	0.1266	0.4443	-0.0159	0.1063	0.8812	-0.0832	0.1364	0.5421	-0.0193	0.1481	0.8963	0.1199	0.3306	0.7169	-0.4312	0.6954
730	33	philtrum (I)	0.0054	0.1014	0.9573	-0.1945	0.1537	0.2058	0.6105	1.1391	0.592	0.0172	0.1021	0.8666	0.0594	0.4195	0.8875	0.0686	0.1683	0.6834	0.2221	0.2426	0.3599	0.0642	0.1539	0.6764	-0.0138	0.159	0.9311	0.06	0.2036	0.7681	0.0247	0.1591	0.8768	0.0559	0.1552	0.7186	0.0069	0.1811	0.9696	0.4027	0.2508	0.1084	-0.0884	0.5105	0.8625	0.7266	1.1075
731	33	philtrum (I)	-0.0051	0.0993	0.959	-0.1979	0.1533	0.1966	0.5404	1.0507	0.607	0.0266	0.0986	0.7875	0.0737	0.4098	0.8573	0.0119	0.1671	0.9433	0.135	0.2315	0.5598	0.0464	0.1506	0.7577	-0.06	0.1543	0.6975	0.0091	0.1992	0.9636	0.0104	0.1604	0.9483	0.0182	0.1532	0.9052	0.0723	0.1773	0.6832	0.4167	0.2502	0.0957	-0.0666	0.5076	0.8956	0.6631	1.0646
732	33	philtrum (I)	-0.0335	0.0884	0.7045	-0.1321	0.1228	0.2823	0.5126	0.9635	0.5947	-0.0287	0.089	0.747	0.0434	0.3569	0.9031	0.0999	0.1439	0.4878	0.1764	0.2079	0.396	0.1163	0.1356	0.391	-0.0293	0.1321	0.8245	0.0351	0.1745	0.8404	0.0472	0.1361	0.7289	-0.0093	0.1279	0.942	-0.0179	0.1531	0.907	0.3354	0.204	0.1003	0.021	0.4221	0.9604	0.616	0.9319
733	33	philtrum (I)	-0.0396	0.069	0.5657	-0.0471	0.0875	0.5906	0.6247	0.9973	0.5311	-0.0533	0.0684	0.4354	0.0006	0.2671	0.9983	0.2513	0.1259	0.0459	0.2298	0.1697	0.1757	0.1828	0.1071	0.088	0.0897	0.1005	0.3721	0.1444	0.1343	0.2822	0.0257	0.1189	0.829	-0.0143	0.1015	0.8879	-0.2002	0.1191	0.0926	0.0108	0.1439	0.9404	-0.0074	0.3491	0.9832	0.3012	0.5897
734	34	philtrum (I)	0.0786	0.0899	0.3822	-0.0595	0.098	0.5438	-0.9284	1.4382	0.5186	-0.0472	0.0914	0.6055	0.0638	0.3658	0.8615	-0.1591	0.1747	0.3625	0.0526	0.2162	0.8077	-0.0753	0.1369	0.5822	-0.05	0.1307	0.7018	-0.1679	0.1874	0.3703	-0.193	0.1569	0.2185	-0.2135	0.1361	0.1166	0.0074	0.1486	0.9605	-0.3253	0.1952	0.0956	0.1624	0.4783	0.7342	-0.4199	0.761
735	34	philtrum (I)	0.0876	0.0996	0.3789	-0.0539	0.1111	0.6278	-1.4802	2.0901	0.4788	-0.0328	0.105	0.7549	0.1325	0.3913	0.7348	-0.2376	0.1844	0.1976	0.0173	0.2344	0.9412	-0.1454	0.1526	0.3406	-0.076	0.1425	0.5936	-0.2117	0.2043	0.2999	-0.2361	0.1718	0.1693	-0.2643	0.1585	0.0954	0.0858	0.165	0.6029	-0.2612	0.2158	0.2262	-0.1213	0.4966	0.807	-0.318	0.8368
736	34	philtrum (I)	0.0618	0.0816	0.4489	-0.0873	0.0814	0.2837	-0.9354	1.349	0.488	0.0037	0.0865	0.9657	0.1711	0.2855	0.5488	-0.1981	0.1413	0.161	0.1153	0.1836	0.5301	-0.0778	0.1143	0.4962	-0.0178	0.1065	0.8671	-0.1133	0.1646	0.4912	-0.1667	0.1252	0.1831	-0.1279	0.1119	0.2531	-0.0149	0.1246	0.905	-0.2232	0.1693	0.1873	0.0618	0.3899	0.8741	-0.1773	0.5592
737	34	philtrum (I)	0.0246	0.0602	0.6832	0.102	0.0838	0.2238	0.0592	0.5269	0.9106	-0.0717	0.0654	0.2729	0.2165	0.2736	0.4287	-0.0223	0.1077	0.8357	0.0479	0.1647	0.771	-0.1882	0.0935	0.0441	-0.0877	0.0964	0.3629	-0.0556	0.136	0.6827	-0.0198	0.1169	0.8655	-0.0543	0.1061	0.6086	0.0228	0.1016	0.8228	-0.2264	0.1448	0.118	0.1754	0.304	0.5639	-0.1905	0.5072
738	34	philtrum (I)	0.1406	0.1054	0.1822	0.0644	0.1163	0.5797	-0.5444	1.1435	0.634	0.1084	0.1068	0.31	-0.2033	0.4094	0.6194	0.0343	0.1555	0.8254	-0.0945	0.2009	0.6379	-0.0029	0.143	0.9836	0.1838	0.1296	0.1562	-0.0666	0.1957	0.7336	0.0304	0.143	0.8319	0.1805	0.129	0.1617	0.2091	0.1467	0.1541	0.3482	0.1972	0.0773	-0.1725	0.4644	0.7103	-0.0491	0.7007
739	34	philtrum (I)	-0.0272	0.0849	0.749	0.0459	0.1017	0.6519	0.4389	0.932	0.6377	0.0592	0.0869	0.4956	0.1125	0.3147	0.7207	-0.0056	0.1356	0.9668	0.1045	0.1818	0.5653	-0.2839	0.1357	0.0365	-0.2256	0.1115	0.0432	-0.0721	0.1429	0.6138	-0.1679	0.1395	0.2288	-0.0453	0.1053	0.6671	0.025	0.1463	0.8645	-0.0669	0.1743	0.7013	0.0311	0.4284	0.9421	-0.258	0.7118
740	34	philtrum (I)	0.0598	0.0852	0.483	0.1231	0.0911	0.1768	0.6384	0.9949	0.5211	0.1019	0.0873	0.2432	-0.1022	0.2681	0.7032	0.0181	0.1306	0.8899	0.0563	0.1508	0.709	-0.1219	0.1092	0.2641	0.0426	0.0938	0.6494	-0.0236	0.179	0.8953	0.0378	0.1043	0.7172	0.1415	0.0955	0.1383	0.023	0.1025	0.8227	0.2409	0.1334	0.071	-0.0507	0.3366	0.8802	-0.1146	0.5348
741	34	philtrum (I)	0.0961	0.0656	0.1431	0.0713	0.0765	0.3516	0.7449	0.9862	0.4501	0.0484	0.0695	0.4863	0.0321	0.2384	0.8929	0.141	0.0969	0.1457	0.0312	0.131	0.8118	-0.1178	0.0897	0.1892	0.1093	0.0818	0.1815	-0.0162	0.1383	0.9065	-0.0473	0.0981	0.6295	0.1741	0.0884	0.0488	0.0583	0.0935	0.533	0.0678	0.1347	0.6145	0.4152	0.357	0.2449	-0.446	0.5689
742	35	philtrum (I)	0.0476	0.0681	0.4845	0.0766	0.0821	0.351	0.1302	0.6364	0.8379	0.0531	0.0699	0.4475	0.2065	0.2687	0.4421	-0.3257	0.1264	0.01	-0.2488	0.1633	0.1276	-0.2038	0.103	0.0478	-0.1465	0.0936	0.1174	-0.1038	0.1352	0.4426	-0.1698	0.1162	0.1439	-0.107	0.1002	0.2855	0.0441	0.108	0.6828	-0.1526	0.1435	0.2878	0.0817	0.3265	0.8023	-0.103	0.5775
743	35	philtrum (I)	0.024	0.0691	0.7282	0.1256	0.0841	0.1352	0.616	0.9538	0.5184	-0.0041	0.0653	0.9494	-0.0937	0.3149	0.7661	-0.1699	0.1277	0.1834	-0.0522	0.1629	0.7488	-0.1184	0.119	0.3195	-0.1282	0.1065	0.2286	-0.0175	0.1354	0.8969	-0.0509	0.1214	0.6747	-0.1706	0.1085	0.1157	-0.0797	0.1184	0.5011	-0.3324	0.1643	0.0431	0.2569	0.3824	0.5017	0.0755	0.541
744	35	philtrum (I)	0.0713	0.0805	0.3756	-0.0423	0.0948	0.655	-0.1782	0.7886	0.8212	-0.0029	0.0714	0.9681	-0.0242	0.2956	0.9347	-0.1671	0.1609	0.299	-0.1725	0.1966	0.3802	-0.1353	0.1197	0.2583	0.1253	0.1157	0.2791	-0.1409	0.1411	0.3181	-0.1967	0.1389	0.1568	-0.2174	0.1348	0.1069	-0.0178	0.12	0.8823	0.0304	0.1557	0.845	-0.0969	0.4325	0.8227	-0.0164	0.5837
745	35	philtrum (I)	-0.0668	0.0709	0.3463	0.1351	0.0913	0.139	0.0007	0.7228	0.9993	-0.0836	0.0717	0.2437	0.0716	0.2965	0.8091	-0.2432	0.1432	0.0895	-0.3247	0.1899	0.0874	-0.0563	0.1207	0.6409	-0.1301	0.1134	0.2513	-0.0805	0.1561	0.6058	-0.0258	0.1336	0.8466	-0.1366	0.1202	0.2559	0.1344	0.125	0.2823	-0.1707	0.1577	0.2789	0.3016	0.3934	0.4432	0.1787	0.6134
746	35	philtrum (I)	-0.0507	0.0798	0.5256	-0.1167	0.0972	0.2302	-0.8377	1.2122	0.4895	-0.0181	0.0771	0.8143	0.2479	0.3703	0.5032	-0.0015	0.1307	0.9907	0.0179	0.1737	0.9179	-0.0522	0.1355	0.7003	0.0322	0.1241	0.7952	-0.0485	0.1505	0.7471	-0.1166	0.1373	0.3955	0.0099	0.1152	0.9314	0.0775	0.1271	0.5422	0.259	0.2016	0.199	-0.1575	0.4193	0.7072	-0.0429	0.6452
747	36	philtrum (I)	-0.0069	0.054	0.8977	0.0288	0.066	0.6627	-0.7046	1.0038	0.4827	-0.0513	0.0552	0.3531	0.0746	0.2115	0.7242	-0.1864	0.0871	0.0323	0.0017	0.1181	0.9884	-0.0612	0.0742	0.4101	-0.0018	0.0778	0.9812	0.0354	0.0983	0.7185	-0.0642	0.0919	0.4851	0.0633	0.0765	0.4081	-0.0899	0.0869	0.301	-0.0522	0.1013	0.6064	0.0057	0.2862	0.9841	0.142	0.3786
748	36	philtrum (I)	-0.0297	0.108	0.7835	0.1108	0.1304	0.3958	0.063	0.8151	0.9384	-0.0572	0.1122	0.6106	0.3161	0.3901	0.4177	-0.2796	0.1813	0.1231	-0.1422	0.2257	0.5286	0.0484	0.1412	0.7317	-0.0218	0.1442	0.8799	0.1044	0.1944	0.5911	-0.0749	0.1626	0.645	0.0261	0.1462	0.8581	-0.1427	0.164	0.3844	-0.0856	0.1926	0.6566	-0.1711	0.4636	0.712	-0.0535	0.7614
749	36	philtrum (I)	-0.0237	0.084	0.7775	-0.0474	0.089	0.5941	0.0165	0.6375	0.9793	0.0316	0.0838	0.7063	-0.2672	0.2941	0.3636	-0.008	0.1181	0.9458	0.2213	0.18	0.2188	0.1011	0.1227	0.4102	0.0005	0.0979	0.9959	0.0149	0.1716	0.9307	0.1803	0.1278	0.1583	-0.054	0.108	0.6172	0.0015	0.1154	0.9898	0.041	0.1514	0.7864	0.1448	0.3815	0.7042	0.3105	0.6354
750	36	philtrum (I)	0.0169	0.0587	0.7731	0.1477	0.0701	0.0351	-0.4797	0.8234	0.5602	0.0145	0.0594	0.8076	-0.0396	0.2243	0.8598	-0.0562	0.1087	0.6052	0.1265	0.141	0.3697	0.0221	0.0905	0.807	0.0227	0.0914	0.8035	0.0099	0.0959	0.9176	-0.0308	0.1017	0.7623	0.0047	0.0887	0.9573	-0.1262	0.1	0.2068	-0.1056	0.1148	0.3577	0.1804	0.2888	0.5322	0.2317	0.4175
751	36	philtrum (I)	-0.0009	0.0631	0.988	0.1253	0.0857	0.1435	0.1133	0.6732	0.8663	0.019	0.064	0.7669	0.2797	0.3007	0.3523	0.1383	0.1378	0.3154	0.0529	0.167	0.7514	-0.0398	0.1163	0.7324	0.0678	0.1048	0.5176	0.1099	0.1295	0.3962	0.0886	0.1282	0.4894	0.091	0.1061	0.391	0.1064	0.1272	0.4028	0.1423	0.1536	0.3541	-0.0356	0.3885	0.9269	0.0206	0.5439
752	36	philtrum (I)	0.0197	0.0873	0.8211	0.0946	0.076	0.2132	0.551	0.7973	0.4895	0.0379	0.09	0.6736	0.0034	0.2174	0.9875	-0.0485	0.1117	0.6644	0.1691	0.1209	0.162	-0.0201	0.1018	0.8431	0.0989	0.0763	0.195	0.0431	0.2017	0.8306	0.0831	0.0852	0.3297	0.0964	0.0807	0.232	-0.074	0.0874	0.3973	0.1333	0.1446	0.3565	0.0334	0.2547	0.8958	0.1303	0.4428
753	37	philtrum (I)	-0.0332	0.0805	0.6797	-0.1219	0.1037	0.2399	-0.3265	0.8726	0.7083	0.0977	0.0808	0.2262	0.2802	0.3056	0.3591	-0.2158	0.1462	0.14	0.1778	0.1772	0.3159	-0.017	0.1201	0.8872	0.0884	0.1129	0.4332	0.0406	0.1479	0.7837	-0.1596	0.144	0.2674	0.0553	0.1157	0.6328	0.0564	0.1328	0.6708	0.061	0.1697	0.7195	-0.8027	0.5506	0.1449	1.1785	1.118
754	37	philtrum (I)	-0.0242	0.0729	0.7398	-0.0322	0.0921	0.7267	0.9824	1.2771	0.4418	0.1128	0.0756	0.1355	0.5986	0.3426	0.0806	-0.175	0.1343	0.1926	-0.0053	0.1693	0.9749	-0.0161	0.1159	0.8898	-0.1123	0.1147	0.3273	-1.5849e-06	0.1345	1	-0.2148	0.1353	0.1123	-0.1181	0.1248	0.3439	-0.0415	0.1237	0.7369	-0.0501	0.1526	0.7429	-0.7183	0.5329	0.1777	0.9724	0.9554
755	37	philtrum (I)	0.0478	0.0711	0.5016	-0.0409	0.0852	0.6316	0.9812	1.3602	0.4707	0.0022	0.0687	0.9746	-0.0626	0.253	0.8047	-0.1027	0.1143	0.3692	-0.2841	0.1635	0.0824	-0.1151	0.0999	0.249	-0.1573	0.0933	0.0919	-0.1285	0.1232	0.2973	-0.1976	0.122	0.1051	-0.1026	0.0919	0.2642	-0.0407	0.1129	0.7182	-0.1232	0.1378	0.3712	0.2882	0.3741	0.4412	-0.4128	0.6453
756	37	philtrum (I)	-0.0141	0.1983	0.9434	0.159	0.3633	0.6616	3.1585	6.2064	0.6108	-0.0077	0.1846	0.9665	0.5053	1.159	0.6628	-0.84	0.8969	0.349	-0.1627	0.4418	0.7127	0.009	0.235	0.9696	-0.3222	0.4164	0.4391	0.0491	0.3264	0.8805	-0.3479	0.5429	0.5217	-0.0639	0.2583	0.8045	-0.2949	0.474	0.5338	-0.5697	0.5575	0.3068	-0.3008	1.0611	0.7768	0.0814	1.4965
757	37	philtrum (I)	-0.0361	0.059	0.5399	0.0007	0.0796	0.9929	0.8233	1.08	0.4459	-0.0637	0.0592	0.2816	0.2959	0.2536	0.2433	-0.0988	0.1053	0.3481	-0.1494	0.1241	0.2286	-0.0807	0.0842	0.3382	-0.0846	0.0887	0.3399	0.0075	0.1056	0.9436	-0.2104	0.0978	0.0315	0.0139	0.0892	0.8764	-0.0683	0.1159	0.5555	0.0142	0.1201	0.9062	0.1046	0.3209	0.7444	0.6383	0.6593
758	37	philtrum (I)	0.0794	0.0974	0.415	0.0959	0.1135	0.3982	1.3422	1.7021	0.4304	0.0333	0.1056	0.7527	0.6881	0.4184	0.1	-0.1672	0.1729	0.3336	0.104	0.2158	0.6299	-0.1366	0.1543	0.3761	-0.0529	0.1461	0.7173	0.073	0.1924	0.7044	-0.1384	0.163	0.3957	-0.0291	0.1373	0.8322	-0.0265	0.172	0.8777	0.2569	0.2242	0.2518	0.0428	0.4755	0.9283	1.2317	1.2057
759	37	philtrum (I)	-0.0044	0.0817	0.9573	-0.0707	0.1041	0.4969	1.2362	1.8014	0.4926	0.1151	0.0991	0.2456	-0.0805	0.3217	0.8024	0.2012	0.1389	0.1476	0.169	0.1791	0.3454	-0.0091	0.1303	0.9444	0.1406	0.1249	0.2604	-0.1364	0.1623	0.4008	-0.0263	0.1512	0.862	-0.0305	0.111	0.7835	-0.0976	0.157	0.5343	0.171	0.1838	0.3522	0.7666	0.6005	0.2017	-0.0575	0.6425
760	38	philtrum (I)	0.0049	0.0678	0.9423	0.1435	0.0906	0.1133	-0.1335	0.6628	0.8404	-0.0717	0.0804	0.3726	0.065	0.3204	0.8393	-0.0411	0.1315	0.7544	-0.127	0.1907	0.5055	0.021	0.11	0.8486	-0.11	0.1197	0.358	0.0951	0.1495	0.5246	0.0673	0.1265	0.5946	-0.0661	0.1103	0.549	0.1068	0.1445	0.4597	-0.1756	0.1787	0.3259	-0.0907	0.3832	0.8128	-1.2351	1.1324
761	38	philtrum (I)	-0.0837	0.087	0.3362	0.2197	0.0983	0.0254	0.0503	0.6878	0.9417	-0.1405	0.0949	0.1387	0.0308	0.2821	0.913	-0.015	0.1325	0.9101	-0.3336	0.1783	0.0614	0.0166	0.1278	0.8967	0.0119	0.1123	0.9154	0.2359	0.183	0.1974	0.0043	0.1165	0.9707	-0.0117	0.1254	0.9255	-0.0022	0.1343	0.9867	-0.2064	0.1729	0.2326	0.0819	0.3841	0.8313	0.2184	0.5505
762	38	philtrum (I)	-0.0317	0.0592	0.5916	0.0916	0.0796	0.2499	0.6492	1.0405	0.5327	-0.0332	0.0644	0.6064	0.1863	0.2615	0.4762	-0.0094	0.0966	0.9221	-0.0178	0.1475	0.9039	-0.0162	0.0989	0.8698	-0.0558	0.0947	0.5557	-0.043	0.1059	0.6844	0.0166	0.1064	0.8763	-0.0274	0.089	0.758	-0.1311	0.1022	0.1998	-0.2583	0.1487	0.0824	-0.1857	0.3281	0.5715	-0.4265	0.6158
763	38	philtrum (I)	-0.084	0.0781	0.2827	-0.0108	0.1043	0.9177	0.983	1.4296	0.4917	-0.0163	0.0768	0.8316	0.112	0.3571	0.7538	-0.0816	0.1303	0.5312	0.1188	0.197	0.5465	0.0145	0.1136	0.8983	-0.0121	0.1201	0.9196	-0.0068	0.1408	0.9615	-0.0636	0.1245	0.6096	0.1067	0.1274	0.402	-0.0948	0.1462	0.5168	-0.343	0.1876	0.0675	0.1916	0.4437	0.6658	-0.5305	0.8072
764	38	philtrum (I)	0.1175	0.1331	0.3776	0.1417	0.1596	0.3748	0.5291	1.2796	0.6793	0.0818	0.1353	0.5455	-0.6302	0.5831	0.2798	-0.2133	0.2085	0.3065	-0.3207	0.3277	0.3279	0.0366	0.1945	0.8509	-0.211	0.2058	0.3052	0.1648	0.2844	0.5623	0.0613	0.2165	0.7771	0.0582	0.1671	0.7275	0.1061	0.2335	0.6497	-0.2628	0.2951	0.3732	-1.1374	1.0474	0.2775	-0.4589	0.9188
765	38	philtrum (I)	0.0461	0.0774	0.5508	0.0216	0.0999	0.829	-0.2965	0.7711	0.7005	0.1026	0.0863	0.2345	0.2202	0.3079	0.4746	-0.06	0.1439	0.6765	0.2449	0.1754	0.1627	0.0322	0.1231	0.7937	-0.0481	0.1137	0.6722	-0.1873	0.1399	0.1805	-0.0616	0.1303	0.6364	0.0955	0.1082	0.3776	0.0106	0.1289	0.9347	0.3152	0.1706	0.0647	0.0724	0.3806	0.8491	-0.2647	0.6542
766	39	philtrum (I)	0.1367	0.0858	0.1111	0.157	0.1052	0.1359	0.1167	0.7742	0.8802	0.0806	0.0868	0.3534	0.09	0.3269	0.783	-0.0283	0.1461	0.8465	0.2201	0.2078	0.2895	0.104	0.1256	0.4079	-0.1207	0.1381	0.3822	-0.1082	0.1447	0.4547	0.0028	0.1463	0.9847	-0.056	0.1258	0.6563	-0.296	0.1541	0.0549	0.0757	0.157	0.6298	1.0378	0.6587	0.1151	-0.3127	0.6628
767	39	philtrum (I)	0.0047	0.0641	0.9409	-0.0547	0.0798	0.4927	1.2734	1.64	0.4375	-0.0692	0.0707	0.3274	0.082	0.2506	0.7435	-0.0803	0.1156	0.4874	-0.0826	0.1583	0.6019	-0.126	0.1021	0.2171	-0.0909	0.1027	0.3761	0.0626	0.1189	0.5988	-0.1021	0.1135	0.3685	0.0246	0.096	0.7975	0.0192	0.1261	0.8791	-0.1001	0.1588	0.5282	1.2456	0.6722	0.0639	-0.7296	0.7884
768	39	philtrum (I)	-0.0066	0.0726	0.9273	-0.0383	0.0926	0.6793	-0.6263	0.9928	0.5281	-0.012	0.0727	0.8684	-0.2159	0.3082	0.4837	0.0051	0.1247	0.9672	-0.2073	0.1692	0.2207	-0.1424	0.1208	0.2385	0.1328	0.1283	0.3005	-0.0055	0.1365	0.9677	-0.03	0.1367	0.8265	0.0627	0.116	0.589	0.1759	0.1387	0.2047	-0.1348	0.1556	0.3863	0.0977	0.4079	0.8107	-0.4733	0.6402
769	39	philtrum (I)	-0.1079	0.081	0.183	0.1739	0.1007	0.0843	-0.6913	1.1895	0.5611	-0.0663	0.0786	0.3985	0.2282	0.358	0.5238	-0.078	0.163	0.6321	0.3178	0.2204	0.1492	0.1991	0.131	0.1287	0.0623	0.1181	0.5976	0.0916	0.1642	0.5772	0.2495	0.1448	0.0848	-0.041	0.13	0.7523	-0.0738	0.136	0.5875	0.0418	0.1795	0.816	-0.4243	0.4802	0.3769	0.7896	0.9278
770	39	philtrum (I)	-0.0145	0.063	0.8176	-0.3167	0.0885	0.0003	-0.4488	0.891	0.6145	-0.1239	0.0686	0.0707	0.0507	0.2769	0.8547	-0.1011	0.1115	0.3646	-0.2883	0.1586	0.0692	-0.2277	0.1013	0.0246	0.0194	0.0985	0.844	-0.038	0.1237	0.7587	-0.2633	0.1129	0.0197	-0.0136	0.0985	0.8903	0.1037	0.1287	0.4201	-0.1709	0.1394	0.2201	0.1321	0.3453	0.702	-0.3186	0.5165
771	39	philtrum (I)	0.1175	0.064	0.0665	0.1721	0.0867	0.047	0.1049	0.6459	0.871	0.1748	0.0699	0.0124	0.1934	0.2692	0.4725	-0.0426	0.1183	0.7186	-0.0136	0.1569	0.9309	0.0143	0.1069	0.8934	-0.1862	0.1046	0.075	-0.0431	0.1245	0.7288	0.0417	0.1315	0.7513	-0.0637	0.1059	0.5475	-0.0737	0.1247	0.5548	0.0398	0.1591	0.8025	-0.0338	0.3567	0.9244	-0.0848	0.5703
772	39	philtrum (I)	0.0607	0.0567	0.2842	-0.0239	0.0753	0.7507	-0.036	0.5512	0.9479	0.1083	0.0623	0.0822	-0.3456	0.2634	0.1895	-0.1828	0.1032	0.0766	-0.1066	0.1448	0.4617	0.1031	0.0734	0.1599	-0.1095	0.0811	0.177	-0.0739	0.1189	0.5343	-0.1559	0.0974	0.1094	-0.017	0.0842	0.8402	0.0717	0.0911	0.4307	0.004	0.1236	0.9741	0.1992	0.2825	0.4806	0.309	0.5216
773	39	philtrum (I)	0.0143	0.0636	0.8222	0.2544	0.0868	0.0034	-0.7173	1.0515	0.4951	0.0875	0.0623	0.1603	0.2074	0.2795	0.4581	0.0884	0.1175	0.4521	0.0638	0.1532	0.677	0.1112	0.1059	0.2933	0.0719	0.0997	0.4706	-0.0072	0.115	0.9501	0.1028	0.124	0.407	-0.0868	0.0959	0.3656	-0.203	0.122	0.0961	0.0019	0.1503	0.9902	-0.2292	0.3744	0.5404	-0.3261	0.5851
774	39	philtrum (I)	0.0966	0.0695	0.1645	-0.0143	0.0926	0.8776	-0.9111	1.3344	0.4947	0.0588	0.0744	0.4297	-0.3221	0.3483	0.3551	-0.1236	0.1293	0.3392	0.0529	0.1729	0.7597	0.0119	0.113	0.9159	0.0583	0.1196	0.6257	0.005	0.1436	0.9723	-0.1361	0.1229	0.268	0.067	0.1217	0.5821	0.1504	0.1317	0.2535	0.1883	0.1603	0.2403	0.3975	0.4369	0.3629	0.4184	0.7323
775	39	philtrum (I)	0.0337	0.0557	0.5449	0.1486	0.0779	0.0565	-0.2746	0.6968	0.6935	0.1064	0.066	0.1071	0.1004	0.2679	0.7079	0.1884	0.1162	0.1051	0.197	0.1576	0.2111	0.1117	0.0948	0.2385	0.0357	0.0974	0.7143	-0.0653	0.1068	0.5408	0.207	0.1063	0.0516	-0.0714	0.1013	0.4807	-0.2158	0.1141	0.0584	0.0224	0.1453	0.8774	-0.1357	0.3282	0.6793	-0.4141	0.5976
776	40	nose (II)	-0.0013	0.0894	0.9881	0.0198	0.1062	0.852	0.7144	1.1345	0.5289	-0.0071	0.0878	0.9359	0.7834	0.4771	0.1006	-0.0102	0.1515	0.9464	0.3316	0.2205	0.1328	0.2315	0.1542	0.1334	0.1666	0.1236	0.1778	0.1746	0.1751	0.3188	0.0138	0.1516	0.9273	0.0625	0.1428	0.6615	0.1988	0.1705	0.2436	0.1548	0.1868	0.4073	0.1901	0.4878	0.6968	-1.2621	1.3002
777	40	nose (II)	-0.0709	0.0655	0.2791	0.0186	0.0684	0.7854	-0.288	0.6165	0.6404	-0.0792	0.0652	0.2248	-0.2024	0.2604	0.437	-0.0838	0.1184	0.4793	-0.0912	0.1532	0.5516	0.0747	0.0948	0.4306	0.092	0.0976	0.3459	0.1441	0.1489	0.3333	0.0056	0.1187	0.9626	-0.0483	0.1089	0.6575	0.0351	0.1136	0.7571	0.1547	0.1591	0.3307	-0.0649	0.33	0.844	0.0923	0.469
778	40	nose (II)	0.058	0.0887	0.5134	-0.019	0.109	0.8618	-0.1168	0.8717	0.8934	0.0696	0.0913	0.4459	0.0937	0.4016	0.8154	0.2132	0.2105	0.3111	-0.0495	0.2086	0.8122	-0.0226	0.1414	0.8732	-0.0146	0.1421	0.9184	-0.0237	0.1845	0.8976	0.1155	0.1608	0.4725	0.1041	0.1619	0.52	0.0124	0.1824	0.946	-0.1177	0.2233	0.5981	-0.1167	0.4268	0.7846	0.1759	0.7656
779	40	nose (II)	0.0629	0.0926	0.4966	-0.2004	0.0738	0.0066	-0.1801	0.6669	0.7872	0.0757	0.0958	0.4298	0.1653	0.2924	0.5719	-0.0311	0.1275	0.807	-0.058	0.1647	0.7249	-0.1299	0.115	0.2587	0.0158	0.0885	0.8578	-0.0337	0.2023	0.8675	-0.0033	0.1058	0.975	0.0978	0.0969	0.3128	-0.0286	0.1162	0.8056	0.0838	0.1416	0.5537	-0.0402	0.3176	0.8992	0.9273	0.8709
780	40	nose (II)	0.0122	0.0657	0.8527	0.0501	0.0685	0.465	0.5389	0.8642	0.5329	-0.015	0.0666	0.8222	0.1018	0.2664	0.7025	-0.0159	0.1117	0.8872	0.198	0.1462	0.1756	0.0695	0.0998	0.4861	0.0792	0.0896	0.3764	-0.0113	0.1264	0.9287	0.0173	0.103	0.8663	-0.0427	0.0947	0.6517	0.1255	0.1088	0.2489	-0.026	0.1288	0.8398	0.2392	0.3305	0.4692	-0.7864	0.7809
781	40	nose (II)	-0.0031	0.0927	0.9737	0.2031	0.0894	0.0231	0.5592	0.9789	0.5678	-0.0077	0.0966	0.9362	0.2469	0.3393	0.4668	0.0563	0.1417	0.6909	0.1731	0.198	0.3821	0.1414	0.1327	0.2867	-0.0682	0.111	0.5391	-0.0407	0.1929	0.8328	-0.01	0.1226	0.9349	-0.0553	0.1239	0.6556	0.0188	0.1403	0.8936	-0.1982	0.1718	0.2487	0.0985	0.3873	0.7992	-1.4799	1.3047
782	40	nose (II)	-0.0034	0.0953	0.9711	-0.1217	0.0692	0.0784	-0.403	0.7713	0.6013	0.0232	0.0981	0.8129	0.031	0.253	0.9026	0.0295	0.1132	0.7944	-0.0167	0.1554	0.9145	-0.0645	0.1153	0.5757	-0.0243	0.0825	0.7686	0.0318	0.1901	0.8672	-0.0185	0.096	0.847	0.1021	0.0968	0.2916	-0.059	0.1084	0.5864	0.1072	0.1399	0.4434	-0.1266	0.311	0.6839	1.0379	0.9964
783	41	nose (II)	-0.0175	0.084	0.8349	-0.0697	0.1197	0.5607	0.2342	0.861	0.7856	0.0011	0.0893	0.9899	0.2749	0.3411	0.4203	-0.1696	0.1553	0.275	-0.1012	0.1953	0.6044	0.1704	0.1409	0.2266	0.1259	0.1311	0.3371	0.0598	0.1812	0.7414	0.1285	0.1557	0.409	0.029	0.1247	0.8163	0.0737	0.1428	0.6057	0.1565	0.1805	0.3859	-0.3136	0.4649	0.5	-0.398	0.7012
784	41	nose (II)	-0.0346	0.0771	0.6541	0.0248	0.0799	0.756	-0.5793	0.9347	0.5354	-0.0473	0.0859	0.5815	0.4645	0.3079	0.1314	0.0614	0.121	0.6115	-0.1037	0.1645	0.5287	-0.0465	0.1195	0.6969	0.0991	0.0945	0.2947	0.0869	0.1519	0.5672	0.0929	0.1169	0.4268	-0.0127	0.0988	0.8977	0.1789	0.1147	0.1188	-0.1682	0.1434	0.2407	-0.254	0.3984	0.5239	0.3929	0.6441
785	41	nose (II)	-0.0596	0.0754	0.429	0.0417	0.0864	0.6292	-0.6221	1.0232	0.5432	-0.0553	0.083	0.5052	0.5095	0.322	0.1136	0.081	0.1273	0.5243	-0.0976	0.1717	0.5698	-0.0666	0.1237	0.5902	0.1312	0.1061	0.2164	0.109	0.1532	0.4769	0.1182	0.124	0.3403	0.0227	0.1028	0.8254	0.1205	0.1227	0.3262	-0.1802	0.1493	0.2274	-0.2382	0.4152	0.5662	0.5188	0.743
786	41	nose (II)	-0.0107	0.0706	0.8797	-0.0057	0.0784	0.9419	0.6069	0.904	0.502	0.0319	0.073	0.6624	-0.0309	0.2472	0.9005	-0.04	0.102	0.6948	0.0455	0.1488	0.7596	0.0029	0.0957	0.9757	-0.0671	0.0839	0.4236	-0.1009	0.1419	0.4772	-0.0553	0.104	0.5948	0.018	0.0924	0.8453	-0.2218	0.1032	0.0316	0.0655	0.132	0.6195	0.0948	0.3259	0.7711	-0.0539	0.4721
787	41	nose (II)	0.0657	0.0554	0.2358	0.0352	0.0691	0.61	0.0569	0.5149	0.912	0.0398	0.0501	0.4268	0.1771	0.2226	0.4262	0.0258	0.0989	0.7944	-0.0096	0.1206	0.9363	-0.1221	0.0856	0.1539	-0.206	0.0842	0.0145	-0.1792	0.1023	0.0798	-0.1888	0.1076	0.0793	-0.1141	0.0853	0.1807	-0.0478	0.0987	0.628	-0.1472	0.132	0.2648	-0.0233	0.2965	0.9373	0.1466	0.4327
788	42	nose (II)	0.0798	0.0759	0.2933	-0.005	0.074	0.9461	0.0792	0.5035	0.875	-0.0011	0.0755	0.9879	0.2138	0.2344	0.3616	-0.1026	0.1068	0.3368	-0.1261	0.1295	0.3305	0.2265	0.0928	0.0147	-0.056	0.0966	0.562	0.1097	0.1368	0.4227	0.1029	0.1055	0.3295	-0.2097	0.096	0.0289	-0.0064	0.1045	0.9514	-0.1368	0.117	0.2424	-0.1439	0.2898	0.6194	-0.1051	0.4847
789	42	nose (II)	-0.1068	0.076	0.1598	0.0878	0.0787	0.2646	0.2613	0.6788	0.7003	-0.1217	0.0753	0.1062	0.1249	0.2727	0.6469	-0.0647	0.1262	0.6083	-0.2973	0.1545	0.0544	0.0938	0.0999	0.3481	-0.064	0.0946	0.4986	-0.1164	0.1667	0.4851	-0.0651	0.1088	0.5494	-0.1295	0.1071	0.2268	0.0226	0.1216	0.8522	-0.26	0.1568	0.0972	0.0854	0.3388	0.801	0.121	0.5886
790	42	nose (II)	0.1898	0.0938	0.043	-0.1027	0.1062	0.3337	-0.6105	1.0691	0.568	0.101	0.0814	0.2143	-0.068	0.3358	0.8396	0.2467	0.1544	0.11	0.2664	0.2022	0.1877	0.1566	0.1248	0.2097	0.0764	0.1313	0.5604	0.3775	0.1698	0.0262	0.0542	0.1546	0.726	0.1029	0.1216	0.3974	0.0715	0.1591	0.6529	-0.1242	0.1793	0.4887	-0.3358	0.4463	0.4518	-0.0709	0.6378
791	42	nose (II)	0.1054	0.0758	0.1643	0.2298	0.1024	0.0248	0.3101	0.8559	0.7171	0.031	0.0763	0.6842	-0.1293	0.3447	0.7076	-0.0667	0.1389	0.6312	-0.0588	0.1812	0.7457	-0.007	0.1262	0.9559	-0.034	0.1188	0.7749	-0.0445	0.1494	0.7658	-0.2219	0.1383	0.1086	-0.1171	0.1193	0.3262	-0.1601	0.1238	0.1959	-0.4216	0.1769	0.0172	-0.0597	0.3868	0.8773	-0.1601	0.6452
792	42	nose (II)	0.013	0.0688	0.8504	0.0131	0.0949	0.8905	-0.3594	0.8515	0.673	-0.0652	0.0673	0.3325	0.4068	0.3156	0.1974	-0.1665	0.1274	0.1912	-0.2321	0.1882	0.2175	-0.109	0.1137	0.3378	-0.0849	0.1072	0.4281	-0.077	0.133	0.5625	0.1172	0.136	0.3888	-0.1565	0.122	0.1996	0.0635	0.131	0.6282	-0.0851	0.1348	0.5276	0.1457	0.3722	0.6954	-0.1851	0.5529
793	42	nose (II)	0.0945	0.0686	0.1686	-0.1041	0.1055	0.3238	0.6923	1.0553	0.5118	0.0215	0.0738	0.7706	0.0295	0.3262	0.9279	-0.0626	0.137	0.6478	0.0047	0.189	0.9802	0.2237	0.1332	0.0931	-0.0936	0.1194	0.4332	0.0877	0.1452	0.5458	-0.0319	0.1326	0.8096	-0.1548	0.1224	0.206	-0.2253	0.1292	0.0811	-0.104	0.1562	0.5054	0.0537	0.4094	0.8956	0.4156	0.6116
794	42	nose (II)	-0.0672	0.0634	0.2894	0.1809	0.0893	0.0428	0.4854	0.8736	0.5784	-0.0439	0.0621	0.4803	-0.4345	0.314	0.1665	0.0753	0.1203	0.5315	-0.0146	0.1499	0.9224	0.0049	0.1039	0.9625	-0.0167	0.1052	0.8737	-0.1465	0.1236	0.2356	-0.1291	0.1218	0.2893	0.0105	0.0946	0.9118	-0.0989	0.1144	0.3873	-0.1593	0.147	0.2788	0.3701	0.3909	0.3437	0.33	0.5538
795	42	nose (II)	0.0899	0.0557	0.1068	-0.0502	0.0751	0.5038	0.1661	0.5047	0.7421	0.0633	0.057	0.2671	0.025	0.2242	0.9111	0.0939	0.098	0.338	0.1121	0.1246	0.3684	0.1104	0.0787	0.1606	0.0131	0.0784	0.8677	0.0417	0.1068	0.6958	-0.083	0.0912	0.3626	-0.0022	0.0864	0.9797	0.0314	0.0916	0.7316	-0.0168	0.1076	0.8756	-0.3412	0.2951	0.2476	0.0173	0.4585
796	42	nose (II)	-0.0477	0.0668	0.4751	-0.0324	0.0605	0.5918	0.2233	0.4853	0.6455	-0.0042	0.0674	0.9505	-0.1276	0.2008	0.525	0.0027	0.0978	0.9782	0.092	0.1286	0.4744	-0.1571	0.0748	0.0358	-0.0147	0.0787	0.8519	-0.1444	0.1246	0.2465	-0.085	0.092	0.3556	0.0997	0.0828	0.2284	-0.0866	0.0879	0.3244	0.1022	0.1139	0.3695	0.2273	0.2905	0.4339	0.1704	0.4256
797	42	nose (II)	0.102	0.0652	0.1179	-0.016	0.0853	0.8508	0.1474	0.599	0.8056	0.0146	0.066	0.825	0.2999	0.2822	0.2878	0.0165	0.1186	0.8895	-0.081	0.1378	0.5566	0.0554	0.0868	0.5234	-0.0872	0.0963	0.3651	-0.0701	0.1224	0.5668	-0.099	0.1082	0.3602	-0.1358	0.1022	0.1839	0.0338	0.1071	0.7525	-0.2339	0.1269	0.0654	-0.1778	0.3148	0.5722	0.1612	0.599
798	42	nose (II)	0.0607	0.0588	0.302	0.0603	0.0661	0.3615	-0.0201	0.4785	0.9665	0.0004	0.0578	0.9947	0.1855	0.2136	0.3852	-0.0545	0.0896	0.5431	-0.169	0.1265	0.1814	0.0063	0.083	0.9398	-0.0105	0.0815	0.8977	0.0834	0.1117	0.4552	-0.0616	0.0886	0.4867	-0.0905	0.0889	0.3091	-0.045	0.0931	0.6289	-0.1811	0.1235	0.1427	-0.1654	0.2817	0.5571	-0.0818	0.4962
799	42	nose (II)	0.0713	0.0751	0.3427	-0.0483	0.0918	0.5989	-0.2219	0.7161	0.7566	0.0914	0.0708	0.1969	-0.0992	0.2872	0.7297	0.1989	0.1321	0.1322	0.2306	0.1735	0.1837	-0.0315	0.1165	0.7867	0.0179	0.1024	0.8616	-0.0066	0.1333	0.9606	0.0614	0.1187	0.6049	0.0983	0.1127	0.3832	0.1379	0.1322	0.2968	0.1831	0.1663	0.2709	-0.0245	0.4054	0.9518	0.2534	0.6505
800	42	nose (II)	-0.0779	0.0718	0.2782	-0.2305	0.1005	0.0218	-0.1698	0.7368	0.8177	-0.0024	0.0759	0.975	0.1733	0.3492	0.6197	-0.0677	0.1365	0.62	0.0434	0.1659	0.7934	0.1137	0.1245	0.3613	0.0322	0.1126	0.7747	0.0743	0.1393	0.5938	0.2135	0.1362	0.117	0.0377	0.1153	0.7439	0.1007	0.1242	0.4175	0.3981	0.1791	0.0262	-0.1428	0.4046	0.7241	-0.1638	0.5839
801	43	nose (II)	0.0285	0.0557	0.6088	-0.0088	0.0634	0.8899	-0.3196	0.6385	0.6167	-0.0189	0.0589	0.7481	0.1617	0.1832	0.3773	-0.1539	0.088	0.0804	-0.1659	0.1278	0.1943	-0.2305	0.0789	0.0035	0.0492	0.067	0.4626	-0.1014	0.109	0.3521	-0.1674	0.0848	0.0485	0.0068	0.0743	0.9267	0.0501	0.0862	0.5613	0.0505	0.1125	0.6535	-0.1206	0.2548	0.6358	-0.0091	0.3836
802	43	nose (II)	0.1326	0.0652	0.0418	-0.128	0.0773	0.0977	0.1046	0.609	0.8637	0.0652	0.0669	0.3301	0.1729	0.259	0.5045	-0.1263	0.1149	0.2716	-0.0361	0.1716	0.8335	-0.1118	0.0879	0.2036	0.0029	0.087	0.9733	-0.2003	0.1224	0.1018	-0.205	0.116	0.0772	-0.1403	0.0962	0.1448	-0.009	0.1033	0.9307	0.0452	0.1494	0.7624	-0.2533	0.3462	0.4643	-0.2069	0.5536
803	43	nose (II)	-0.0507	0.0494	0.3046	0.0232	0.0689	0.7361	-0.7299	1.0076	0.4688	-0.045	0.0522	0.389	0.0599	0.2297	0.7942	0.0486	0.0952	0.6099	-0.0211	0.1177	0.8579	-0.1464	0.0807	0.0696	0.1015	0.0828	0.2201	0.1068	0.1087	0.326	-0.1386	0.1021	0.1744	0.1328	0.0908	0.1436	0.0518	0.0958	0.5886	0.0216	0.1117	0.8467	0.1285	0.2788	0.6448	0.6033	0.6617
804	43	nose (II)	0.0004	0.0675	0.9949	0.2428	0.1108	0.0284	-0.6087	1.0018	0.5434	-0.1163	0.0754	0.123	0.1423	0.2941	0.6284	-0.2158	0.1276	0.091	-0.0629	0.1538	0.6826	-0.1651	0.1133	0.1452	-0.0462	0.0849	0.5861	-0.1349	0.1166	0.2474	-0.2478	0.1404	0.0774	-0.1533	0.1023	0.1338	-0.0801	0.1243	0.5192	-0.3743	0.1506	0.0129	0.1229	0.3876	0.7512	-0.2971	0.5986
805	43	nose (II)	0.0026	0.047	0.9554	0.0441	0.0684	0.5194	0.2367	0.5936	0.6901	0.0585	0.0533	0.272	-0.2818	0.203	0.165	0.0631	0.0899	0.4828	0.24	0.1307	0.0662	0.1909	0.0897	0.0332	-0.0667	0.0824	0.4183	-0.0209	0.1039	0.8408	0.1741	0.0892	0.051	-0.0703	0.0754	0.351	0.0088	0.088	0.9205	0.0948	0.1101	0.3889	0.1296	0.2542	0.6103	0.1224	0.4429
806	43	nose (II)	0.0594	0.0607	0.3278	0.1299	0.0672	0.053	-0.457	0.7566	0.5458	0.0967	0.0569	0.089	0.1611	0.2153	0.4543	-0.1703	0.0943	0.0709	-0.0249	0.1344	0.8531	-0.0517	0.0947	0.5848	0.0595	0.0851	0.4845	-0.0558	0.1215	0.646	-0.0451	0.0994	0.6502	-0.0163	0.0859	0.8498	-0.0489	0.1028	0.6341	0.181	0.1171	0.122	-0.2153	0.3015	0.4752	0.4794	0.6137
807	43	nose (II)	0.0245	0.0672	0.7152	-0.138	0.0811	0.0888	0.2433	0.6412	0.7043	0.1219	0.0726	0.0929	-0.1322	0.2582	0.6086	0.0697	0.1149	0.544	0.206	0.1454	0.1567	0.0397	0.1057	0.7073	-0.0169	0.0975	0.8622	-0.0868	0.141	0.5383	0.1628	0.1223	0.1829	0.0152	0.0957	0.874	0.1336	0.1039	0.1985	0.4076	0.1381	0.0032	0.0007	0.3352	0.9983	0.4529	0.6467
808	43	nose (II)	-0.0096	0.0746	0.8976	-0.1521	0.1045	0.1456	0.5532	0.9829	0.5735	-0.0199	0.0812	0.8068	0.1674	0.3393	0.6218	0.1362	0.1483	0.3582	-0.0022	0.185	0.9904	0.149	0.1114	0.1813	-0.1373	0.1219	0.26	-0.0915	0.1418	0.519	0.1563	0.1385	0.2591	0.0025	0.1162	0.9828	0.1623	0.1536	0.2905	0.0565	0.161	0.7254	-0.0664	0.3811	0.8617	-0.2995	0.6801
809	43	nose (II)	-0.0366	0.0555	0.5094	0.0367	0.0713	0.6064	0.3924	0.6967	0.5733	-0.06	0.0595	0.3138	0.079	0.2416	0.7438	-0.0399	0.1005	0.6911	-0.0306	0.139	0.8255	0.0308	0.0927	0.7395	-0.035	0.0887	0.6932	0.0845	0.1068	0.4287	-0.0553	0.107	0.6054	-0.1116	0.0946	0.2384	-0.2943	0.0932	0.0016	-0.3052	0.1234	0.0134	0.0936	0.3035	0.7579	-0.3493	0.5654
810	43	nose (II)	-0.0759	0.0643	0.2378	0.2538	0.11	0.0211	-0.3453	0.8225	0.6746	-0.1407	0.0735	0.0557	0.06	0.2981	0.8404	-0.1659	0.1183	0.1609	-0.0883	0.1471	0.5483	-0.1076	0.1057	0.3087	-0.0597	0.0887	0.5009	-0.0455	0.1118	0.6841	-0.1	0.1315	0.4469	-0.0872	0.097	0.3685	-0.0964	0.1149	0.4016	-0.3317	0.1612	0.0396	0.2241	0.4037	0.5788	-0.2306	0.5312
811	43	nose (II)	-0.0096	0.1011	0.9247	-0.237	0.0917	0.0097	0.7171	1.0204	0.4822	0.0888	0.1012	0.3803	-0.0573	0.2793	0.8374	0.0019	0.1271	0.9883	-0.1153	0.2026	0.5691	-0.0773	0.1243	0.5338	0.0603	0.103	0.5582	0.0565	0.2054	0.7833	0.1535	0.1315	0.243	0.1071	0.1195	0.3701	-0.0322	0.1326	0.8082	0.3657	0.1826	0.0452	-0.1485	0.4119	0.7185	0.0838	0.5157
812	44	nose (II)	0.0029	0.0612	0.9625	-0.1046	0.0776	0.1776	0.7733	1.11	0.486	-0.0073	0.0673	0.9132	0.1157	0.2796	0.679	0.0241	0.1097	0.8263	-0.0482	0.143	0.736	0.0146	0.107	0.8914	0.0188	0.0933	0.8407	-0.0381	0.1228	0.7565	-0.145	0.1184	0.2206	0.0306	0.098	0.7548	0.1334	0.1358	0.3258	-0.0148	0.1428	0.9174	-0.0962	0.3126	0.7582	-0.3944	0.6089
813	44	nose (II)	-0.0458	0.0743	0.5378	-0.0694	0.0825	0.4002	0.3723	0.7108	0.6004	-0.0798	0.076	0.2937	0.1484	0.3049	0.6266	0.0315	0.1327	0.8124	-0.2323	0.1644	0.1576	0.0707	0.1049	0.5006	0.0447	0.1092	0.6819	0.045	0.1449	0.7563	-0.0891	0.1224	0.4669	-0.0408	0.1338	0.7602	0.041	0.1259	0.7445	-0.1131	0.1547	0.4646	0.6323	0.4275	0.1391	-0.3323	0.603
814	44	nose (II)	-0.0452	0.0638	0.4787	-0.126	0.0837	0.1323	0.4313	0.7354	0.5575	-0.0236	0.0635	0.7108	0.0394	0.2999	0.8954	-0.0155	0.1271	0.9028	-0.2619	0.1684	0.1198	-0.0085	0.1014	0.9333	0.0475	0.1032	0.6454	0.0545	0.1213	0.6534	-0.0594	0.1225	0.6276	-0.078	0.1256	0.5347	0.0241	0.1248	0.8468	-0.0755	0.1658	0.6488	0.3934	0.3661	0.2826	-0.0972	0.5421
815	44	nose (II)	-0.0571	0.0646	0.3772	-0.0374	0.0778	0.6307	0.2501	0.6331	0.6928	-0.0605	0.0602	0.3151	0.1286	0.2573	0.6172	0.0487	0.1079	0.6519	-0.0399	0.1408	0.7771	0.0879	0.0978	0.3687	-0.0628	0.091	0.4901	-0.0571	0.1125	0.6115	0.0624	0.1113	0.5754	-0.0575	0.0988	0.5605	-0.0685	0.1118	0.5399	-0.118	0.1465	0.4206	0.1401	0.3164	0.658	-0.1543	0.509
816	44	nose (II)	-0.0384	0.0677	0.5704	-0.1067	0.0851	0.2096	0.125	0.6015	0.8353	-0.0954	0.0729	0.1909	-0.2114	0.2563	0.4095	0.1893	0.1157	0.1018	-0.2068	0.147	0.1595	-0.057	0.1087	0.5999	0.1135	0.0985	0.2494	0.023	0.1374	0.8673	-0.0245	0.1015	0.809	-0.1053	0.1061	0.3211	0.073	0.11	0.507	-0.3221	0.1399	0.0213	0.2533	0.3288	0.4411	-0.582	0.6884
817	44	nose (II)	-0.0208	0.0621	0.738	0.0153	0.0768	0.8423	-0.1383	0.6005	0.8179	0.0792	0.0579	0.1718	-0.0666	0.2579	0.7962	0.0174	0.1067	0.8706	-0.0533	0.1412	0.7058	0.0872	0.092	0.3429	0.0136	0.0846	0.8724	0.0326	0.1208	0.7871	0.0297	0.104	0.7749	-0.0743	0.0934	0.4264	0.0425	0.1139	0.7093	-0.1491	0.1235	0.2274	0.491	0.3382	0.1466	0.2456	0.5675
818	44	nose (II)	0.1123	0.1217	0.356	0.1352	0.1652	0.4131	-1.1525	1.9741	0.5593	0.0633	0.1105	0.5666	-0.4613	0.5931	0.4367	-0.0754	0.2052	0.7131	-0.021	0.2551	0.9344	0.2568	0.1931	0.1834	-0.1117	0.2094	0.5939	0.2311	0.2634	0.3804	0.1845	0.2163	0.3936	-0.1753	0.2235	0.4327	-0.0491	0.214	0.8187	-0.0774	0.2584	0.7644	0.8406	0.8086	0.2986	0.7722	1.2012
819	44	nose (II)	-0.0152	0.0724	0.8338	0.0832	0.1087	0.444	-0.6623	1.1093	0.5505	0.1294	0.0849	0.1274	-0.1115	0.3279	0.7339	0.0565	0.1505	0.7072	0.1316	0.2081	0.5272	0.0551	0.1394	0.6928	0.1218	0.1255	0.3315	0.028	0.1633	0.864	-0.1243	0.1497	0.4063	0.0203	0.133	0.8787	0.3605	0.1819	0.0475	-0.072	0.1631	0.6589	0.3405	0.44	0.4391	0.0687	0.6795
820	44	nose (II)	-0.0499	0.1518	0.7425	0.1599	0.1796	0.3734	-1.7827	2.5939	0.4919	0.0926	0.1755	0.5979	-0.3767	0.5523	0.4953	0.0192	0.2216	0.9309	-0.1305	0.2862	0.6485	0.1077	0.2411	0.6552	0.1108	0.2058	0.5903	0.1173	0.3077	0.7031	-0.1749	0.2365	0.4595	-0.1549	0.2019	0.443	0.476	0.4327	0.2713	-0.5122	0.3827	0.1807	0.9421	0.9306	0.3114	-0.0218	1.0113
821	44	nose (II)	0.0114	0.0644	0.86	-0.0892	0.0761	0.241	0.758	0.9791	0.4388	-0.034	0.0649	0.6	-0.1954	0.2685	0.4667	0.15	0.0943	0.1118	-0.051	0.116	0.6603	-0.0824	0.0882	0.3501	0.0179	0.0831	0.8295	-0.1701	0.1221	0.1636	-0.1496	0.1055	0.1561	0.0485	0.0818	0.5532	-0.0377	0.107	0.7249	-0.0238	0.1275	0.8517	-0.2369	0.3362	0.481	-0.3534	0.5026
822	44	nose (II)	-0.035	0.06	0.56	-0.0511	0.0717	0.4765	0.2043	0.624	0.7433	-0.0547	0.0608	0.3683	-0.2567	0.2497	0.3039	0.2029	0.0982	0.0388	0.1227	0.1396	0.3794	0.111	0.0864	0.1993	0.0227	0.0824	0.7831	-0.0992	0.1144	0.386	-0.031	0.0948	0.7439	-0.0152	0.0875	0.8622	0.0381	0.098	0.6978	-0.0079	0.1234	0.9487	-0.0056	0.3116	0.9858	-0.5836	0.6039
823	44	nose (II)	-0.112	0.0956	0.2415	0.1309	0.1061	0.2172	0.7853	1.3137	0.55	-0.0828	0.0984	0.4004	0.3633	0.4011	0.3651	-0.1595	0.1626	0.3267	-0.4714	0.2168	0.0297	-0.0567	0.1465	0.6989	-0.1189	0.1348	0.378	0.0043	0.2154	0.984	-0.1699	0.1525	0.2654	-0.1126	0.139	0.418	-0.136	0.1457	0.3506	-0.684	0.2511	0.0065	-0.1313	0.4138	0.751	0.2384	0.7008
824	44	nose (II)	0.0296	0.0722	0.6823	0.1396	0.0682	0.0408	-0.0299	0.4899	0.9513	-0.0399	0.0663	0.5473	0.0948	0.2568	0.7119	-0.0439	0.103	0.6699	-0.0587	0.131	0.6544	-0.0919	0.0979	0.3481	-0.0306	0.077	0.6909	-0.061	0.133	0.6467	-0.0465	0.1007	0.6445	0.0905	0.1063	0.3944	-0.1844	0.109	0.0909	0.0184	0.1501	0.9026	-0.3387	0.3034	0.2642	0.3318	0.5529
825	44	nose (II)	-0.0547	0.0823	0.5066	0.0722	0.0775	0.3514	-0.5673	0.8855	0.5217	-0.1118	0.0794	0.1589	-0.1021	0.2379	0.668	-0.0388	0.1004	0.6987	-0.2429	0.1564	0.1204	-0.0737	0.1243	0.5533	-0.0631	0.0809	0.4353	0.0033	0.1831	0.9857	0.0237	0.1114	0.8314	-0.195	0.0977	0.0459	-0.0862	0.102	0.3981	-0.3771	0.132	0.0043	0.0826	0.3266	0.8002	-0.3899	0.6721
826	44	nose (II)	0.0421	0.0876	0.6311	-0.0609	0.0881	0.4891	-0.8991	1.2436	0.4697	0.1248	0.0875	0.1537	-0.3053	0.2797	0.275	-0.0041	0.1196	0.9726	0.312	0.1604	0.0517	-0.0504	0.12	0.6748	0.0822	0.0994	0.408	0.0643	0.1849	0.728	0.1764	0.1287	0.1706	-0.0337	0.1215	0.7814	0.184	0.1253	0.1418	0.3709	0.1631	0.023	-0.2411	0.3865	0.5328	0.0994	0.5589
827	45	nose (II)	-0.0287	0.0567	0.6132	-0.1267	0.0764	0.0974	-0.1867	0.6437	0.7717	-0.0291	0.0592	0.6228	0.1917	0.243	0.4301	0.0478	0.0968	0.6212	-0.1151	0.1347	0.3926	-0.0828	0.0839	0.3236	-8.3267e-05	0.0914	0.9993	-0.0626	0.113	0.5796	-0.2786	0.1084	0.0102	-0.0181	0.0897	0.8399	0.0253	0.1033	0.8066	-0.1557	0.1169	0.1829	0.6666	0.3921	0.0891	-0.0213	0.4165
828	45	nose (II)	-0.0181	0.1035	0.861	-0.0613	0.0806	0.4469	-0.2845	0.7008	0.6847	-0.0796	0.0943	0.3988	-0.0717	0.2278	0.7528	0.1776	0.1485	0.2318	-0.1111	0.156	0.4764	-0.0028	0.1162	0.981	-0.0337	0.0921	0.7141	-0.0543	0.2313	0.8142	-0.0955	0.1068	0.3711	-0.01	0.1072	0.9257	-0.0948	0.1089	0.3839	-0.2359	0.1454	0.1047	-0.0218	0.3136	0.9447	-0.4391	0.5828
829	45	nose (II)	0.0586	0.0665	0.3784	0.1535	0.106	0.1475	-0.0563	0.6988	0.9358	0.0395	0.0667	0.5543	-0.0151	0.2903	0.9585	-0.1167	0.1267	0.357	0.0592	0.1726	0.7314	0.0598	0.1086	0.5821	0.1067	0.114	0.3493	0.1678	0.1307	0.1994	0.2028	0.1167	0.0824	0.1786	0.1117	0.1098	-0.3229	0.1388	0.02	0.0707	0.1755	0.6871	-0.5605	0.4415	0.2042	0.4117	0.619
830	45	nose (II)	0.1123	0.0824	0.1732	-0.0193	0.0806	0.8106	-0.1569	0.6938	0.8211	0.1313	0.0837	0.1166	0.2987	0.2825	0.2903	-0.3106	0.171	0.0694	-0.0958	0.191	0.6158	0.0181	0.1279	0.8877	-0.0723	0.1028	0.4818	-0.0781	0.1778	0.6604	-0.0779	0.1161	0.5025	-0.1015	0.1268	0.4237	0.025	0.1204	0.8353	0.0659	0.1631	0.6861	0.3676	0.3643	0.3129	0.2991	0.5719
831	45	nose (II)	0.1314	0.0745	0.0778	0.0782	0.0818	0.3386	-0.4585	0.8539	0.5913	0.1601	0.0773	0.0383	0.1052	0.2331	0.6518	-0.1714	0.1315	0.1923	0.0943	0.1599	0.5554	0.087	0.1083	0.422	0.0035	0.1113	0.9752	0.0521	0.1541	0.7352	0.1137	0.1052	0.2798	-0.0058	0.1046	0.9557	-0.0389	0.1223	0.7507	0.1654	0.1435	0.2492	-0.0339	0.3258	0.9171	0.1072	0.4985
832	45	nose (II)	0.0594	0.0576	0.3026	0.0203	0.0847	0.8109	0.8518	1.1735	0.4679	0.0472	0.0627	0.4514	-0.0911	0.2579	0.7241	0.1337	0.1074	0.2129	0.2011	0.1433	0.1606	0.0357	0.1107	0.7471	0.0025	0.0912	0.9779	-0.0509	0.1278	0.6907	0.0296	0.1044	0.7767	-0.0283	0.0942	0.7642	0.189	0.1099	0.0854	0.0187	0.1378	0.8922	0.0198	0.2957	0.9467	-0.4108	0.5432
833	45	nose (II)	0.0199	0.0624	0.7498	0.1081	0.0719	0.133	-0.2292	0.5355	0.6687	-0.0435	0.0641	0.4975	-0.0677	0.233	0.7713	-0.0315	0.0983	0.7485	-0.0762	0.1217	0.5311	0.1363	0.0817	0.0951	-0.0643	0.0846	0.447	0.0412	0.1232	0.7379	0.044	0.0902	0.6258	-0.1273	0.0865	0.1408	-0.0933	0.0967	0.3346	-0.1474	0.1205	0.2214	0.2352	0.2927	0.4217	0.0534	0.4097
834	45	nose (II)	-0.0835	0.0591	0.1579	-0.1023	0.088	0.2451	0.1938	0.6152	0.7527	-0.1187	0.0629	0.0591	0.2623	0.2875	0.3615	0.0899	0.1045	0.39	0.0875	0.1396	0.5305	-0.0612	0.1037	0.5549	0.0848	0.1045	0.417	-0.0833	0.1216	0.4931	-0.0051	0.1035	0.9607	0.0872	0.1071	0.4154	-0.0501	0.1389	0.7181	0.1123	0.1384	0.4171	0.0136	0.3293	0.967	0.1375	0.513
835	45	nose (II)	0.1035	0.071	0.1448	0.0088	0.0716	0.9023	-0.3265	0.6538	0.6174	0.1194	0.0742	0.1076	-0.011	0.2244	0.961	-0.0718	0.1059	0.4975	0.0938	0.1344	0.4854	0.1349	0.1179	0.2523	0.0188	0.0901	0.8346	0.0648	0.1743	0.7099	0.2271	0.097	0.0192	-0.0363	0.1072	0.7349	-0.1005	0.1008	0.3187	0.061	0.1359	0.6533	0.0808	0.2747	0.7685	-0.2063	0.4299
836	45	nose (II)	-0.0623	0.0678	0.358	-0.0914	0.0772	0.2365	0.8965	1.1529	0.4368	-0.0637	0.068	0.3485	-0.1671	0.2565	0.5146	0.0909	0.1046	0.3849	0.0595	0.1337	0.6562	-0.1162	0.0965	0.2287	0.0218	0.0927	0.8142	-0.0405	0.123	0.7417	-0.0679	0.0957	0.4785	0.1182	0.0896	0.187	-0.029	0.1201	0.8092	0.0541	0.1356	0.6899	0.1132	0.2987	0.7047	-0.0693	0.4262
837	45	nose (II)	-0.0046	0.0758	0.9519	-0.0467	0.0708	0.5097	0.1977	0.6814	0.7717	-0.0473	0.0767	0.5376	-0.2567	0.2247	0.2533	0.2457	0.1187	0.0385	-0.0229	0.1495	0.8783	0.1474	0.0934	0.1144	-0.0159	0.0899	0.8594	0.0357	0.1415	0.801	-0.0271	0.1106	0.8064	-0.007	0.0948	0.9412	-0.1388	0.1059	0.1898	-0.2096	0.1405	0.1359	0.2558	0.3408	0.4529	-0.7797	0.7633
838	45	nose (II)	-0.0333	0.0655	0.6108	0.0214	0.0826	0.7958	-0.3226	0.7206	0.6544	-0.0552	0.0618	0.3714	-0.0639	0.2755	0.8167	-0.0182	0.1145	0.8739	0.1405	0.155	0.3648	0.1291	0.0938	0.1685	0.0425	0.1076	0.6926	0.0254	0.1232	0.8368	0.2043	0.1185	0.0847	0.1153	0.1047	0.271	-0.2657	0.1296	0.0404	0.1425	0.1622	0.3796	-0.7365	0.4686	0.116	0.0724	0.5232
839	45	nose (II)	0.0327	0.09	0.7165	0.0209	0.0901	0.8163	0.7167	1.1023	0.5156	0.0577	0.0926	0.5334	-0.118	0.2888	0.6828	0.1721	0.1263	0.1731	0.1063	0.164	0.517	-0.0635	0.1205	0.5983	0.1241	0.1193	0.2984	0.1192	0.1797	0.5069	0.0803	0.1195	0.5015	0.181	0.1107	0.102	0.1252	0.123	0.3086	0.149	0.1556	0.3382	0.0283	0.3788	0.9404	-0.351	0.6362
840	46	nose (II)	-0.0898	0.0954	0.3464	-0.0457	0.1159	0.6932	-0.7813	1.3385	0.5594	-0.0903	0.1006	0.3695	0.3108	0.3893	0.4247	0.1861	0.1848	0.314	-0.1616	0.2204	0.4635	-0.183	0.1487	0.2184	-0.0455	0.1411	0.7471	-0.0554	0.1975	0.7793	-0.0252	0.1735	0.8847	0.0393	0.1425	0.7825	0.1896	0.1797	0.2916	-0.2533	0.2156	0.2402	-0.1083	0.5027	0.8295	0.8247	0.9963
841	46	nose (II)	0.0589	0.057	0.3007	0.1254	0.082	0.1261	-0.0343	0.5789	0.9527	0.076	0.064	0.235	-0.2741	0.2705	0.3109	-0.0893	0.1082	0.4095	-0.0146	0.1505	0.9228	0.0101	0.0932	0.9137	-0.2262	0.0978	0.0207	-0.1169	0.1211	0.3342	-0.169	0.1177	0.1511	-0.0286	0.0926	0.7572	-0.1469	0.101	0.1458	-0.0416	0.154	0.7868	0.055	0.3308	0.8678	-0.769	0.807
842	46	nose (II)	-0.0246	0.0667	0.7117	-0.122	0.0924	0.1866	-0.0777	0.7747	0.9202	-0.0212	0.0716	0.7676	0.6293	0.3672	0.0866	0.0845	0.1293	0.5133	-0.1008	0.1752	0.565	-0.2027	0.1167	0.0824	0.1798	0.1141	0.115	0.0647	0.1415	0.6477	0.0002	0.1364	0.999	0.1148	0.1104	0.2983	0.0671	0.1206	0.5782	0.1298	0.1666	0.4358	0.4776	0.4035	0.2366	0.6397	0.8173
843	46	nose (II)	-0.0297	0.0915	0.7454	-0.0762	0.089	0.3917	-0.4783	0.9306	0.6073	-0.0321	0.0956	0.7367	0.125	0.2946	0.6714	0.1165	0.1335	0.3832	-0.0936	0.1721	0.5864	-0.1334	0.1176	0.2569	-0.0453	0.1077	0.6744	-0.0146	0.1768	0.9344	-0.0614	0.1234	0.619	-0.0047	0.1095	0.9656	0.0664	0.1302	0.6102	-0.1884	0.1848	0.3081	-0.1972	0.3875	0.6108	0.8642	0.9058
844	46	nose (II)	0.0965	0.0587	0.1004	-0.0804	0.0715	0.2609	0.1719	0.5797	0.7669	0.0852	0.0611	0.1629	0.3585	0.2505	0.1525	-0.0357	0.0992	0.7192	-0.038	0.1423	0.7892	-0.1578	0.0971	0.1043	0.0803	0.0942	0.3937	-0.0915	0.1196	0.4442	-0.0163	0.1059	0.8779	0.0231	0.0939	0.8057	-0.1943	0.1063	0.0674	0.0146	0.1336	0.9129	0.3048	0.3513	0.3856	-0.5433	0.6655
845	47	nose (II)	0.0835	0.0605	0.168	-0.0053	0.0692	0.9392	0.1335	0.5826	0.8188	0.0673	0.0637	0.2905	0.0222	0.2011	0.9121	0.172	0.0986	0.081	0.0433	0.139	0.7552	-0.1227	0.0919	0.1819	0.1547	0.0716	0.0307	-0.0046	0.1255	0.971	-0.1529	0.1019	0.1334	-0.0377	0.0856	0.6599	-0.0843	0.0995	0.3968	-0.1434	0.151	0.3422	0.2222	0.282	0.4307	0.0876	0.4442
846	47	nose (II)	-0.0439	0.075	0.558	-0.0353	0.1071	0.7416	-0.8559	1.365	0.5307	-0.0401	0.0831	0.6295	0.0542	0.3068	0.8597	0.3154	0.1606	0.0495	-0.001	0.1949	0.9961	-0.1109	0.135	0.4112	0.0425	0.1161	0.7141	-0.0423	0.161	0.7929	-0.0023	0.15	0.9878	0.1395	0.1315	0.2886	0.0751	0.1513	0.6196	-0.0884	0.1975	0.6546	0.7149	0.5879	0.224	-0.3822	0.7377
847	47	nose (II)	0.1153	0.0716	0.1076	-0.0072	0.0954	0.9399	0.5124	0.997	0.6073	0.0634	0.0715	0.3748	0.2606	0.3715	0.4829	-0.0549	0.1466	0.7079	0.057	0.1802	0.7515	-0.1205	0.1271	0.3431	0.0709	0.1015	0.4852	0.0263	0.1396	0.8506	-0.1978	0.1377	0.1508	-0.0899	0.1174	0.4437	-0.0708	0.1477	0.6316	-0.0926	0.177	0.6009	0.1346	0.3768	0.7208	0.0917	0.571
848	47	nose (II)	-0.0363	0.0589	0.5376	0.1117	0.0794	0.1593	0.0847	0.6638	0.8985	-0.0555	0.0616	0.368	-0.3166	0.2752	0.2499	-0.0309	0.1126	0.7839	0.089	0.1374	0.5173	0.2149	0.0962	0.0256	-0.1554	0.0906	0.0865	0.0232	0.1121	0.8357	0.1212	0.12	0.3125	-0.0867	0.0991	0.3819	0.0634	0.1013	0.5312	-0.0173	0.1466	0.9061	-0.0949	0.3289	0.7729	-0.4607	0.6692
849	48	lower face (III)	0.0532	0.0984	0.5888	0.1517	0.1349	0.2609	-0.3858	1.0691	0.7182	-0.08	0.1022	0.4338	-0.3453	0.4311	0.4231	-0.1758	0.1976	0.3737	0.0608	0.2415	0.8013	-0.2628	0.1962	0.1804	-0.0197	0.1394	0.8873	-0.133	0.206	0.5186	-0.1887	0.1766	0.2853	0.144	0.1664	0.3869	-0.1165	0.1811	0.52	-0.1933	0.2318	0.4044	-0.2377	0.5533	0.6675	-0.6872	0.9648
850	48	lower face (III)	0.0146	0.0778	0.8508	0.0279	0.1018	0.7845	-0.4833	0.9855	0.6238	0.0009	0.0763	0.9911	-0.3045	0.3599	0.3975	-0.2943	0.1793	0.1007	-0.0645	0.2165	0.7658	-0.2128	0.1564	0.1735	-0.1442	0.1266	0.2546	-0.2094	0.1822	0.2505	-0.2007	0.1569	0.2008	0.1251	0.1345	0.3523	-0.1247	0.1514	0.4101	-0.2148	0.1984	0.2789	0.1122	0.4528	0.8043	-0.2159	0.6935
851	48	lower face (III)	-0.1085	0.1147	0.344	0.028	0.1224	0.8193	0.641	1.3318	0.6303	-0.0433	0.1094	0.692	0.7818	0.6263	0.2119	0.514	0.3147	0.1024	0.4665	0.3187	0.1432	-0.0284	0.1757	0.8715	0.0825	0.1675	0.6221	-0.2126	0.2209	0.3358	0.0757	0.1946	0.6973	0.0012	0.1641	0.9944	-0.0062	0.1919	0.9743	0.0544	0.2565	0.8319	-0.3709	0.6222	0.5511	0.2923	0.8679
852	48	lower face (III)	0.0091	0.0591	0.8781	0.0372	0.0794	0.6391	-0.4436	0.84	0.5975	0.0589	0.0596	0.323	0.1517	0.2857	0.5955	0.0605	0.1027	0.5557	-0.0216	0.1482	0.8841	-0.0755	0.0974	0.4381	0.0662	0.0909	0.4663	0.1151	0.1254	0.3584	0.0984	0.1166	0.3989	0.0403	0.0947	0.6707	0.0099	0.1028	0.9236	0.0865	0.1374	0.5292	0.0427	0.3481	0.9023	-0.3334	0.5761
853	48	lower face (III)	-0.0808	0.0729	0.2682	0.1946	0.1055	0.065	0.0354	0.8162	0.9654	-0.0449	0.0663	0.4982	-0.1823	0.3379	0.5894	0.2381	0.1601	0.137	0.3522	0.1936	0.0689	-0.0594	0.1293	0.6461	-0.0727	0.109	0.5048	-0.2145	0.1584	0.1757	0.0451	0.1513	0.7656	0.0336	0.1168	0.7737	-0.0454	0.1387	0.7432	-0.0232	0.1852	0.9005	0.3103	0.4316	0.4722	0.6172	0.8765
854	48	lower face (III)	-0.3477	0.1164	0.0028	-0.1731	0.1202	0.1498	-0.6232	1.06	0.5566	-0.0968	0.0879	0.2707	0.1673	0.3132	0.5933	-0.1373	0.1583	0.3858	-0.0014	0.2058	0.9947	-0.0707	0.1381	0.6088	-0.0872	0.1332	0.5129	-0.1597	0.1595	0.3169	0.1019	0.1508	0.4994	-0.0776	0.1415	0.5834	0.1756	0.1558	0.2598	-0.0387	0.1913	0.8395	0.1864	0.4537	0.6812	0.1994	0.6877
855	48	lower face (III)	-0.0398	0.0611	0.5148	0.1121	0.0888	0.2067	-1.1634	1.5619	0.4563	0.0481	0.061	0.4305	-0.0267	0.2671	0.9204	0.0469	0.1108	0.6723	0.0925	0.148	0.5321	-0.0692	0.0903	0.4433	0.0918	0.0918	0.3171	0.0057	0.1149	0.9601	-0.0484	0.1075	0.6526	-0.0021	0.0952	0.9823	-0.0742	0.1104	0.5014	-0.1199	0.1456	0.4103	0.0249	0.352	0.9437	-0.0892	0.4908
856	48	lower face (III)	0.1226	0.0868	0.158	-0.0861	0.1165	0.46	0.9229	1.1986	0.4413	0.0681	0.0992	0.4925	-0.0142	0.3168	0.9642	-0.1172	0.1607	0.466	-0.0138	0.1616	0.932	-0.108	0.1368	0.43	-0.1648	0.119	0.1662	-0.1934	0.1853	0.2968	-0.1637	0.1612	0.3096	-0.0485	0.1337	0.7169	0.214	0.148	0.1483	0.1513	0.1949	0.4376	-0.2536	0.4344	0.5594	-0.0178	0.6562
857	48	lower face (III)	-0.0149	0.1217	0.9028	-0.1833	0.1532	0.2317	0.3842	1.3804	0.7808	0.0491	0.1236	0.6913	-0.2625	0.5279	0.619	-0.1756	0.2161	0.4165	-0.3465	0.3447	0.3148	0.1868	0.2093	0.3721	0.1517	0.1993	0.4467	0.4706	0.2998	0.1164	0.1706	0.2603	0.5124	-0.1763	0.1896	0.3524	0.2152	0.2997	0.4727	0.2324	0.3306	0.4822	-0.421	0.7731	0.586	1.1902	1.54
858	49	lower face (III)	-0.112	0.07	0.1095	-0.0343	0.1007	0.7334	-0.6282	1.0623	0.5543	-0.0207	0.0752	0.7835	-0.1852	0.3339	0.5791	-0.0142	0.1369	0.9173	-0.1981	0.1923	0.3031	-0.009	0.135	0.9466	0.0979	0.1115	0.38	0.0366	0.1497	0.807	0.1963	0.1435	0.1713	0.1725	0.1231	0.1614	-0.3502	0.1434	0.0146	-0.2431	0.1753	0.1655	0.5487	0.5113	0.2832	-0.7007	0.8981
859	49	lower face (III)	-0.1561	0.0793	0.049	0.0157	0.1179	0.8941	-1.0951	1.4892	0.4621	-0.0664	0.0788	0.3995	0.1055	0.2992	0.7244	-0.0054	0.1352	0.9682	-0.0918	0.202	0.6495	0.0201	0.1144	0.8607	-0.1437	0.1241	0.2468	-0.1585	0.1382	0.2515	-0.0905	0.1386	0.5136	0.022	0.1246	0.8597	-0.1207	0.1344	0.3691	-0.1668	0.1694	0.3248	0.3026	0.4434	0.4949	0.0915	0.558
860	49	lower face (III)	0.0215	0.0645	0.7392	-0.0317	0.084	0.7056	-0.6758	1.0208	0.5079	0.0722	0.0649	0.2657	-0.0303	0.2636	0.9086	-0.1581	0.1261	0.2097	-0.1378	0.1761	0.4337	0.096	0.1009	0.3414	-0.1635	0.1007	0.1042	-0.0103	0.1231	0.9331	-0.0271	0.1193	0.8205	-0.0788	0.1067	0.4601	0.0908	0.124	0.4641	-0.0995	0.1324	0.4524	0.098	0.3978	0.8055	0.1501	0.5429
861	49	lower face (III)	-0.0144	0.0699	0.8371	-0.0549	0.0949	0.5631	0.0731	0.6441	0.9097	-0.0381	0.0827	0.6449	-0.0082	0.2666	0.9754	0.0953	0.1134	0.401	-0.0514	0.1692	0.7611	-0.1285	0.1129	0.2548	-0.0914	0.0974	0.348	-0.2905	0.1495	0.052	-0.1703	0.1274	0.1813	0.1137	0.1065	0.2857	-0.0636	0.1126	0.5721	-0.0337	0.1619	0.8353	0.3284	0.4238	0.4385	0.1169	0.5613
862	49	lower face (III)	-0.0595	0.0613	0.3314	0.0495	0.0941	0.5989	-0.56	1.0012	0.5759	-0.1265	0.0703	0.0721	0.0239	0.3602	0.9471	0.0947	0.1618	0.5581	0.1567	0.1819	0.3888	-0.0018	0.1247	0.9888	-0.073	0.1227	0.5518	0.013	0.1558	0.9333	0.1569	0.1478	0.2882	-0.0844	0.123	0.4927	0.1299	0.1501	0.3869	-0.0698	0.1908	0.7146	-0.229	0.4526	0.6129	-0.4292	0.6897
863	49	lower face (III)	-0.0429	0.1209	0.723	-0.0287	0.1426	0.8403	-0.4887	1.1895	0.6812	0.1075	0.1301	0.4086	0.1623	0.4763	0.7332	-0.0181	0.1941	0.9258	0.1423	0.2576	0.5805	-0.1288	0.2051	0.5301	0.1781	0.1574	0.2577	0.2586	0.2386	0.2785	-0.1149	0.2056	0.5764	0.0528	0.1715	0.7581	-0.0745	0.1933	0.7001	-0.0249	0.2191	0.9096	0.4143	0.6114	0.4981	0.109	0.9333
864	50	lower face (III)	-0.1549	0.1021	0.1292	0.252	0.1371	0.0661	-0.7224	1.1972	0.5463	-0.0517	0.0918	0.5731	0.1939	0.3685	0.5988	-0.1887	0.1919	0.3255	-0.0097	0.2108	0.9632	-0.1966	0.1705	0.2489	-0.0849	0.1493	0.5696	0.0257	0.1626	0.8746	-0.1536	0.1838	0.4032	0.0714	0.1473	0.6279	0.049	0.1592	0.7581	-0.3267	0.2584	0.2061	-0.2892	0.5023	0.5647	-0.0443	0.7696
865	50	lower face (III)
866	50	lower face (III)	0.0175	0.129	0.8921	-0.1924	0.1881	0.3064	-1.8296	2.6309	0.4868	0.0576	0.1372	0.6747	-0.5194	0.6355	0.4138	-0.3639	0.2759	0.1872	0.0897	0.2783	0.7471	-0.3478	0.2445	0.1549	-0.213	0.2107	0.312	-0.3624	0.27	0.1796	-0.1375	0.2353	0.559	-0.3536	0.2728	0.195	0.0996	0.2571	0.6985	0.0847	0.2591	0.7437	0.3505	0.6942	0.6137	-0.6715	1.1594
867	50	lower face (III)	0.0605	0.0619	0.3286	-0.155	0.0832	0.0626	0.2195	0.6537	0.7371	-0.0303	0.0668	0.65	-0.5056	0.2848	0.0759	-0.1266	0.1174	0.2807	0.0041	0.155	0.979	-0.1591	0.0982	0.1051	-0.0498	0.1008	0.6213	0.1127	0.1205	0.3494	-0.1245	0.1271	0.3273	-0.0247	0.0989	0.8031	0.1174	0.1228	0.3391	0.0739	0.1579	0.6398	-0.0156	0.344	0.9638	0.2294	0.59
868	50	lower face (III)	-0.0517	0.0561	0.3566	-0.0262	0.082	0.7488	0.6014	0.987	0.5423	-0.0404	0.0643	0.5299	-0.3004	0.3062	0.3266	-0.1619	0.1215	0.1826	0.1542	0.1506	0.3059	-0.2041	0.1092	0.0615	-0.0005	0.0941	0.9958	0.0367	0.1106	0.7399	-0.0939	0.1221	0.442	-0.1271	0.0958	0.1844	-0.0995	0.1225	0.4164	0.0234	0.1437	0.8705	-0.0516	0.3461	0.8814	-0.3437	0.5639
869	50	lower face (III)	-0.0763	0.0969	0.4314	0.0841	0.1107	0.4478	0.2498	0.887	0.7782	0.0243	0.0837	0.7712	0.147	0.3804	0.6991	0.0091	0.1566	0.9537	-0.2027	0.2388	0.3958	-0.0621	0.1526	0.6839	-0.0429	0.1516	0.7769	0.0309	0.1898	0.8706	-0.2176	0.1838	0.2364	0.1576	0.1606	0.3266	0.0732	0.1566	0.6402	-0.1201	0.2074	0.5625	-0.562	0.5404	0.2984	-0.7997	1.0192
870	50	lower face (III)	0.0354	0.0956	0.7116	-0.0036	0.1074	0.9732	-1.6613	2.21	0.4522	0.0427	0.097	0.6601	0.0753	0.4056	0.8528	0.1208	0.1626	0.4576	0.1825	0.2096	0.3839	0.0652	0.1532	0.6706	0.0786	0.1391	0.5721	0.0603	0.169	0.7211	0.117	0.1617	0.4694	0.0094	0.1388	0.9462	0.0439	0.1632	0.788	-0.1068	0.2014	0.5958	0.4033	0.5892	0.4937	-0.1575	0.7115
871	50	lower face (III)	0.1437	0.1309	0.2724	-0.0102	0.1513	0.946	0.1783	1.2109	0.883	0.1291	0.1213	0.2869	0.5229	0.57	0.3589	0.109	0.2063	0.5973	-0.055	0.2844	0.8466	0.0226	0.1855	0.9028	-0.0469	0.1853	0.8004	0.1951	0.2287	0.3937	-0.1653	0.2293	0.471	0.3561	0.2633	0.1762	-0.4041	0.3097	0.1919	-0.3371	0.3415	0.3236	-0.566	0.6673	0.3963	-0.4187	0.9402
872	50	lower face (III)	-0.0288	0.1162	0.8046	-0.0325	0.1421	0.8193	1.0575	1.4918	0.4784	-0.1265	0.1098	0.2493	0.348	0.4135	0.4	0.2931	0.2132	0.1692	0.3814	0.286	0.1824	0.391	0.1823	0.032	0.3572	0.2005	0.0748	0.5145	0.2779	0.0641	0.3548	0.2196	0.1062	0.1345	0.1784	0.4508	0.064	0.176	0.7163	0.148	0.2432	0.5429	-0.0818	0.4946	0.8686	1.383	1.4061
873	50	lower face (III)	-0.0023	0.0639	0.9715	-0.1563	0.0851	0.0663	0.1372	0.7443	0.8537	-0.0368	0.0707	0.6021	-0.1402	0.3128	0.6541	-0.1668	0.1317	0.2051	0.1143	0.1558	0.463	-0.1779	0.1054	0.0916	-0.2969	0.1084	0.0062	-0.2565	0.1241	0.0387	-0.2572	0.1229	0.0364	-0.2052	0.1098	0.0617	0.0986	0.1326	0.4568	0.0799	0.1384	0.564	0.1993	0.3399	0.5577	-0.1919	0.6043
874	50	lower face (III)	0.0644	0.086	0.4536	-0.0979	0.1272	0.4418	-0.6959	1.1638	0.5499	0.058	0.0824	0.4817	-0.3834	0.3853	0.3198	0.0784	0.1491	0.5988	-0.005	0.2124	0.9813	0.0988	0.1405	0.4818	0.088	0.1264	0.4863	-0.149	0.1878	0.4274	0.075	0.1541	0.6265	-0.0702	0.1516	0.6433	0.2181	0.1559	0.1619	0.2515	0.2275	0.269	0.3019	0.5373	0.5742	0.1061	0.8083
875	51	lower face (III)	0.0398	0.0861	0.6436	0.0614	0.0915	0.502	0.7406	1.1297	0.5121	0.069	0.0808	0.3933	0.1765	0.3442	0.6081	0.1571	0.1471	0.2854	-0.1204	0.2025	0.5522	-0.0539	0.1213	0.6567	-0.006	0.1205	0.9606	-0.005	0.1509	0.9736	-0.1122	0.1615	0.4874	0.1138	0.119	0.3389	0.0711	0.1442	0.6218	-0.2937	0.1695	0.083	-0.4196	0.4443	0.345	0.1966	0.575
876	51	lower face (III)	-0.0629	0.0668	0.3463	0.185	0.0834	0.0266	-0.1262	0.6315	0.8415	-0.0088	0.0683	0.8969	0.3039	0.2896	0.2939	0.0887	0.121	0.4636	-0.1739	0.162	0.2831	0.096	0.1075	0.3717	-0.0165	0.0945	0.8615	0.0288	0.1258	0.8191	-0.0435	0.1287	0.7355	0.0824	0.0986	0.4031	-0.1115	0.1124	0.3209	-0.1778	0.1583	0.2613	-0.1089	0.3199	0.7335	0.1475	0.5284
877	51	lower face (III)	0.1122	0.0675	0.0966	0.0593	0.0912	0.5155	-0.6765	1.0016	0.4994	0.0549	0.0676	0.4168	0.1078	0.2812	0.7015	0.031	0.1104	0.7789	-0.1141	0.162	0.4811	-0.0678	0.1109	0.5406	0.1541	0.1032	0.1353	-0.0071	0.1191	0.9525	-0.1818	0.112	0.1045	0.1837	0.1054	0.0815	-0.0284	0.1073	0.7915	0.1084	0.1472	0.4616	-0.2083	0.3679	0.5714	0.3241	0.5498
878	51	lower face (III)	0.0515	0.0615	0.4024	-0.0874	0.0937	0.351	0.5614	0.8399	0.5039	0.0611	0.0673	0.3644	0.0446	0.29	0.8777	0.0937	0.1246	0.452	0.1226	0.173	0.4787	0.0965	0.1049	0.3576	-0.1644	0.1115	0.1403	-0.2329	0.146	0.1107	-0.0825	0.1306	0.5275	-0.0463	0.1148	0.6868	-0.19	0.1264	0.1328	-0.0645	0.1679	0.7008	0.2543	0.3999	0.5249	0.3597	0.5723
879	51	lower face (III)	-0.0073	0.0794	0.9266	-0.2033	0.133	0.1265	0.5061	0.9643	0.5997	0.0139	0.0841	0.8689	-0.2601	0.3609	0.4711	0.1541	0.1695	0.3633	0.2841	0.2265	0.2098	0.0762	0.1497	0.6105	-0.1488	0.1332	0.2639	-0.1792	0.1738	0.3024	0.0547	0.1539	0.7224	-0.0508	0.1507	0.7363	-0.1339	0.1611	0.406	0.0469	0.1936	0.8086	0.6458	0.5708	0.2579	0.3838	0.7531
880	51	lower face (III)	0.1041	0.0593	0.0793	0.0574	0.0786	0.4654	0.047	0.5811	0.9356	0.0148	0.0588	0.8014	0.1811	0.2369	0.4446	-0.149	0.1141	0.1916	-0.0965	0.1495	0.5186	-0.0119	0.0907	0.8955	-0.0993	0.0955	0.2986	-0.0673	0.1131	0.5514	-0.138	0.1105	0.2117	-0.1988	0.1032	0.0541	0.0475	0.1032	0.6453	-0.0734	0.1386	0.5965	-0.4648	0.4059	0.2522	-0.3539	0.5771
881	51	lower face (III)	-0.0081	0.0699	0.9077	0.048	0.0893	0.5909	-1.5452	1.9176	0.4204	0.0103	0.075	0.8907	-0.0233	0.2719	0.9317	-0.0727	0.1318	0.5814	-0.0879	0.154	0.568	0.0086	0.1086	0.9369	0.1313	0.1107	0.2353	0.0355	0.1273	0.7803	0.0927	0.1151	0.4204	0.1964	0.1112	0.0772	0.1262	0.1189	0.2886	-0.1442	0.1673	0.3887	-0.0116	0.3509	0.9736	0.1486	0.5337
882	51	lower face (III)	-0.098	0.0625	0.1169	-0.1191	0.0839	0.1557	1.6858	2.0643	0.4141	-0.0929	0.0633	0.1424	0.0422	0.2593	0.8708	0.0718	0.1178	0.5423	0.1238	0.1573	0.4313	-0.0254	0.1106	0.8184	-0.0847	0.1005	0.3994	-0.0476	0.1289	0.7118	0.04	0.1098	0.7156	0.0264	0.0967	0.7849	-0.0694	0.1173	0.5541	-0.0875	0.1395	0.5303	0.5003	0.3724	0.1791	-0.0265	0.4478
883	51	lower face (III)	-0.0102	0.0681	0.8805	-0.1156	0.0858	0.178	0.9511	1.2782	0.4568	-0.0593	0.0662	0.3698	-0.3835	0.3102	0.2163	0.0622	0.136	0.6473	0.2942	0.1831	0.1081	0.1572	0.1199	0.1896	-0.0519	0.1113	0.6412	0.0532	0.118	0.6519	0.1072	0.1321	0.4174	0.0144	0.1024	0.8885	-0.0934	0.1297	0.4712	0.204	0.1526	0.1813	-0.2039	0.3727	0.5843	0.0523	0.5545
884	51	lower face (III)	-0.1067	0.092	0.2461	0.0365	0.1178	0.7568	0.3935	0.9204	0.669	-0.0543	0.0875	0.5347	0.2704	0.3959	0.4947	0.0815	0.1582	0.6065	-0.2309	0.2064	0.2632	-0.0101	0.144	0.944	-0.2578	0.1543	0.0948	0.0354	0.1823	0.8459	0.1007	0.1644	0.5402	-0.118	0.1466	0.4207	0.0009	0.1608	0.9953	-0.452	0.2304	0.0498	0.5695	0.5643	0.3128	-0.3197	0.7277
885	51	lower face (III)	-0.0375	0.072	0.6022	0.0162	0.0952	0.8652	0.1833	0.6828	0.7884	-0.0396	0.0798	0.6197	-0.2959	0.3241	0.3613	-0.071	0.1419	0.6168	0.1451	0.204	0.4768	0.2274	0.1338	0.0892	-0.2097	0.1308	0.1089	-0.0227	0.1478	0.8777	0.0456	0.1413	0.7468	-0.0196	0.1184	0.8688	-0.0638	0.1326	0.6305	-0.1426	0.177	0.4204	-0.4024	0.4005	0.315	0.0067	0.5914
886	52	lower face (III)	-0.0087	0.0991	0.9298	0.1871	0.149	0.2092	-0.2554	0.9462	0.7873	-0.1019	0.103	0.3227	-0.3173	0.466	0.4959	0.1264	0.1783	0.4784	-0.1458	0.2586	0.573	0.0921	0.1588	0.562	-0.1252	0.1575	0.4266	-0.0513	0.21	0.8071	0.0143	0.1979	0.9422	0.026	0.1602	0.8712	-0.1744	0.1796	0.3313	-0.4354	0.2937	0.1383	0.4785	0.5735	0.404	0.037	0.8315
887	52	lower face (III)	-0.0575	0.0674	0.3937	0.1426	0.097	0.1413	0.3724	0.8296	0.6535	-0.1653	0.0784	0.0349	-0.0107	0.3029	0.9719	0.1543	0.1381	0.2638	0.0829	0.1546	0.5918	0.0042	0.1127	0.97	-0.0527	0.1092	0.6294	0.071	0.1267	0.5754	-0.0409	0.1148	0.7215	0.1331	0.1055	0.2069	-0.0605	0.1299	0.6414	-0.2455	0.1476	0.0962	0.3884	0.4131	0.3472	-0.5135	0.6695
888	52	lower face (III)	0.0021	0.0561	0.9703	0.0324	0.0797	0.6849	1.0279	1.3625	0.4506	-0.0566	0.0629	0.3683	0.0785	0.3042	0.7962	0.1954	0.1282	0.1276	0.1255	0.1733	0.4689	0.1035	0.1057	0.3275	-0.0104	0.1039	0.9199	0.0572	0.1341	0.6697	-0.0057	0.1124	0.9599	-0.0612	0.1127	0.5873	-0.1372	0.1248	0.2714	-0.0191	0.1582	0.9037	0.2551	0.4022	0.5258	-0.1134	0.5133
889	52	lower face (III)	0.0486	0.1306	0.7096	-0.0379	0.203	0.852	0.6594	1.6519	0.6898	0.0906	0.1348	0.5014	0.5256	0.7753	0.4979	0.3718	0.4124	0.3673	0.3858	0.4335	0.3735	0.1415	0.2666	0.5957	0.0413	0.2908	0.8871	0.2232	0.3678	0.5439	0.0242	0.281	0.9314	-0.4564	0.5272	0.3867	0.3264	0.4277	0.4454	0.2963	0.4847	0.541	-0.0768	0.7799	0.9216	0.5893	1.27
890	52	lower face (III)	-0.0359	0.0633	0.5704	-0.0337	0.0785	0.6675	-0.5184	0.896	0.5629	-0.0326	0.0642	0.6112	-0.2353	0.2827	0.4052	-0.0218	0.1223	0.8586	0.0353	0.1462	0.8093	0.0459	0.0925	0.6198	0.0744	0.0955	0.4362	0.0771	0.134	0.5653	0.1553	0.1169	0.1841	0.0077	0.1037	0.9407	0.1909	0.1121	0.0887	-0.0685	0.1576	0.6637	-0.1173	0.3621	0.746	0.7258	0.7918
891	52	lower face (III)	0.0891	0.0682	0.1916	-0.0048	0.0883	0.9571	0.4107	0.7508	0.5844	-0.0452	0.0717	0.5283	0.3302	0.3093	0.2857	0.2869	0.1437	0.0458	0.1911	0.1687	0.2571	0.0283	0.121	0.8153	0.1158	0.115	0.3143	0.2103	0.1585	0.1846	0.0453	0.1332	0.7338	0.1397	0.1161	0.229	0.1223	0.1268	0.3348	0.1385	0.1707	0.417	-0.0338	0.3995	0.9326	-0.3378	0.6731
892	52	lower face (III)	-0.036	0.087	0.6793	0.1155	0.0834	0.1658	0.3209	0.7785	0.6802	-0.0217	0.094	0.817	-0.0874	0.2682	0.7445	-0.0339	0.1188	0.7754	-0.0599	0.1525	0.6942	0.1092	0.1221	0.3712	-0.0774	0.1056	0.4635	-0.0329	0.1911	0.8633	-0.0404	0.1238	0.7443	-0.1496	0.0992	0.1314	-0.1183	0.1148	0.3029	-0.2375	0.1578	0.1324	0.1373	0.3228	0.6706	0.0709	0.5733
893	52	lower face (III)	0.1501	0.0811	0.0642	-0.1488	0.0967	0.124	-0.1596	0.7845	0.8388	-0.0343	0.0706	0.6274	-0.0464	0.3303	0.8883	0.0641	0.1299	0.6219	-0.1089	0.1886	0.5635	-0.0101	0.0993	0.9189	0.1302	0.1174	0.2674	0.2013	0.1764	0.254	0.1141	0.1356	0.4	0.2357	0.1257	0.0606	0.0294	0.1376	0.831	-0.0992	0.1915	0.6043	-0.0425	0.3585	0.9056	-0.3955	0.6799
894	52	lower face (III)	0.1015	0.0835	0.2244	0.0633	0.1047	0.5454	-0.2993	0.8819	0.7343	-0.0299	0.075	0.6903	-0.0803	0.3368	0.8115	0.1502	0.1481	0.3106	0.0698	0.187	0.7092	-0.0579	0.1208	0.6318	-0.1396	0.1252	0.265	0.1537	0.1672	0.3581	-0.1206	0.1431	0.3993	-0.1114	0.1217	0.3599	0.1202	0.1384	0.3852	-0.1609	0.1779	0.3658	0.2128	0.4482	0.635	-0.0275	0.638
895	52	lower face (III)	-0.0972	0.0867	0.2624	-0.1217	0.1153	0.2912	0.2305	0.8359	0.7827	-0.0903	0.0871	0.2999	-0.3054	0.3402	0.3693	0.0117	0.1622	0.9426	-0.1466	0.2052	0.4748	0.0869	0.1325	0.5119	0.072	0.1185	0.5436	-0.0594	0.1548	0.7009	0.1641	0.1448	0.2568	0.0655	0.1329	0.622	-0.1787	0.1565	0.2534	-0.0788	0.1914	0.6806	0.1708	0.4153	0.6809	-0.0474	0.6655
896	52	lower face (III)	0.0656	0.1268	0.605	0.0504	0.1594	0.7519	0.2443	1.1224	0.8277	-0.0903	0.1229	0.4624	0.1609	0.5378	0.7648	0.3234	0.2959	0.2745	0.4969	0.4245	0.2418	0.1398	0.2233	0.5313	0.3097	0.2594	0.2324	0.1035	0.2426	0.6698	0.087	0.2128	0.6828	0.3158	0.2828	0.2641	0.2013	0.2385	0.3987	0.1835	0.2802	0.5125	-0.0549	0.5567	0.9214	-0.6732	1.2003
897	53	lower face (III)	-0.0313	0.0592	0.5976	0.0504	0.0784	0.5202	0.1483	0.6422	0.8173	-0.0462	0.0708	0.5143	-0.0425	0.2836	0.881	-0.0314	0.1155	0.7857	-0.2388	0.1726	0.1664	-0.0809	0.1041	0.437	-0.005	0.0948	0.9579	0.13	0.1224	0.2881	0.0858	0.109	0.431	0.041	0.0933	0.6601	-0.094	0.1153	0.4149	-0.1753	0.1534	0.2531	0.1047	0.2918	0.7198	-1.078	1.0403
898	53	lower face (III)	-0.0129	0.0613	0.8335	-0.0784	0.0796	0.3249	-0.1459	0.6121	0.8116	-0.0596	0.0654	0.3623	0.2707	0.2778	0.3298	-0.0223	0.1146	0.8458	-0.0329	0.1689	0.8456	0.0077	0.1155	0.9472	0.0438	0.1113	0.6939	-0.0352	0.14	0.8016	0.184	0.1207	0.1276	0.0602	0.1006	0.5497	0.107	0.1374	0.4361	-0.128	0.1449	0.3769	-0.3962	0.3816	0.2992	-0.256	0.6386
899	53	lower face (III)	0.0117	0.0844	0.8898	0.1417	0.1089	0.1932	-0.4603	1.0723	0.6677	0.0452	0.0939	0.6298	-0.2762	0.3967	0.4863	-0.0433	0.1569	0.7826	-0.2919	0.2455	0.2344	0.0422	0.1368	0.7578	-0.0983	0.1352	0.4672	-0.0372	0.1863	0.8418	-0.0624	0.1528	0.6829	0.0141	0.1195	0.906	0.1202	0.1676	0.4734	-0.1154	0.2089	0.5805	-0.5061	0.5142	0.325	0.0696	0.6806
900	53	lower face (III)	-0.0021	0.0779	0.9786	0.1939	0.1001	0.0527	-0.2355	0.8017	0.7689	0.019	0.0701	0.786	-0.2255	0.2724	0.4079	0.0186	0.1208	0.8776	-0.0573	0.1666	0.7311	-0.0114	0.1073	0.9156	-0.0107	0.1018	0.9166	0.1722	0.1452	0.2354	-0.1267	0.1196	0.2893	-0.0816	0.101	0.4195	-0.0317	0.1221	0.7951	-0.0734	0.149	0.6222	0.4773	0.4073	0.2412	-0.0363	0.5496
901	53	lower face (III)	0.059	0.0691	0.3934	-0.0753	0.0754	0.3181	0.4795	0.7965	0.5471	0.053	0.0694	0.4452	0.112	0.2391	0.6394	0.0479	0.1088	0.6594	0.1328	0.1546	0.3904	0.0317	0.098	0.7464	0.0046	0.0786	0.9534	-0.1504	0.1202	0.2107	-0.1175	0.1148	0.3059	0.0683	0.0912	0.4543	-0.0371	0.099	0.7082	-0.0102	0.1438	0.9433	-0.0674	0.2986	0.8214	0.5049	0.6586
902	53	lower face (III)	0.0702	0.0639	0.2719	-0.0713	0.0835	0.393	-0.0441	0.6521	0.9461	0.0028	0.0652	0.9655	0.0766	0.2796	0.7841	0.1041	0.1097	0.3426	-0.0535	0.1606	0.7392	-0.0398	0.1025	0.6982	0.114	0.1006	0.257	0.0878	0.1253	0.4831	0.0967	0.1263	0.4441	0.0843	0.0966	0.3829	-0.075	0.1111	0.4997	0.1209	0.134	0.3669	0.2603	0.368	0.4793	-0.5669	0.6733
903	53	lower face (III)	-0.0358	0.0791	0.6508	0.0498	0.1007	0.6209	0.0598	0.7394	0.9355	-0.1081	0.0846	0.2014	0.5189	0.3953	0.1893	0.2007	0.1514	0.1848	0.2637	0.2115	0.2125	0.0731	0.1244	0.5567	0.2037	0.1373	0.138	0.2277	0.1762	0.1963	0.2828	0.1551	0.0682	-0.0278	0.1243	0.8231	0.0641	0.1614	0.6912	-0.069	0.1888	0.7147	0.0814	0.4031	0.8399	0.0335	0.6046
904	53	lower face (III)	-0.0003	0.0678	0.997	-0.0331	0.0801	0.679	0.115	0.6588	0.8614	-0.0391	0.0703	0.5779	0.4853	0.2957	0.1008	0.1215	0.1213	0.3168	0.0403	0.1567	0.797	-0.1185	0.1032	0.2509	0.0971	0.1038	0.3496	-0.2073	0.1409	0.1413	-0.0166	0.127	0.8962	0.1691	0.1082	0.1182	-0.152	0.1214	0.2106	0.1539	0.1464	0.2933	-0.0834	0.3368	0.8045	0.0569	0.5065
905	53	lower face (III)	0.0006	0.0578	0.9919	0.1058	0.0731	0.1475	0.4017	0.7474	0.591	-0.0326	0.0605	0.5901	0.0705	0.2468	0.7751	0.0508	0.1045	0.6265	-0.0957	0.1431	0.5037	0.0744	0.0938	0.428	0.0417	0.0817	0.6091	0.1257	0.1033	0.2237	0.111	0.0989	0.262	0.0942	0.0812	0.2461	0.0511	0.0961	0.5947	-0.217	0.1309	0.0974	-0.237	0.3298	0.4723	-0.1639	0.4322
906	54	lower face (III)	0.0114	0.118	0.9231	0.0675	0.1447	0.6409	-1.2574	1.95	0.519	0.033	0.1098	0.7635	0.1203	0.4692	0.7977	0.0536	0.1974	0.786	0.3434	0.3634	0.3446	0.1121	0.1972	0.5698	0.0532	0.1876	0.7767	-0.1906	0.3111	0.5401	-0.2642	0.3344	0.4294	-0.008	0.1931	0.9668	0.4041	0.3751	0.2813	0.4064	0.4134	0.3255	-0.0486	0.5453	0.929	0.4719	1.1018
907	54	lower face (III)	0.0208	0.1124	0.8533	-0.0362	0.1357	0.7895	0.6712	1.5176	0.6583	0.0341	0.1156	0.7681	-0.1172	0.5794	0.8397	-0.1237	0.2343	0.5975	-0.1847	0.2945	0.5306	-0.1388	0.1935	0.4733	0.0816	0.1957	0.6766	-0.3182	0.3349	0.3421	-0.2338	0.2535	0.3563	-0.0578	0.193	0.7646	0.2768	0.2637	0.2939	-0.1311	0.2595	0.6135	0.7167	0.9515	0.4513	1.2486	1.6397
908	54	lower face (III)	0.0294	0.0845	0.7279	-0.1696	0.1339	0.2055	-0.3815	0.9558	0.6898	-0.1062	0.0855	0.2139	-0.2185	0.368	0.5527	0.1399	0.1524	0.3589	-0.0424	0.1693	0.8021	0.2494	0.1591	0.117	-0.123	0.1281	0.3369	0.1033	0.1677	0.5379	0.3976	0.2104	0.0588	-0.2873	0.1557	0.065	-0.2429	0.1586	0.1256	0.0417	0.1689	0.805	-0.2202	0.4682	0.6381	-0.197	0.7422
909	54	lower face (III)	-0.1204	0.1338	0.368	0.0874	0.1562	0.5758	0.0052	1.0589	0.9961	-0.0703	0.1343	0.6005	-0.677	0.6233	0.2775	-0.0496	0.2484	0.8419	0.2686	0.3396	0.429	0.1689	0.2249	0.4526	0.1883	0.2485	0.4485	0.0619	0.2606	0.8123	0.1068	0.2609	0.6822	0.1512	0.2289	0.5088	-0.0192	0.2259	0.9324	0.2288	0.299	0.4442	-1.1023	0.9694	0.2555	-0.1636	0.9352
910	54	lower face (III)	-0.0612	0.0721	0.3963	0.0436	0.0972	0.6539	0.6505	1.037	0.5305	-0.0496	0.0776	0.5228	0.1048	0.34	0.7579	0.0784	0.1438	0.5856	-0.2123	0.1845	0.2499	-0.3176	0.1337	0.0176	0.0064	0.1151	0.9557	-0.1139	0.1492	0.4451	-0.2508	0.1443	0.0822	0.2667	0.1268	0.0355	-0.1881	0.122	0.1231	-0.3882	0.1672	0.0203	0.6821	0.5539	0.2182	-0.497	0.7089
911	54	lower face (III)	0.023	0.0928	0.8041	-0.0628	0.1194	0.5992	-0.6927	1.1381	0.5428	0.0627	0.0885	0.4786	0.229	0.4165	0.5824	-0.1935	0.1712	0.2584	0.0097	0.2041	0.962	0.1598	0.1623	0.3247	-0.0556	0.143	0.6976	-0.0121	0.1637	0.9411	0.0921	0.179	0.6069	-0.2597	0.1609	0.1065	0.2423	0.1727	0.1606	0.3147	0.2363	0.183	0.0738	0.499	0.8825	0.9025	1.0348
912	54	lower face (III)	0.0922	0.06	0.1246	0.0193	0.0688	0.7791	0.4096	0.6093	0.5014	0.0092	0.0562	0.8705	-0.3777	0.2727	0.166	0.0488	0.1012	0.6299	0.1164	0.1354	0.39	-0.0006	0.0834	0.9944	0.0223	0.0778	0.7747	-0.0256	0.1073	0.8116	-0.0844	0.1054	0.4233	0.0506	0.0719	0.4815	-0.1107	0.0936	0.2372	-0.1553	0.1412	0.2712	0.0762	0.2776	0.7837	-0.3707	0.581
913	54	lower face (III)	0.0899	0.0745	0.2271	-0.1427	0.0888	0.1082	-0.5165	0.8991	0.5656	0.0057	0.0727	0.9379	-0.3547	0.3086	0.2504	0.0534	0.1317	0.6852	-0.0873	0.1717	0.6111	0.0664	0.1164	0.5683	-0.1492	0.1229	0.2247	-0.3114	0.1392	0.0252	-0.1234	0.1361	0.3646	-0.0818	0.1191	0.4922	0.013	0.1388	0.9255	-0.2276	0.1744	0.1919	0.1591	0.4034	0.6933	0.0535	0.5926
914	55	lower face (III)	-0.2334	0.1056	0.0271	0.0379	0.1179	0.7475	-1.5556	1.9927	0.435	-0.1561	0.0954	0.1018	-0.6704	0.4655	0.1498	-0.0224	0.1964	0.9092	-0.1003	0.2518	0.6904	-0.0288	0.1685	0.8641	0.0223	0.146	0.8787	0.0241	0.1789	0.8926	-0.0845	0.1869	0.6511	-0.0377	0.1557	0.8088	-0.06	0.194	0.7571	0.2011	0.2378	0.3978	-0.0673	0.5426	0.9014	0.1907	0.8126
915	55	lower face (III)
916	55	lower face (III)	-0.0201	0.0816	0.8058	-0.0283	0.1037	0.785	-0.5038	0.932	0.5888	-0.0212	0.0752	0.7776	-0.1165	0.361	0.7469	0.1285	0.1413	0.3631	0.1069	0.1769	0.5454	-0.0467	0.1278	0.7147	-0.0433	0.1207	0.7198	-0.1622	0.1419	0.2531	-0.1214	0.1361	0.3723	0.2533	0.1403	0.0711	-0.133	0.1321	0.3138	-0.1932	0.1563	0.2164	-0.3032	0.413	0.4629	-0.1714	0.6111
917	55	lower face (III)	0.0398	0.0869	0.6469	0.0964	0.1198	0.4208	-1.6759	2.1358	0.4326	-0.0105	0.0828	0.8991	-0.7022	0.4607	0.1275	0.0291	0.1635	0.8589	-0.0052	0.2238	0.9813	0.0035	0.1546	0.9819	-0.0069	0.1424	0.9616	0.168	0.1743	0.3351	0.0465	0.1664	0.78	0.0698	0.1347	0.6044	-0.0975	0.1665	0.5583	0.1554	0.2177	0.4753	0.3259	0.5103	0.5231	0.2209	0.7546
918	55	lower face (III)	0.0215	0.0631	0.7339	0.0052	0.0721	0.9429	0.8015	1.0466	0.4438	0.0417	0.0611	0.4949	0.4704	0.2918	0.1069	0.1444	0.1165	0.2154	0.0197	0.1362	0.8851	0.1302	0.094	0.1658	0.0791	0.0865	0.3605	0.0185	0.1207	0.8785	0.2541	0.1138	0.0255	0.1055	0.0942	0.2626	0.054	0.1157	0.6409	0.0336	0.1359	0.8046	-0.2447	0.3708	0.5094	0.4685	0.6294
919	55	lower face (III)	0.0314	0.0901	0.7272	-0.1205	0.1088	0.2679	-0.6442	1.2016	0.5919	-0.0144	0.0929	0.8771	0.0017	0.3263	0.9959	-0.0067	0.1494	0.964	0.0263	0.1907	0.8904	-0.1034	0.1467	0.4809	-0.0555	0.1427	0.6975	-0.2421	0.1689	0.1519	-0.1993	0.1563	0.2021	0.059	0.1421	0.678	-0.0032	0.1523	0.983	-0.1946	0.1901	0.306	-0.3314	0.4417	0.4532	-0.3197	0.7827
920	56	upper face (IV)	0.0755	0.0823	0.359	0.0806	0.0843	0.3395	0.0985	0.6802	0.8848	0.0436	0.0835	0.6017	0.4148	0.2912	0.1543	0.0884	0.1342	0.5102	0.0367	0.1744	0.8333	0.2282	0.125	0.0678	0.1535	0.1183	0.1946	0.4108	0.1795	0.0221	0.2591	0.1348	0.0546	-0.0379	0.14	0.7864	0.3943	0.1384	0.0044	0.0508	0.1542	0.742	-0.4347	0.4144	0.2942	-1.2731	1.206
921	56	upper face (IV)	-0.0004	0.0585	0.9939	0.0488	0.0768	0.5248	-0.2115	0.6549	0.7468	-0.0334	0.0601	0.5777	0.2239	0.2321	0.3347	0.1162	0.1089	0.2859	0.1447	0.1387	0.2971	-0.0223	0.0862	0.7961	-0.0318	0.0924	0.7308	-0.0939	0.111	0.3978	0.0963	0.1141	0.399	0.08	0.0894	0.3707	-0.1427	0.1061	0.1785	-0.0619	0.1331	0.6418	0.1469	0.328	0.6543	0.0415	0.5046
922	56	upper face (IV)	0.0756	0.1786	0.672	0.3201	0.4116	0.4367	-0.9697	2.1974	0.659	-0.136	0.2336	0.5605	0.3291	0.7304	0.6523	-0.0076	0.3636	0.9833	-0.1014	0.3909	0.7954	0.1323	0.289	0.6471	0.0389	0.3641	0.9149	0.3673	0.5139	0.4748	0.0879	0.3093	0.7763	0.5802	1.165	0.6185	0.6641	0.8945	0.4578	-0.2377	0.4846	0.6238	-2.3418	2.9074	0.4206	-1.2707	2.2773
923	56	upper face (IV)	-0.0061	0.0554	0.9125	-0.0777	0.0978	0.4265	-0.5991	1.0584	0.5713	-0.021	0.0606	0.7282	-0.1677	0.27	0.5345	-0.1823	0.1131	0.1071	0.0039	0.1585	0.9806	-0.0017	0.0951	0.9853	0.0235	0.1047	0.8226	0.023	0.1204	0.8487	-0.1231	0.1205	0.3067	0.0765	0.1114	0.492	0.0818	0.1112	0.4621	-0.0494	0.1489	0.74	0.1068	0.3617	0.7678	0.1169	0.5579
924	56	upper face (IV)	-0.0975	0.0754	0.1962	0.0427	0.0846	0.6139	0.1291	0.6353	0.839	-0.111	0.0704	0.1151	-0.1431	0.2457	0.5602	-0.0429	0.1171	0.714	-0.1109	0.1549	0.4738	-0.0102	0.1021	0.9203	0.0562	0.0912	0.5379	-0.0082	0.1336	0.9509	0.0824	0.1329	0.535	-0.062	0.1113	0.5777	-0.1442	0.1155	0.2117	0.049	0.152	0.7469	0.1655	0.3648	0.6501	0.0351	0.5016
925	56	upper face (IV)	-0.1475	0.0842	0.0797	0.0577	0.1052	0.5831	0.1616	0.7539	0.8302	-0.1614	0.0833	0.0526	0.165	0.2826	0.5593	0.0141	0.141	0.9203	-0.0836	0.1993	0.6748	0.0338	0.1077	0.7537	0.0609	0.1196	0.6108	0.0517	0.1438	0.7194	0.1153	0.1548	0.4564	-0.0116	0.1226	0.9244	-0.1119	0.1231	0.3634	0.1168	0.1627	0.4728	0.0999	0.4091	0.807	0.2044	0.5808
926	56	upper face (IV)	-0.0066	0.0627	0.9165	0.1134	0.0822	0.168	0.6453	0.9968	0.5174	0.0468	0.066	0.4785	-0.0388	0.2534	0.8782	-0.0063	0.112	0.9555	-0.2989	0.1543	0.0527	-0.097	0.1019	0.3414	-0.0497	0.0944	0.5984	-0.1418	0.1249	0.2563	-0.0423	0.1195	0.7235	-0.116	0.0989	0.2407	-0.1295	0.1079	0.2301	-0.0056	0.1352	0.9669	-0.3542	0.3809	0.3525	0.1085	0.4635
927	56	upper face (IV)	-0.0726	0.0974	0.456	0.1239	0.1105	0.2621	-0.6985	1.1336	0.5378	-0.0485	0.1017	0.6336	0.6896	0.42	0.1007	0.1422	0.1795	0.4283	-0.0173	0.2287	0.9397	0.2636	0.1763	0.1349	0.103	0.157	0.5117	0.1207	0.1963	0.5387	0.3576	0.2135	0.094	0.1017	0.166	0.54	-0.0276	0.1714	0.8719	-0.1662	0.2183	0.4465	-0.4529	0.5065	0.3712	-0.4126	0.7425
928	56	upper face (IV)	0.0031	0.0711	0.9654	0.1189	0.0905	0.1891	0.5943	0.8897	0.5042	0.0448	0.0652	0.4926	-0.3825	0.2861	0.1814	-0.0077	0.1202	0.9492	-0.0472	0.1577	0.7648	-0.0131	0.1069	0.9028	-0.0866	0.0924	0.3486	-0.0245	0.1156	0.8323	-0.1359	0.1182	0.2503	-0.0418	0.1045	0.6892	0.0088	0.1234	0.943	-0.0574	0.1385	0.6788	-0.3752	0.4179	0.3692	-0.0305	0.5552
929	56	upper face (IV)	0.0304	0.0742	0.6823	0.024	0.0975	0.8055	-1.1933	1.6304	0.4642	-0.1186	0.0863	0.1695	-0.0583	0.3172	0.8541	-0.0248	0.1517	0.8704	0.338	0.2396	0.1585	0.1241	0.1317	0.3461	0.0671	0.1254	0.5924	0.1271	0.1716	0.459	0.0961	0.1462	0.5109	0.0818	0.149	0.5831	0.0631	0.1441	0.6614	0.0672	0.1888	0.722	0.6372	0.4973	0.2001	-0.6814	0.8425
930	57	upper face (IV)	0.0092	0.1098	0.933	-0.0023	0.1417	0.9873	-2.7673	3.3877	0.414	-0.068	0.1193	0.5689	-0.318	0.4732	0.5016	-0.1488	0.2236	0.5057	0.117	0.3122	0.7078	-0.1607	0.2102	0.4447	-0.1206	0.1831	0.5103	-0.1736	0.2648	0.5119	-0.2142	0.2465	0.3849	-0.1324	0.1952	0.4976	-0.0551	0.2088	0.792	0.1487	0.2548	0.5596	-0.5209	0.7087	0.4623	0.3031	0.8913
931	57	upper face (IV)	-0.2231	1.9973	0.911				0.0388	2.3504	0.9868	-0.0613	0.3923	0.8759	-1.394	11.3584	0.9023	0.6914	1.7775	0.6973	-0.108	0.6182	0.8614				-0.0568	0.4604	0.9019	0.1221	0.6017	0.8391	0.4322	1.3796	0.7541	0.076	0.3528	0.8294	0.4828	0.9251	0.6018	-0.3089	0.5981	0.6055	0.6213	5.4786	0.9097	3.5063	29.3802
932	57	upper face (IV)	-0.0492	0.1361	0.7181	-0.042	0.184	0.8194	1.7253	2.7261	0.5268	-0.0563	0.1342	0.675	0.4878	0.6388	0.4452	-0.15	0.2874	0.6017	0.561	0.542	0.3006	0.2656	0.2919	0.3628	0.1693	0.2821	0.5485	0.6817	0.5599	0.2234	-0.0101	0.2794	0.9711	0.302	0.3521	0.3911	-0.0144	0.2563	0.9553	0.4281	0.4616	0.3538	-0.4156	0.7216	0.5647	0.5943	1.0999
933	57	upper face (IV)	0.0526	0.0805	0.5134	0.0527	0.1018	0.6043	1.6935	2.1649	0.4341	-0.0475	0.0903	0.5989	0.0922	0.3175	0.7716	0.2366	0.1437	0.0997	0.1613	0.1931	0.4037	-0.1018	0.1272	0.4233	0.1842	0.1406	0.1903	0.1727	0.173	0.318	0.0769	0.138	0.5772	0.2222	0.1385	0.1087	-0.0395	0.1434	0.7831	0.4501	0.1959	0.0216	-0.1309	0.4688	0.7801	-0.0068	0.6948
934	57	upper face (IV)	0.023	0.0666	0.7301	-0.0525	0.1016	0.6054	-0.6172	1.03	0.549	0.0638	0.0627	0.3083	0.2544	0.3017	0.3991	-0.0251	0.132	0.8489	-0.2449	0.1722	0.155	-0.0561	0.1115	0.6149	0.0232	0.1174	0.8437	-0.0578	0.1405	0.6807	0.1198	0.1323	0.3652	-0.0376	0.1168	0.7473	-0.0063	0.1275	0.9608	0.0162	0.1453	0.911	0.0233	0.367	0.9494	-0.0899	0.5543
935	57	upper face (IV)	-0.0151	0.0864	0.8609	-0.111	0.1083	0.3056	-0.7448	1.235	0.5465	-0.0554	0.0941	0.5556	0.105	0.3763	0.7802	0.0225	0.1593	0.8877	0.0565	0.2135	0.7914	-0.0016	0.1235	0.9894	-0.0763	0.1334	0.5674	-0.0027	0.1667	0.9872	-0.063	0.1562	0.6868	-0.0802	0.1312	0.5408	-0.1724	0.1654	0.2975	-0.0301	0.184	0.8702	0.4936	0.4824	0.3062	0.4204	0.8181
936	57	upper face (IV)	0.2112	0.2729	0.4391	-0.2509	0.3161	0.4273	0.0665	1.6995	0.9688	0.1325	0.2255	0.5567	0.7903	1.1142	0.4782	-0.2947	0.4909	0.5483	-0.4468	0.719	0.5343	0.2548	0.4985	0.6093	0.1444	0.336	0.6673	0.1521	0.4391	0.729	0.069	0.4064	0.8651	-0.1892	0.3541	0.5932	-0.158	0.3877	0.6836	0.2662	0.5739	0.6428	-1.4082	1.6808	0.4021	-1.4568	2.3504
937	57	upper face (IV)	0.113	0.2053	0.582	0.1986	0.3384	0.5572	0.2409	1.5754	0.8785	-0.0633	0.2099	0.763	-1.3753	1.7627	0.4352	0.034	0.4076	0.9335	0.0414	0.5885	0.9439	-0.6915	1.585	0.6626				-0.6622	1.1656	0.5699	-0.5419	0.9561	0.5709										0.5228	1.2669	0.6799	1.2793	2.1482
938	57	upper face (IV)	-0.0252	0.0607	0.6786	0.0541	0.0943	0.5659	0.8942	1.1816	0.4492	0.0378	0.0713	0.5959	0.1143	0.276	0.6789	0.0558	0.1324	0.6734	0.0251	0.179	0.8884	0.023	0.0998	0.8179	0.1066	0.1109	0.3362	-0.0486	0.1381	0.7246	0.0996	0.1239	0.4218	0.0633	0.1032	0.5394	-0.055	0.115	0.6328	0.178	0.1472	0.2268	-0.3048	0.3907	0.4353	0.1014	0.5835
939	57	upper face (IV)
940	57	upper face (IV)	-0.0657	0.0741	0.3756	-0.0269	0.0992	0.7863	0.1193	0.7897	0.88	-0.0246	0.075	0.7432	0.2253	0.3048	0.4599	0.1792	0.1483	0.2267	0.1626	0.215	0.4494	-0.0904	0.1351	0.5032	0.0923	0.1295	0.4763	0.0384	0.1592	0.8095	-0.1058	0.1462	0.469	-0.1171	0.105	0.2647	0.3626	0.1557	0.0198	-0.06	0.1648	0.7158	0.535	0.4992	0.2838	-0.9189	0.9544
941	58	upper face (IV)	-0.1328	0.0769	0.0841	0.0336	0.1044	0.7479	0.1996	0.7719	0.796	-0.0737	0.0743	0.3208	0.0394	0.3343	0.9061	0.1552	0.1496	0.2993	0.3662	0.2398	0.1267	0.1439	0.132	0.2758	0.1244	0.1285	0.3328	0.0876	0.1664	0.5986	0.0378	0.1383	0.7849	0.0739	0.1117	0.508	0.1167	0.134	0.3839	0.0556	0.1657	0.7371	-0.2988	0.438	0.4951	0.1796	0.6599
942	58	upper face (IV)	-0.0661	0.0679	0.3305	-0.1188	0.1024	0.2462	-0.1307	0.7166	0.8553	-0.0513	0.0654	0.4327	-0.1615	0.314	0.6071	0.1018	0.1547	0.5104	-0.0929	0.2049	0.6505	-0.0919	0.1309	0.4826	0.149	0.1285	0.2462	0.1534	0.1381	0.2669	-0.0231	0.1365	0.8654	0.1067	0.1059	0.3135	-0.0981	0.1296	0.4494	-0.0586	0.1755	0.7386	0.4213	0.4318	0.3292	0.678	0.79
943	58	upper face (IV)	0.1103	0.0975	0.2579	-0.0674	0.137	0.6225	-0.143	0.9413	0.8792	-0.0542	0.0956	0.5705	-0.1714	0.3783	0.6505	-0.0107	0.1676	0.9491	-0.3436	0.2499	0.1691	-0.2608	0.1783	0.1435	0.0436	0.1491	0.7701	-0.4745	0.2511	0.0588	-0.5464	0.2372	0.0212	0.0244	0.1528	0.8734	-0.2819	0.1646	0.0868	-0.2116	0.216	0.3272	-0.3795	0.5498	0.49	0.358	0.7519
944	58	upper face (IV)	0.0667	0.061	0.2737	0.049	0.0799	0.5398	0.1633	0.6407	0.7989	-0.0337	0.0602	0.5763	-0.2763	0.2683	0.3031	0.0828	0.1405	0.5557	-0.0671	0.1794	0.7085	-0.138	0.1138	0.2254	-0.0039	0.1084	0.9712	-0.044	0.1286	0.7323	-0.134	0.1217	0.2709	0.1281	0.1062	0.2277	-0.2589	0.141	0.0663	-0.192	0.1674	0.2513	0.5154	0.4422	0.2438	0.9322	0.9643
945	58	upper face (IV)	0.0158	0.0676	0.8148	0.1123	0.0833	0.1779	0.3973	0.8094	0.6235	0.0032	0.0691	0.9629	-0.2343	0.2897	0.4186	0.144	0.1254	0.2507	0.0946	0.1614	0.5577	0.0003	0.1065	0.9976	-0.1528	0.1106	0.1673	-0.0879	0.1314	0.5034	-0.0091	0.1167	0.9378	-0.0012	0.1007	0.9906	0.0197	0.1162	0.8654	-0.1164	0.1595	0.4655	-0.1909	0.3525	0.5881	0.0063	0.5501
946	58	upper face (IV)	-0.0222	0.0767	0.7727	0.0599	0.0907	0.5092	0.5049	0.9283	0.5865	-0.0255	0.0814	0.7539	-0.3328	0.3008	0.2686	0.2325	0.1351	0.0853	0.108	0.1743	0.5356	0.0541	0.1154	0.639	-0.1124	0.105	0.2844	-0.0116	0.1422	0.9352	0.0104	0.13	0.9362	-0.0021	0.1067	0.984	0.0388	0.1222	0.7505	-0.0387	0.1745	0.8244	-0.4484	0.4307	0.2979	0.0106	0.6046
947	58	upper face (IV)	0.0479	0.0782	0.5407	0.1573	0.1056	0.1363	0.0516	0.8052	0.9489	0.0595	0.0811	0.4631	-0.0434	0.3729	0.9074	0.1828	0.1513	0.2271	0.1383	0.1963	0.4812	-0.0422	0.1198	0.7244	-0.154	0.1331	0.2472	-0.2081	0.1642	0.2051	-0.1257	0.138	0.3623	0.0248	0.1215	0.8385	0.1487	0.1455	0.3068	-0.119	0.1773	0.502	-0.2779	0.4304	0.5184	0.2747	0.6946
948	58	upper face (IV)	0.0057	0.0628	0.9272	0.0361	0.0777	0.6419	0.3968	0.8151	0.6264	-0.0116	0.0601	0.8464	-0.2828	0.2597	0.2762	0.0037	0.103	0.9713	-0.056	0.17	0.742	0.0652	0.1011	0.519	-0.1204	0.0998	0.2275	-0.0981	0.1348	0.4664	-0.0137	0.1148	0.9048	-0.0777	0.0981	0.4284	-0.0993	0.119	0.4042	-0.1417	0.153	0.3541	-0.2557	0.3315	0.4405	-0.5849	0.6937
949	58	upper face (IV)
950	58	upper face (IV)	0.1706	0.0901	0.0582	0.0866	0.1146	0.4496	-0.1284	0.7606	0.866	0.1316	0.0818	0.1076	0.223	0.3674	0.5439	-0.0463	0.1585	0.7702	-0.1215	0.2133	0.5689	-0.1359	0.1221	0.2657	-0.0423	0.1198	0.7237	-0.1327	0.1598	0.4063	-0.0386	0.1699	0.8203	-0.1243	0.1362	0.3614	0.379	0.1771	0.0324	0.1106	0.1805	0.5401	-0.2412	0.4337	0.5781	-0.1017	0.6811
951	58	upper face (IV)	0.1304	0.0599	0.0294	0.1291	0.0778	0.0974	-0.0684	0.5396	0.8991	0.0937	0.0606	0.1219	-0.0912	0.2526	0.7181	-0.1252	0.1162	0.2812	-0.1198	0.1571	0.4455	-0.151	0.0962	0.1167	-0.1999	0.0955	0.0364	-0.075	0.1132	0.5076	-0.0259	0.1012	0.7978	-0.0478	0.0854	0.5753	0.0254	0.1063	0.811	-0.0546	0.141	0.6986	-0.006	0.3531	0.9864	0.6173	0.7319
952	58	upper face (IV)	0.0171	0.0773	0.8244	0.1037	0.1002	0.3008	-0.0814	0.6976	0.9072	0.0313	0.0719	0.6631	0.23	0.3079	0.4552	0.0386	0.1512	0.7987	0.1311	0.183	0.4738	0.1104	0.1072	0.3029	-0.0062	0.1171	0.9578	-0.0276	0.1477	0.8517	0.1041	0.1347	0.4397	0.0384	0.1055	0.7159	0.1789	0.1404	0.2026	-0.059	0.1624	0.7163	0.1842	0.3789	0.6269	-0.6457	0.7686
953	58	upper face (IV)	-0.1183	0.1143	0.3005	-0.1726	0.1736	0.3202	0.5315	1.2687	0.6753	-0.0117	0.1138	0.9183	-0.0769	0.4752	0.8715	0.1063	0.2019	0.5983	0.2058	0.3009	0.494	0.5255	0.3107	0.0908	0.134	0.1858	0.4709	0.4884	0.3143	0.1202	0.2757	0.2398	0.2502	0.0921	0.1917	0.631	0.0591	0.1892	0.7549	0.144	0.247	0.56	-0.0285	0.5968	0.9619	-0.3735	1.0281
954	58	upper face (IV)	-0.1417	0.0838	0.0908	0.0398	0.0979	0.6844	0.1661	0.6928	0.8105	-0.0995	0.0883	0.2597	-0.3862	0.2909	0.1843	0.1551	0.1466	0.2903	0.0976	0.1998	0.6252	0.0017	0.1183	0.9883	-0.1016	0.112	0.3644	0.0736	0.1664	0.658	0.1582	0.1318	0.2298	-0.0355	0.1237	0.7741	-0.0662	0.1408	0.6384	0.0568	0.1829	0.7561	-0.5222	0.442	0.2374	-0.3013	0.6418
955	58	upper face (IV)	0.0579	0.0859	0.5009	0.0689	0.1221	0.5729	0.3671	1.0036	0.7145	0.0214	0.0908	0.8134	-0.439	0.4008	0.2734	0.0124	0.1716	0.9422	-0.0219	0.2278	0.9234	-0.1671	0.1688	0.3221	-0.1777	0.1673	0.2883	0.1597	0.2026	0.4307	0.2324	0.1679	0.1662	-0.085	0.1485	0.5672	-0.0744	0.1723	0.6659	0.0932	0.1853	0.615	0.5319	0.565	0.3465	0.0994	0.7602
956	59	upper face (IV)	-0.0365	0.095	0.7005	0.0835	0.0943	0.3763	0.0977	0.6962	0.8884	0.0241	0.0949	0.7996	-0.006	0.3199	0.9851	0.1218	0.1608	0.4486	0.0411	0.1825	0.8219	0.1103	0.1373	0.4217	0.0939	0.1137	0.4088	0.1465	0.1801	0.4158	0.048	0.1441	0.7388	0.023	0.1272	0.8566	0.3126	0.1553	0.0441	0.1805	0.1777	0.3096	-0.8436	0.5468	0.1229	-0.5021	0.6786
957	59	upper face (IV)	-0.0142	0.0831	0.8644	0.0966	0.092	0.2938	0.2067	0.6752	0.7594	0.041	0.0861	0.6339	-0.0226	0.2712	0.9337	0.1034	0.1415	0.4649	-0.0338	0.1621	0.8347	0.0743	0.1183	0.5301	0.0567	0.0968	0.5577	0.148	0.1576	0.3479	0.0137	0.1213	0.91	0.0339	0.1173	0.7726	0.2906	0.13	0.0255	0.068	0.15	0.6502	-0.9187	0.54	0.0889	-0.5904	0.6592
958	59	upper face (IV)	-0.0006	0.0803	0.9941	0.0602	0.0805	0.4546	0.0221	0.6002	0.9707	0.0268	0.0859	0.755	0.1717	0.2694	0.5239	0.0208	0.1263	0.869	0.0042	0.1586	0.9789	0.066	0.1148	0.5652	0.1037	0.0971	0.2855	0.1725	0.1513	0.2541	-0.0051	0.1214	0.9663	0.0431	0.1083	0.6903	0.3578	0.1285	0.0054	0.2236	0.1519	0.1411	-0.6251	0.4295	0.1456	-0.5691	0.6848
959	59	upper face (IV)	-0.0439	0.0634	0.4887	-0.1338	0.0905	0.1391	-0.2835	0.641	0.6583	-0.0821	0.0647	0.2045	-0.2123	0.2434	0.3831	0.1321	0.1124	0.24	0.1375	0.1648	0.4039	-0.0297	0.1042	0.7758	-0.0093	0.0892	0.9171	-0.1196	0.1252	0.3395	0.0796	0.1043	0.4452	-0.1072	0.1031	0.2982	-0.2781	0.1091	0.0108	-0.0181	0.1292	0.8884	0.3815	0.362	0.2919	0.2519	0.5369
960	59	upper face (IV)	-0.0636	0.0759	0.4025	-0.1745	0.1044	0.0947	-0.2661	0.7442	0.7207	-0.0902	0.0749	0.2285	-0.2144	0.3006	0.4758	0.1724	0.1341	0.1986	0.1936	0.1987	0.3301	-0.0214	0.1258	0.8647	0.0462	0.1091	0.6715	-0.0679	0.1449	0.6393	0.1113	0.1352	0.4106	-0.1175	0.1231	0.3397	-0.2566	0.1268	0.043	0.0008	0.1532	0.9961	0.3724	0.4173	0.3722	0.0059	0.6224
961	59	upper face (IV)	-0.0279	0.0712	0.6955	0.0846	0.1031	0.4122	0.2053	0.7527	0.785	-0.0428	0.0694	0.5371	0.0687	0.3316	0.8359	-0.0089	0.1412	0.9498	0.1343	0.2033	0.5089	0.1124	0.1267	0.3751	-0.0359	0.1298	0.7823	0.0226	0.1406	0.8725	-0.0177	0.1409	0.9	0.0645	0.1185	0.5862	-0.0594	0.1306	0.6493	0.1318	0.17	0.438	-0.0778	0.4016	0.8463	-0.0925	0.6683
962	59	upper face (IV)	-0.0001	0.057	0.9984	0.0336	0.0671	0.6167	0.2252	0.5734	0.6945	-0.0382	0.0546	0.4843	0.1405	0.2234	0.5293	-0.0848	0.097	0.3818	-0.1066	0.1343	0.4273	0.0166	0.0877	0.8499	-0.1171	0.0871	0.1788	-0.1708	0.1056	0.106	-0.0306	0.1069	0.7748	-0.0358	0.0829	0.6664	-0.2971	0.1003	0.0031	-0.1421	0.1143	0.2139	0.234	0.2978	0.4319	-0.0488	0.4163
963	59	upper face (IV)	-0.0076	0.057	0.8936	-0.013	0.0751	0.8626	0.3101	0.6184	0.6161	0.0289	0.0578	0.6165	-0.0055	0.2286	0.9809	0.0124	0.1063	0.9069	-0.0137	0.1391	0.9213	0.0443	0.0898	0.6216	0.1134	0.0872	0.1931	0.2733	0.1009	0.0067	0.0231	0.1021	0.8208	0.0588	0.0886	0.5068	0.3315	0.1069	0.0019	0.0626	0.1175	0.5945	-0.5063	0.3633	0.1634	-0.2545	0.5477
964	59	upper face (IV)	0.0482	0.0721	0.5035	0.0112	0.0912	0.9021	-0.0483	0.6994	0.9449	0.0153	0.0738	0.8361	-0.2	0.3334	0.5485	0.0315	0.137	0.8181	0.0071	0.1795	0.9683	-0.0309	0.1221	0.8001	0.0652	0.1119	0.56	0.2381	0.1343	0.0762	0.0035	0.1322	0.9786	0.0889	0.115	0.4394	0.1113	0.1397	0.4258	0.092	0.1577	0.5599	-0.3424	0.4223	0.4175	-0.1545	0.5902
965	59	upper face (IV)	-0.0032	0.0537	0.952	-0.0473	0.0727	0.5149	-0.652	0.9256	0.4811	-0.0366	0.0562	0.5156	-0.0892	0.2538	0.7252	0.1971	0.1089	0.0703	0.175	0.1381	0.205	-0.1144	0.092	0.2139	-0.0208	0.0798	0.7947	-0.2076	0.1109	0.0611	-0.0415	0.0998	0.6772	-0.0406	0.0888	0.6473	0.0118	0.0905	0.8967	-0.0379	0.1337	0.7767	0.1821	0.3184	0.5672	0.1559	0.498
966	59	upper face (IV)	-0.0595	0.0796	0.4544	-0.1356	0.1192	0.2553	0.5533	0.9867	0.5749	-0.0541	0.0783	0.49	-0.1444	0.3636	0.6913	0.0086	0.1645	0.9585	-0.0907	0.2274	0.6901	0.0619	0.1384	0.6549	0.0075	0.126	0.9528	0.2416	0.1729	0.1625	0.0372	0.1707	0.8275	-0.0414	0.1251	0.7407	0.0662	0.1457	0.6495	-0.1636	0.2015	0.4169	-0.2515	0.4965	0.6125	-0.5804	0.8426
967	59	upper face (IV)	0.0202	0.0613	0.7414	0.0153	0.0796	0.8474	0.1177	0.5835	0.8401	0.0462	0.0658	0.4823	0.0723	0.2401	0.7633	-0.0351	0.124	0.7772	0.0707	0.158	0.6546	0.0071	0.0974	0.9422	0.0211	0.0923	0.8191	-0.0309	0.128	0.8089	0.0807	0.1211	0.505	0.026	0.0968	0.788	0.0829	0.1214	0.4946	-0.0441	0.1348	0.7437	0.3423	0.3703	0.3553	0.1288	0.4935
968	59	upper face (IV)	0.0674	0.0769	0.3806	0.1284	0.1259	0.308	0.582	0.976	0.551	0.0611	0.0718	0.3947	0.4193	0.2879	0.1452	-0.2753	0.1332	0.0388	-0.0209	0.1658	0.8996	0.081	0.1324	0.5408	0.0012	0.1148	0.9918	0.0848	0.1695	0.6167	0.0249	0.1465	0.8649	0.1217	0.1331	0.3605	-0.2225	0.1402	0.1125	-0.0494	0.1765	0.7797	0.4511	0.4522	0.3186	-0.4347	0.6912
969	59	upper face (IV)	-0.0309	0.075	0.6801	-0.0391	0.0909	0.6671	-0.4332	0.8109	0.5932	-0.0613	0.0806	0.4464	-0.1235	0.3057	0.6862	0.237	0.1379	0.0857	0.0245	0.1828	0.8934	-0.0756	0.1138	0.5063	-0.0636	0.11	0.5629	-0.1871	0.1542	0.225	-0.0412	0.1348	0.7596	-0.1273	0.1197	0.2872	-0.1969	0.1524	0.1965	-0.0945	0.1757	0.5905	-0.2578	0.412	0.5315	-0.3348	0.6498
970	59	upper face (IV)	0.0748	0.0875	0.3923	0.0929	0.1205	0.4409	-0.4921	1.0389	0.6357	-0.0433	0.0862	0.6157	-0.2664	0.366	0.4667	-0.0401	0.1561	0.7972	-0.0919	0.2096	0.661	-0.114	0.1512	0.4509	-0.1996	0.1348	0.1386	-0.1108	0.1708	0.5164	-0.137	0.171	0.423	0.086	0.1496	0.5651	-0.0173	0.1553	0.9112	0.0265	0.1832	0.8851	0.1626	0.5138	0.7516	0.1663	0.7187
971	59	upper face (IV)	0.0168	0.0752	0.8236	-0.005	0.1056	0.9621	1.0987	1.4858	0.4596	0.0506	0.0804	0.5292	0.0174	0.3158	0.9561	-0.2571	0.1366	0.0599	-0.1207	0.1851	0.5144	0.2069	0.1205	0.0859	0.0863	0.1102	0.4337	0.3265	0.1614	0.0431	0.2641	0.1363	0.0527	0.0622	0.1269	0.6238	-0.2185	0.1393	0.1167	-0.0153	0.1835	0.9335	0.1693	0.4402	0.7006	-0.4394	0.7428
972	59	upper face (IV)	0.0025	0.073	0.9724	-0.0187	0.1052	0.8589	0.8987	1.1733	0.4437	0.0475	0.0772	0.5386	0.2147	0.3132	0.4931	-0.2275	0.1374	0.0977	-0.0918	0.1724	0.5946	0.1357	0.1219	0.2653	0.0952	0.1157	0.4106	0.3886	0.1627	0.0169	0.0272	0.1354	0.8408	0.1114	0.1201	0.3539	0.2141	0.1489	0.1505	0.0053	0.1792	0.9762	-0.0345	0.4151	0.9338	-0.0868	0.6878
973	59	upper face (IV)	0.006	0.0748	0.9356	-0.0464	0.1085	0.669	0.1216	0.7542	0.8719	0.0706	0.078	0.3656	-0.2374	0.359	0.5085	0.0565	0.1428	0.6921	0.0074	0.2067	0.9715	0.0119	0.1293	0.9269	0.0673	0.1345	0.6171	0.1089	0.1574	0.489	0.0917	0.151	0.5436	0.0138	0.128	0.9144	0.3003	0.1532	0.05	-0.059	0.1775	0.7396	-0.1098	0.4236	0.7955	0.5432	0.7695
974	60	upper face (IV)	-0.1183	0.143	0.408	0.2419	0.1999	0.2263	-0.3628	1.0791	0.7367	-0.114	0.1558	0.4642	0.6113	0.7212	0.3967	0.0604	0.2809	0.8297	-0.1021	0.2519	0.6852	0.1536	0.1875	0.4129	-0.1954	0.2917	0.5029	0.0958	0.3522	0.7857	-0.06	0.1809	0.7402	0.1856	0.3994	0.6421	0.0363	0.2073	0.8609	-0.1547	0.2606	0.5527	-0.2494	0.5314	0.6388	-0.7306	1.0464
975	60	upper face (IV)	-0.0774	0.0925	0.4031	0.1379	0.1002	0.1685	-0.1656	0.7468	0.8246	-0.0373	0.0993	0.7074	0.3312	0.3274	0.3117	0.0049	0.1524	0.9746	-0.0143	0.1811	0.9369	0.1758	0.1287	0.172	-0.0756	0.1244	0.5433	0.1475	0.1642	0.3691	0.0422	0.1247	0.7347	0.1599	0.1433	0.2647	0.0589	0.1512	0.6968	0.1086	0.1969	0.5812	-0.2274	0.3982	0.5679	-0.312	0.6277
976	60	upper face (IV)	-0.1274	0.1114	0.2529	0.1189	0.1082	0.2716	-0.1163	0.828	0.8883	-0.1245	0.1268	0.3262	0.504	0.5522	0.3614	-0.0914	0.1631	0.5753	-0.1729	0.181	0.3394	0.2199	0.142	0.1216	-0.1154	0.1815	0.525	0.3013	0.1899	0.1126	0.2994	0.2415	0.215	0.0211	0.1975	0.915	0.468	0.4289	0.2752	0.1249	0.3757	0.7395	0.0615	0.4415	0.8892	-1.5365	1.5174
977	60	upper face (IV)	-0.1093	0.1329	0.4106	0.2239	0.1616	0.1659	-0.2578	1.0442	0.805	-0.1275	0.1342	0.3418	0.2633	0.4431	0.5524	0.0171	0.2153	0.9368	0.0599	0.2815	0.8315	0.2521	0.1789	0.1588	-0.1373	0.1947	0.4808	0.1471	0.2702	0.5862	0.0163	0.1654	0.9215	0.1641	0.2582	0.5251	-0.0046	0.1935	0.9812	0.0804	0.3187	0.8009	-0.2316	0.5198	0.6559	-0.9065	1.0299
978	60	upper face (IV)	-0.0611	0.0533	0.251	0.0448	0.0745	0.5472	0.5303	0.8839	0.5485	-0.0849	0.0577	0.1414	0.3155	0.2729	0.2476	0.095	0.1054	0.3677	-0.0463	0.1478	0.7543	0.0425	0.0966	0.66	-0.2007	0.0936	0.032	-0.0864	0.1188	0.4672	-0.0276	0.1154	0.8107	-0.1235	0.099	0.2124	0.1358	0.1141	0.2338	-0.0506	0.1322	0.7021	-0.0978	0.306	0.7492	-0.7449	0.7561
979	60	upper face (IV)
980	60	upper face (IV)	0.2674	0.1349	0.0473	-0.1155	0.1167	0.3223	-0.5785	1.1344	0.6101	0.2834	0.1336	0.0339	-0.2485	0.4835	0.6072	-0.0714	0.2623	0.7853	-0.0507	0.3324	0.8788	-0.3605	0.2679	0.1783	-0.0263	0.1312	0.8409	-0.2977	0.205	0.1464	-0.1179	0.1895	0.5337	-0.0009	0.2163	0.9967	-0.2488	0.3603	0.4898	-0.1816	0.5599	0.7456	-0.2348	0.5728	0.6819	1.1608	1.392
981	60	upper face (IV)	-0.0117	0.0825	0.8872	-0.0457	0.083	0.5821	0.3802	0.79	0.6303	-0.0561	0.0813	0.4906	-0.0533	0.3384	0.8749	0.0929	0.1448	0.5212	0.2812	0.1757	0.1094	-0.0077	0.1203	0.9489	0.3725	0.1444	0.0099	0.373	0.1536	0.0152	0.0879	0.1409	0.5326	0.1481	0.1252	0.2367	0.1919	0.1375	0.1627	-0.1391	0.1695	0.4121	0.1292	0.4262	0.7618	0.9328	0.9858
982	60	upper face (IV)	-0.0382	0.0846	0.652	0.1894	0.0844	0.0249	0.3273	0.7173	0.6482	-0.0751	0.0867	0.3865	0.3883	0.2618	0.138	-0.0079	0.1305	0.9516	0.0054	0.1525	0.9716	0.0726	0.1128	0.5199	-0.111	0.1009	0.2712	0.0587	0.1607	0.7148	0.0701	0.1195	0.5571	0.0269	0.1097	0.8061	0.0276	0.1122	0.8058	-0.1135	0.1749	0.5164	0.2682	0.3394	0.4294	-0.213	0.5557
983	60	upper face (IV)	-0.0992	0.0896	0.2678	0.1963	0.1072	0.0672	0.305	0.8907	0.7321	0.0148	0.0948	0.8756	-0.1716	0.3021	0.57	-0.0106	0.1536	0.9451	-0.1202	0.1928	0.5332	0.1336	0.1317	0.3101	-0.0632	0.1103	0.5664	0.1435	0.1757	0.4139	0.1432	0.1603	0.3716	-0.2412	0.1212	0.0465	0.06	0.1357	0.6583	0.0273	0.1753	0.8764	-0.2657	0.4227	0.5295	-0.7356	0.8824
984	60	upper face (IV)	-0.0506	0.0622	0.4161	-0.001	0.0856	0.9909	-0.2474	0.7291	0.7343	-0.0037	0.0635	0.9532	-0.2083	0.2574	0.4184	-0.0427	0.114	0.7078	0.0094	0.1553	0.9517	0.1497	0.099	0.1303	0.1634	0.1005	0.1041	0.2799	0.1396	0.0449	0.2618	0.1261	0.0378	-0.0182	0.1046	0.8616	0.1825	0.1252	0.1449	0.2799	0.1667	0.0932	0.0956	0.3638	0.7928	-0.392	0.6194
985	60	upper face (IV)	0.0846	0.0676	0.2106	0.0012	0.118	0.9916	-0.0064	0.7023	0.9927	0.0775	0.069	0.2619	-0.2487	0.2981	0.4041	0.0333	0.1281	0.7946	0.0095	0.1712	0.9557	-0.0017	0.1172	0.9884	-0.055	0.1166	0.6373	-0.0502	0.1251	0.6883	0.0673	0.1354	0.6194	0.0249	0.1022	0.8076	0.0953	0.12	0.4271	0.0543	0.1576	0.7305	0.3263	0.4176	0.4346	-0.5485	0.7809
986	60	upper face (IV)	-0.0819	0.0761	0.282	0.2088	0.0766	0.0064	-0.4911	0.8235	0.5509	-0.0648	0.0814	0.4256	0.0763	0.2367	0.7471	0.0154	0.1163	0.8946	0.0693	0.1602	0.6655	0.1444	0.0962	0.1333	-0.0422	0.0884	0.6331	0.1561	0.1427	0.2742	0.1098	0.1099	0.3176	-0.0637	0.0937	0.4968	0.2288	0.1094	0.0366	0.2125	0.1676	0.2048	-0.05	0.3204	0.8761	-0.6322	0.7265
987	60	upper face (IV)	-0.0325	0.0746	0.6629	0.0829	0.1183	0.4836	0.0843	0.7815	0.9141	0.106	0.0798	0.1837	-0.6805	0.4123	0.0989	0.1454	0.1495	0.3309	0.2048	0.1946	0.2925	0.0426	0.1239	0.7309	0.149	0.137	0.2768	0.0982	0.1592	0.5374	0.0918	0.1598	0.5654	0.1355	0.1298	0.2964	-0.0867	0.1396	0.5343	-0.1254	0.1802	0.4866	-0.241	0.4226	0.5684	0.8045	0.9148
988	60	upper face (IV)	-0.1171	0.0777	0.1317	0.1345	0.0772	0.0812	-0.1302	0.5928	0.8262	-0.1368	0.0819	0.0949	-0.1194	0.2523	0.6362	0.1899	0.1357	0.1617	0.02	0.1798	0.9113	0.0027	0.1029	0.9792	-0.0829	0.0979	0.3966	0.043	0.1757	0.8067	0.0371	0.1143	0.7457	-0.1123	0.0991	0.2574	0.0846	0.1076	0.4321	-0.1225	0.1613	0.4475	-0.1226	0.3616	0.7345	-0.0121	0.5344
989	60	upper face (IV)	-0.0642	0.0637	0.3136	0.065	0.0804	0.4188	-0.0496	0.5571	0.929	-0.1071	0.0659	0.1038	-0.2389	0.2621	0.3622	0.1836	0.1192	0.1237	0.0974	0.1573	0.5359	-0.0458	0.0909	0.6145	0.0207	0.0954	0.8286	0.033	0.1336	0.8052	0.057	0.1145	0.6187	-0.0383	0.097	0.693	-0.0063	0.1082	0.9534	-0.1121	0.1338	0.4022	0.0455	0.3355	0.892	0.1104	0.4847
990	60	upper face (IV)	-0.1166	0.071	0.1007	0.0752	0.0858	0.3806	-0.1025	0.592	0.8626	-0.1371	0.0777	0.0777	-0.0501	0.2566	0.8452	0.1612	0.1319	0.2215	-0.0329	0.1837	0.8577	0.0114	0.1026	0.9112	-0.0193	0.1064	0.8558	0.0467	0.1684	0.7814	0.0288	0.1142	0.801	-0.0493	0.1001	0.6222	0.1016	0.1061	0.3381	0.0563	0.162	0.7283	-0.128	0.3534	0.7172	-0.1825	0.5738
991	60	upper face (IV)	-0.0953	0.0828	0.2499	0.1886	0.1015	0.0631	0.5557	0.9254	0.5482	-0.0107	0.0885	0.9033	0.1876	0.3306	0.5705	-0.075	0.1475	0.6114	-0.005	0.1918	0.9792	0.1197	0.1302	0.358	-0.3096	0.1401	0.0271	-0.0254	0.179	0.8873	0.133	0.1304	0.3076	-0.151	0.1192	0.2055	0.1518	0.136	0.2644	0.1145	0.1906	0.5481	0.1444	0.3887	0.7103	-0.0895	0.5865
992	60	upper face (IV)	0.0636	0.0819	0.4372	0.0319	0.1007	0.7518	0.7895	1.1325	0.4857	-0.0056	0.0858	0.9482	-0.2292	0.3134	0.4644	0.0929	0.1329	0.4847	0.1835	0.1688	0.277	0.0383	0.1242	0.7579	0.1791	0.1188	0.1317	-0.0183	0.1568	0.907	-0.0793	0.1311	0.5453	-0.0203	0.1135	0.8582	-0.0511	0.1258	0.6844	0.1135	0.1644	0.4899	0.2204	0.3749	0.5565	0.3615	0.6552
993	60	upper face (IV)	0.0429	0.0708	0.5449	-0.0452	0.0793	0.5689	-0.1806	0.6797	0.7905	0.0727	0.0711	0.3068	0.2388	0.283	0.3988	-0.0268	0.1203	0.8235	-0.0177	0.1699	0.9169	0.0149	0.1284	0.9079	-0.0515	0.1056	0.6257	-0.0173	0.1577	0.9125	-0.0369	0.1367	0.7874	-0.011	0.1009	0.913	0.1719	0.1262	0.173	0.4866	0.1837	0.0081	-0.2624	0.3774	0.4869	0.5311	0.6766
994	60	upper face (IV)
995	60	upper face (IV)	0.08	0.0918	0.3835	-0.1448	0.104	0.1639	-0.0026	0.6647	0.9968	0.1239	0.0975	0.2038	-0.0673	0.3343	0.8404	-0.1497	0.1613	0.3533	-0.0331	0.191	0.8626	-0.0809	0.1255	0.5194	0.1649	0.1207	0.1719	0.0907	0.2174	0.6766	0.1172	0.1326	0.377	0.1271	0.1192	0.2865	-0.0729	0.1331	0.5841	0.2193	0.184	0.2333	-0.0106	0.3409	0.9752	0.1021	0.5302
996	60	upper face (IV)	-0.135	0.0781	0.0841	0.0019	0.0967	0.9846	-0.3172	0.8388	0.7053	0.0279	0.08	0.7276	-0.0013	0.3507	0.9971	0.0808	0.1436	0.5739	-0.192	0.2101	0.361	0.014	0.1214	0.9085	-0.1064	0.1294	0.4108	-0.0132	0.163	0.9353	-0.0386	0.1616	0.811	-0.0408	0.1217	0.7377	0.1686	0.1467	0.2503	-0.0025	0.1763	0.9887	-0.6118	0.5311	0.2494	0.1237	0.6304
997	60	upper face (IV)	-0.1009	0.0957	0.2917	0.1348	0.1171	0.2496	0.9964	1.3963	0.4755	-0.1676	0.1004	0.0953	-0.1412	0.3422	0.68	-0.0946	0.1433	0.5093	0.0353	0.1911	0.8536	0.113	0.1431	0.4297	0.124	0.1322	0.3484	0.3269	0.181	0.0709	0.2274	0.1608	0.1574	0.0931	0.1582	0.5562	0.2544	0.1616	0.1153	-0.2338	0.1946	0.2296	0.7152	0.5816	0.2188	0.3023	0.7131
998	60	upper face (IV)	-0.2256	0.1572	0.1513	-0.0405	0.1431	0.7773	-0.0589	1.1763	0.96	-0.0832	0.1236	0.5008	0.5435	0.5607	0.3324	-0.0319	0.2052	0.8764	-0.0257	0.2523	0.9188	0.1082	0.1865	0.5619	-0.0861	0.1786	0.6298	-0.0575	0.2417	0.8118	-0.0342	0.2049	0.8673	-0.1372	0.1907	0.4719	0.2504	0.2114	0.2363	0.1773	0.2468	0.4725	0.0053	0.6035	0.993	-0.5374	1.0495
999	60	upper face (IV)	-0.0451	0.2551	0.8598	0.0207	0.3764	0.9561	1.941	6.8752	0.7777	0.0859	0.5104	0.8664	-0.2182	1.3405	0.8707	0.0006	0.3699	0.9987	-0.0623	0.5807	0.9146	-0.4665	1.022	0.6481	-0.008	0.3185	0.98	-0.1631	0.5197	0.7537	0.5097	1.1726	0.6638	-0.0006	0.2615	0.9982	-0.1742	0.4952	0.725	-0.2693	0.5388	0.6172	1.6463	6.0612	0.7859	0.5876	2.6048
1000	60	upper face (IV)	0.1054	0.0839	0.2094	-0.0655	0.083	0.4305	-0.1733	0.6802	0.7989	0.0665	0.0913	0.4662	-0.5799	0.3577	0.105	0.0212	0.1295	0.8703	0.1603	0.1635	0.3267	-0.0813	0.1278	0.5248	0.1924	0.113	0.0886	-0.0137	0.1699	0.9357	-0.196	0.1284	0.1269	-0.0452	0.1169	0.6993	-0.0778	0.1204	0.5185	0.1353	0.1539	0.3793	-0.2487	0.3608	0.4907	1.0754	1.0677
1001	60	upper face (IV)	-0.0163	0.0765	0.8314	-0.1279	0.1055	0.2254	0.511	0.7842	0.5146	-0.0185	0.0803	0.8177	0.657	0.3451	0.0569	-0.0119	0.1321	0.9281	0.1185	0.1759	0.5007	0.0973	0.1219	0.4247	0.1078	0.1207	0.3718	0.231	0.1493	0.1217	0.0993	0.1332	0.4557	0.2142	0.1295	0.0983	0.3515	0.145	0.0154	0.3067	0.1691	0.0697	-0.4638	0.4998	0.3535	0.5589	0.7861
1002	60	upper face (IV)	-0.1022	0.0839	0.2232	-0.1831	0.1211	0.1307	0.4776	0.9387	0.6109	-0.0367	0.0864	0.6709	-0.2094	0.3723	0.5738	-0.1479	0.1648	0.3695	0.0776	0.2342	0.7404	0.0015	0.1256	0.9904	0.0758	0.121	0.5309	0.1339	0.1582	0.3973	0.1987	0.1593	0.2122	0.2459	0.1179	0.037	0.0981	0.1478	0.507	-0.0794	0.194	0.6822	0.6971	0.5595	0.2128	0.0884	0.6706
1003	61	upper face (IV)	-0.0279	0.0834	0.7384	-0.1688	0.1124	0.1331	0.3269	0.8988	0.7161	-0.0946	0.084	0.26	0.4245	0.3932	0.2803	-0.1399	0.1479	0.3442	-0.3387	0.2077	0.1029	0.0564	0.13	0.6642	0.0421	0.1312	0.7486	-0.267	0.1681	0.1121	-0.0127	0.1499	0.9324	-0.0636	0.1378	0.6442	0.021	0.1448	0.8848	-0.0126	0.1832	0.9451	-0.5077	0.496	0.306	0.0536	0.6563
1004	61	upper face (IV)	-0.1101	0.0855	0.1981	0.0369	0.0885	0.6769	-1.2099	1.5324	0.4298	-0.0369	0.0913	0.6865	0.5384	0.3553	0.1297	0.0896	0.1314	0.4956	-0.041	0.179	0.8186	0.1254	0.1231	0.3083	0.1074	0.1219	0.3782	0.1395	0.155	0.368	0.0504	0.1265	0.6905	0.0134	0.1159	0.908	0.1086	0.1254	0.3863	0.0055	0.1672	0.9739	-0.5885	0.4818	0.2219	-1.0122	1.0598
1005	61	upper face (IV)	-0.004	0.0737	0.9565	0.1978	0.0833	0.0176	0.1822	0.5845	0.7552	-0.0916	0.0703	0.1929	-0.2527	0.2779	0.3632	-0.1294	0.1146	0.2588	-0.0119	0.1575	0.9397	-0.0169	0.1092	0.8771	-0.1085	0.0995	0.2756	-0.2118	0.1809	0.2418	-0.1902	0.1129	0.092	-0.2982	0.0975	0.0022	-0.0671	0.1192	0.5734	-0.3451	0.1498	0.0212	-0.1235	0.3433	0.719	0.0102	0.548
1006	61	upper face (IV)	-0.0548	0.0767	0.475	0.042	0.0845	0.6191	0.1863	0.6115	0.7606	-0.0179	0.0779	0.8187	0.1301	0.2909	0.6548	-0.0192	0.123	0.8757	-0.1444	0.1644	0.3796	0.0607	0.1153	0.5984	-0.0376	0.104	0.7178	0.0704	0.1482	0.6349	0.2066	0.1214	0.0887	-0.0251	0.1075	0.8154	0.0033	0.1105	0.976	0.0003	0.1544	0.9986	0.0241	0.3887	0.9505	-0.4422	0.6199
1007	61	upper face (IV)	0.1173	0.075	0.118	0.153	0.102	0.1335	-0.0103	0.5453	0.985	0.0156	0.0804	0.8456	-0.8683	0.3825	0.0232	-0.1604	0.1399	0.2516	-0.0584	0.1627	0.7195	-0.0471	0.1077	0.6615	-0.0521	0.1091	0.6333	-0.0957	0.1581	0.545	-0.0186	0.1183	0.8752	-0.1279	0.1191	0.2829	-0.2067	0.1364	0.1297	0.0023	0.152	0.9878	0.4283	0.4176	0.305	0.5385	0.6665
1008	61	upper face (IV)	-0.0662	0.06	0.2696	0.0415	0.0866	0.6314	-0.6487	0.8967	0.4694	-0.0226	0.0608	0.7106	0.0692	0.2685	0.7966	0.2066	0.1193	0.0834	0.1429	0.1452	0.3252	0.0989	0.1117	0.376	0.0392	0.1065	0.7128	0.0814	0.1173	0.4876	0.1015	0.1346	0.4507	0.146	0.1049	0.164	-0.0191	0.1209	0.8744	-0.0276	0.1373	0.8408	-0.1599	0.3854	0.6781	-0.3569	0.6428
1009	61	upper face (IV)	-0.0171	0.0674	0.8001	-0.0777	0.083	0.3491	-0.1337	0.5424	0.8053	0.0501	0.0655	0.4444	0.2293	0.2441	0.3476	0.2105	0.11	0.0557	0.2517	0.1449	0.0823	0.065	0.1042	0.5328	0.0027	0.0885	0.9756	0.1481	0.1406	0.2923	0.0493	0.1039	0.6352	0.1992	0.0912	0.029	0.021	0.093	0.8217	0.2508	0.129	0.0519	0.0949	0.3107	0.76	0.119	0.4652
1010	61	upper face (IV)	0.1188	0.1052	0.2585	-0.0838	0.1478	0.5707	-1.6109	2.1605	0.4559	0.1792	0.113	0.1127	0.635	0.5217	0.2235	-0.1114	0.2057	0.5882	0.1086	0.2609	0.6772	0.0202	0.1772	0.9094	0.1058	0.1656	0.523	-0.1127	0.1869	0.5464	-0.1225	0.1834	0.5041	-0.0269	0.1639	0.8697	-0.1363	0.2009	0.4975	0.0945	0.214	0.6588	-1.0744	0.8138	0.1868	-0.9019	1.2596
1011	61	upper face (IV)	-0.0496	0.0619	0.4233	0.1144	0.0743	0.1237	0.0119	0.5809	0.9837	-0.1529	0.0673	0.0231	-0.0595	0.2573	0.817	0.0749	0.1151	0.515	0.114	0.1415	0.4201	0.0699	0.1011	0.4893	-0.0166	0.0953	0.8617	-0.0582	0.1235	0.6376	-0.0786	0.1087	0.4698	0.0146	0.101	0.885	0.0288	0.1127	0.7982	-0.1914	0.1278	0.134	-0.1255	0.3272	0.7014	0.1084	0.4988
1012	61	upper face (IV)	0.1577	0.0805	0.0501	0.0523	0.1047	0.6177	-0.3241	0.8415	0.7001	0.1968	0.0913	0.031	-0.209	0.3268	0.5224	0.1943	0.15	0.1953	0.3341	0.1937	0.0846	0.1735	0.1186	0.1435	0.0881	0.1398	0.5287	0.232	0.1502	0.1224	0.1375	0.1496	0.358	0.1599	0.1224	0.1913	0.1237	0.1428	0.3865	0.3597	0.2059	0.0807	-0.1504	0.4228	0.7221	-1.2378	1.1669
1013	61	upper face (IV)	-0.0641	0.0661	0.3325	-0.1557	0.1175	0.1853	0.2508	0.7268	0.7301	-0.0367	0.0657	0.5764	0.5932	0.3718	0.1106	-0.1037	0.1419	0.4648	-0.2279	0.1906	0.232	-0.2097	0.1313	0.1103	-0.1639	0.1139	0.1503	-0.1193	0.1382	0.3881	-0.1594	0.1426	0.2637	-0.0538	0.1179	0.6483	0.0544	0.1239	0.6608	0.0036	0.1801	0.984	-0.2211	0.4083	0.5881	0.5593	0.7468
1014	61	upper face (IV)	0.1054	0.0565	0.0621	0.1314	0.0832	0.1143	0.2169	0.5608	0.6989	0.0671	0.064	0.2949	-0.1938	0.2489	0.4362	-0.0963	0.1085	0.3752	0.1599	0.1424	0.2613	0.0702	0.0852	0.4096	-0.1139	0.0873	0.1919	-0.1858	0.1199	0.1212	-0.1773	0.1028	0.0847	-0.1362	0.0875	0.1194	-0.1336	0.1009	0.1857	-0.1389	0.1302	0.2861	0.1953	0.3243	0.5471	-0.094	0.455
1015	61	upper face (IV)	0.0718	0.0738	0.331	0.1129	0.0823	0.1705	0.6686	0.9297	0.472	0.089	0.0717	0.2146	-0.1601	0.2955	0.5879	0.098	0.1188	0.4091	0.3541	0.1666	0.0336	0.0219	0.1052	0.8353	-0.0557	0.0988	0.573	0.1623	0.1525	0.2873	-0.0252	0.1152	0.8272	0.1378	0.1013	0.1739	-0.0179	0.1178	0.8792	0.4303	0.1444	0.0029	0.5584	0.4409	0.2053	0.2779	0.5937
1016	61	upper face (IV)	0.1036	0.0804	0.1978	-0.1175	0.1149	0.3064	0.3841	0.9003	0.6696	0.0661	0.08	0.4087	-0.0159	0.3667	0.9655	-0.2684	0.1884	0.1541	-0.0515	0.2102	0.8066	-0.139	0.1493	0.3516	-0.1941	0.1471	0.1872	-0.3782	0.2052	0.0653	-0.2896	0.188	0.1234	-0.1805	0.1749	0.302	-0.0176	0.1522	0.9077	0.023	0.2014	0.9093	-0.3616	0.4811	0.4523	-0.0405	0.7264
1017	61	upper face (IV)	-0.0385	0.0687	0.5752	0.0463	0.0712	0.515	0.226	0.6126	0.7122	-0.0849	0.068	0.2118	-0.0972	0.2025	0.6311	-0.1256	0.098	0.1998	-0.156	0.1303	0.2314	0.0017	0.0925	0.9856	-0.0928	0.0773	0.2301	-0.0164	0.1301	0.8995	-0.1297	0.1012	0.2	-0.1003	0.0895	0.2623	-0.0311	0.1049	0.7669	-0.3793	0.1335	0.0045	0.2646	0.3551	0.4561	-0.0891	0.5158
1018	61	upper face (IV)	-0.0125	0.0662	0.8501	-0.2185	0.1128	0.0527	1.5486	2.0223	0.4438	-0.0863	0.0722	0.2319	-0.2646	0.3092	0.3922	-0.2769	0.1403	0.0484	-0.3033	0.1797	0.0915	-0.0932	0.1258	0.4587	-0.2058	0.1121	0.0664	-0.2642	0.1364	0.0528	-0.0234	0.1348	0.8619	-0.1292	0.1173	0.2706	0.1492	0.1346	0.2675	0.0696	0.166	0.6749	-0.0487	0.3951	0.9019	0.3556	0.6331
1019	61	upper face (IV)	0.0349	0.065	0.5918	0.2009	0.0701	0.0042	0.0247	0.5689	0.9654	0.0018	0.0686	0.9786	-0.1444	0.2538	0.5694	0.0363	0.1021	0.722	-0.0126	0.1313	0.9237	0.0352	0.1036	0.7338	0.0136	0.0766	0.8591	-0.1626	0.1417	0.2511	-0.0693	0.1072	0.518	-0.0043	0.0815	0.9577	-0.1457	0.102	0.1531	-0.3132	0.1284	0.0147	0.0496	0.3105	0.8732	-0.5658	0.6194
1020	61	upper face (IV)	-0.2261	0.0629	0.0003	-0.1294	0.0884	0.1432	0.3713	0.7665	0.628	-0.1649	0.0639	0.0099	0.1072	0.2871	0.7087	-0.0125	0.1204	0.9174	-0.2748	0.1803	0.1275	-0.0111	0.1051	0.9157	-0.0864	0.0998	0.3863	0.0727	0.1243	0.5584	0.177	0.1108	0.1101	0.0315	0.1019	0.757	0.1017	0.1099	0.3547	-0.1352	0.129	0.2948	0.1779	0.3563	0.6176	-0.0396	0.5461
1021	62	upper face (IV)	-0.0151	0.0946	0.8731	-0.0774	0.1362	0.5699	-0.1618	0.9173	0.86	-0.0064	0.1009	0.9493	0.2403	0.4318	0.5778	0.208	0.1866	0.265	0.3299	0.2848	0.2467	-0.0565	0.1426	0.6923	0.009	0.138	0.9479	-0.1487	0.1642	0.3654	-0.0248	0.1794	0.8899	-0.0111	0.1312	0.9328	0.0402	0.1593	0.801	0.022	0.2134	0.9179	-1.037	0.8091	0.1999	-0.314	0.8215
1022	62	upper face (IV)	0.0637	0.0838	0.4473	0.0237	0.109	0.8279	0.2203	0.8429	0.7938	0.0271	0.0854	0.7512	-0.0303	0.3517	0.9314	0.0844	0.1452	0.5608	0.2954	0.2257	0.1906	-0.0447	0.1207	0.7108	-0.0676	0.1197	0.5721	-0.077	0.1448	0.5951	-0.0662	0.154	0.6676	-0.0663	0.1205	0.5822	0.0813	0.1432	0.5701	0.1004	0.1871	0.5918	-1.2594	0.7572	0.0963	-0.1643	0.6367
1023	62	upper face (IV)	0.1079	0.0852	0.2054	-0.0936	0.1089	0.3903	0.038	0.7344	0.9587	0.1952	0.0881	0.0267	-0.1642	0.3184	0.6061	-0.1526	0.1322	0.2482	-0.1877	0.1799	0.2968	-0.2261	0.124	0.0682	0.0158	0.1091	0.885	0.0065	0.1651	0.9687	-0.2697	0.1412	0.0561	-0.1082	0.1219	0.3748	0.1827	0.1435	0.2029	-0.2659	0.1759	0.1307	0.5306	0.489	0.278	0.1231	0.6162
1024	62	upper face (IV)	-0.1675	0.0925	0.0702	-0.2433	0.1192	0.0413	0.6183	1.0384	0.5516	-0.0184	0.0836	0.8262	0.1122	0.3726	0.7632	-0.0033	0.1428	0.9813	0.2114	0.2042	0.3006	-0.0829	0.1343	0.5369	0.2099	0.1466	0.1523	0.4572	0.1865	0.0142	0.0779	0.1552	0.6155	0.0376	0.1162	0.7461	0.004	0.1526	0.9791	-0.1062	0.175	0.544	-0.136	0.4365	0.7554	0.5418	0.8146
1025	62	upper face (IV)	0.1451	0.1113	0.1923	0.0592	0.1556	0.7037	-0.123	1.0036	0.9024	-0.176	0.1349	0.1921	0.0435	0.4596	0.9247	-0.0481	0.1911	0.8012	-0.3776	0.2803	0.178	-0.0866	0.1655	0.6005	0.0074	0.1611	0.9634	-0.3642	0.2323	0.1169	-0.2452	0.2294	0.2851	-0.095	0.1424	0.5048	-0.3792	0.2475	0.1255	-0.0731	0.2091	0.7265	0.0272	0.5938	0.9634	-1.1277	1.3336
1026	62	upper face (IV)	0.0414	0.0773	0.5923	0.1162	0.0927	0.2101	0.1183	0.6838	0.8627	-0.029	0.0821	0.7242	-0.4432	0.3011	0.141	0.0027	0.1325	0.9838	-0.1418	0.1804	0.4318	-0.0565	0.1174	0.6303	-0.2008	0.1131	0.0758	-0.0699	0.147	0.6344	-0.1512	0.1251	0.2266	-0.0325	0.1063	0.7596	-0.0347	0.1261	0.7832	-0.2352	0.1609	0.1438	-0.5516	0.438	0.2079	0.3115	0.6598
1027	62	upper face (IV)	0.0658	0.079	0.4051	0.0736	0.106	0.4873	-0.3237	0.7927	0.683	0.0498	0.0792	0.5297	-0.9779	0.4352	0.0246	-0.039	0.1557	0.8021	0.1146	0.2099	0.5849	0.0516	0.1221	0.6725	-0.1593	0.1211	0.1883	-0.1804	0.1744	0.301	-0.0622	0.1425	0.6624	0.0499	0.1186	0.674	0.1656	0.156	0.2885	0.0221	0.1771	0.9009	-0.1164	0.3989	0.7704	-0.005	0.6659
1028	62	upper face (IV)	0.1444	0.2188	0.5094	-0.0407	0.2471	0.8691	-1.6289	3.309	0.6225	0.0729	0.1609	0.6502	-0.8379	1.2181	0.4915	0.0471	0.3602	0.896	0.906	1.5174	0.5504	0.1765	0.4102	0.6669	0.2273	0.4843	0.6388	0.3716	0.6601	0.5735	0.46	0.8931	0.6065	0.2347	0.4523	0.6038	0.113	0.3664	0.7579	0.725	1.2667	0.5671	-0.5743	1.2638	0.6495	-1.5938	2.4197
1029	62	upper face (IV)	-0.1663	0.0699	0.0174	-0.0446	0.0878	0.6117	-0.0936	0.6535	0.8862	-0.1504	0.0693	0.03	0.0668	0.2567	0.7947	0.1872	0.1168	0.109	-0.1272	0.1674	0.4474	0.0083	0.0959	0.9313	0.1046	0.0993	0.2921	0.2522	0.1193	0.0344	0.2176	0.1251	0.082	0.2222	0.0995	0.0255	-0.0587	0.1134	0.6043	-0.0029	0.1456	0.9839	-0.0818	0.3295	0.804	0.7589	0.7647
1030	62	upper face (IV)	0.161	0.063	0.0106	-0.0033	0.0749	0.9647	-0.3163	0.645	0.6239	0.1798	0.0646	0.0054	-0.4111	0.2898	0.1561	-0.0035	0.1094	0.9746	0.0297	0.1434	0.8359	-0.0439	0.0905	0.6271	0.099	0.0898	0.2702	-0.1449	0.1263	0.2516	-0.057	0.1052	0.5883	0.0268	0.0972	0.7826	0.044	0.1228	0.7199	0.0845	0.1365	0.5355	0.1686	0.3417	0.6218	0.3632	0.6286
1031	62	upper face (IV)	0.0221	0.0947	0.8156	-0.0255	0.133	0.848	-1.1627	1.7817	0.514	-0.0266	0.1034	0.7969	0.4035	0.461	0.3814	0.2401	0.2258	0.2876	-0.4626	0.3188	0.1468	-0.1417	0.1891	0.4535	0.0025	0.1678	0.9883	-0.3557	0.2731	0.1928	-0.252	0.2311	0.2756	0.0306	0.1715	0.8585	-0.3134	0.2421	0.1956	-0.3319	0.2572	0.1969	0.9774	0.7171	0.1729	0.4535	0.8986
1032	62	upper face (IV)	0.042	0.1207	0.7282	0.0702	0.1644	0.6695	-0.0177	1.0384	0.9864	0.0105	0.1358	0.9381	-1.199	0.8312	0.1491	-0.2431	0.2661	0.361	0.5709	0.4013	0.1548	0.0406	0.1859	0.8272	0.0198	0.182	0.9135	0.3487	0.2672	0.1919	0.1412	0.243	0.5613	-0.0674	0.1889	0.7213	-0.0949	0.218	0.6634	-0.238	0.272	0.3817	0.2178	0.6512	0.738	-0.6433	1.2449
1033	62	upper face (IV)	0.0125	0.0707	0.8599	0.1192	0.1042	0.2526	-0.7656	1.1048	0.4883	0.0211	0.08	0.792	0.0191	0.3231	0.9529	0.094	0.1373	0.4933	0.4283	0.2048	0.0365	0.197	0.13	0.1296	-0.0814	0.1285	0.5263	-0.1964	0.1541	0.2024	0.0555	0.1382	0.6882	-0.0515	0.1253	0.681	0.0976	0.1476	0.5084	0.2721	0.1803	0.1314	-0.1765	0.3978	0.6573	-1.0546	1.0623
1034	63	upper face (IV)	-0.0683	0.0687	0.3204	0.1447	0.0955	0.1297	0.1872	0.6715	0.7804	0.0072	0.0657	0.9126	0.1504	0.3011	0.6174	-0.018	0.1281	0.8881	-0.197	0.1485	0.1847	-0.0185	0.1021	0.8564	0.1771	0.1231	0.1502	0.0578	0.1281	0.6519	0.1299	0.1304	0.3192	0.0795	0.1124	0.4794	0.0514	0.1225	0.6749	-0.1588	0.1547	0.3049	-0.1034	0.3602	0.774	-0.8057	0.8964
1035	63	upper face (IV)	0.0501	0.1099	0.6487	-0.1038	0.1256	0.4087	-0.7927	1.441	0.5823	-0.0435	0.1019	0.6698	-0.0669	0.4217	0.874	0.0384	0.1553	0.8046	0.0523	0.2253	0.8165	0.0713	0.1423	0.6164	0.1375	0.1479	0.3528	0.2313	0.2093	0.2692	0.2102	0.1633	0.1981	-0.0454	0.1312	0.7291	0.0952	0.171	0.5778	-0.0936	0.2046	0.6475	-0.4943	0.5575	0.3753	-0.7656	0.9815
1036	63	upper face (IV)	-0.0219	0.08	0.7841	0.1045	0.0993	0.2928	-0.3536	0.8443	0.6754	0.0448	0.0782	0.5669	0.0853	0.3323	0.7973	0.095	0.1533	0.5355	0.0476	0.1826	0.7945	-0.0064	0.1197	0.9576	0.1705	0.1302	0.1905	0.175	0.1539	0.2555	0.1036	0.1562	0.5071	0.2054	0.138	0.1366	-0.1347	0.16	0.3998	-0.0616	0.1879	0.743	0.2019	0.4725	0.6692	0.1654	0.6029
1037	63	upper face (IV)	0.0877	0.0956	0.3589	-0.2323	0.1583	0.1423	-2.6692	3.1949	0.4034	0.0451	0.1039	0.6641	-0.364	0.4171	0.3829	-0.2179	0.2114	0.3028	0.0244	0.2563	0.9241	0.0563	0.1615	0.7273	-0.1168	0.156	0.4539	-0.0927	0.2018	0.6461	-0.0559	0.1701	0.7425	-0.2162	0.1692	0.2013	-0.284	0.2221	0.201	0.0169	0.2179	0.9383	0.5507	0.6333	0.3845	-0.3101	0.8248
1038	63	upper face (IV)	-0.0366	0.0558	0.5114	0.1304	0.0645	0.0432	0.1521	0.4866	0.7547	0.0826	0.0553	0.1355	0.4166	0.2687	0.121	-0.085	0.0938	0.3646	0.0117	0.1181	0.9207	-0.0214	0.0836	0.7981	0.0851	0.0884	0.3357	0.0859	0.1137	0.4501	0.0416	0.107	0.6974	0.0582	0.0912	0.5237	0.0058	0.0953	0.9514	0.0371	0.1146	0.7458	0.1617	0.3258	0.6196	-0.4548	0.5826
1039	63	upper face (IV)	0.0258	0.078	0.7414	0.0959	0.1062	0.3665	0.3019	0.8161	0.7115	0.049	0.0759	0.5187	-0.0011	0.3203	0.9973	-0.2283	0.1601	0.1538	-0.0205	0.2011	0.9189	-0.0049	0.127	0.9691	0.0404	0.1199	0.7364	0.2403	0.1617	0.1372	0.2251	0.1548	0.1459	0.0004	0.1268	0.9972	0.1782	0.1554	0.2515	-0.0345	0.1762	0.8448	-0.5353	0.5011	0.2853	-0.1155	0.6248
1040	63	upper face (IV)	-0.0162	0.0757	0.8306	0.0421	0.09	0.6404	0.1674	0.7182	0.8157	0.0675	0.0761	0.375	0.292	0.3037	0.3363	-0.2637	0.1475	0.0738	0.025	0.1925	0.8968	0.0352	0.1189	0.7671	0.0551	0.1088	0.6126	0.2435	0.1633	0.1359	0.2068	0.141	0.1425	-0.051	0.1208	0.6728	0.1299	0.1399	0.3533	0.05	0.1709	0.7698	-0.4781	0.4429	0.2803	-0.0558	0.5996
1041	63	upper face (IV)	-0.0329	0.0796	0.6791	-0.1284	0.101	0.2037	0.142	0.8678	0.87	-0.0232	0.0803	0.7728	-0.2232	0.3233	0.4899	-0.139	0.1404	0.3224	-0.1289	0.2016	0.5228	0.0963	0.1213	0.4272	-0.152	0.1187	0.2003	-0.1538	0.1564	0.3253	0.0669	0.1323	0.6134	-0.1366	0.1159	0.2384	0.1233	0.1434	0.39	-0.0363	0.1854	0.8447	-0.1036	0.4452	0.8159	0.1565	0.661
1042	63	upper face (IV)	0.0739	0.0759	0.3301	0.0631	0.1111	0.5699	0.3616	0.7562	0.6325	0.0523	0.0783	0.504	-0.006	0.3048	0.9844	-0.0549	0.145	0.7049	0.0322	0.1856	0.8624	-0.0369	0.1249	0.7676	0.0456	0.1182	0.6999	0.1244	0.1431	0.3847	0.142	0.1427	0.3196	0.0824	0.1171	0.4819	0.1259	0.1451	0.3857	0.0421	0.1847	0.8196	0.215	0.4056	0.5961	0.3269	0.6764
1043	63	upper face (IV)	-0.0166	0.0945	0.8602	-0.096	0.1287	0.4556	-0.2068	1.0805	0.8482	-0.0417	0.0989	0.6732	-0.0595	0.4297	0.8898	0.0741	0.1776	0.6767	-0.0513	0.2235	0.8183	-0.291	0.1778	0.1018	-0.1758	0.1615	0.2763	-0.4224	0.2227	0.0579	-0.1268	0.1749	0.4683	0.0506	0.1414	0.7203	-0.3374	0.2018	0.0946	-0.0189	0.2104	0.9284	-0.3721	0.5705	0.5143	-0.0106	0.7577
1044	63	upper face (IV)	-0.1147	0.0768	0.1351	-0.0508	0.0839	0.5449	-0.1261	0.664	0.8493	-0.0956	0.0717	0.1825	0.1452	0.283	0.6079	-0.1012	0.1156	0.3814	-0.0819	0.1522	0.5907	-0.2522	0.1162	0.03	-0.1531	0.1071	0.153	-0.1412	0.1284	0.2717	-0.1413	0.1173	0.2281	-0.0571	0.0977	0.5586	0.0388	0.1179	0.7421	0.0526	0.1319	0.6897	-0.6591	0.438	0.1324	0.426	0.5954
1045	63	upper face (IV)	-0.1859	0.1126	0.0988	0.1357	0.1367	0.3208	-1.3513	1.8592	0.4673	-0.1834	0.1154	0.112	0.1118	0.4091	0.7846	-0.036	0.1813	0.8425	-0.0089	0.2555	0.9723	0.1368	0.1456	0.3473	-0.2458	0.1597	0.1238	-0.0427	0.1716	0.8036	-0.0415	0.1691	0.806	-0.0931	0.1433	0.5158	-0.0119	0.1831	0.9483	-0.2202	0.241	0.3608	-0.1359	0.5306	0.7979	0.3298	0.867
1046	63	upper face (IV)	0.1843	0.0928	0.0471	0.0987	0.112	0.3782	0.1714	0.788	0.8278	-0.019	0.0908	0.8342	0.1069	0.3306	0.7465	0.1592	0.1524	0.2963	0.2385	0.2055	0.2457	0.0034	0.1298	0.9794	0.1743	0.1199	0.146	0.0701	0.1763	0.6911	0.0931	0.1383	0.5007	0.137	0.1254	0.2745	0.2119	0.1431	0.1385	0.1235	0.2002	0.5372	0.1576	0.4624	0.7333	0.3721	0.7632
1047	63	upper face (IV)	-0.1483	0.096	0.1227	-0.0576	0.1251	0.6453	0.407	1.0528	0.699	-0.089	0.0994	0.3706	0.2491	0.4052	0.5387	0.0384	0.1855	0.8361	-0.0847	0.235	0.7186	-0.1734	0.1617	0.2835	0.1997	0.1645	0.2246	0.0961	0.2189	0.6607	0.0028	0.1977	0.9887	0.1682	0.1628	0.3015	-0.3736	0.2062	0.07	-0.2683	0.2357	0.2549	-0.2633	0.5093	0.6051	0.1665	0.7925
1048	63	upper face (IV)	-0.114	0.5469	0.8349	-0.2286	0.9078	0.8011	-1.6956	6.7328	0.8012	-0.1562	0.7165	0.8274	0.5961	2.3418	0.7991																												-1.3282	5.4291	0.8067	1.773	7.6089
[truncated: 67 more columns]
